# Supplementary material
Source: publisher figshare collection journal article supplement (https://acs.figshare.com/ndownloader/files/17427551)
Supplement: Supplementary file 1 [file 17427551]

# Double Thiol-Chiral Brønsted Base Catalysis: Asymmetric Cross Rauhut–Currier Reaction and Sequential [4 + 2] Annulation for Assembly of Different Activated Olefins

Zhi Zhou,<sup>†,§</sup> Qing He,<sup>†,§</sup> Ying Jiang,<sup>†</sup> Qin Ouyang,<sup>‡</sup> Wei Du,<sup>\*,†</sup> and Ying-Chun Chen<sup>\*,‡,§</sup>

<sup>†</sup>Key Laboratory of Drug-Targeting and Drug Delivery System of the Ministry of Education and Sichuan Research Center for Drug Precision Industrial Technology, West China School of Pharmacy, Sichuan University, Chengdu 610041, China

<sup>‡</sup>College of Pharmacy, Third Military Medical University, Chongqing 400038, China

e-mail: duweiyb@scu.edu.cn; ycchen@scu.edu.cn

<sup>§</sup>Z. Z. and Q. H. contributed equally to this work.

## Supporting Information

|                                                                                                                                         |     |
|-----------------------------------------------------------------------------------------------------------------------------------------|-----|
| 1. General methods .....                                                                                                                | S2  |
| 2. More screening conditions for the cross RC reaction of enone 1a with isatin-derived<br>alkylidene malononitrile 2a .....             | S2  |
| 3. Screening conditions for the three-component domino [2 + 2 + 2] annulation and<br>substrate scope.....                               | S4  |
| 4. More screening conditions for the cross RC reaction of 2-cyclohexenone with 2a and one-<br>pot [4 + 2] annulation.....               | S6  |
| 5. General procedure for the cross RC reactions of enones 1 with isatin-derived alkylidene<br>malononitriles 2 and annulations .....    | S7  |
| 6. More screening conditions for the cross RC reaction of enone 1a with $\alpha$ -cyano chalcone<br>11a and annulation .....            | S21 |
| 7. General procedure for the cross RC reactions of enone 1a with $\alpha$ -cyano chalcones 11 and<br>annulations.....                   | S22 |
| 8. Reaction at a 1.0 mmol scale .....                                                                                                   | S29 |
| 9. Procedure for the cross RC reaction-initiated [4 + 2] annulation .....                                                               | S30 |
| 10. More attempts for the cross RC reaction-initiated [4 + 2] annulations .....                                                         | S30 |
| 11. Synthetic transformations of the annulation products 5a and 12a .....                                                               | S31 |
| 12. Crystal data and structure refinement for enantiopure 5g and 12f .....                                                              | S35 |
| 13. DFT calculations of the key intermediates for the asymmetric cross Rauhut–Currier<br>reaction and proposed catalytic mechanism..... | S38 |
| 14. NMR spectra and HPLC chromatograms .....                                                                                            | S57 |

## 1. General methods

NMR data were obtained for  $^1\text{H}$  at 400 MHz or 600 MHz, and for  $^{13}\text{C}$  at 100 MHz or 150 MHz. Chemical shifts were reported in ppm from tetramethylsilane with the solvent resonance as the internal standard in  $\text{CDCl}_3$  solution. ESI HRMS was recorded on a Waters SYNAPT G2. In each case, enantiomeric ratio was determined by HPLC analysis on a chiral column in comparison with the authentic racemate, using a Daicel Chiralpak AD-H Column ( $250 \times 4.6$  mm), Chiralcel OD-H Column ( $250 \times 4.6$  mm), Chiralpak IB Column ( $250 \times 4.6$  mm), Chiralpak ID Column ( $250 \times 4.6$  mm) UV detection was monitored at 220 nm or 254 nm. Optical rotation was measured in  $\text{CHCl}_3$  solution at 25 °C or 20 °C. Column chromatography was performed on silica gel (200-300 mesh) eluting with EtOAc and petroleum ether. TLC was performed on glass-backed silica plates. UV light,  $\text{I}_2$ , and solution of potassium permanganate were used to visualize products or starting materials. All chemicals were used without purification as commercially available unless otherwise noted. Petroleum ether and EtOAc were distilled. THF was freshly distilled from sodium/benzophenone before use. Experiments involving moisture and/or air sensitive components were performed under a positive pressure of argon in oven-dried glassware equipped with a rubber septum inlet. Dried solvents and liquid reagents were transferred by oven-dried syringes. The substrates were synthesized according to the literature procedures.<sup>1</sup>

(1) (a) Peng, J.; Ran, G.-Y.; Du, W.; Chen, Y.-C. *Org. Lett.* **2015**, *17*, 4490–4493. (b) Shi, M.-L.; Zhan, G.; Zhou, S.-L.; Du, W.; Chen, Y.-C. *Org. Lett.* **2016**, *18*, 6480–6483.

## 2. More screening conditions for the cross RC reaction of enone **1a** with isatin-derived alkylidene malononitrile **2a**

As noted in the text, the reaction was performed with 2-mercaptobenzoic acid **T1**, cinchonidine derived PTC and  $\text{K}_2\text{CO}_3$  in toluene at 25 °C for 24 h to 48 h, giving the RC adduct with 83:17 er, 78% yield. Then an array of PTCs were investigated, and the cinchonine derived PTC **C2** gave the best enantioselectivity and reactivity (92% yield, 93:7 er).

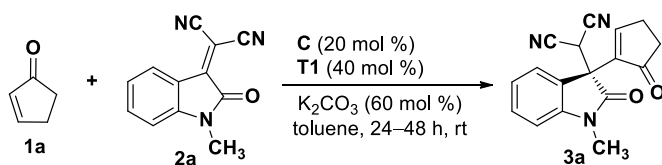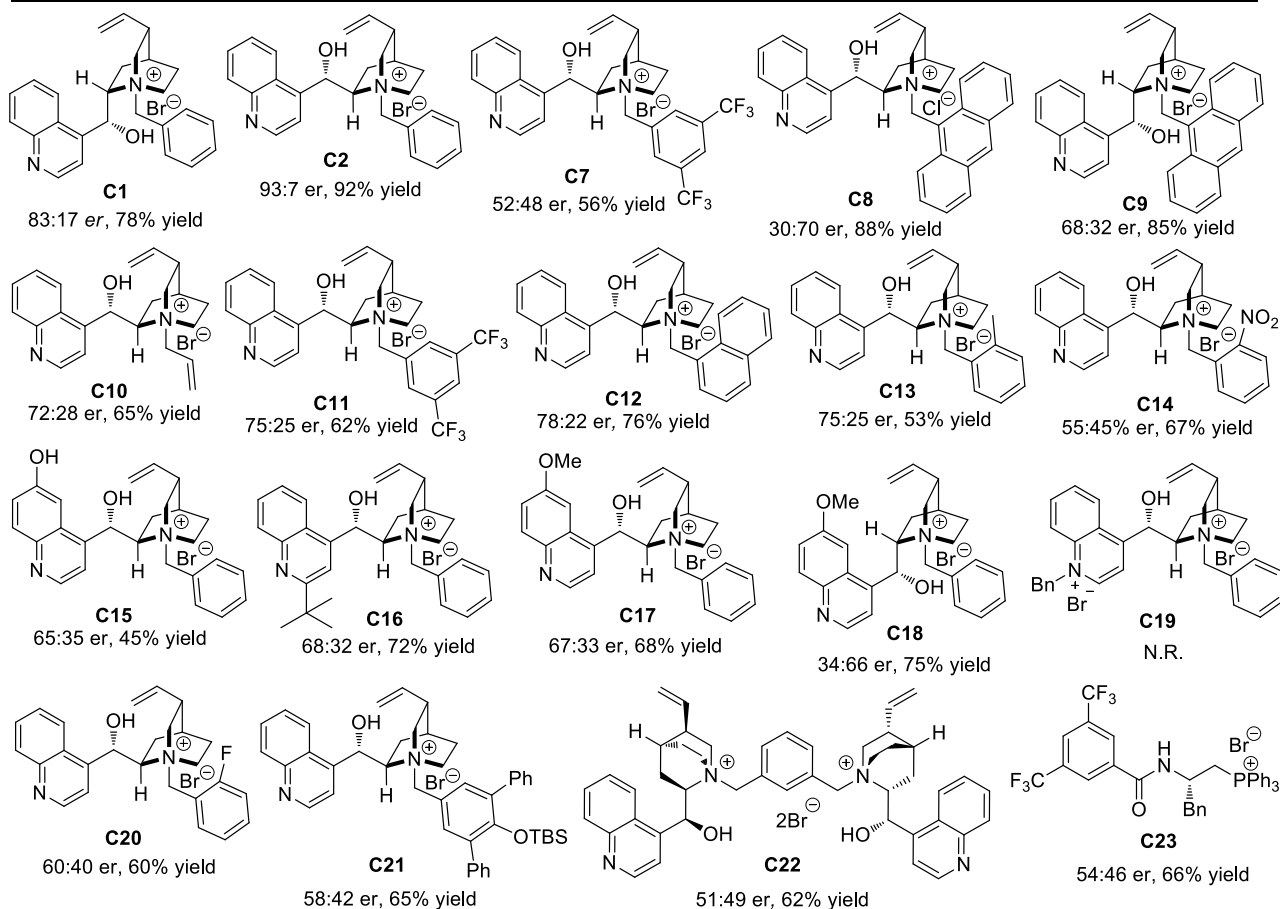

After screening many parameters, we paid our attention to structural modifications of the catalysts.

Some bifunctional PTCs were prepared and investigated.

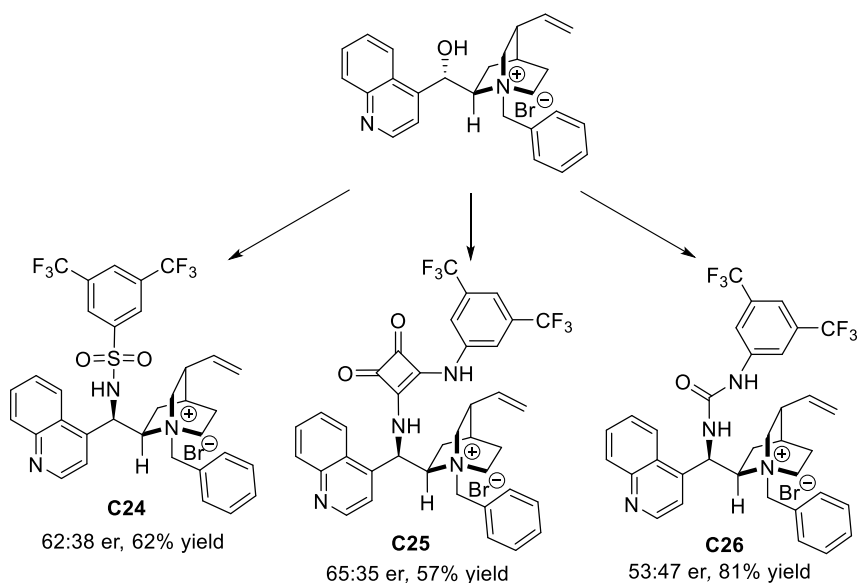

More screening studies on other electrophiles resulted in no success.

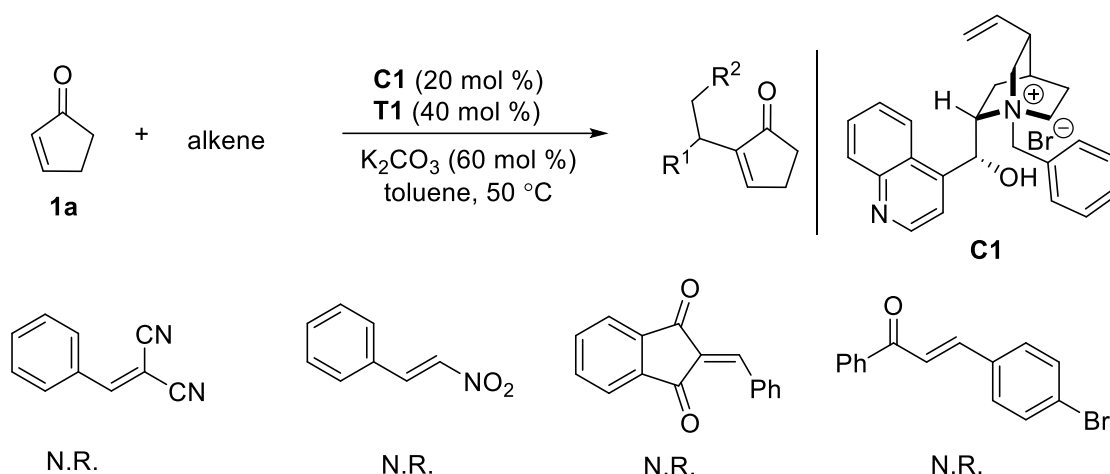

### 3. Screening conditions for the three-component domino [2 + 2 + 2] annulation and substrate scope

#### 3.1 Screening conditions for the three-component domino [2 + 2 + 2] annulation<sup>a</sup>

| entry | 1:2a:4a | X  | Y  | Z   | time<br>(h) | temp<br>( °C) | yield<br>(%) <sup>b</sup> | er <sup>c</sup> | dr <sup>c</sup> |
|-------|---------|----|----|-----|-------------|---------------|---------------------------|-----------------|-----------------|
| 1     | 2:1:1   | 20 | 40 | 60  | 18          | 50            | 62                        | 86.5:13.5       | 3:1             |
| 2     | 2:1:1   | 20 | 40 | 60  | 30          | 35            | 73                        | 87.5:12.5       | 3:1             |
| 3     | 1.5:1:1 | 20 | 40 | 60  | 48          | 35            | /                         |                 |                 |
| 4     | 3:1:1   | 20 | 40 | 60  | 24          | 35            | 71                        | 81:19           | 2:1             |
| 5     | 3:1:1   | 20 | 40 | 80  | 15          | 35            | 74                        | 82.5:17.5       | 2:1             |
| 6     | 3:1:1   | 20 | 40 | 120 | 10          | 35            | 68                        | 82:18           | 1.8:1           |
| 7     | 3:1:1   | 20 | 40 | 80  | 48          | 25            | 71                        | 84:16           | 3:1             |

<sup>a</sup>Unless noted otherwise, reactions were performed with 2-cyclopentenone **1a** (0.2 mmol), activated olefin **2a** (0.1 mmol), nitroolefin **4a** (0.1 mmol), PTC **C2**, thiol **T1** and  $K_2CO_3$  in toluene (1.0 mL) for 10–48 h. <sup>b</sup>Isolated yield. <sup>c</sup>Determined by HPLC analysis on a chiral stationary phase.



It was found that chemoselective assembly of the three different activated alkenes could be conducted under the catalysis of thiol **T1** and PTC **C2**. However, the reaction would quickly become dark after the early addition of nitroolefin **4a**, which might probably result from its aggregation promoted by thiol addition. As summarized in the above table, the yield together with stereoselectivity generally decreased significantly compared to those in the sequential one-pot process, even under the optimized conditions.

### 3.2 Substrate scope of the three-component domino [2 + 2 + 2] annulation<sup>a</sup>

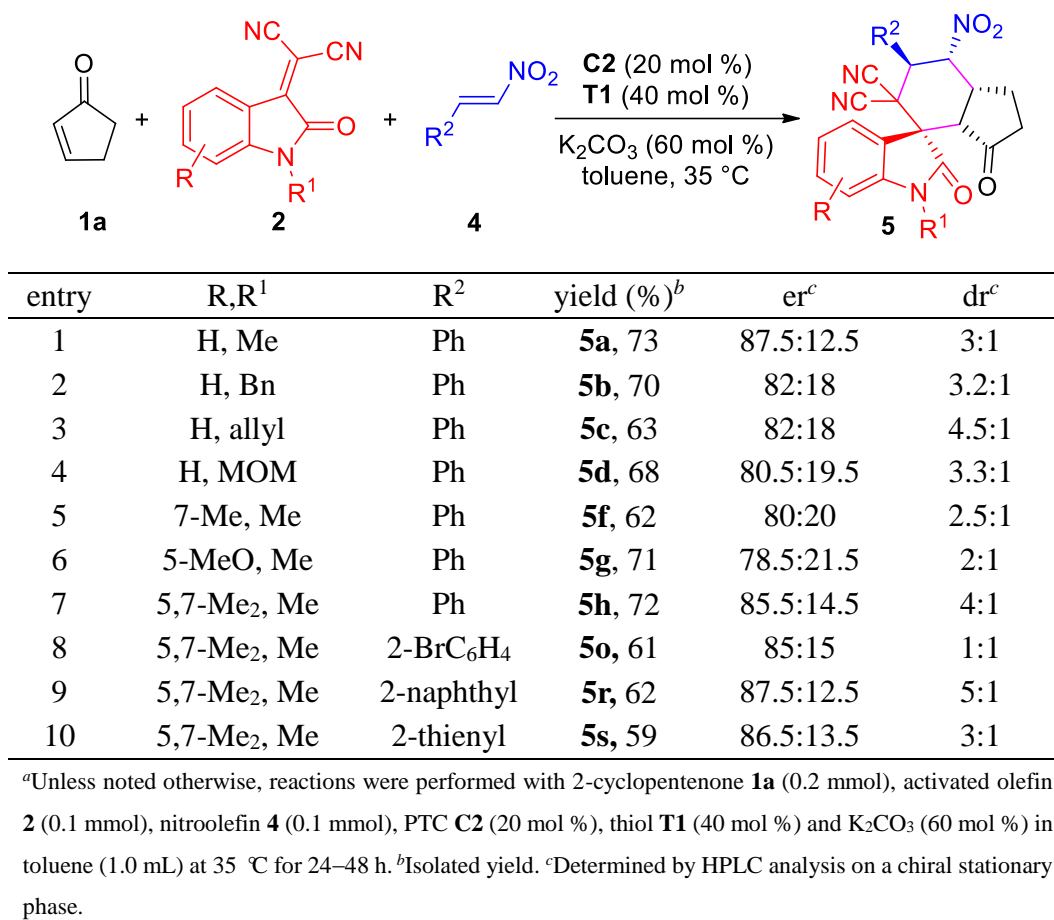

Some other activated olefins or nitroolefins were applied to the three-component reaction as well, and the corresponding products **5** were generally obtained with moderate yields and stereoselectivity. Therefore, better data were obtained by conducting the RC/[4 + 2] annulation in a sequential process.

#### 4. More screening conditions for the cross RC reaction of 2-cyclohexenone with 2a and one-pot [4 + 2] annulation<sup>a</sup>

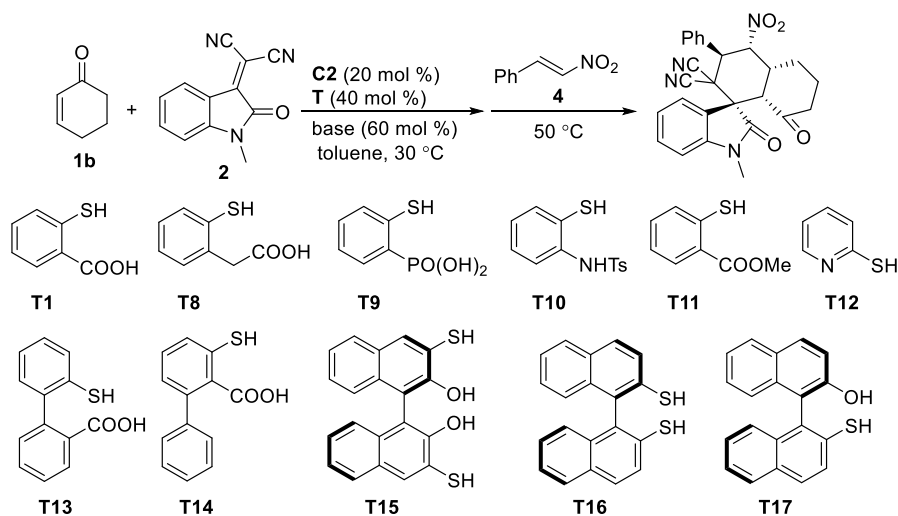

| entry | T          | base                            | yield (%) <sup>b</sup> | er (%) <sup>c</sup> |
|-------|------------|---------------------------------|------------------------|---------------------|
| 1     | <b>T1</b>  | K <sub>2</sub> CO <sub>3</sub>  | 75                     | 64.5:35.5           |
| 2     | <b>T8</b>  | K <sub>2</sub> CO <sub>3</sub>  | <10                    | /                   |
| 3     | <b>T9</b>  | K <sub>2</sub> CO <sub>3</sub>  | <10                    | /                   |
| 4     | <b>T10</b> | K <sub>2</sub> CO <sub>3</sub>  | <10                    | /                   |
| 5     | <b>T11</b> | K <sub>2</sub> CO <sub>3</sub>  | <10                    | /                   |
| 6     | <b>T12</b> | K <sub>2</sub> CO <sub>3</sub>  | 78                     | 53:47               |
| 7     | <b>T13</b> | K <sub>2</sub> CO <sub>3</sub>  | <10                    | /                   |
| 8     | <b>T14</b> | K <sub>2</sub> CO <sub>3</sub>  | 73                     | 60:40               |
| 9     | <b>T15</b> | K <sub>2</sub> CO <sub>3</sub>  | /                      |                     |
| 10    | <b>T16</b> | K <sub>2</sub> CO <sub>3</sub>  | /                      |                     |
| 11    | <b>T17</b> | K <sub>2</sub> CO <sub>3</sub>  | /                      |                     |
| 12    | <b>T1</b>  | Na <sub>2</sub> CO <sub>3</sub> | /                      |                     |
| 13    | <b>T1</b>  | Cs <sub>2</sub> CO <sub>3</sub> | 46                     | 59:41               |
| 14    | <b>T1</b>  | K <sub>3</sub> PO <sub>4</sub>  | 54                     | 57.5:42.5           |

<sup>a</sup>Unless noted otherwise, reactions were performed with 2-cyclohexenone (0.8 mmol), activated alkene **2** (0.1 mmol), PTC **C2** (20 mol %), thiol **T** (40 mol %), base (60 mol %) in toluene (0.5 mL) at 30 °C for 48–72 h. After completion, nitroolefin **4** (0.1 mmol) was added, and stirred at 50 °C for 4 h. <sup>b</sup>Isolated yield. <sup>c</sup>Determined by HPLC analysis on a chiral stationary phase; dr >19:1.

As outlined in the above table, we further screened a number of thiol compounds for the reaction of 2-cyclohexenone, but the results could not be further improved.

## 5. General procedure for the cross RC reactions of enones **1** with isatin-derived alkylidene malononitriles **2** and annulations

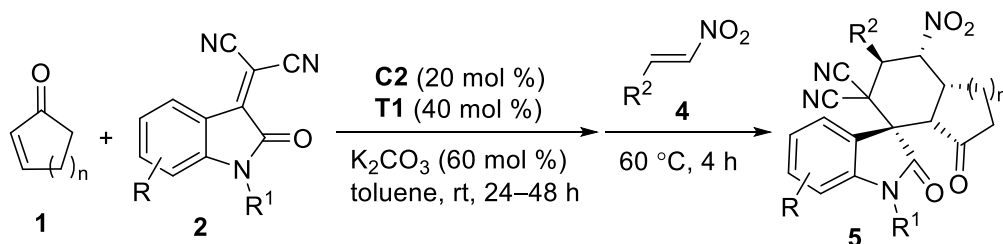

A mixture of cyclic enone **1** (0.2 mmol, 2.0 equiv), activated olefin **2** (0.1 mmol, 1.0 equiv), PTC **C2** (20 mol %), thiol **T1** (40 mol %) and  $K_2CO_3$  (60 mol %) in toluene (1.0 mL) was stirred at room temperature for 24 h. After completion, nitroolefin **4** (0.1 mmol, 1.0 equiv) was added and the reaction was stirred at 60 °C for 4 h. Then the annulation product **5** was obtained by flash chromatography on silica gel (EtOAc/petroleum ether = 1/8–1/5).

Most racemates could be obtained by using triethylamine and thiol **T1** as the catalysts, but a few reactions failed. So two peaks of these enantiomers were assigned by HPLC analysis on a chiral stationary phase with the mixture of two enantiomers, which were produced by using quinine and quindine as the catalyst, respectively.

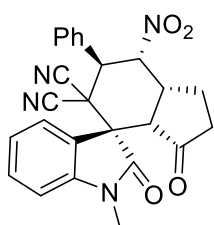

**Synthesis of 5a:** 2-Cyclopentenone **1a** (16.4 mg, 0.2 mmol), 2-(1-methyl-2-oxoindolin-3-ylidene)malononitrile **2a** (20.9 mg, 0.1 mmol), PTC **C2** (9.3 mg, 0.02 mmol), 2-mercaptobenzoic acid **T1** (6.2 mg, 0.04 mmol) and  $K_2CO_3$  (8.3 mg, 0.06 mmol) were stirred in distilled toluene (1.0 mL) at rt for 24 h. Then (*E*)- $\beta$ -nitrostyrene **4a** (14.9 mg, 0.1 mmol) was added and the reaction was stirred at 60 °C for 4 h. After completion, purification by flash chromatography on silica gel (EtOAc/petroleum ether = 1/8–1/5) gave product **5a**: 38.7 mg, as a white solid, yield 88%;  $[\alpha]_D^{20}$ : +52.0 ( $c$  = 0.32 in  $CHCl_3$ ); 93:7 er, determined by HPLC analysis [Daicel Chiralpak AD-H, *n*-hexane/*i*-PrOH = 60/40, 1.0 mL min<sup>-1</sup>,  $\lambda$  = 254 nm]: *t* (major) = 8.08 min, *t* (minor) = 9.84 min; <sup>1</sup>H NMR (600 MHz,  $CDCl_3$ ):  $\delta$  (ppm) 7.68 (d,  $J$  = 8.4 Hz, 1H), 7.55–7.53 (m, 2H), 7.49 (t,  $J$  = 8.6 Hz, 1H), 7.45–7.43 (m, 3H), 7.27 (t,  $J$  = 8.6 Hz, 1H), 6.96 (d,  $J$  = 7.2 Hz, 1H), 5.93 (dd,  $J$  = 12.6, 7.2 Hz, 1H), 5.34 (d,  $J$  = 12.6 Hz, 1H), 3.55–3.52 (m, 1H), 3.34–3.28 (m, 1H), 3.26 (s, 3H), 2.95–2.90 (m, 1H), 2.50 (dd,  $J$  = 19.2, 9.0 Hz, 1H), 2.33–2.26 (m, 1H), 1.82–1.77 (m, 1H); <sup>13</sup>C NMR (150 MHz,  $CDCl_3$ ):  $\delta$  (ppm) 212.3, 172.2, 143.4, 131.8,

131.3, 130.1, 129.5, 125.1, 124.5, 124.3, 111.6, 110.3, 109.4, 84.2, 53.1, 48.4, 48.3, 39.7, 38.4, 38.3, 27.0, 22.6; ESI-HRMS: calcd. for  $C_{25}H_{20}N_4O_4+Na^+$  463.1377, found 463.1375.

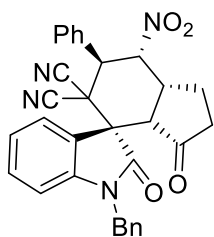

**Synthesis of 5b:** 2-Cyclopentenone **1a** (16.4 mg, 0.2 mmol), 2-(1-benzyl-2-oxoindolin-3-ylidene)malononitrile (28.5 mg, 0.1 mmol), PTC **C2** (9.3 mg, 0.02 mmol), 2-mercaptobenzoic acid **T1** (6.2 mg, 0.04 mmol) and  $K_2CO_3$  (8.3 mg, 0.06 mmol) were stirred in distilled toluene (1.0 mL) at rt for 24 h. Then (*E*)- $\beta$ -

nitrostyrene **4a** (14.9 mg, 0.1 mmol) was added and the reaction was stirred at 60 °C for 4 h. After completion, purification by flash chromatography on silica gel (EtOAc/petroleum ether = 1/8–1/5) gave product **5b**: 41.2 mg, as a white solid, yield 80%;  $[\alpha]_D^{20}$ : +38.5 ( $c$  = 0.26 in  $CHCl_3$ ); 90.5:9.5 er, determined by HPLC analysis [Daicel Chiralpak AD-H, *n*-hexane/*i*-PrOH = 60/40, 1.0 mL min<sup>-1</sup>,  $\lambda$  = 254 nm]:  $t$  (major) = 6.28 min,  $t$  (minor) = 8.62 min; <sup>1</sup>H NMR (600 MHz,  $CDCl_3$ ):  $\delta$  (ppm) 7.71 (d,  $J$  = 7.2 Hz, 1H), 7.57–7.55 (m, 2H), 7.46–7.45 (m, 3H), 7.42–7.38 (m, 3H), 7.30–7.22 (m, 4H), 6.79 (d,  $J$  = 7.8 Hz, 1H), 5.95 (dd,  $J$  = 13.2, 7.2 Hz, 1H), 5.41 (d,  $J$  = 12.6 Hz, 1H), 5.05 (d,  $J$  = 16.2 Hz, 1H), 4.88 (d,  $J$  = 16.2 Hz, 1H), 3.56–3.53 (m, 1H), 3.33 (d,  $J$  = 9.0 Hz, 1H), 2.95–2.93 (m, 1H), 2.45 (dd,  $J$  = 19.2, 8.4 Hz, 1H), 2.32–2.30 (m, 1H), 1.81–1.79 (m, 1H); <sup>13</sup>C NMR (150 MHz,  $CDCl_3$ ):  $\delta$  (ppm) 212.3, 172.4, 142.7, 134.0, 131.7, 131.2, 130.0, 129.5, 128.8, 127.9, 126.9, 125.0, 124.5, 124.3, 111.6, 110.5, 110.4, 84.1, 52.7, 48.8, 48.3, 44.8, 39.8, 38.5, 38.2, 22.5; ESI-HRMS: calcd. for  $C_{31}H_{24}N_4O_4+Na^+$  539.1690, found 539.1692.

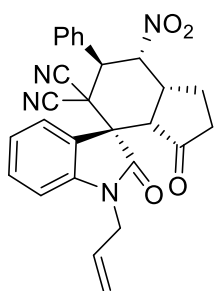

**Synthesis of 5c:** 2-Cyclopentenone **1a** (16.4 mg, 0.2 mmol), 2-(1-allyl-2-oxoindolin-3-ylidene)malononitrile (20.9 mg, 0.1 mmol), PTC **C2** (9.3 mg, 0.02 mmol), 2-mercaptobenzoic acid **T1** (6.2 mg, 0.04 mmol) and  $K_2CO_3$  (8.3 mg, 0.06 mmol) were stirred in distilled toluene (1.0 mL) at rt for 24 h. Then (*E*)- $\beta$ -

nitrostyrene **4a** (14.9 mg, 0.1 mmol) was added and the reaction was stirred at 60 °C for 4 h. After completion, purification by flash chromatography on silica gel (EtOAc/petroleum ether = 1/8–1/5) gave product **5c**: 40.1 mg, as a white solid, yield 86%;  $[\alpha]_D^{20}$ : +62.3 ( $c$  = 0.41 in  $CHCl_3$ ); 90.5:9.5 er, determined by HPLC analysis [Daicel Chiralpak AD-H, *n*-hexane/*i*-PrOH = 60/40, 1.0 mL min<sup>-1</sup>,  $\lambda$  = 254 nm]:  $t$  (major) = 5.98 min,  $t$  (minor) = 7.72 min; <sup>1</sup>H NMR (600 MHz,  $CDCl_3$ ):  $\delta$  (ppm) 7.69 (d,  $J$  = 7.8 Hz, 1H), 7.56–7.53 (m, 2H), 7.47–7.42 (m, 4H), 7.26–7.25 (m, 1H),

7.17–7.15 (m, 1H), 6.94 (d,  $J = 7.8$  Hz, 1H), 5.94 (dd,  $J = 12.0, 7.2$  Hz, 1H), 5.81–5.79 (m, 1H), 5.37–5.26 (m, 3H), 4.38–4.36 (m, 2H), 3.55–3.53 (m, 1H), 3.32–3.30 (m, 1H), 2.93–2.91 (m, 1H), 2.48 (dd,  $J = 19.2, 9.0$  Hz, 1H), 2.33–2.31 (m, 1H), 1.82–1.80 (m, 1H);  $^{13}\text{C}$  NMR (150 MHz,  $\text{CDCl}_3$ ):  $\delta$  (ppm) 212.1, 172.0, 142.7, 131.8, 131.2, 130.1, 129.9, 129.5, 125.0, 124.5, 124.3, 118.6, 111.6, 110.4, 84.2, 52.7, 48.7, 48.3, 43.2, 39.8, 38.5, 38.2, 22.6; ESI-HRMS: calcd. for  $\text{C}_{27}\text{H}_{22}\text{N}_4\text{O}_4 + \text{Na}^+$  489.1533, found 489.1532.

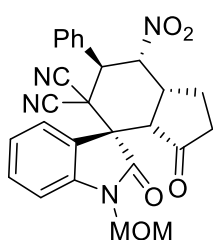

**Synthesis of 5d:** 2-Cyclopentenone **1a** (16.4 mg, 0.2 mmol), 2-(1-(methoxymethyl)-2-oxoindolin-3-ylidene)malononitrile (23.9 mg, 0.1 mmol), PTC **C2** (9.3 mg, 0.02 mmol), 2-mercaptobenzoic acid **T1** (6.2 mg, 0.04 mmol) and  $\text{K}_2\text{CO}_3$  (8.3 mg, 0.06 mmol) were stirred in distilled toluene (1.0 mL) at rt for 24 h. Then (*E*)- $\beta$ -nitrostyrene **4a** (14.9 mg, 0.1 mmol) was added and the reaction

was stirred at 60 °C for 4 h. After completion, purification by flash chromatography on silica gel (EtOAc/petroleum ether = 1/8–1/5) gave product **5d**: 38.5 mg, as a white solid, yield 82%;  $[\alpha]_{\text{D}}^{20}$ : +45.6 ( $c = 0.35$  in  $\text{CHCl}_3$ ); 89.5:10.5 er, determined by HPLC analysis [Daicel Chiralpak AD-H, *n*-hexane/*i*-PrOH = 60/40, 1.0 mL min $^{-1}$ ,  $\lambda = 254$  nm]:  $t$  (major) = 6.16 min,  $t$  (minor) = 7.44 min;  $^1\text{H}$  NMR (600 MHz,  $\text{CDCl}_3$ ):  $\delta$  (ppm) 7.71 (d,  $J = 8.8$  Hz, 1H), 7.55–7.53 (m, 2H), 7.49 (t,  $J = 8.8$  Hz, 1H), 7.45–7.43 (m, 3H), 7.29 (t,  $J = 8.8$  Hz, 1H), 7.18 (d,  $J = 8.8$  Hz, 1H), 5.95 (dd,  $J = 12.6, 7.2$  Hz, 1H), 5.29 (d,  $J = 12.6$  Hz, 1H), 5.16 (dd,  $J = 20.4, 11.4$  Hz, 2H), 3.56–3.54 (m, 1H), 3.36 (s, 3H), 3.34–3.32 (m, 1H), 2.90–2.88 (m, 1H), 2.47 (dd,  $J = 19.2, 9.0$  Hz, 1H), 2.35–2.33 (m, 1H), 1.82–1.80 (m, 1H);  $^{13}\text{C}$  NMR (150 MHz,  $\text{CDCl}_3$ ):  $\delta$  (ppm) 212.3, 173.2, 142.0, 131.7, 131.5, 130.1, 129.5, 124.7, 124.5, 111.5, 110.9, 110.5, 84.2, 72.5, 56.8, 53.6, 48.8, 48.4, 39.9, 38.4, 38.4, 22.6; ESI-HRMS: calcd. for  $\text{C}_{26}\text{H}_{22}\text{N}_4\text{O}_5 + \text{Na}^+$  493.1482, found 493.1485.

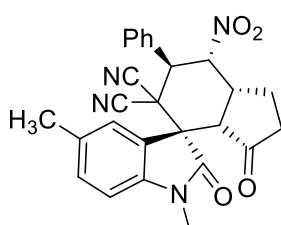

**Synthesis of 5e:** 2-Cyclopentenone **1a** (16.4 mg, 0.2 mmol), 2-(1,5-dimethyl-2-oxoindolin-3-ylidene)malononitrile (22.3 mg, 0.1 mmol), PTC **C2** (9.3 mg, 0.02 mmol), 2-mercaptobenzoic acid **T1** (6.2 mg, 0.04 mmol) and  $\text{K}_2\text{CO}_3$  (8.3 mg, 0.06 mmol) were stirred in distilled toluene (1.0 mL) at

rt for 24 h. Then (*E*)- $\beta$ -nitrostyrene **4a** (14.9 mg, 0.1 mmol) was added and the reaction was stirred at 60 °C for 4 h. After completion, purification by flash chromatography on silica gel

(EtOAc/petroleum ether = 1/8–1/5) gave product **5e**: 36.3 mg, as a white solid, yield 80%;  $[\alpha]_{\text{D}}^{20}$ : +73.4 ( $c = 0.52$  in  $\text{CHCl}_3$ ); 91:9 er, determined by HPLC analysis [Daicel Chiralpak AD-H, *n*-hexane/*i*-PrOH = 60/40,  $1.0 \text{ mL min}^{-1}$ ,  $\lambda = 254 \text{ nm}$ ]:  $t$  (major) = 6.44 min,  $t$  (minor) = 8.13 min;  $^1\text{H}$  NMR (600 MHz,  $\text{CDCl}_3$ ):  $\delta$  (ppm) 7.56–7.53 (m, 2H), 7.47 (s, 1H), 7.45–7.42 (m, 3H), 7.28 (d,  $J = 7.2 \text{ Hz}$ , 1H), 6.84 (d,  $J = 7.2 \text{ Hz}$ , 1H), 5.93 (dd,  $J = 12.6, 7.2 \text{ Hz}$ , 1H), 5.36 (d,  $J = 12.0 \text{ Hz}$ , 1H), 3.53–3.51 (m, 1H), 3.29 (d,  $J = 8.4 \text{ Hz}$ , 1H), 3.23 (s, 3H), 2.94–2.92 (m, 1H), 2.50 (dd,  $J = 19.2, 9.0 \text{ Hz}$ , 1H), 2.41 (s, 3H), 2.31–2.29 (m, 1H), 1.81–1.79 (m, 1H);  $^{13}\text{C}$  NMR (150 MHz,  $\text{CDCl}_3$ ):  $\delta$  (ppm) 212.3, 172.0, 141.0, 134.0, 131.9, 131.7, 130.6, 129.5, 125.2, 125.0, 111.6, 110.4, 109.1, 84.3, 53.1, 48.5, 48.4, 39.7, 38.5, 38.3, 27.0, 22.6, 21.4; ESI-HRMS: calcd. for  $\text{C}_{26}\text{H}_{22}\text{N}_4\text{O}_4 + \text{Na}^+$  477.1533, found 477.1532.

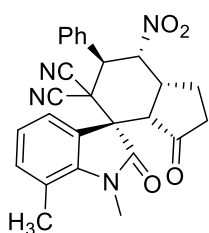

**Synthesis of 5f:** 2-Cyclopentenone **1a** (16.4 mg, 0.2 mmol), 2-(1,7-dimethyl-2-oxoindolin-3-ylidene)malononitrile (22.3 mg, 0.1 mmol), PTC **C2** (9.3 mg, 0.02 mmol), 2-mercaptobenzoic acid **T1** (6.2 mg, 0.04 mmol) and  $\text{K}_2\text{CO}_3$  (8.3 mg, 0.06 mmol) were stirred in distilled toluene (1.0 mL) at rt for 24 h. Then (*E*)- $\beta$ -nitrostyrene **4a** (14.9 mg, 0.1 mmol) was added and the reaction was stirred at 60

$^{\circ}\text{C}$  for 4 h. After completion, purification by flash chromatography on silica gel (EtOAc/petroleum ether = 1/8–1/5) gave product **5f**: 38.6 mg, as a white solid, yield 85%;  $[\alpha]_{\text{D}}^{20}$ : +61.7 ( $c = 0.45$  in  $\text{CHCl}_3$ ); 92:8 er, determined by HPLC analysis [Daicel Chiralpak AD-H, *n*-hexane/*i*-PrOH = 60/40,  $1.0 \text{ mL min}^{-1}$ ,  $\lambda = 254 \text{ nm}$ ]:  $t$  (major) = 8.04 min,  $t$  (minor) = 9.47 min;  $^1\text{H}$  NMR (600 MHz,  $\text{CDCl}_3$ ):  $\delta$  (ppm) 7.54–7.50 (m, 3H), 7.44–7.40 (m, 3H), 7.20 (d,  $J = 7.8 \text{ Hz}$ , 1H), 7.13 (t,  $J = 7.2 \text{ Hz}$ , 1H), 5.93 (dd,  $J = 12.6, 7.2 \text{ Hz}$ , 1H), 5.36 (d,  $J = 12.0 \text{ Hz}$ , 1H), 3.54–3.49 (m, 4H), 3.29–3.26 (m, 1H), 2.95–2.93 (m, 1H), 2.59 (s, 3H), 2.50 (dd,  $J = 19.2, 9.0 \text{ Hz}$ , 1H), 2.31–2.28 (m, 1H), 1.81–1.78 (m, 1H);  $^{13}\text{C}$  NMR (150 MHz,  $\text{CDCl}_3$ ):  $\delta$  (ppm) 212.4, 172.9, 141.2, 135.2, 131.8, 130.0, 129.5, 125.6, 124.0, 122.3, 121.0, 111.6, 110.5, 84.2, 52.6, 48.7, 48.5, 39.8, 38.5, 38.3, 30.5, 22.6, 19.1; ESI-HRMS: calcd. for  $\text{C}_{26}\text{H}_{22}\text{N}_4\text{O}_4 + \text{Na}^+$  477.1533, found 477.1534.

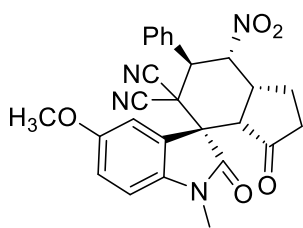

**Synthesis of 5g:** 2-Cyclopentenone **1a** (16.4 mg, 0.2 mmol), 2-(1-methyl-2-oxoindolin-3-ylidene)malononitrile (23.9 mg, 0.1 mmol), PTC **C2** (9.3 mg, 0.02 mmol), 2-mercaptobenzoic acid **T1** (6.2 mg, 0.04 mmol) and  $K_2CO_3$  (8.3 mg, 0.06 mmol) were stirred in distilled toluene (1.0 mL) at rt

for 24 h. Then (*E*)- $\beta$ -nitrostyrene **4a** (14.9 mg, 0.1 mmol) was added and the reaction was stirred at 60 °C for 4 h. After completion, purification by flash chromatography on silica gel (EtOAc/petroleum ether = 1/8–1/5) gave product **5g**: 38.5 mg, as a white solid, yield 82%;  $[\alpha]_D^{20}$ : +87.2 ( $c$  = 0.48 in  $CHCl_3$ ); 96:4 er, determined by HPLC analysis [Daicel Chiralpak AD-H, *n*-hexane/*i*-PrOH = 60/40, 1.0 mL min<sup>-1</sup>,  $\lambda$  = 254 nm]:  $t$  (major) = 11.23 min,  $t$  (minor) = 12.74 min; <sup>1</sup>H NMR (600 MHz,  $CDCl_3$ ):  $\delta$  (ppm) 7.55–7.53 (m, 2H), 7.47–7.43 (m, 3H), 7.28 (s, 1H), 7.00 (t,  $J$  = 6.6 Hz, 1H), 6.86 (d,  $J$  = 6.6 Hz, 1H), 5.93 (dd,  $J$  = 12.6, 7.2 Hz, 1H), 5.37 (d,  $J$  = 12.6 Hz, 1H), 3.84 (s, 3H), 3.57–3.55 (m, 1H), 3.29–3.27 (m, 1H), 3.24 (s, 3H), 2.95–2.93 (m, 1H), 2.52 (dd,  $J$  = 19.2, 9.0 Hz, 1H), 2.32–2.30 (m, 1H), 1.83–1.80 (m, 1H); <sup>13</sup>C NMR (150 MHz,  $CDCl_3$ ):  $\delta$  (ppm) 212.2, 171.7, 156.9, 136.6, 131.8, 130.0, 129.5, 126.2, 115.5, 111.9, 111.5, 110.3, 109.9, 84.2, 55.8, 53.3, 48.5, 48.4, 39.7, 38.4, 38.3, 27.1, 22.6; ESI-HRMS: calcd. for  $C_{26}H_{22}N_4O_5 + Na^+$  493.1482, found 493.1485.

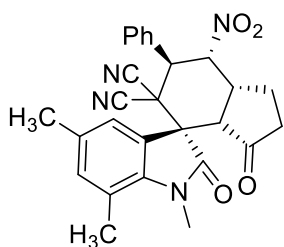

**Synthesis of 5h:** 2-Cyclopentenone **1a** (16.4 mg, 0.2 mmol), 2-(1,5,7-trimethyl-2-oxoindolin-3-ylidene)malononitrile (23.7 mg, 0.1 mmol), PTC **C2** (9.3 mg, 0.02 mmol), 2-mercaptobenzoic acid **T1** (6.2 mg, 0.04 mmol) and  $K_2CO_3$  (8.3 mg, 0.06 mmol) were stirred in distilled toluene (1.0 mL) at

rt for 24 h. Then (*E*)- $\beta$ -nitrostyrene **4a** (14.9 mg, 0.1 mmol) was added and the reaction was stirred at 60 °C for 4 h. After completion, purification by flash chromatography on silica gel (EtOAc/petroleum ether = 1/8–1/5) gave product **5h**: 38.8 mg, as a white solid, yield 83%;  $[\alpha]_D^{20}$ : +72.8 ( $c$  = 0.36 in  $CHCl_3$ ); 95.5:4.5 er, determined by HPLC analysis [Daicel Chiralpak AD-H, *n*-hexane/*i*-PrOH = 60/40, 1.0 mL min<sup>-1</sup>,  $\lambda$  = 254 nm]:  $t$  (major) = 6.04 min,  $t$  (minor) = 8.03 min; <sup>1</sup>H NMR (400 MHz,  $CDCl_3$ ):  $\delta$  (ppm) 7.56–7.53 (m, 2H), 7.45–7.42 (m, 3H), 7.30 (s, 1H), 7.00 (s, 1H), 5.92 (dd,  $J$  = 12.4, 7.6 Hz, 1H), 5.37 (d,  $J$  = 12.4 Hz, 1H), 3.55–3.48 (m, 4H), 3.27–3.24 (m, 1H), 2.94–2.92 (m, 1H), 2.59 (s, 3H), 2.50–2.48 (m, 1H), 2.35 (s, 3H), 2.33–2.23 (m, 1H), 1.80–1.77 (m, 1H); <sup>13</sup>C NMR (150 MHz,  $CDCl_3$ ):  $\delta$  (ppm) 212.4, 172.8, 138.8, 135.7, 133.6, 131.9, 130.0, 129.4, 125.6, 122.9, 120.6, 111.5, 110.5, 84.3, 52.6, 48.8, 48.5, 39.8, 38.4, 38.3, 30.3, 22.6, 21.1, 18.9; ESI-

HRMS: calcd. for  $C_{27}H_{24}N_4O_4 + Na^+$  491.1690, found 491.1692.

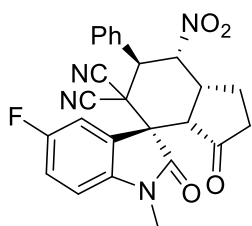

**Synthesis of 5i:** 2-Cyclopentenone **1a** (16.4 mg, 0.2 mmol), 2-(5-fluoro-1-methyl-2-oxoindolin-3-ylidene)malononitrile (22.7 mg, 0.1 mmol), PTC **C2** (9.3 mg, 0.02 mmol), 2-mercaptobenzoic acid **T1** (6.2 mg, 0.04 mmol) and  $K_2CO_3$  (8.3 mg, 0.06 mmol) were stirred in distilled toluene (1.0 mL) at rt for

24 h. Then (*E*)- $\beta$ -nitrostyrene **4a** (14.9 mg, 0.1 mmol) was added and the reaction was stirred at 60 °C for 4 h. After completion, purification by flash chromatography on silica gel (EtOAc/petroleum ether = 1/8–1/5) gave product **5i**: 39.4 mg, as a white solid, yield 86%;  $[\alpha]_D^{20}$ : +31.5 ( $c$  = 0.27 in  $CHCl_3$ ); 83:17 er, determined by HPLC analysis [Daicel Chiralpak AD-H, *n*-hexane/*i*-PrOH = 60/40, 1.0 mL min<sup>-1</sup>,  $\lambda$  = 254 nm]:  $t$  (major) = 7.81 min,  $t$  (minor) = 8.34 min;  $^1H$  NMR (600 MHz,  $CDCl_3$ ):  $\delta$  (ppm) 7.55–7.51 (m, 2H), 7.46–7.43 (m, 4H), 7.20 (t,  $J$  = 8.6 Hz, 1H), 6.90 (d,  $J$  = 7.2 Hz, 1H), 5.92 (dd,  $J$  = 12.6, 7.2 Hz, 1H), 5.35 (d,  $J$  = 12.6 Hz, 1H), 3.55–3.53 (m, 1H), 3.25–3.23 (m, 4H), 2.94–2.92 (m, 1H), 2.50 (dd,  $J$  = 19.2, 9.0 Hz, 1H), 2.33–2.31 (m, 1H), 1.82–1.80 (m, 1H);  $^{13}C$  NMR (150 MHz,  $CDCl_3$ ):  $\delta$  (ppm) 212.1, 171.9, 159.8 (d,  $^1J_{FC}$  = 240.7 Hz), 139.5, 131.7 (d,  $^3J_{FC}$  = 7.8 Hz), 130.2, 129.6, 129.5, 126.7, 126.6, 118.0 (d,  $^2J_{FC}$  = 23.4 Hz), 113.1 (d,  $^3J_{FC}$  = 7.8 Hz), 111.5, 110.3, 110.2, 84.1, 53.3, 48.5, 48.2, 39.7, 38.4, 38.3, 27.2, 22.7; ESI-HRMS: calcd. for  $C_{25}H_{19}FN_4O_4 + Na^+$  481.1283, found 481.1285.

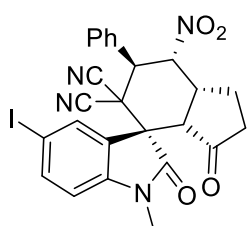

**Synthesis of 5j:** 2-Cyclopentenone **1a** (16.4 mg, 0.2 mmol), 2-(5-iodo-1-methyl-2-oxoindolin-3-ylidene)malononitrile (33.5 mg, 0.1 mmol), PTC **C2** (9.3 mg, 0.02 mmol), 2-mercaptobenzoic acid **T1** (6.2 mg, 0.04 mmol) and  $K_2CO_3$  (8.3 mg, 0.06 mmol) were stirred in distilled toluene (1.0 mL) at rt for

24 h. Then (*E*)- $\beta$ -nitrostyrene **4a** (14.9 mg, 0.1 mmol) was added and the reaction was stirred at 60 °C for 4 h. After completion, purification by flash chromatography on silica gel (EtOAc/petroleum ether = 1/8–1/5) gave product **5j**: 50.9 mg, as a white solid, yield 90%;  $[\alpha]_D^{20}$ : +39.3 ( $c$  = 0.34 in  $CHCl_3$ ); 88:12 er, determined by HPLC analysis [Daicel Chiralpak AD-H, *n*-hexane/*i*-PrOH = 60/40, 1.0 mL min<sup>-1</sup>,  $\lambda$  = 254 nm]:  $t$  (major) = 12.11 min,  $t$  (minor) = 9.03 min;  $^1H$  NMR (600 MHz,  $CDCl_3$ ):  $\delta$  (ppm) 7.94 (s, 1H), 7.81 (d,  $J$  = 7.2 Hz, 1H), 7.55–7.51 (m, 2H), 7.46–7.43 (m, 3H), 6.73 (d,  $J$  = 7.2 Hz, 1H), 5.90 (dd,  $J$  = 12.6, 7.2 Hz, 1H), 5.28 (d,  $J$  = 12.6 Hz, 1H), 3.55–3.53 (m, 1H), 3.31–3.23



(m, 4H), 2.89–2.87 (m, 1H), 2.50 (dd,  $J = 19.2, 9.0$  Hz, 1H), 2.33–2.31 (m, 1H), 1.81–1.79 (m, 1H);  $^{13}\text{C}$  NMR (150 MHz,  $\text{CDCl}_3$ ):  $\delta$  (ppm) 212.1, 171.7, 140.2, 133.3, 131.6, 130.2, 129.6, 127.4, 111.3, 110.6, 84.1, 48.3, 39.8, 38.4, 38.3, 29.7, 27.0, 22.8; ESI-HRMS: calcd. for  $\text{C}_{25}\text{H}_{19}\text{IN}_4\text{O}_4 + \text{Na}^+$  589.0343, found 589.0346.

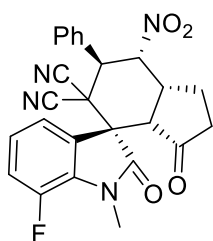

**Synthesis of 5k:** 2-Cyclopentenone **1a** (16.4 mg, 0.2 mmol), 2-(7-fluoro-1-methyl-2-oxoindolin-3-ylidene)malononitrile (22.7 mg, 0.1 mmol), PTC **C2** (9.3 mg, 0.02 mmol), 2-mercaptobenzoic acid **T1** (6.2 mg, 0.04 mmol) and  $\text{K}_2\text{CO}_3$  (8.3 mg, 0.06 mmol) were stirred in distilled toluene (1.0 mL) at rt for 24 h. Then (*E*)- $\beta$ -nitrostyrene **4a** (14.9 mg, 0.1 mmol) was added and the reaction was stirred at

60 °C for 4 h. After completion, purification by flash chromatography on silica gel (EtOAc/petroleum ether = 1/8–1/5) gave product **5k**: 39.8 mg, as a white solid, yield 87%;  $[\alpha]_{\text{D}}^{20}$ : +43.6 ( $c = 0.31$  in  $\text{CHCl}_3$ ); 89:11 er, determined by HPLC analysis [Daicel Chiralpak AD-H, *n*-hexane/*i*-PrOH = 60/40, 1.0 mL  $\text{min}^{-1}$ ,  $\lambda = 254$  nm]:  $t$  (major) = 6.36 min,  $t$  (minor) = 7.50 min;  $^1\text{H}$  NMR (600 MHz,  $\text{CDCl}_3$ ):  $\delta$  (ppm) 7.55–7.53 (m, 2H), 7.49–7.43 (m, 4H), 7.24–7.20 (m, 2H), 5.92 (dd,  $J = 12.0, 7.2$  Hz, 1H), 5.32 (d,  $J = 12.0$  Hz, 1H), 3.53–3.51 (m, 1H), 3.46 (s, 3H), 3.29–3.27 (m, 1H), 2.93–2.91 (m, 1H), 2.52 (dd,  $J = 19.2, 9.0$  Hz, 1H), 2.31–2.29 (m, 1H), 1.81–1.79 (m, 1H);  $^{13}\text{C}$  NMR (100 MHz,  $\text{CDCl}_3$ ):  $\delta$  (ppm) 212.2, 171.9, 147.8 (d,  $^1J_{\text{FC}} = 244.8$  Hz), 131.6, 130.4 (d,  $^2J_{\text{FC}} = 9.1$  Hz), 130.2, 129.5, 127.8 (d,  $^3J_{\text{FC}} = 2.9$  Hz), 124.9, 124.8, 120.3 (d,  $^3J_{\text{FC}} = 3.4$  Hz), 119.4 (d,  $^2J_{\text{FC}} = 18.9$  Hz), 111.4, 110.2, 84.1, 53.3, 48.5, 48.3, 39.7, 38.3, 38.3, 29.6, 22.7; ESI-HRMS: calcd. for  $\text{C}_{25}\text{H}_{19}\text{FN}_4\text{O}_4 + \text{Na}^+$  481.1283, found 481.1286.

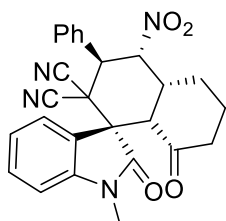

**Synthesis of 5l:** 2-Cyclohexenone **1b** (19.2 mg, 0.2 mmol), 2-(1-methyl-2-oxoindolin-3-ylidene)malononitrile **2a** (20.9 mg, 0.1 mmol), PTC **C2** (9.3 mg, 0.02 mmol), 2-mercaptobenzoic acid **T1** (6.2 mg, 0.04 mmol) and  $\text{K}_2\text{CO}_3$  (8.3 mg, 0.06 mmol) were stirred in distilled toluene (1.0 mL) at rt for 24 h. Then (*E*)- $\beta$ -nitrostyrene **4a** (14.9 mg, 0.1 mmol) was added and the reaction was stirred at 60 °C for 4 h. After completion, purification by flash chromatography on silica gel (EtOAc/petroleum ether = 1/8–1/5) gave product **5l**: 19.0 mg, as a white solid, yield 42%;  $[\alpha]_{\text{D}}^{20}$ : +25.4 ( $c = 0.22$  in  $\text{CHCl}_3$ ); 68:32 er, determined by HPLC analysis [Daicel Chiralpak AD-H, *n*-hexane/*i*-PrOH = 60/40, 1.0 mL  $\text{min}^{-1}$ ,  $\lambda$

= 254 nm]: t (major) = 9.68 min, t (minor) = 16.5 min;  $^1\text{H}$  NMR (600 MHz,  $\text{CDCl}_3$ ):  $\delta$  (ppm) 7.74 (d,  $J = 7.8$  Hz, 1H), 7.53–7.51 (m, 2H), 7.47–7.42 (m, 4H), 7.27 (t,  $J = 8.6$  Hz, 1H), 6.91 (d,  $J = 7.2$  Hz, 1H), 5.68 (dd,  $J = 12.6, 7.2$  Hz, 1H), 5.45 (d,  $J = 12.0$  Hz, 1H), 3.53–3.51 (m, 1H), 3.32 (s, 3H), 3.25–3.23 (m, 1H), 3.04–3.02 (m, 1H), 2.29–2.18 (m, 3H), 1.65–1.63 (m, 1H), 1.35–1.32 (m, 1H);  $^{13}\text{C}$  NMR (150 MHz,  $\text{CDCl}_3$ ):  $\delta$  (ppm) 203.5, 172.5, 142.4, 132.2, 131.3, 129.9, 129.4, 125.8, 124.2, 123.3, 111.5, 110.7, 109.3, 85.3, 53.3, 52.9, 49.0, 40.7, 40.4, 38.9, 27.1, 24.0, 20.7; ESI-HRMS: calcd. for  $\text{C}_{26}\text{H}_{22}\text{N}_4\text{O}_4 + \text{Na}^+$  477.1533, found 477.1532.

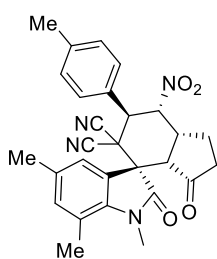

**Synthesis of 5m:** 2-Cyclopentenone **1a** (16.4 mg, 0.2 mmol), 2-(1,5,7-trimethyl-2-oxoindolin-3-ylidene)malononitrile (23.7 mg, 0.1 mmol), PTC **C2** (9.3 mg, 0.02 mmol), 2-mercaptobenzoic acid **T1** (6.2 mg, 0.04 mmol) and  $\text{K}_2\text{CO}_3$  (8.3 mg, 0.06 mmol) were stirred in distilled toluene (1.0 mL) at rt for 24 h. Then (*E*)-1-methyl-4-(2-nitrovinyl)benzene (16.3 mg, 0.1 mmol) was added and the reaction was

stirred at 60 °C for 4 h. After completion, purification by flash chromatography on silica gel (EtOAc/petroleum ether = 1/8–1/5) gave product **5m**: 39.8 mg, as a white solid, yield 82%;  $[\alpha]_{\text{D}}^{20}$ : +83.7 ( $c = 0.35$  in  $\text{CHCl}_3$ ); 93:7 er, determined by HPLC analysis [Daicel Chiralpak AD-H, *n*-hexane/*i*-PrOH = 60/40, 1.0 mL min $^{-1}$ ,  $\lambda = 254$  nm]: t (major) = 6.57 min, t (minor) = 9.30 min;  $^1\text{H}$  NMR (600 MHz,  $\text{CDCl}_3$ ):  $\delta$  (ppm) 7.41 (d,  $J = 11.4$  Hz, 2H), 7.30 (s, 1H), 7.23 (d,  $J = 11.4$  Hz, 1H), 7.0 (s, 1H), 5.90 (dd,  $J = 12.0, 7.2$  Hz, 1H), 5.32 (d,  $J = 12.0$  Hz, 1H), 3.53–3.45 (m, 4H), 3.25–3.23 (m, 1H), 2.95–2.93 (m, 1H), 2.54–2.46 (m, 4H), 2.35–2.25 (m, 7H), 1.77–1.75 (m, 1H);  $^{13}\text{C}$  NMR (150 MHz,  $\text{CDCl}_3$ ):  $\delta$  (ppm) 212.5, 172.8, 140.0, 138.8, 135.7, 133.6, 130.1, 128.8, 125.7, 123.0, 120.6, 111.6, 110.6, 84.4, 52.6, 48.9, 48.5, 39.5, 38.5, 38.3, 30.4, 22.6, 21.2, 21.1, 18.9; ESI-HRMS: calcd. for  $\text{C}_{28}\text{H}_{26}\text{N}_4\text{O}_4 + \text{Na}^+$  505.1846, found 505.1848.

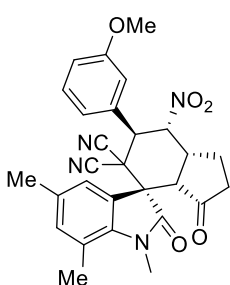

**Synthesis of 5n:** 2-Cyclopentenone **1a** (16.4 mg, 0.2 mmol), 2-(1,5,7-trimethyl-2-oxoindolin-3-ylidene)malononitrile (23.7 mg, 0.1 mmol), PTC **C2** (9.3 mg, 0.02 mmol), 2-mercaptobenzoic acid **T1** (6.2 mg, 0.04 mmol) and  $\text{K}_2\text{CO}_3$  (8.3 mg, 0.06 mmol) were stirred in distilled toluene (1.0 mL) at rt for 24 h. Then (*E*)-1-methoxy-3-(2-nitrovinyl)benzene (17.9 mg, 0.1 mmol) was added and the

reaction was stirred at 60 °C for 4 h. After completion, purification by flash chromatography on silica

gel (EtOAc/petroleum ether = 1/8–1/5) gave product **5n**: 40.8 mg, as a white solid, yield 82%;  $[\alpha]_D^{20}$ : +76.2 ( $c$  = 0.28 in  $\text{CHCl}_3$ ); 94:6 er, determined by HPLC analysis [Daicel Chiralpak AD-H,  $n$ -hexane/ $i$ -PrOH = 60/40, 1.0 mL min<sup>-1</sup>,  $\lambda$  = 254 nm]:  $t$  (major) = 6.16 min,  $t$  (minor) = 20.20 min; <sup>1</sup>H NMR (600 MHz,  $\text{CDCl}_3$ ):  $\delta$  (ppm) 7.37–7.30 (m, 2H), 7.16–7.13 (m, 1H), 7.05–7.03 (m, 2H), 6.97–6.95 (m, 1H), 5.90 (dd,  $J$  = 11.4, 7.2 Hz, 1H), 5.35 (d,  $J$  = 12.0 Hz, 1H), 3.85 (s, 3H), 3.55–3.50 (m, 4H), 3.27–3.25 (m, 1H), 2.96–2.94 (m, 1H), 2.58 (s, 3H), 2.55 (dd,  $J$  = 18.6, 8.4 Hz, 1H), 2.39 (s, 3H), 2.32–2.30 (m, 1H), 1.81–1.79 (m, 1H); <sup>13</sup>C NMR (150 MHz,  $\text{CDCl}_3$ ):  $\delta$  (ppm) 212.5, 172.8, 140.1, 138.8, 135.8, 133.4, 130.5, 125.7, 123.0, 120.6, 115.6, 84.4, 55.3, 52.7, 48.6, 39.8, 38.5, 38.3, 30.4, 22.6, 21.1, 18.9; ESI-HRMS: calcd. for  $\text{C}_{28}\text{H}_{26}\text{N}_4\text{O}_5 + \text{Na}^+$  521.1795, found 521.1796.

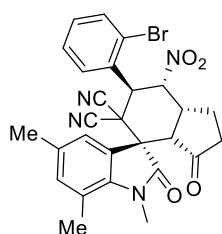

**Synthesis of 5o:** 2-Cyclopentenone **1a** (16.4 mg, 0.2 mmol), 2-(1,5,7-trimethyl-2-oxoindolin-3-ylidene)malononitrile (23.7 mg, 0.1 mmol), PTC **C2** (9.3 mg, 0.02 mmol), 2-mercaptobenzoic acid **T1** (6.2 mg, 0.04 mmol) and  $\text{K}_2\text{CO}_3$  (8.3 mg, 0.06 mmol) were stirred in distilled toluene (1.0 mL) at rt for 24 h. Then (*E*)-1-bromo-2-(2-nitrovinyl)benzene (22.7 mg, 0.1 mmol) was added and the reaction was

stirred at 60 °C for 4 h. After completion, purification by flash chromatography on silica gel (EtOAc/petroleum ether = 1/8–1/5) gave product **5o**: 40.9 mg, as a white solid, yield 75%;  $[\alpha]_D^{20}$ : +85.3 ( $c$  = 0.42 in  $\text{CHCl}_3$ ); 92.5:7.5 er, determined by HPLC analysis [Daicel Chiralpak AD-H,  $n$ -hexane/ $i$ -PrOH = 60/40, 1.0 mL min<sup>-1</sup>,  $\lambda$  = 254 nm]:  $t$  (major) = 6.15 min,  $t$  (minor) = 8.19 min; <sup>1</sup>H NMR (600 MHz,  $\text{CDCl}_3$ ):  $\delta$  (ppm) 7.74 (d,  $J$  = 8.4 Hz, 1H), 7.70 (d,  $J$  = 8.4 Hz, 1H), 7.43 (t,  $J$  = 8.4 Hz, 1H), 7.32–7.29 (m, 2H), 7.03 (s, 1H), 6.28 (d,  $J$  = 7.2 Hz, 1H), 5.88 (dd,  $J$  = 12.6, 7.2 Hz, 1H), 3.59–3.54 (m, 1H), 3.52 (s, 3H), 3.30–3.28 (m, 1H), 3.06–3.04 (m, 1H), 2.61–2.51 (m, 4H), 2.37–2.30 (m, 4H), 1.84–1.82 (m, 1H); <sup>13</sup>C NMR (150 MHz,  $\text{CDCl}_3$ ):  $\delta$  (ppm) 212.6, 172.3, 139.0, 135.8, 134.7, 133.5, 131.8, 131.1, 128.3, 127.9, 126.8, 125.5, 122.9, 120.6, 111.6, 109.8, 84.9, 52.8, 48.4, 47.9, 38.6, 38.3, 37.6, 30.4, 22.7, 21.1, 18.9; ESI-HRMS: calcd. for  $\text{C}_{27}\text{H}_{23}\text{Br}^{79}\text{N}_4\text{O}_4 + \text{Na}^+$  569.0795, found 569.0798, calcd. for  $\text{C}_{27}\text{H}_{23}\text{Br}^{81}\text{N}_4\text{O}_4 + \text{Na}^+$  571.0774, found 571.0776.

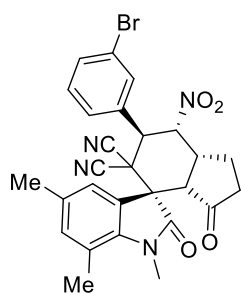

**Synthesis of 5p:** 2-Cyclopentenone **1a** (16.4 mg, 0.2 mmol), 2-(1,5,7-trimethyl-2-oxoindolin-3-ylidene)malononitrile (23.7 mg, 0.1 mmol), PTC **C2** (9.3 mg, 0.02 mmol), 2-mercaptobenzoic acid **T1** (6.2 mg, 0.04 mmol) and  $K_2CO_3$  (8.3 mg, 0.06 mmol) were stirred in distilled toluene (1.0 mL) at rt for 24 h. Then (*E*)-1-bromo-3-(2-nitrovinyl)benzene (22.7 mg, 0.1 mmol) was added and the reaction was stirred at 60 °C for 4 h. After completion, purification by flash chromatography on silica gel (EtOAc/petroleum ether = 1/8–1/5) gave product **5p**: 41.5 mg, as a white solid, yield 76%;  $[\alpha]_D^{20}$ : +70.0 ( $c = 0.34$  in  $CHCl_3$ ); 94:6 er, determined by HPLC analysis [Daicel Chiralpak AD-H, *n*-hexane/*i*-PrOH = 60/40, 1.0 mL min<sup>-1</sup>,  $\lambda = 254$  nm]:  $t$  (major) = 5.60 min,  $t$  (minor) = 8.60 min; <sup>1</sup>H NMR (600 MHz,  $CDCl_3$ ):  $\delta$  (ppm) 7.69 (s, 1H), 7.59–7.57 (m, 1H), 7.52–7.50 (m, 1H), 7.35–7.33 (m, 2H), 7.04 (s, 1H), 5.86 (dd,  $J = 12.6, 7.2$  Hz, 1H), 5.39 (d,  $J = 12.6$  Hz, 1H), 3.56–3.53 (m, 4H), 3.27–3.25 (m, 1H), 2.93–2.91 (m, 1H), 2.58 (s, 3H), 2.52 (dd,  $J = 19.2, 9.0$  Hz, 1H), 2.40–2.38 (s, 3H), 2.37–2.27 (m, 1H), 1.81–1.79 (m, 1H); <sup>13</sup>C NMR (150 MHz,  $CDCl_3$ ):  $\delta$  (ppm) 212.2, 172.7, 138.6, 135.9, 134.3, 133.7, 133.3, 130.9, 125.5, 123.5, 122.9, 120.7, 111.3, 110.3, 84.2, 52.5, 48.5, 48.5, 39.4, 38.4, 38.3, 30.4, 22.6, 21.1, 18.9; ESI-HRMS: calcd. for  $C_{27}H_{23}Br^{79}N_4O_4+Na^+$  569.0795, found 569.0796, calcd. for  $C_{27}H_{23}Br^{81}N_4O_4+Na^+$  571.0774, found 571.0773.

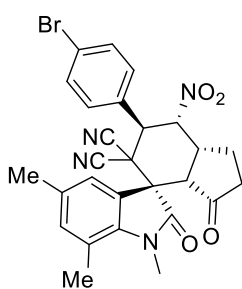

**Synthesis of 5q:** 2-Cyclopentenone **1a** (16.4 mg, 0.2 mmol), 2-(1,5,7-trimethyl-2-oxoindolin-3-ylidene)malononitrile (23.7 mg, 0.1 mmol), PTC **C2** (9.3 mg, 0.02 mmol), 2-mercaptobenzoic acid **T1** (6.2 mg, 0.04 mmol) and  $K_2CO_3$  (8.3 mg, 0.06 mmol) were stirred in distilled toluene (1.0 mL) at rt for 24 h. Then (*E*)-1-bromo-4-(2-nitrovinyl)benzene (22.7 mg, 0.1 mmol) was added and the reaction was stirred at 60 °C for 4 h. After completion, purification by flash chromatography on silica gel (EtOAc/petroleum ether = 1/8–1/5) gave product **5q**: 42.6 mg, as a white solid, yield 78%;  $[\alpha]_D^{20}$ : +75.8 ( $c = 0.37$  in  $CHCl_3$ ); 93.5:6.5 er, determined by HPLC analysis [Daicel Chiralpak AD-H, *n*-hexane/*i*-PrOH = 60/40, 1.0 mL min<sup>-1</sup>,  $\lambda = 254$  nm]:  $t$  (major) = 15.87 min,  $t$  (minor) = 17.88 min; <sup>1</sup>H NMR (600 MHz,  $CDCl_3$ ):  $\delta$  (ppm) 7.58 (d,  $J = 8.4$  Hz, 1H), 7.41 (d,  $J = 8.4$  Hz, 1H), 7.29 (s, 1H), 7.01 (s, 1H), 5.85 (dd,  $J = 12.0, 7.2$  Hz, 1H), 5.36 (d,  $J = 12.0$  Hz, 1H), 3.56–3.45 (m, 4H), 3.25–3.23 (m, 1H), 2.93–2.91 (m, 1H), 2.59–2.46 (m, 4H), 2.35–2.23 (m, 4H),

1.80–1.78 (m, 1H);  $^{13}\text{C}$  NMR (100 MHz,  $\text{CDCl}_3$ ):  $\delta$  (ppm) 212.2, 172.7, 138.7, 135.8, 133.7, 132.7, 131.0, 125.5, 124.4, 122.9, 120.7, 111.4, 110.4, 84.2, 52.5, 48.5, 48.4, 39.4, 38.3, 38.2, 30.3, 22.5, 21.1, 18.9; ESI-HRMS: calcd. for  $\text{C}_{27}\text{H}_{23}\text{Br}^{79}\text{N}_4\text{O}_4+\text{Na}^+$  569.0795, found 569.0797, calcd. for  $\text{C}_{27}\text{H}_{23}\text{Br}^{81}\text{N}_4\text{O}_4+\text{Na}^+$  571.0774, found 571.0775.

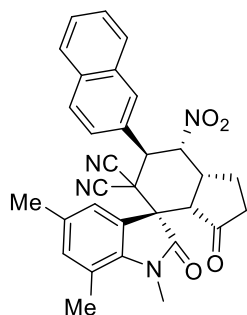

**Synthesis of 5r:** 2-Cyclopentenone **1a** (16.4 mg, 0.2 mmol), 2-(1,5,7-trimethyl-2-oxoindolin-3-ylidene)malononitrile (23.7 mg, 0.1 mmol), PTC **C2** (9.3 mg, 0.02 mmol), 2-mercaptobenzoic acid **T1** (6.2 mg, 0.04 mmol) and  $\text{K}_2\text{CO}_3$  (8.3 mg, 0.06 mmol) were stirred in distilled toluene (1.0 mL) at rt for 24 h. Then (*E*)-2-(2-nitrovinyl)naphthalene (19.9 mg, 0.1 mmol) was added and the reaction was stirred at 60 °C for 4 h. After completion, purification by flash

chromatography on silica gel (EtOAc/petroleum ether = 1/8–1/5) gave product **5r**: 36.7 mg, as a white solid, yield 71%;  $[\alpha]_{\text{D}}^{20}$ : +68.5 ( $c$  = 0.29 in  $\text{CHCl}_3$ ); 94:6 er, determined by HPLC analysis [Daicel Chiralpak AD-H, *n*-hexane/*i*-PrOH = 60/40, 1.0 mL min $^{-1}$ ,  $\lambda$  = 254 nm]:  $t$  (major) = 8.00 min,  $t$  (minor) = 17.7 min;  $^1\text{H}$  NMR (600 MHz,  $\text{CDCl}_3$ ):  $\delta$  (ppm) 8.06 (s, 1H), 7.92–7.90 (m, 2H), 7.87–7.85 (m, 1H), 7.64–7.62 (m, 1H), 7.56–7.54 (m, 2H), 7.35 (s, 1H), 7.03 (s, 1H), 6.08 (dd,  $J$  = 12.0, 7.2 Hz, 1H), 5.58 (d,  $J$  = 12.0 Hz, 1H), 3.58–3.56 (m, 1H), 3.53 (s, 3H), 3.33–3.31 (m, 1H), 3.03–3.01 (m, 1H), 2.56–2.51 (m, 4H), 2.38–2.30 (m, 4H), 1.83–1.81 (m, 1H);  $^{13}\text{C}$  NMR (150 MHz,  $\text{CDCl}_3$ ):  $\delta$  (ppm) 212.4, 172.9, 138.9, 135.8, 133.8, 133.7, 133.2, 129.5, 128.4, 127.7, 127.2, 126.8, 125.7, 123.0, 120.7, 111.7, 110.6, 84.6, 52.8, 48.8, 48.6, 39.9, 38.6, 38.4, 30.4, 22.7, 21.1, 18.9; ESI-HRMS: calcd. for  $\text{C}_{31}\text{H}_{26}\text{N}_4\text{O}_4+\text{Na}^+$  541.1846, found 541.1845.

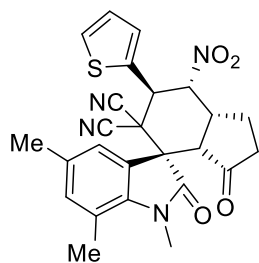

**Synthesis of 5s:** 2-Cyclopentenone **1a** (16.4 mg, 0.2 mmol), 2-(1,5,7-trimethyl-2-oxoindolin-3-ylidene)malononitrile (23.7 mg, 0.1 mmol), PTC **C2** (9.3 mg, 0.02 mmol), 2-mercaptobenzoic acid **T1** (6.2 mg, 0.04 mmol) and  $\text{K}_2\text{CO}_3$  (8.3 mg, 0.06 mmol) were stirred in distilled toluene (1.0 mL) at rt for 24 h. Then (*E*)-2-(2-nitrovinyl)thiophene (15.5 mg, 0.1 mmol) was added and

the reaction was stirred at 60 °C for 4 h. After completion, purification by flash chromatography on silica gel (EtOAc/petroleum ether = 1/8–1/5) gave product **5s**: 35.1 mg, as a white solid, yield 74%;  $[\alpha]_{\text{D}}^{20}$ : +72.2 ( $c$  = 0.31 in  $\text{CHCl}_3$ ); 92:8 er, determined by HPLC analysis [Daicel Chiralpak AD-H,

*n*-hexane/*i*-PrOH = 60/40, 1.0 mL min<sup>-1</sup>, λ = 254 nm]: t (major) = 6.20 min, t (minor) = 8.33 min; <sup>1</sup>H NMR (600 MHz, CDCl<sub>3</sub>): δ (ppm) 7.39–7.35 (m, 2H), 7.31 (s, 1H), 7.06 (t, *J* = 8.0 Hz, 1H), 7.01 (s, 1H), 5.77 (dd, *J* = 12.0, 7.2 Hz, 1H), 5.67 (d, *J* = 12.0 Hz, 1H), 3.56–3.44 (m, 4H), 3.26–3.24 (m, 1H), 2.90 (s, 1H), 2.54–2.44 (m, 4H), 2.35–2.22 (m, 4H), 1.78–1.76 (m, 1H); <sup>13</sup>C NMR (150 MHz, CDCl<sub>3</sub>): δ (ppm) 212.2, 172.7, 138.8, 135.8, 133.8, 133.7, 128.7, 127.5, 127.4, 125.6, 122.9, 120.7, 111.7, 110.6, 86.1, 52.6, 49.4, 48.4, 38.5, 38.2, 36.6, 30.4, 22.7, 21.1, 18.9; ESI-HRMS: calcd. for C<sub>25</sub>H<sub>22</sub>N<sub>4</sub>O<sub>4</sub>S+Na<sup>+</sup> 497.1254, found 497.1255.

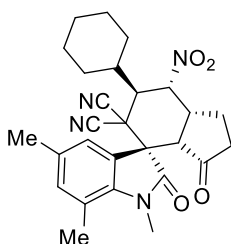

**Synthesis of 5t:** 2-Cyclopentenone **1a** (16.4 mg, 0.2 mmol), 2-(1,5,7-trimethyl-2-oxoindolin-3-ylidene)malononitrile (23.7 mg, 0.1 mmol), PTC **C2** (9.3 mg, 0.02 mmol), 2-mercaptobenzoic acid **T1** (6.2 mg, 0.04 mmol) and K<sub>2</sub>CO<sub>3</sub> (8.3 mg, 0.06 mmol) were stirred in distilled toluene (1.0 mL) at rt for 24 h. Then (*E*)-(2-nitrovinyl)cyclohexane (15.5 mg, 0.1 mmol) was added and the reaction was

stirred at 60 °C for 4 h. After completion, purification by flash chromatography on silica gel (EtOAc/petroleum ether = 1/8–1/5) gave product **5t**: 34.1 mg, as a white solid, yield 72%; [α]<sub>D</sub><sup>20</sup>: +83.4 (*c* = 0.43 in CHCl<sub>3</sub>); 92.5:7.5 er, determined by HPLC analysis [Daicel Chiralpak AD-H, *n*-hexane/*i*-PrOH = 60/40, 1.0 mL min<sup>-1</sup>, λ = 254 nm]: t (major) = 4.70 min, t (minor) = 5.94 min; <sup>1</sup>H NMR (600 MHz, CDCl<sub>3</sub>): δ (ppm) 7.27 (s, 1H), 7.01 (s, 1H), 5.40 (dd, *J* = 11.4, 6.6 Hz, 1H), 4.01 (d, *J* = 11.4 Hz, 1H), 3.44 (s, 3H), 3.31–3.29 (m, 1H), 3.09–3.07 (m, 1H), 2.81–2.79 (m, 1H), 2.59 (s, 3H), 2.43–2.35 (m, 4H), 2.23–2.21 (m, 1H), 1.99–1.92 (m, 2H), 1.83–1.55 (m, 6H), 1.31–1.14 (m, 4H); <sup>13</sup>C NMR (150 MHz, CDCl<sub>3</sub>): δ (ppm) 212.5, 172.5, 139.0, 135.7, 133.5, 125.8, 122.8, 120.5, 112.2, 111.8, 83.9, 52.2, 48.3, 47.3, 41.8, 38.4, 38.0, 33.0, 30.3, 28.6, 26.9, 25.7, 23.0, 21.1, 19.0; ESI-HRMS: calcd. for C<sub>27</sub>H<sub>30</sub>N<sub>4</sub>O<sub>4</sub>+Na<sup>+</sup> 497.2159, found 497.2158.

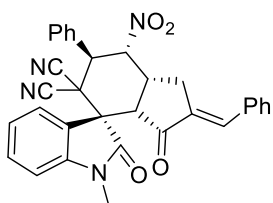

**Synthesis of 7:** (*E*)-5-benzylidenecyclopent-2-en-1-one **6** (20.4 mg, 0.12 mmol), 2-(1-methyl-2-oxoindolin-3-ylidene)malononitrile **2a** (20.9 mg, 0.1 mmol), PTC **C2** (9.3 mg, 0.02 mmol), 2-mercaptobenzoic acid **T1** (6.2 mg, 0.04 mmol) and K<sub>2</sub>CO<sub>3</sub> (8.3 mg, 0.06 mmol) were dissolved in distilled

toluene (1.0 mL). The mixture was stirred at 25 °C for 12 h. Then (*E*)-(2-nitrovinyl)benzene **4a** (14.9 mg, 0.1 mmol) was added and the reaction was moved to 50 °C for 4 h. After completion, purification

by flash chromatography on silica gel (EtOAc/petroleum ether = 1/8–1/5) gave product **7**: 48.6 mg, as a white solid, yield 92%;  $[\alpha]_{\text{D}}^{20}$ : +25.6 ( $c = 0.27$  in  $\text{CHCl}_3$ ); 72:28 er, determined by HPLC analysis [Daicel Chiralpak AD-H,  $n$ -hexane/ $i$ -PrOH = 60/40,  $1.0 \text{ mL min}^{-1}$ ,  $\lambda = 254 \text{ nm}$ ]:  $t$  (major) = 7.42 min,  $t$  (minor) = 8.78 min;  $^1\text{H NMR}$  (600 MHz,  $\text{CDCl}_3$ ):  $\delta$  (ppm) 7.78 (d,  $J = 8.4 \text{ Hz}$ , 1H), 7.60–7.58 (m, 2H), 7.53–7.39 (m, 10H), 7.31 (t,  $J = 8.4 \text{ Hz}$ , 1H), 6.94 (d,  $J = 7.2 \text{ Hz}$ , 1H), 5.98 (dd,  $J = 12.0, 7.2 \text{ Hz}$ , 1H), 5.60 (d,  $J = 12.0 \text{ Hz}$ , 1H), 3.84–3.82 (m, 1H), 3.55–3.53 (m, 1H), 3.45–3.43 (m, 1H), 3.19 (s, 3H), 2.80 (dd,  $J = 19.2, 9.0 \text{ Hz}$ , 1H);  $^{13}\text{C NMR}$  (150 MHz,  $\text{CDCl}_3$ ):  $\delta$  (ppm) 199.6, 171.5, 143.4, 136.9, 134.2, 132.8, 131.8, 131.4, 131.1, 130.6, 130.2, 129.6, 129.0, 124.8, 124.6, 124.4, 111.7, 110.6, 109.4, 84.0, 53.2, 49.1, 48.2, 39.9, 36.5, 29.6, 27.0; ESI-HRMS: calcd. for  $\text{C}_{32}\text{H}_{24}\text{N}_4\text{O}_4 + \text{Na}^+$  551.1690, found 551.1693.

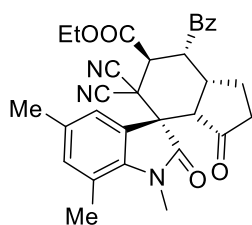

**Synthesis of 8:** 2-Cyclopentenone **1a** (16.4 mg, 0.2 mmol), 2-(1,5,7-trimethyl-2-oxoindolin-3-ylidene)malononitrile (23.7 mg, 0.1 mmol), PTC **C2** (9.3 mg, 0.02 mmol), 2-mercaptobenzoic acid **T1** (6.2 mg, 0.04 mmol) and  $\text{K}_2\text{CO}_3$  (8.3 mg, 0.06 mmol) were stirred in distilled toluene (1.0 mL) at rt for 24 h. Then

ethyl (*E*)-4-oxo-4-phenylbut-2-enoate (20.4 mg, 0.1 mmol) was added and the reaction was stirred at  $60^\circ\text{C}$  for 4 h. After completion, purification by flash chromatography on silica gel (EtOAc/petroleum ether = 1/8–1/5) gave product **8**: 40.8 mg, as a white solid, yield 78%;  $[\alpha]_{\text{D}}^{20}$ : +88.5 ( $c = 0.46$  in  $\text{CHCl}_3$ ); 94:6 er, determined by HPLC analysis [Daicel Chiralpak AD-H,  $n$ -hexane/ $i$ -PrOH = 60/40,  $1.0 \text{ mL min}^{-1}$ ,  $\lambda = 254 \text{ nm}$ ]:  $t$  (major) = 8.55 min,  $t$  (minor) = 13.81 min;  $^1\text{H NMR}$  (600 MHz,  $\text{CDCl}_3$ ):  $\delta$  (ppm) 8.06 (d,  $J = 8.4 \text{ Hz}$ , 2H), 7.68–7.66 (m, 1H), 7.56 (t,  $J = 8.4 \text{ Hz}$ , 2H), 7.36 (s, 1H), 7.02 (s, 1H), 4.89–4.87 (m, 1H), 4.70–4.68 (m, 1H), 4.29–4.27 (m, 2H), 3.46 (s, 3H), 3.11–3.09 (m, 2H), 2.60–2.51 (m, 4H), 2.37 (s, 3H), 2.31–2.29 (m, 1H), 2.04–2.02 (m, 1H), 1.45–1.43 (m, 1H), 1.27 (t,  $J = 12 \text{ Hz}$ , 3H);  $^{13}\text{C NMR}$  (150 MHz,  $\text{CDCl}_3$ ):  $\delta$  (ppm) 213.9, 197.6, 172.7, 169.1, 139.0, 135.6, 135.5, 133.9, 133.4, 129.1, 128.2, 126.1, 123.1, 120.4, 111.3, 110.9, 62.6, 52.3, 48.2, 44.5, 44.1, 40.1, 38.6, 36.7, 30.3, 23.0, 21.1, 18.9, 13.9; ESI-HRMS: calcd. for  $\text{C}_{31}\text{H}_{29}\text{N}_3\text{O}_5 + \text{Na}^+$  546.1999, found 546.1998.

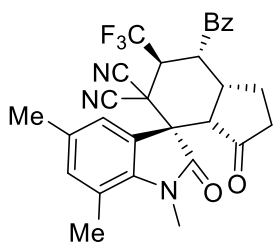

**Synthesis of 9:** 2-Cyclopentenone **1a** (16.4 mg, 0.2 mmol), 2-(1,5,7-trimethyl-2-oxoindolin-3-ylidene)malononitrile (23.7 mg, 0.1 mmol), PTC **C2** (9.3 mg, 0.02 mmol), 2-mercaptobenzoic acid **T1** (6.2 mg, 0.04 mmol) and  $K_2CO_3$  (8.3 mg, 0.06 mmol) were stirred in distilled toluene (1.0 mL) at rt for 24 h. Then (*E*)-4,4,4-trifluoro-1-phenylbut-2-en-1-one (20.0 mg, 0.1 mmol) was added and the reaction was stirred at 60 °C for 4 h. After completion, purification by flash chromatography on silica gel (EtOAc/petroleum ether = 1/8–1/5) gave product **9**: 31.6 mg, as a white solid, yield 61%;  $[\alpha]_D^{20}$ : +81.2 ( $c$  = 0.38 in  $CHCl_3$ ); 93:7 er, determined by HPLC analysis [Daicel Chiralpak AD-H, *n*-hexane/*i*-PrOH = 60/40, 1.0 mL min<sup>-1</sup>,  $\lambda$  = 254 nm]:  $t$  (major) = 6.06 min,  $t$  (minor) = 7.46 min;  $^1H$  NMR (600 MHz,  $CDCl_3$ ):  $\delta$  (ppm) 8.06 (d,  $J$  = 8.4 Hz, 2H), 7.70–7.68 (m, 1H), 7.58 (t,  $J$  = 8.4 Hz, 2H), 7.40 (s, 1H), 7.04 (s, 1H), 5.23–5.21 (m, 1H), 4.61–4.59 (m, 1H), 3.47 (s, 3H), 3.16–3.14 (m, 1H), 3.05–3.03 (m, 1H), 2.67–2.65 (m, 1H), 2.56 (s, 3H), 2.38 (s, 3H), 2.31–2.29 (m, 1H), 2.07–2.05 (m, 1H), 1.46–1.44 (m, 1H);  $^{13}C$  NMR (150 MHz,  $CDCl_3$ ):  $\delta$  (ppm) 212.7, 194.3, 172.3, 139.2, 135.9, 135.2, 134.3, 133.6, 129.3, 129.2, 128.6, 124.5 (q,  $J_{CF}$  = 279.2 Hz), 122.9, 111.5, 110.5, 53.4, 52.1, 47.8, 41.7 (q,  $J_{CF}$  = 28.6 Hz), 38.2, 35.9, 30.3, 29.7, 24.3, 21.1, 19.0; ESI-HRMS: calcd. for  $C_{29}H_{24}F_3N_3O_3+Na^+$  542.1662, found 542.1665.

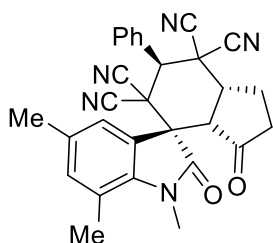

**Synthesis of 10:** 2-Cyclopentenone **1a** (16.4 mg, 0.2 mmol), 2-(1,5,7-trimethyl-2-oxoindolin-3-ylidene)malononitrile (23.7 mg, 0.1 mmol), PTC **C2** (9.3 mg, 0.02 mmol), 2-mercaptobenzoic acid **T1** (6.2 mg, 0.04 mmol) and  $K_2CO_3$  (8.3 mg, 0.06 mmol) were stirred in distilled toluene (1.0 mL) at rt for 24 h. Then 2-benzylidenemalononitrile (15.4 mg, 0.1 mmol) was added and the reaction was stirred at 60 °C for 4 h. After completion, purification by flash chromatography on silica gel (EtOAc/petroleum ether = 1/8–1/5) gave product **10**: 30.7 mg, as a white solid, yield 65%;  $[\alpha]_D^{20}$ : +93.4 ( $c$  = 0.52 in  $CHCl_3$ ); 94:6 er, determined by HPLC analysis [Daicel Chiralpak AD-H, *n*-hexane/*i*-PrOH = 60/40, 1.0 mL min<sup>-1</sup>,  $\lambda$  = 254 nm]:  $t$  (major) = 5.35 min,  $t$  (minor) = 6.45 min;  $^1H$  NMR (600 MHz,  $CDCl_3$ ):  $\delta$  (ppm) 7.91–7.88 (m, 2H), 7.58–7.55 (m, 3H), 7.33 (s, 1H), 7.03 (s, 1H), 4.75 (s, 1H), 3.96–3.94 (m, 1H), 3.52 (s, 3H), 3.19 (d,  $J$  = 18, 1H), 2.60–2.54 (m, 5H), 2.37–2.29 (m, 4H), 2.19–2.17 (m, 1H);  $^{13}C$  NMR (150 MHz,  $CDCl_3$ ):  $\delta$  (ppm) 205.2, 172.5, 135.7, 133.5, 131.3, 130.2, 129.9, 129.8, 123.5, 123.2, 120.8, 112.2, 111.9, 110.8, 110.3, 51.3, 49.9, 47.2,



46.3, 42.0, 41.9, 35.6, 30.3, 22.7, 20.9, 19.0; ESI-HRMS: calcd. for C<sub>29</sub>H<sub>23</sub>N<sub>5</sub>O<sub>2</sub>+Na<sup>+</sup> 496.1744, found 496.1745.

## 6. More screening conditions for the cross RC reaction of enone 1a with $\alpha$ -cyano chalcone 11a and annulation<sup>a</sup>

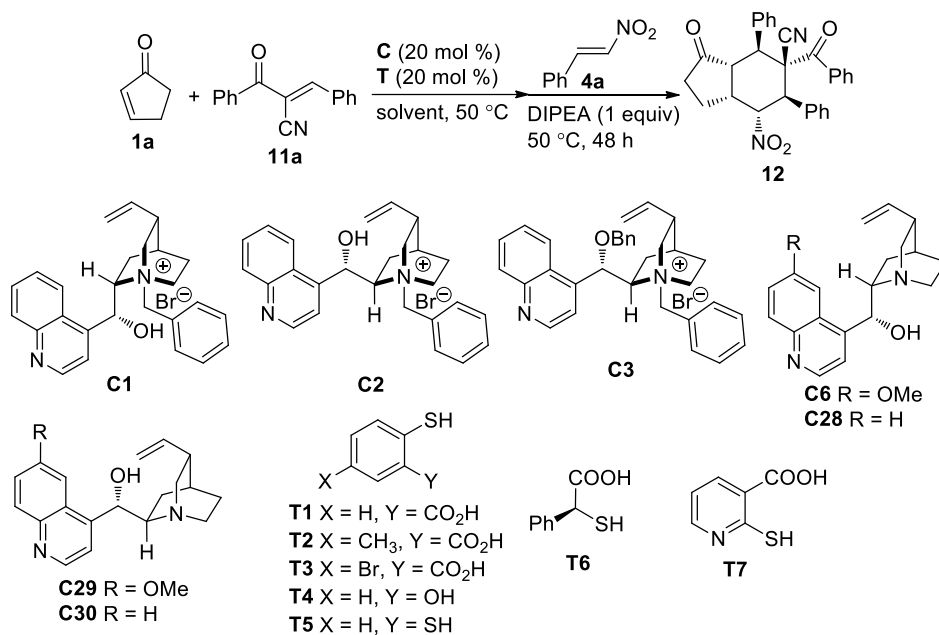

| entry          | C          | T         | solvent           | yield (%) <sup>b</sup> | er (%) <sup>c</sup> |
|----------------|------------|-----------|-------------------|------------------------|---------------------|
| 1 <sup>d</sup> | <b>C1</b>  | <b>T1</b> | toluene           | 47                     | 55.5:44.5           |
| 2 <sup>d</sup> | <b>C2</b>  | <b>T1</b> | toluene           | 45                     | 58:42               |
| 3 <sup>d</sup> | <b>C3</b>  | <b>T1</b> | toluene           | 41                     | 57:43               |
| 4              | <b>C6</b>  | <b>T1</b> | toluene           | 52                     | 85.5:14.5           |
| 5              | <b>C28</b> | <b>T1</b> | toluene           | 36                     | 62.5:37.5           |
| 6              | <b>C29</b> | <b>T1</b> | toluene           | 42                     | 63:36               |
| 7              | <b>C30</b> | <b>T1</b> | toluene           | 47                     | 54.5:45.5           |
| 8              | <b>C6</b>  | <b>T1</b> | <i>o</i> -xylene  | 79                     | 89:11               |
| 9              | <b>C6</b>  | <b>T1</b> | <i>m</i> -xylene  | 80                     | 88:12               |
| 10             | <b>C6</b>  | <b>T1</b> | PhCF <sub>3</sub> | 69                     | 83.5:16.5           |
| 11             | <b>C6</b>  | <b>T1</b> | mesitylene        | 75                     | 88:12               |
| 12             | <b>C6</b>  | <b>T1</b> | CHCl <sub>3</sub> | 62                     | 78.5:21.5           |
| 13             | <b>C6</b>  | <b>T2</b> | <i>o</i> -xylene  | 72                     | 85.5:14.5           |
| 14             | <b>C6</b>  | <b>T3</b> | <i>o</i> -xylene  | 74                     | 84.5:15.5           |

|                       |           |           |                  |     |           |
|-----------------------|-----------|-----------|------------------|-----|-----------|
| 15                    | <b>C6</b> | <b>T4</b> | <i>o</i> -xylene | 64  | 74:26     |
| 16                    | <b>C6</b> | <b>T5</b> | <i>o</i> -xylene | 42  | 57:43     |
| 17                    | <b>C6</b> | <b>T6</b> | <i>o</i> -xylene | <10 | /         |
| 18 <sup>e</sup>       | <b>C6</b> | <b>T7</b> | <i>o</i> -xylene | 51  | 51.5:48.5 |
| 19 <sup>d</sup>       | <b>C6</b> | <b>T1</b> | <i>o</i> -xylene | 80  | 90.5:9.5  |
| 20 <sup>f,g</sup>     | <b>C6</b> | <b>T1</b> | <i>o</i> -xylene | 82  | 91.5:8.5  |
| 21 <sup>f,g,h</sup>   | <b>C6</b> | <b>T1</b> | <i>o</i> -xylene | 82  | 91.5:8.5  |
| 22 <sup>f,g,h,i</sup> | <b>C6</b> | <b>T1</b> | <i>o</i> -xylene | 77  | 89:11     |

<sup>a</sup>Unless noted otherwise, reactions were performed with 2-cyclopentenone **1a** (8.6 mg, 0.1 mmol), **11a** (11.7 mg, 0.05 mmol), **C** (6.4 mg, 20 mol %), and thiol **T** (3.1 mg, 20 mol %) in solvent (0.5 mL) at 50 °C for 48–72 h. After completion, the intermediate was obtained by flash chromatography on silica gel. After that, the activated alkene **4a** (1.0 equiv), DIPEA (1.0 equiv) and *o*-xylene (0.5 mL) was added and the reaction was stirred at 50 °C for 48 h. <sup>b</sup>Isolated yield for two steps. <sup>c</sup>Determined by HPLC analysis on a chiral stationary phase; dr >19:1. <sup>d</sup>Thiol **T** (6.4 mg, 40 mol %) and K<sub>2</sub>CO<sub>3</sub> (8.3 mg, 60 mol %) were added. <sup>e</sup>Dr = 4:1. <sup>f</sup>At 30 °C for 72 h. <sup>g</sup>With 10 mol % **T1**. <sup>h</sup>At a 0.1 mmol scale. <sup>i</sup>The reaction was performed in one-pot.

## 7. General procedure for the cross RC reactions of enone **1a** with $\alpha$ -cyano chalcones **11** and annulations

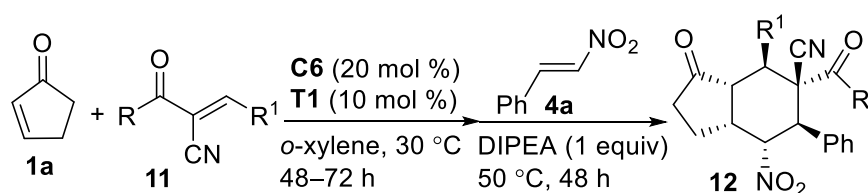

A solution of 2-cyclopentenone **1a** (0.2 mmol, 2.0 equiv),  $\alpha$ -cyano chalcone **11** (0.1 mmol, 1.0 equiv), quinine **C6** (20 mol %), thiol **T1** (10 mol %) in *o*-xylene (1.0 mL) was stirred at 30 °C for 48–72 h. The reaction was monitored by TLC. After completion, the intermediate was obtained by flash chromatography on silica gel (EtOAc/petroleum ether = 1/12–1/9). Then, the activated alkene **4a** (0.1 mmol, 1.0 equiv), *N,N*-Diisopropylethylamine (DIPEA, 0.1 mmol, 1.0 equiv) and *o*-xylene (1.0 mL) were added and the reaction was stirred at 50 °C for 48 h (monitored by TLC). After completion, the product **12** was obtained by flash chromatography on silica gel (EtOAc/petroleum

ether = 1/9–1/7).

The racemates could not be obtained by using DABCO as the catalyst. So two peaks of these enantiomers were assigned by HPLC analysis on a chiral stationary phase with the mixture of two enantiomers, which were produced by using quinine and cinchonine as the catalyst, respectively.

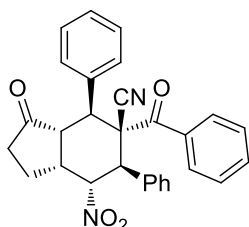

**Synthesis of 12a:** A solution of 2-cyclopentenone **1a** (16.4 mg, 0.2 mmol), (*E*)-2-benzoyl-3-phenylacrylonitrile **11a** (23.3 mg, 0.1 mmol), quinine **C6** (6.4 mg, 0.02 mmol), thiol **T1** (1.5 mg, 0.01 mmol) in *o*-xylene (1.0 mL) was stirred at 30 °C for 72 h. The reaction was monitored by TLC. After completion, the intermediate was obtained by flash chromatography on silica gel

(EtOAc/petroleum ether = 1/12–1/9). After that, the activated alkene **4a** (14.9 mg, 0.1 mmol), DIPEA (12.9 mg, 0.1 mmol) and *o*-xylene (1.0 mL) was added and the reaction were stirred at 50 °C for 48 h. After completion, purification by flash chromatography on silica gel (EtOAc/petroleum ether = 1/9–1/7) gave product **12a**: 39.0 mg, as a white solid, yield 84%;  $[\alpha]_D^{25} = +58.8$  ( $c = 0.32$  in  $\text{CHCl}_3$ ); 91.5:8.5 er, determined by HPLC analysis [Daicel chiralcel OD-H, *n*-hexane/*i*-PrOH = 60/40, 1.0 mL  $\text{min}^{-1}$ ,  $\lambda = 254$  nm]:  $t$  (minor) = 13.77 min,  $t$  (major) = 26.67 min];  $^1\text{H}$  NMR (400 MHz,  $\text{CDCl}_3$ ):  $\delta$  (ppm) 7.43–7.42 (m, 2H), 7.33–7.26 (m, 8H), 7.20 (t,  $J = 7.6$  Hz, 1H), 6.97–6.94 (m, 2H), 6.31 (d,  $J = 7.6$  Hz, 2H), 5.92 (dd,  $J = 12.8, 5.6$  Hz, 1H), 4.45 (d,  $J = 8.8$  Hz, 1H), 3.75–3.72 (m, 1H), 3.45–3.37 (m, 2H), 2.69–2.51 (m, 2H), 2.41–2.32 (m, 1H), 2.03–1.96 (m, 1H);  $^{13}\text{C}$  NMR (100 MHz,  $\text{CDCl}_3$ ):  $\delta$  (ppm) 211.6, 196.4, 137.0, 133.2, 132.7, 132.1, 129.3, 129.2, 129.0, 128.9, 127.5, 126.6, 118.0, 85.4, 62.0, 49.5, 47.4, 46.9, 39.5, 36.4, 21.1; ESI-HRMS: calcd. for  $\text{C}_{29}\text{H}_{24}\text{N}_2\text{O}_4 + \text{Na}^+$  487.1628, found 487.1630.

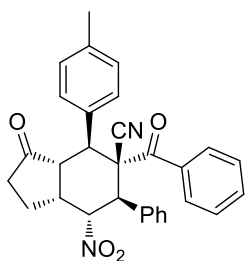

**Synthesis of 12b:** A solution of 2-cyclopentenone **1a** (16.4 mg, 0.2 mmol), (*E*)-2-benzoyl-3-(*p*-tolyl)acrylonitrile (24.7 mg, 0.1 mmol), quinine **C6** (6.4 mg, 0.02 mmol), thiol **T1** (1.5 mg, 0.01 mmol) was stirred at 30 °C for 72 h. The reaction was monitored by TLC. After completion, the intermediate was obtained by flash chromatography on silica gel (EtOAc/petroleum ether = 1/12–

1/9). After that, the activated alkene **4a** (14.9 mg, 0.1 mmol), DIPEA (12.9 mg, 0.1 mmol) and *o*-xylene (1.0 mL) were added and the reaction was stirred at 50 °C for 48 h. After completion,

purification by flash chromatography on silica gel (EtOAc/petroleum ether = 1/9–1/7) gave product **12b**: 37.3 mg, as a white solid, yield 78%;  $[\alpha]_D^{25} = +90.0$  ( $c = 0.24$  in  $\text{CHCl}_3$ ); 90.5:9.5 er, determined by HPLC analysis [Daicel chiralcel OD-H,  $n$ -hexane/ $i$ -PrOH = 60/40, 1.0 mL  $\text{min}^{-1}$ ,  $\lambda = 254$  nm]:  $t$  (minor) = 14.23 min,  $t$  (major) = 40.04 min];  $^1\text{H}$  NMR (400 MHz,  $\text{CDCl}_3$ ):  $\delta$  (ppm) 7.42–7.41 (m, 2H), 7.31–7.18 (m, 6H), 7.10–7.08 (m, 2H), 6.98–6.94 (m, 2H), 6.33 (d,  $J = 8.0$  Hz, 2H), 5.92 (dd,  $J = 12.4, 5.2$  Hz, 1H), 4.44 (d,  $J = 12.4$  Hz, 1H), 3.72–3.69 (m, 1H), 3.42–3.34 (m, 2H), 2.68–2.50 (m, 2H), 2.39–2.30 (m, 1H), 2.26 (s, 3H), 2.01–1.94 (m, 1H);  $^{13}\text{C}$  NMR (100 MHz,  $\text{CDCl}_3$ ):  $\delta$  (ppm) 211.6, 196.4, 138.7, 137.0, 132.7, 132.0, 130.1, 129.6, 129.3, 129.2, 127.5, 126.6, 118.1, 85.5, 62.1, 49.6, 47.4, 46.5, 39.6, 36.3, 21.1, 21.0; ESI-HRMS: calcd. for  $\text{C}_{30}\text{H}_{26}\text{N}_2\text{O}_4 + \text{Na}^+$  501.1785, found 501.1786.

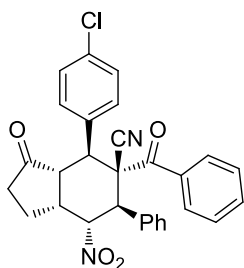

**Synthesis of 12c:** A solution of 2-cyclopentenone **1a** (16.4 mg, 0.2 mmol), (*E*)-2-benzoyl-3-(4-chlorophenyl)acrylonitrile (26.7 mg, 0.1 mmol), quinine **C6** (6.4 mg, 0.02 mmol), thiol **T1** (1.5 mg, 0.01 mmol) in *o*-xylene (1.0 mL) was stirred at 30 °C for 72 h. The reaction was monitored by TLC. After completion, the intermediate was obtained by flash chromatography on silica gel

(EtOAc/petroleum ether = 1/12–1/9). After that, the activated alkene **4a** (14.9 mg, 0.1 mmol), DIPEA (12.9 mg, 0.1 mmol) and *o*-xylene (1.0 mL) were added and the reaction was stirred at 50 °C for 48 h. After completion, purification by flash chromatography on silica gel (EtOAc/petroleum ether = 1/9–1/7) gave product **12c**: 38.8 mg, as a white solid, yield 78%;  $[\alpha]_D^{25} = +72.8$  ( $c = 0.5$  in  $\text{CHCl}_3$ ); 90:10 er, determined by HPLC analysis [Daicel chiralcel OD-H,  $n$ -hexane/ $i$ -PrOH = 60/40, 1.0 mL  $\text{min}^{-1}$ ,  $\lambda = 254$  nm]:  $t$  (minor) = 13.39 min,  $t$  (major) = 39.98 min];  $^1\text{H}$  NMR (400 MHz,  $\text{CDCl}_3$ ):  $\delta$  (ppm) 7.42–7.40 (m, 2H), 7.33–7.23 (m, 8H), 7.01 (t,  $J = 8.0$  Hz, 2H), 6.41 (d,  $J = 7.6$  Hz, 2H), 5.91 (dd,  $J = 12.8, 6.0$  Hz, 1H), 4.40 (d,  $J = 12.8$  Hz, 1H), 3.74–3.71 (m, 1H), 3.45–3.32 (m, 2H), 2.69–2.48 (m, 2H), 2.42–2.32 (m, 1H), 2.03–1.98 (m, 1H);  $^{13}\text{C}$  NMR (100 MHz,  $\text{CDCl}_3$ ):  $\delta$  (ppm) 211.5, 196.0, 136.7, 135.0, 132.6, 132.5, 131.8, 131.0, 129.4, 129.1, 129.0, 127.7, 127.7, 126.8, 117.9, 85.3, 61.7, 49.4, 47.4, 46.2, 39.5, 36.4, 21.1; ESI-HRMS: calcd. for  $\text{C}_{29}\text{H}_{23}^{35}\text{ClN}_2\text{O}_4 + \text{Na}^+$  521.1239, found 521.1240,  $\text{C}_{29}\text{H}_{23}^{37}\text{ClN}_2\text{O}_4 + \text{Na}^+$  523.1215, found 523.1217.

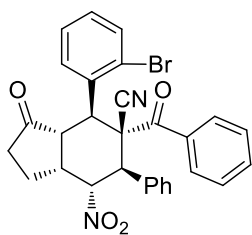

**Synthesis of 12d:** A solution of 2-cyclopentenone **1a** (16.4 mg, 0.2 mmol), (*E*)-2-benzoyl-3-(2-bromophenyl)acrylonitrile (31.0 mg, 0.1 mmol), quinine **C6** (6.4 mg, 0.02 mmol), thiol **T1** (1.5 mg, 0.01 mmol) in *o*-xylene (1.0 mL) was stirred at 30 °C for 72 h. The reaction was monitored by TLC. After completion,

the intermediate was obtained by flash chromatography on silica gel (EtOAc/petroleum ether = 1/12–1/9). After that, the activated alkene **4a** (14.9 mg, 0.1 mmol), DIPEA (12.9 mg, 0.1 mmol) and *o*-xylene (1.0 mL) were added and the reaction was stirred at 50 °C for 48 h. After completion, purification by flash chromatography on silica gel (EtOAc/petroleum ether = 1/9–1/7) gave product **12d**: 40.1 mg, as a white solid, yield 74%;  $[\alpha]_{\text{D}}^{25} = +105.7$  ( $c = 0.14$  in  $\text{CHCl}_3$ ); 92:8 er, determined by HPLC analysis [Daicel chiralcel OD-H, *n*-hexane/*i*-PrOH = 80/20, 1.0 mL min<sup>-1</sup>,  $\lambda = 254$  nm]:  $t$  (minor) = 26.49 min,  $t$  (major) = 33.03 min]; <sup>1</sup>H NMR (400 MHz,  $\text{CDCl}_3$ ):  $\delta$  (ppm) 7.89–7.85 (m, 1H), 7.55–7.47 (m, 3H), 7.36–7.29 (m, 3H), 7.25–7.20 (m, 2H), 7.13–7.09 (m, 1H), 7.02–6.98 (m, 2H), 6.43 (d,  $J = 7.6$  Hz, 2H), 5.95 (dd,  $J = 12.4$ , 6.0 Hz, 1H), 4.59 (dd,  $J = 26.0$ , 13.2 Hz, 2H), 3.43–3.35 (m, 1H), 3.14 (dd,  $J = 13.2$  Hz,  $J = 6.4$  Hz, 1H), 2.86–2.79 (m, 1H), 2.72–2.60 (m, 1H), 2.41–2.31 (m, 1H), 2.07–2.00 (m, 1H); <sup>13</sup>C NMR (100 MHz,  $\text{CDCl}_3$ ):  $\delta$  (ppm) 211.4, 194.6, 136.9, 133.5, 133.4, 132.6, 132.2, 130.2, 129.4, 129.1, 129.0, 128.1, 127.7, 126.6, 118.7, 85.4, 60.4, 51.6, 48.0, 44.2, 39.8, 36.5, 21.4; ESI-HRMS: calcd. for  $\text{C}_{29}\text{H}_{23}^{79}\text{BrN}_2\text{O}_4 + \text{Na}^+$  565.0733, found 565.0737,  $\text{C}_{29}\text{H}_{23}^{81}\text{BrN}_2\text{O}_4 + \text{Na}^+$  567.0713, found 567.0723.

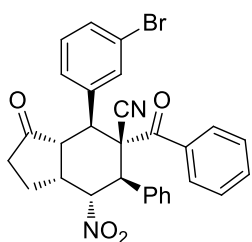

**Synthesis of 12e:** A solution of 2-cyclopentenone **1a** (16.4 mg, 0.2 mmol), (*E*)-2-benzoyl-3-(3-bromophenyl)acrylonitrile (31.0 mg, 0.1 mmol), quinine **C6** (6.4 mg, 0.02 mmol), thiol **T1** (1.5 mg, 0.01 mmol) in *o*-xylene (1.0 mL) was stirred at 30 °C for 48 h. The reaction was monitored by TLC. After completion,

the intermediate was obtained by flash chromatography on silica gel (EtOAc/petroleum ether = 1/12–1/9). After that, the activated alkene **4a** (14.9 mg, 0.1 mmol), DIPEA (12.9 mg, 0.1 mmol) and *o*-xylene (1.0 mL) were added and the reaction was stirred at 50 °C for 48 h. After completion, purification by flash chromatography on silica gel (EtOAc/petroleum ether = 1/9–1/7) gave product **12e**: 43.9 mg, as a white solid, yield 81%;  $[\alpha]_{\text{D}}^{25} = +85.0$  ( $c = 0.28$  in  $\text{CHCl}_3$ ); 90:10 er, determined by HPLC analysis [Daicel chiralcel OD-H, *n*-hexane/*i*-PrOH = 60/40, 1.0 mL min<sup>-1</sup>,  $\lambda = 254$  nm]:  $t$  (minor) = 14.70 min,  $t$  (major) = 28.45 min]; <sup>1</sup>H NMR (400 MHz,  $\text{CDCl}_3$ ):  $\delta$

(ppm) 7.43–7.23 (m, 9H), 7.16 (t,  $J = 8.0$  Hz, 1H), 7.01 (t,  $J = 8.0$  Hz, 2H), 6.45 (d,  $J = 7.6$  Hz, 2H), 5.91 (dd,  $J = 12.8, 6.0$  Hz, 1H), 4.40 (d,  $J = 12.8$  Hz, 1H), 3.70–3.66 (m, 1H), 3.45–3.32 (m, 2H), 2.67 (dd,  $J = 18.8, 8.8$  Hz, 1H), 2.58–2.47 (m, 1H), 2.42–2.33 (m, 1H), 2.04–2.00 (m, 1H);  $^{13}\text{C}$  NMR (100 MHz,  $\text{CDCl}_3$ ):  $\delta$  (ppm) 211.3, 195.9, 136.7, 133.5, 132.5, 132.1, 130.3, 129.4, 129.0, 127.7, 126.9, 122.8, 117.8, 85.2, 61.7, 49.2, 47.4, 46.4, 39.5, 36.5, 21.1; ESI-HRMS: calcd. for  $\text{C}_{29}\text{H}_{23}^{79}\text{BrN}_2\text{O}_4+\text{Na}^+$  565.0733, found 565.0733,  $\text{C}_{29}\text{H}_{23}^{81}\text{BrN}_2\text{O}_4+\text{Na}^+$  567.0713, found 567.0718.

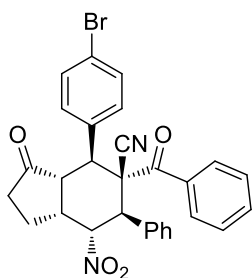

**Synthesis of 12f:** A solution of 2-cyclopentenone **1a** (16.4 mg, 0.2 mmol), (*E*)-2-benzoyl-3-(4-bromophenyl)acrylonitrile (31.0 mg, 0.1 mmol), quinine **C6** (6.4 mg, 0.02 mmol), thiol **T1** (1.5 mg, 0.01 mmol) in *o*-xylene (1.0 mL) was stirred at 30 °C for 48 h. The reaction was monitored by TLC. After completion, the intermediate was obtained by flash chromatography on silica gel

(EtOAc/petroleum ether = 1/12–1/9). After that, the activated alkene **4a** (14.9 mg, 0.1 mmol), DIPEA (12.9 mg, 0.1 mmol) and *o*-xylene (1.0 mL) were added and the reaction was stirred at 50 °C for 48 h. After completion, purification by flash chromatography on silica gel (EtOAc/petroleum ether = 1/9–1/7) gave product **12f**: 42.8 mg, as a white solid, yield 79%;  $[\alpha]_{\text{D}}^{25} = +92.0$  ( $c = 0.15$  in  $\text{CHCl}_3$ ); 96.5:3.5 er, determined by HPLC analysis [Daicel chiralcel OD-H, *n*-hexane/*i*-PrOH = 60/40, 1.0 mL  $\text{min}^{-1}$ ,  $\lambda = 254$  nm]:  $t$  (minor) = 13.98 min,  $t$  (major) = 49.31 min];  $^1\text{H}$  NMR (400 MHz,  $\text{CDCl}_3$ ):  $\delta$  (ppm) 7.43–7.41 (m, 4H), 7.33–7.21 (m, 6H), 7.01 (t,  $J = 8.0$  Hz, 2H), 6.41 (d,  $J = 8.0$  Hz, 2H), 5.91 (dd,  $J = 12.4, 5.6$  Hz, 1H), 4.40 (d,  $J = 12.4$  Hz, 1H), 3.72–3.69 (m, 1H), 3.45–3.32 (m, 2H), 2.69–2.48 (m, 2H), 2.42–2.33 (m, 1H), 2.04–1.97 (m, 1H);  $^{13}\text{C}$  NMR (100 MHz,  $\text{CDCl}_3$ ):  $\delta$  (ppm) 211.5, 196.0, 136.7, 132.5, 132.3, 132.1, 131.3, 129.4, 129.4, 129.0, 127.7, 126.8, 123.2, 117.9, 85.2, 61.6, 49.3, 47.4, 46.3, 39.5, 36.5, 21.1; ESI-HRMS: calcd. for  $\text{C}_{29}\text{H}_{23}^{79}\text{BrN}_2\text{O}_4+\text{Na}^+$  565.0733, found 565.0731,  $\text{C}_{29}\text{H}_{23}^{81}\text{BrN}_2\text{O}_4+\text{Na}^+$  567.0713, found 567.0717.

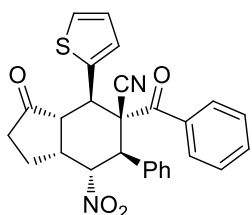

**Synthesis of 12g:** A solution of 2-cyclopentenone **1a** (16.4 mg, 0.2 mmol), (*E*)-2-benzoyl-3-(thiophen-2-yl)acrylonitrile (23.9 mg, 0.1 mmol), quinine **C6** (6.4 mg, 0.02 mmol), thiol **T1** (1.5 mg, 0.01 mmol) in *o*-xylene (1.0 mL) was stirred at 30 °C for 72 h. The reaction was monitored by TLC. After completion, the

intermediate was obtained by flash chromatography on silica gel (EtOAc/petroleum ether = 1/12–

1/9). After that, the activated alkene **4a** (14.9 mg, 0.1 mmol), DIPEA (12.9 mg, 0.1 mmol) and *o*-xylene (1.0 mL) were added and the reaction was stirred at 50 °C for 48 h. After completion, purification by flash chromatography on silica gel (EtOAc/petroleum ether = 1/9–1/7) gave product **12g**: 37.1 mg, as a white solid, yield 79%;  $[\alpha]_{\text{D}}^{25} = +35.2$  ( $c = 0.75$  in  $\text{CHCl}_3$ ); 91.5:8.5 er, determined by HPLC analysis [Daicel chiralcel OD-H, *n*-hexane/*i*-PrOH = 60/40, 1.0 mL min<sup>-1</sup>,  $\lambda = 254$  nm]:  $t$  (minor) = 18.02 min,  $t$  (major) = 53.62 min]; <sup>1</sup>H NMR (400 MHz,  $\text{CDCl}_3$ ):  $\delta$  (ppm) 7.42–7.40 (m, 2H), 7.31–7.21 (m, 5H), 7.06–7.01 (m, 3H), 6.91 (dd,  $J = 5.2$  Hz,  $J = 3.6$  Hz, 1H), 6.51 (d,  $J = 7.2$  Hz, 2H), 5.90 (dd,  $J = 12.8$ , 6.0 Hz, 1H), 4.40 (d,  $J = 12.4$  Hz, 1H), 4.01 (d,  $J = 13.2$  Hz, 1H), 3.41–3.27 (m, 2H), 2.72–2.65 (m, 1H), 2.57–2.46 (m, 1H), 2.41–2.33 (m, 1H), 2.02–1.95 (m, 1H); <sup>13</sup>C NMR (100 MHz,  $\text{CDCl}_3$ ):  $\delta$  (ppm) 210.9, 196.3, 136.9, 135.5, 132.6, 132.4, 129.4, 129.3, 128.5, 127.7, 127.0, 126.8, 126.3, 117.9, 85.2, 62.5, 51.4, 47.2, 42.7, 39.7, 36.3, 21.0; ESI-HRMS: calcd. for  $\text{C}_{27}\text{H}_{22}\text{N}_2\text{O}_4\text{S}+\text{Na}^+$  493.1192, found 493.1188.

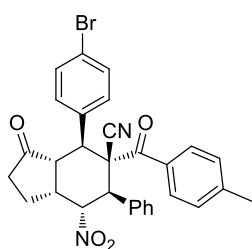

**Synthesis of 12h:** A solution of 2-cyclopentenone **1a** (16.4 mg, 0.2 mmol), (*E*)-3-(4-bromophenyl)-2-(4-methylbenzoyl)acrylonitrile (32.5 mg, 0.1 mmol), quinine **C6** (6.4 mg, 0.02 mmol), thiol **T1** (1.5 mg, 0.01 mmol) in *o*-xylene (1.0 mL) was stirred at 30 °C for 72 h. The reaction was monitored by TLC. After completion, the intermediate was obtained by flash chromatography on silica

gel (EtOAc/petroleum ether = 1/12–1/9). After that, the activated alkene **4a** (14.9 mg, 0.1 mmol), DIPEA (12.9 mg, 0.1 mmol) and *o*-xylene (1.0 mL) were added and the reaction was stirred at 50 °C for 48 h. After completion, purification by flash chromatography on silica gel (EtOAc/petroleum ether = 1/9–1/7) gave product **12h**: 45.6 mg, as a white solid, yield 82%;  $[\alpha]_{\text{D}}^{25} = +85.0$  ( $c = 0.24$  in  $\text{CHCl}_3$ ); 96:4 er, determined by HPLC analysis [Daicel chiralcel OD-H, *n*-hexane/*i*-PrOH = 60/40, 1.0 mL min<sup>-1</sup>,  $\lambda = 254$  nm]:  $t$  (minor) = 13.56 min,  $t$  (major) = 46.91 min]; <sup>1</sup>H NMR (400 MHz,  $\text{CDCl}_3$ ):  $\delta$  (ppm) 7.42–7.39 (m, 4H), 7.31–7.20 (m, 5H), 6.81 (d,  $J = 8.0$  Hz, 2H), 6.40 (d,  $J = 8.0$  Hz, 2H), 5.91 (dd,  $J = 12.8$ , 6.0 Hz, 1H), 4.40 (d,  $J = 12.8$  Hz, 1H), 3.72–3.69 (m, 1H), 3.44–3.31 (m, 2H), 2.68–2.48 (m, 2H), 2.42–2.32 (m, 1H), 2.19 (s, 3H), 2.03–1.96 (m, 1H); <sup>13</sup>C NMR (100 MHz,  $\text{CDCl}_3$ ):  $\delta$  (ppm) 211.6, 195.3, 143.7, 134.1, 132.6, 132.3, 132.0, 131.2, 129.4, 129.3, 129.0, 128.5, 127.1, 123.1, 118.0, 85.2, 61.4, 49.3, 47.3, 46.1, 39.5, 36.5, 21.5, 21.1; ESI-HRMS: calcd. for  $\text{C}_{30}\text{H}_{25}^{79}\text{BrN}_2\text{O}_4+\text{Na}^+$  579.0890, found 579.0891,  $\text{C}_{30}\text{H}_{25}^{81}\text{BrN}_2\text{O}_4+\text{Na}^+$  581.0869, found 581.0873.

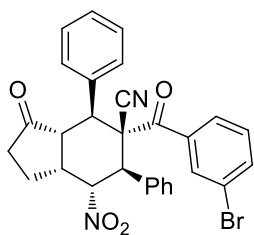

**Synthesis of 12i:** A solution of 2-cyclopentenone **1a** (16.4 mg, 0.2 mmol), (*E*)-2-(3-bromobenzoyl)-3-phenylacrylonitrile (31.0 mg, 0.1 mmol), quinine **C6** (6.4 mg, 0.02 mmol), thiol **T1** (1.5 mg, 0.01 mmol) in *o*-xylene (1.0 mL) was stirred at 30 °C for 48 h. The reaction was monitored by TLC. After completion, the intermediate was obtained by flash chromatography on silica gel

(EtOAc/petroleum ether = 1/12–1/9). After that, the activated alkene **4a** (14.9 mg, 0.1 mmol), DIPEA (12.9 mg, 0.1 mmol) and *o*-xylene (1.0 mL) were added and the reaction was stirred at 50 °C for 48 h. After completion, purification by flash chromatography on silica gel (EtOAc/petroleum ether = 1/9–1/7) gave product **12i**: 45.0 mg, as a white solid, yield 83%; 17:1 dr,  $[\alpha]_{\text{D}}^{25} = +55.5$  ( $c = 0.22$  in  $\text{CHCl}_3$ ); 95:5 er, determined by HPLC analysis [Daicel chiralcel OD-H, *n*-hexane/*i*-PrOH = 80/20, 1.0 mL min<sup>-1</sup>,  $\lambda = 254$  nm]:  $t$  (minor) = 27.17 min,  $t$  (major) = 54.73 min]; <sup>1</sup>H NMR (400 MHz,  $\text{CDCl}_3$ ):  $\delta$  (ppm) 7.41–7.33 (m, 11H), 6.82 (t,  $J = 8.0$  Hz, 1H), 6.23 (s, 1H), 6.09 (d,  $J = 7.6$  Hz, 1H), 5.90 (dd,  $J = 12.4, 5.2$  Hz, 1H), 4.41 (d,  $J = 12.8$  Hz, 1H), 3.71–3.68 (m, 1H), 3.43–3.37 (m, 2H), 2.66 (dd,  $J = 18.8, 8.8$  Hz, 1H), 2.60–2.49 (m, 1H), 2.42–2.32 (m, 1H), 2.04–1.97 (m, 1H); <sup>13</sup>C NMR (100 MHz,  $\text{CDCl}_3$ ):  $\delta$  (ppm) 211.4, 195.5, 138.5, 134.9, 134.9, 133.0, 132.5, 129.5, 129.3, 129.2, 129.1, 124.6, 124.6, 121.8, 117.7, 85.3, 62.5, 49.4, 47.3, 46.9, 39.5, 36.4, 21.1; ESI-HRMS: calcd. for  $\text{C}_{29}\text{H}_{23}^{79}\text{BrN}_2\text{O}_4 + \text{Na}^+$  565.0733, found 565.0734,  $\text{C}_{29}\text{H}_{23}^{81}\text{BrN}_2\text{O}_4 + \text{Na}^+$  567.0713, found 567.0707.

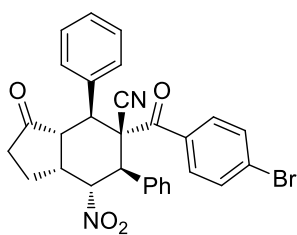

**Synthesis of 12j:** A solution of 2-cyclopentenone **1a** (16.4 mg, 0.2 mmol), (*E*)-2-(4-bromobenzoyl)-3-phenylacrylonitrile (31.0 mg, 0.1 mmol), quinine **C6** (6.4 mg, 0.02 mmol), thiol **T1** (1.5 mg, 0.01 mmol) in *o*-xylene (1.0 mL) was stirred at 30 °C for 48 h. The reaction was monitored by TLC.

After completion, the intermediate was obtained by flash chromatography on silica gel (EtOAc/petroleum ether = 1/12–1/9). After that, the activated alkene **4a** (14.9 mg, 0.1 mmol), DIPEA (12.9 mg, 0.1 mmol) and *o*-xylene (1.0 mL) were added and the reaction was stirred at 50 °C for 48 h. After completion, purification by flash chromatography on silica gel (EtOAc/petroleum ether = 1/9–1/7) gave product **12j**: 43.9 mg, as a white solid, yield 81%;  $[\alpha]_{\text{D}}^{25} = +56.0$  ( $c = 0.2$  in  $\text{CHCl}_3$ ); 91:9 er, determined by HPLC analysis [Daicel chiralcel OD-H, *n*-hexane/*i*-



PrOH = 60/40, 1.0 mL min<sup>-1</sup>,  $\lambda$  = 254 nm]: t (minor) = 15.55 min, t (major) = 37.73 min]; <sup>1</sup>H NMR (400 MHz, CDCl<sub>3</sub>):  $\delta$  (ppm) 7.41–7.30 (m, 10H), 7.10 (d,  $J$  = 8.4 Hz, 2H), 6.16 (d,  $J$  = 8.4 Hz, 2H), 5.91 (dd,  $J$  = 12.8, 5.6 Hz, 1H), 4.20 (d,  $J$  = 12.4 Hz, 1H), 3.72–3.69 (m, 1H), 3.43–3.37 (m, 2H), 2.69–2.49 (m, 2H), 2.41–2.32 (m, 1H), 2.03–1.96 (m, 1H); <sup>13</sup>C NMR (100 MHz, CDCl<sub>3</sub>):  $\delta$  (ppm) 211.4, 195.6, 135.6, 133.0, 132.6, 131.0, 129.4, 129.1, 129.0, 128.1, 127.5, 117.9, 85.3, 62.1, 49.4, 47.3, 46.8, 39.5, 36.4, 21.1; ESI-HRMS: calcd. for C<sub>29</sub>H<sub>23</sub><sup>79</sup>BrN<sub>2</sub>O<sub>4</sub>+Na<sup>+</sup> 565.0733, found 565.0731, C<sub>29</sub>H<sub>23</sub><sup>81</sup>BrN<sub>2</sub>O<sub>4</sub>+Na<sup>+</sup> 567.0713, found 567.0717.

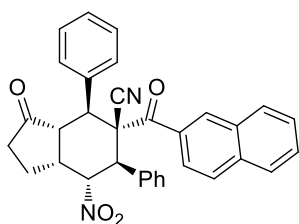

**Synthesis of 12k:** A solution of 2-cyclopentenone **1a** (16.4 mg, 0.2 mmol), (*E*)-2-(2-naphthoyl)-3-phenylacrylonitrile (28.3 mg, 0.1 mmol), quinine **C6** (6.4 mg, 0.02 mmol), thiol **T1** (1.5 mg, 0.01 mmol) in *o*-xylene (1.0 mL) was stirred at 30 °C for 48 h. The reaction was monitored by TLC. After

completion, the intermediate was obtained by flash chromatography on silica gel (EtOAc/petroleum ether = 1/12–1/9). After that, the activated alkene **4a** (14.9 mg, 0.1 mmol), DIPEA (12.9 mg, 0.1 mmol) and *o*-xylene (1.0 mL) were added and the reaction was stirred at 50 °C for 48 h. After completion, purification by flash chromatography on silica gel (EtOAc/petroleum ether = 1/9–1/7) gave product **12k**: 41.6 mg, as a white solid, yield 81%; [ $\alpha$ ]<sub>D</sub><sup>25</sup> = +64.0 ( $c$  = 0.5 in CHCl<sub>3</sub>); 90:10 er, determined by HPLC analysis [Daicel chiralpak AD-H, *n*-hexane/*i*-PrOH = 60/40, 1.0 mL min<sup>-1</sup>,  $\lambda$  = 254 nm]: t (minor) = 12.31 min, t (major) = 21.15 min]; <sup>1</sup>H NMR (400 MHz, CDCl<sub>3</sub>):  $\delta$  (ppm) 7.63–7.61 (m, 2H), 7.47–7.36 (m, 7H), 7.34–7.25 (m, 5H), 6.72 (s, 1H), 6.46 (dd,  $J$  = 8.4, 1.6 Hz, 1H), 5.95 (dd,  $J$  = 12.4, 5.6 Hz, 1H), 4.51 (d,  $J$  = 12.8 Hz, 1H), 3.78 (d,  $J$  = 12.8 Hz, 1H), 3.49–3.39 (m, 2H), 2.72–2.54 (m, 2H), 2.43–2.33 (m, 1H), 2.05–1.98 (m, 1H); <sup>13</sup>C NMR (100 MHz, CDCl<sub>3</sub>):  $\delta$  (ppm) 211.6, 196.2, 134.5, 134.3, 133.3, 132.9, 131.2, 129.4, 129.3, 129.0, 128.5, 128.4, 127.6, 127.4, 126.7, 122.5, 118.1, 85.4, 62.3, 49.5, 47.4, 46.9, 39.6, 36.4, 21.1; ESI-HRMS: calcd. for C<sub>33</sub>H<sub>26</sub>N<sub>2</sub>O<sub>4</sub>+Na<sup>+</sup> 537.1785, found 537.1786.

## 8. Reaction at a 1.0 mmol scale

A solution of 2-cyclopentenone **1a** (164 mg, 2.0 mmol), (*E*)-2-benzoyl-3-(4-bromophenyl) acrylonitrile (310 mg, 1.0 mmol), quinine **C6** (64 mg, 0.2 mmol), thiol **T1** (15 mg, 0.1 mmol) in *o*-xylene (10.0 mL) was stirred at 30 °C for 72 h. The reaction was monitored by TLC. After completion, the intermediate was obtained by flash chromatography on silica gel (EtOAc/petroleum ether = 1/10).

Then the activated alkene **4a** (149 mg, 1.0 mmol), *N,N*-diisopropylethylamine (DIPEA, 129 mg, 1.0 mmol) and *o*-xylene (10.0 mL) were added and the reaction was stirred at 50 °C for 48 h (monitored by TLC). After completion, the product **12f** was obtained by flash chromatography on silica gel (EtOAc/petroleum ether = 1/8): 406 mg, as a white solid, yield 75%, 94.5:5.5 er.

## 9. Procedure for the cross RC reaction-initiated [4 + 2] annulation

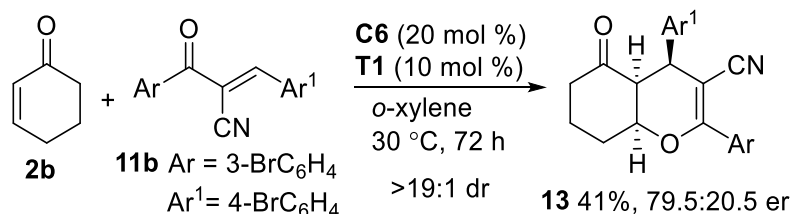

A solution of 2-cyclohexenone **2b** (1.0 mmol, 10.0 equiv),  $\alpha$ -cyano chalcone **11b** (0.1 mmol, 1.0 equiv), quinine **C6** (20 mol %), thiol **T1** (10 mol %) in *o*-xylene (0.4 mL) was stirred at 30 °C for 72 h. The reaction was monitored by TLC. The product **13** was obtained by flash chromatography on silica gel (EtOAc/petroleum ether): 20.8 mg, as a white solid, yield 41%;  $[\alpha]_D^{25} = +84.0$  ( $c = 0.3$  in  $\text{CHCl}_3$ ); 79.5:20.5 er, determined by HPLC analysis [Daicel chiralpak AD-H, *n*-hexane/*i*-PrOH = 60/40, 1.0 mL min<sup>-1</sup>,  $\lambda = 254$  nm]:  $t$  (minor) = 8.85 min,  $t$  (major) = 20.00 min]; <sup>1</sup>H NMR (400 MHz,  $\text{CDCl}_3$ ):  $\delta$  (ppm) 7.84–7.83 (m, 1H), 7.81–7.78 (m, 1H), 7.62–7.59 (m, 1H), 7.53–7.50 (m, 2H), 7.32 (t,  $J = 8.0$  Hz, 1H), 7.15–7.12 (m, 2H), 4.59 (d,  $J = 2.8$  Hz, 1H), 4.48 (s, 1H), 2.73 (d,  $J = 3.2$  Hz, 1H), 2.56–2.52 (m, 1H), 2.44–2.36 (m, 2H), 2.07–2.03 (m, 2H), 1.95–1.86 (m, 1H); <sup>13</sup>C NMR (100 MHz,  $\text{CDCl}_3$ ):  $\delta$  (ppm) 205.2, 164.0, 140.4, 134.3, 134.0, 132.3, 130.9, 129.9, 129.7, 127.0, 122.4, 121.8, 118.9, 85.0, 74.4, 54.3, 40.7, 37.6, 29.2, 21.6; ESI-HRMS: calcd. for  $\text{C}_{22}\text{H}_{17}^{79}\text{BrNO}_2 + \text{Na}^+$  507.9518, found 507.9516.  $\text{C}_{22}\text{H}_{17}^{81}\text{BrNO}_2 + \text{Na}^+$  509.9498, found 509.9503.

## 10. More attempts for the cross RC reaction-initiated [4 + 2] annulations

The [4 + 2] annulation reactions between 2-cyclohexenone **2b** and  $\alpha$ -cyano chalcone derivatives **11** generally proceeded not well, and excess **2b** (10.0 equiv) was required for better conversions. For simple  $\alpha$ -cyano chalcone **11a**, the desired product could not be isolated due to the low yield and some inseparable impurities. Similar phenomena were observed for some other  $\alpha$ -cyano chalcone derivatives **11** with electron-withdrawing groups on the phenyl ring. We have made efforts to optimize the reaction conditions by employing **11a** as the substrate, and a better yield with a low er value was obtained under the catalysis of **C27** and **T18**. In addition, cyclohept-2-enone **1c** and  $\alpha'$ -benzylidene 2-cyclopentenone **6** were also applied to the [4 + 2] annulation, but the reaction were not satisfactory.

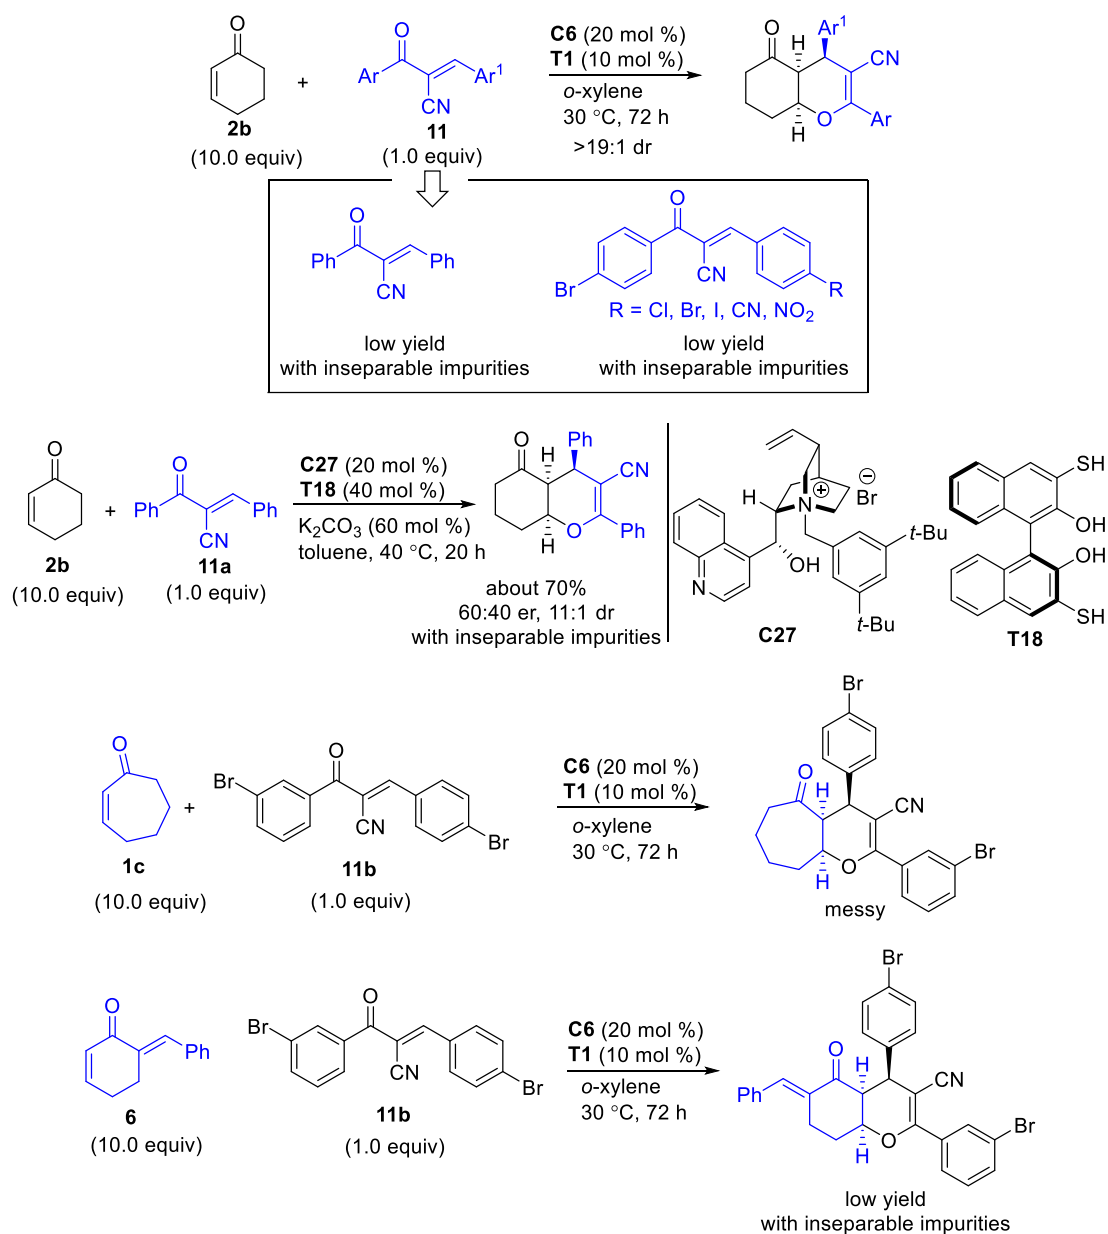

## 11. Synthetic transformations of the annulation products **5a** and **12a**

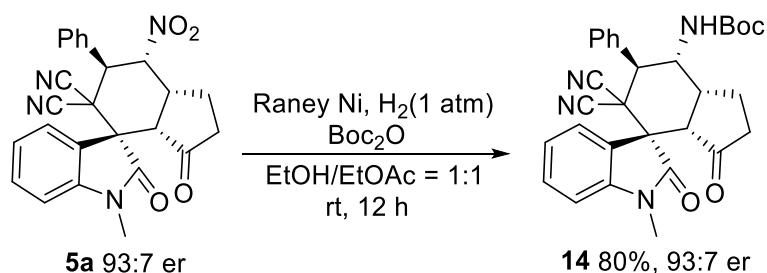

A solution of **5a** (0.1 mmol, 44.0 mg, 93:7 er),  $Boc_2O$  (0.15 mmol, 32.7 mg) in the solvent of EtOH (0.5 mL) and EtOAc (0.5 mL) was combined with Raney Ni (W2; 50.0 mg, wet weight). The mixture was stirred at room temperature under hydrogen (1 atm) for 12 h. The mixture was filtered through a bed of celite and concentrated under reduced pressure. The residue was purified by flash

chromatography (EtOAc/petroleum ether = 1:5) to give compound **14**: 40.8 mg, as a white solid, yield 80%;  $[\alpha]_D^{25} = +66.2$  ( $c = 0.65$  in  $\text{CHCl}_3$ ); 93:7 er, determined by HPLC analysis [Daicel chiralpak OD-H,  $n$ -hexane/ $i$ -PrOH = 60/40,  $1.0 \text{ mL min}^{-1}$ ,  $\lambda = 254 \text{ nm}$ ]:  $t$  (minor) = 8.04 min,  $t$  (major) = 9.17 min];  $^1\text{H NMR}$  (400 MHz,  $\text{CDCl}_3$ ):  $\delta$  (ppm) 7.72 (dd,  $J = 7.8 \text{ Hz}$ , 1.1 Hz, 1H), 7.56–7.50 (m, 2H), 7.49–7.35 (m, 4H), 7.28–7.22 (m, 1H), 6.91 (d,  $J = 7.8 \text{ Hz}$ , 1H), 5.14–5.09 (m, 1H), 4.74 (brs, 1H), 4.66 (d,  $J = 12.2 \text{ Hz}$ , 1H), 3.40–3.26 (m, 1H), 3.22 (d,  $J = 9.3 \text{ Hz}$ , 1H), 3.18 (s, 3H), 2.67–2.56 (m, 1H), 2.45–2.38 (m, 1H), 2.31–2.21 (m, 1H), 2.11–2.04 (m, 1H), 1.31 (s, 9H);  $^{13}\text{C NMR}$  (100 MHz,  $\text{CDCl}_3$ ):  $\delta$  (ppm) 214.8, 173.1, 155.1, 143.3, 133.2, 130.9, 129.7, 129.4, 129.0, 126.2, 124.7, 124.2, 112.1, 111.5, 109.2, 80.1, 53.3, 49.3, 49.1, 48.3, 42.8, 39.4, 38.5, 28.2, 26.9, 22.4; ESI-HRMS: calcd. for  $\text{C}_{30}\text{H}_{30}\text{N}_4\text{O}_4 + \text{Na}^+$  533.2159, found 533.2158.

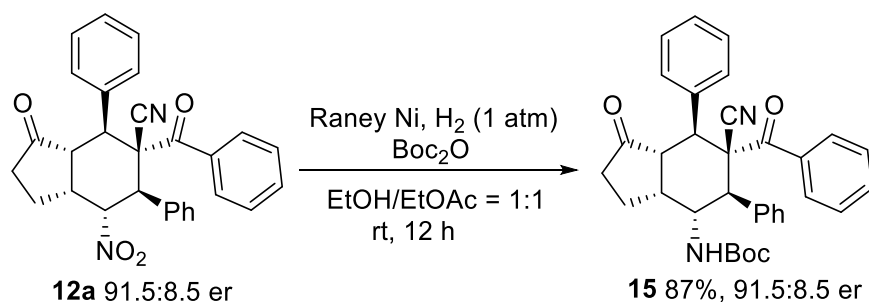

A solution of **12a** (0.1 mmol, 46.4 mg, 91.5:8.5 er),  $\text{Boc}_2\text{O}$  (0.15 mmol, 32.7 mg) in the solvent of EtOH (0.5 mL) and EtOAc (0.5 mL) was combined with Raney Ni (W2; 50.0 mg, wet weight). The mixture was stirred at room temperature under hydrogen (1 atm) for 12 h. The mixture was filtered through a bed of celite and condensed under reduced pressure. The residue was purified by flash chromatography (EtOAc/petroleum ether = 1:5) to give compound **15**: 46.4 mg, as a white solid, yield 87%;  $[\alpha]_D^{25} = +37.1$  ( $c = 0.75$  in  $\text{CHCl}_3$ ); 91.5:8.5 er, determined by HPLC analysis [Daicel chiralpak AD-H,  $n$ -hexane/ $i$ -PrOH = 80/20,  $1.0 \text{ mL min}^{-1}$ ,  $\lambda = 254 \text{ nm}$ ]:  $t$  (minor) = 8.95 min,  $t$  (major) = 10.13 min];  $^1\text{H NMR}$  (400 MHz,  $\text{CDCl}_3$ ):  $\delta$  (ppm) 7.47–7.20 (m, 10H), 7.16 (t,  $J = 7.5 \text{ Hz}$ , 1H), 6.92 (t,  $J = 7.9 \text{ Hz}$ , 2H), 6.31–6.22 (m, 2H), 5.04 (brs, 1H), 4.32 (d,  $J = 8.5 \text{ Hz}$ , 1H), 3.69 (d,  $J = 12.7 \text{ Hz}$ , 1H), 3.62 (d,  $J = 13.3 \text{ Hz}$ , 1H), 3.31 (dd,  $J = 13.3, 6.5 \text{ Hz}$ , 1H), 3.17–3.14 (m, 1H), 2.63–2.51 (m, 1H), 2.41–2.13 (m, 3H), 1.29 (s, 9H);  $^{13}\text{C NMR}$  (100 MHz,  $\text{CDCl}_3$ ):  $\delta$  (ppm) 213.9, 198.0, 155.0, 137.5, 134.4, 134.3, 131.8, 129.9, 128.9, 128.8, 128.6, 127.4, 126.6, 118.3, 80.0, 63.6, 50.5, 49.8, 46.9, 40.3, 36.6, 28.2, 20.3; ESI-HRMS: calcd. for  $\text{C}_{34}\text{H}_{34}\text{N}_2\text{O}_4 + \text{Na}^+$  557.2411, found 557.2409.

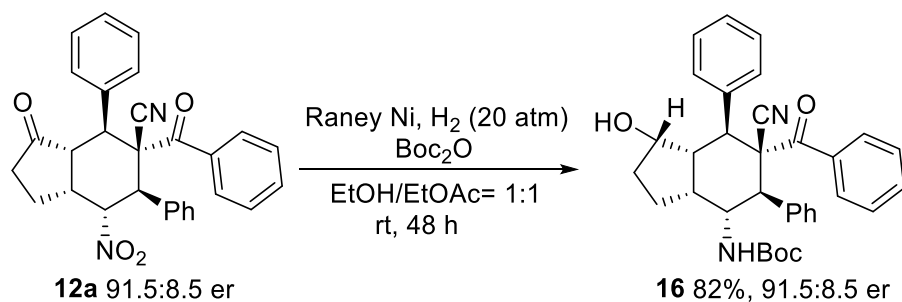

A solution of **12a** (0.1 mmol, 46.4 mg, 91.5:8.5 er), Boc<sub>2</sub>O (0.15 mmol, 32.7 mg) in the solvent of EtOH (0.5 mL) and EtOAc (0.5 mL) was combined with Raney Ni (W2; 50.0 mg, wet weight). The mixture was stirred at room temperature under hydrogen (20 atm) for 48 h. The mixture was filtered through a bed of celite and condensed under reduced pressure. The residue was purified by flash chromatography (EtOAc/petroleum ether = 1:4) to give compound **16**: 44.0 mg, as a white solid, yield 82%;  $[\alpha]_{\text{D}}^{25} = -12.6$  ( $c = 0.35$  in CHCl<sub>3</sub>); 91.5:8.5 er, >19:1 dr, determined by HPLC analysis [Daicel chiralpak AD-H, *n*-hexane/*i*-PrOH = 80/20, 1.0 mL min<sup>-1</sup>,  $\lambda = 254$  nm]:  $t$  (major) = 8.67 min,  $t$  (minor) = 12.18 min]; <sup>1</sup>H NMR (400 MHz, CDCl<sub>3</sub>):  $\delta$  (ppm) 7.51–7.00 (m, 11H), 6.85 (t,  $J = 7.7$  Hz, 2H), 6.18 (d,  $J = 7.8$  Hz, 2H), 4.81 (brs, 1H), 4.37–4.33 (m, 2H), 3.69–3.60 (m, 2H), 3.17–3.02 (m, 1H), 2.96–2.82 (m, 1H), 2.10–2.07 (m, 1H), 2.00–1.85 (m, 1H), 1.81–1.72 (m, 2H), 1.22 (s, 9H), 0.67 (brs, 1H); <sup>13</sup>C NMR (100 MHz, CDCl<sub>3</sub>):  $\delta$  (ppm) 198.9, 155.1, 138.2, 137.9, 135.1, 130.0, 129.1, 128.8, 128.3, 128.1, 127.3, 126.6, 119.0, 79.5, 76.0, 64.4, 50.9, 49.7, 47.1, 44.5, 40.0, 28.2, 20.9; ESI-HRMS: calcd. for C<sub>34</sub>H<sub>37</sub>N<sub>2</sub>O<sub>4</sub>+H<sup>+</sup> 537.2748, found 537.2750.

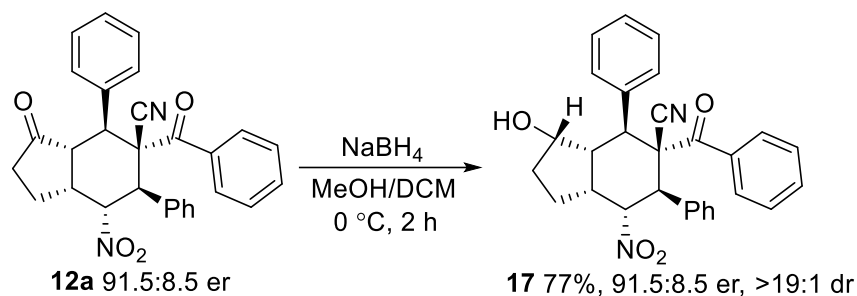

To a solution of **12a** (0.1 mmol, 46.4 mg, 91.5:8.5 er) in the solvent of MeOH (0.5 mL) and DCM (0.5 mL) was added NaBH<sub>4</sub> (0.15 mmol, 5.7 mg) at 0 °C. After 2 h, the mixture was quenched with saturated NH<sub>4</sub>Cl solution. The phases were separated and the aqueous phase was extracted with DCM (2 × 5 mL). The combined organic phases were washed with brine (10 mL) before being dried (Na<sub>2</sub>SO<sub>4</sub>) and concentrated in vacuum. The residue was purified by flash chromatography (EtOAc/petroleum ether = 1:6) to give compound **17**: 35.9 mg, as a white solid, yield 77%;  $[\alpha]_{\text{D}}^{25} = -26.7$  ( $c = 0.15$  in CHCl<sub>3</sub>); 91.5:8.5 er, >19:1 dr, determined by HPLC analysis [Daicel chiralpak AD-

H, *n*-hexane/*i*-PrOH = 80/20, 1.0 mL min<sup>-1</sup>, λ = 254 nm]: t (major) = 6.88 min, t (minor) = 10.74 min]; <sup>1</sup>H NMR (400 MHz, CDCl<sub>3</sub>): δ (ppm) 7.38–7.14 (m, 10H), 7.13–7.08 (m, 1H), 6.86 (t, *J* = 7.9 Hz, 2H), 6.19 (dd, *J* = 8.2, 1.4 Hz, 2H), 5.72 (dd, *J* = 12.6, 5.8 Hz, 1H), 4.48–4.42 (m, 1H), 4.31 (d, *J* = 12.6 Hz, 1H), 3.79 (d, *J* = 12.6 Hz, 1H), 3.30–3.23 (m, 1H), 3.10–3.02 (m, 1H), 2.33–2.22 (m, 1H), 2.19–2.10 (m, 1H), 1.88–1.79 (m, 1H), 1.60–1.51 (m, 1H), 0.64 (brs, 1H); <sup>13</sup>C NMR (100 MHz, CDCl<sub>3</sub>): δ (ppm) 197.6, 137.5, 137.6, 133.5, 132.3, 129.7, 128.8, 127.8, 127.0, 119.0, 86.4, 76.1, 63.4, 47.4, 47.4, 44.8, 40.8, 30.6, 21.6; ESI-HRMS: calcd. for C<sub>29</sub>H<sub>26</sub>N<sub>2</sub>O<sub>4</sub>+Na<sup>+</sup> 489.1785, found 489.1786.

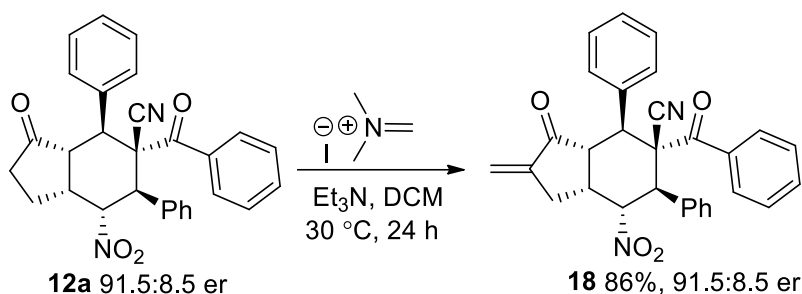

To a solution of **12a** (0.1 mmol, 46.4 mg, 91.5:8.5 er) in dry DCM (1.0 mL) was added Et<sub>3</sub>N (0.2 mmol, 20.2 mg) at room temperature. The mixture was stirred for 15 min and Eschensomer's salt (0.2 mmol, 37 mg) was added, and then continuously stirred for 24 h at 30 °C. The mixture was quenched with saturated NH<sub>4</sub>Cl solution. The phases were separated and the aqueous phase was extracted with DCM (2 × 5 mL). The combined organic phases were washed with brine (10 mL) before being dried (Na<sub>2</sub>SO<sub>4</sub>) and concentrated in vacuum. The residue was purified by flash chromatography (EtOAc/petroleum ether = 1:12) to give compound **18**: 41.1 mg, as a white solid, yield 86%; [ $\alpha$ ]<sub>D</sub><sup>25</sup> = +46.8 (*c* = 0.8 in MeOH); 91.5:8.5 er, determined by HPLC analysis [Daicel chiralpak IE, *n*-hexane/*i*-PrOH = 80/20, 1.0 mL min<sup>-1</sup>, λ = 254 nm]: t (minor) = 12.32 min, t (major) = 14.68 min]; <sup>1</sup>H NMR (400 MHz, CD<sub>3</sub>OD): δ (ppm) 7.47–7.46 (m, 3H), 7.35–7.20 (m, 8H), 6.94 (t, *J* = 8.0 Hz, 2H), 6.30 (d, *J* = 7.6 Hz, 2H), 6.09–6.04 (m, 2H), 5.61 (s, 1H), 3.80 (d, *J* = 13.2 Hz, 1H), 3.61 (dd, *J* = 13.2, 6.4 Hz, 1H), 3.49–3.45 (m, 1H), 3.40–3.32 (m, 1H), 2.62 (dd, *J* = 16.4, 6.8 Hz, 1H); <sup>13</sup>C NMR (100 MHz, CD<sub>3</sub>OD): δ (ppm) 200.8, 196.2, 142.0, 137.3, 134.0, 133.4, 131.7, 128.8, 128.7, 128.4, 128.3, 127.1, 126.5, 120.3, 117.8, 85.2, 62.1, 53.4, 49.7, 36.8, 27.5; ESI-HRMS: calcd. for C<sub>30</sub>H<sub>24</sub>N<sub>2</sub>O<sub>4</sub>+Na<sup>+</sup> 499.1628, found 499.1624.

## 12. Crystal data and structure refinement for enantiopure 5g and 12f

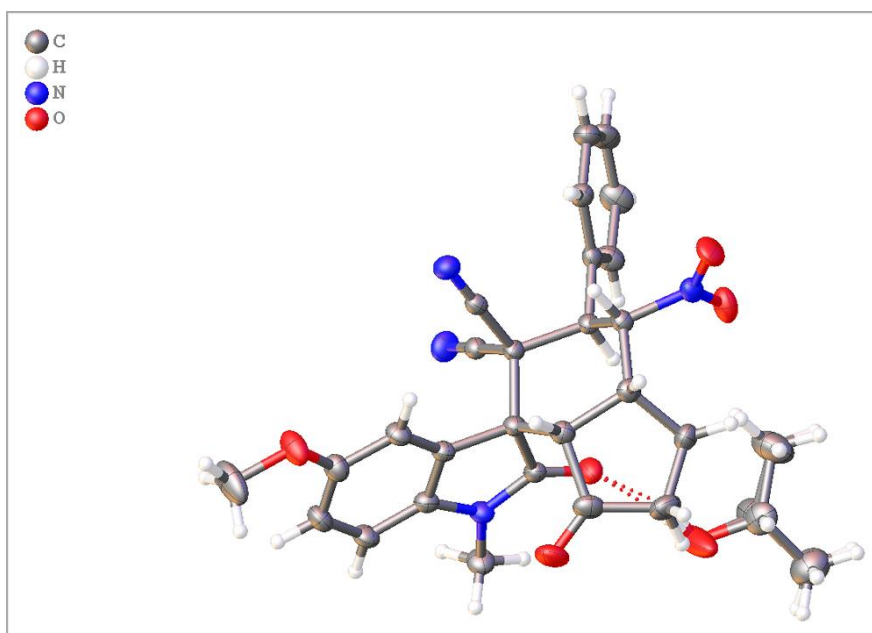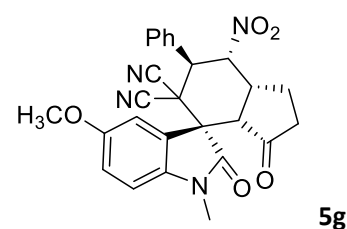

|                                      |                                                               |
|--------------------------------------|---------------------------------------------------------------|
| Identification code                  | <b>5g</b> (CCDC 1877057)                                      |
| Empirical formula                    | C <sub>29</sub> H <sub>30</sub> N <sub>4</sub> O <sub>6</sub> |
| Formula weight                       | 530.57                                                        |
| Temperature/K                        | 136                                                           |
| Crystal system                       | orthorhombic                                                  |
| Space group                          | P2 <sub>1</sub> 2 <sub>1</sub> 2 <sub>1</sub>                 |
| a/Å                                  | 9.25485(18)                                                   |
| b/Å                                  | 9.9771(2)                                                     |
| c/Å                                  | 29.5378(5)                                                    |
| α/°                                  | 90                                                            |
| β/°                                  | 90                                                            |
| γ/°                                  | 90                                                            |
| Volume/Å <sup>3</sup>                | 2727.40(9)                                                    |
| Z                                    | 4                                                             |
| ρ <sub>calc</sub> /g/cm <sup>3</sup> | 1.292                                                         |
| μ/mm <sup>-1</sup>                   | 0.754                                                         |
| F(000)                               | 1120.0                                                        |
| Crystal size/mm <sup>3</sup>         | 0.5 × 0.4 × 0.1                                               |
| Radiation                            | CuKα (λ = 1.54184)                                            |
| 2θ range for data collection/°       | 9.356 to 134.152                                              |
| Index ranges                         | -10 ≤ h ≤ 11, -11 ≤ k ≤ 11, -25 ≤ l ≤ 35                      |
| Reflections collected                | 14563                                                         |
| Independent reflections              | 4852 [R <sub>int</sub> = 0.0372, R <sub>sigma</sub> = 0.0337] |
| Data/restraints/parameters           | 4852/0/364                                                    |

|                                                |                                  |
|------------------------------------------------|----------------------------------|
| Goodness-of-fit on $F^2$                       | 1.034                            |
| Final R indexes [ $I \geq 2\sigma(I)$ ]        | $R_1 = 0.0444$ , $wR_2 = 0.1159$ |
| Final R indexes [all data]                     | $R_1 = 0.0471$ , $wR_2 = 0.1190$ |
| Largest diff. peak/hole / $e \text{ \AA}^{-3}$ | 0.22/-0.25                       |
| Flack parameter                                | 0.09(10)                         |

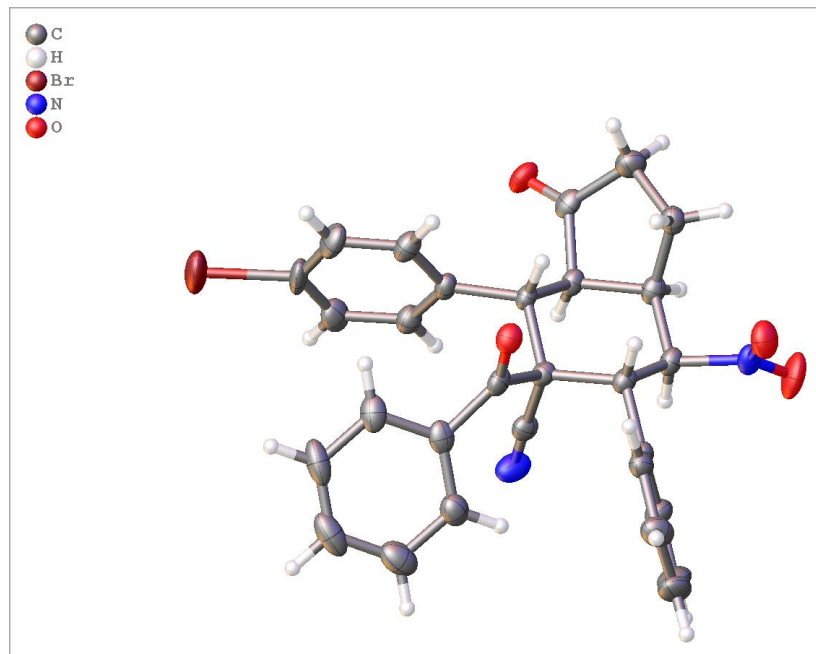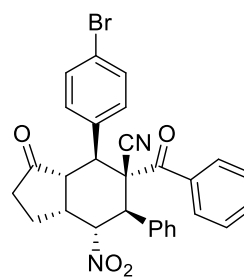

**12f**

|                                               |                                                                  |
|-----------------------------------------------|------------------------------------------------------------------|
| Identification code                           | <b>12f</b> (CCDC 1877058)                                        |
| Empirical formula                             | $C_{29}H_{23}BrN_2O_4$                                           |
| Formula weight                                | 543.40                                                           |
| Temperature/K                                 | 142                                                              |
| Crystal system                                | orthorhombic                                                     |
| Space group                                   | P212121                                                          |
| $a/\text{\AA}$                                | 7.6578(2)                                                        |
| $b/\text{\AA}$                                | 11.9171(4)                                                       |
| $c/\text{\AA}$                                | 27.6310(7)                                                       |
| $\alpha/^\circ$                               | 90                                                               |
| $\beta/^\circ$                                | 90                                                               |
| $\gamma/^\circ$                               | 90                                                               |
| Volume/ $\text{\AA}^3$                        | 2521.56(13)                                                      |
| $Z$                                           | 4                                                                |
| $\rho_{\text{calc}}/\text{cm}^3$              | 1.431                                                            |
| $\mu/\text{mm}^{-1}$                          | 2.536                                                            |
| $F(000)$                                      | 1112.0                                                           |
| Crystal size/ $\text{mm}^3$                   | $0.65 \times 0.4 \times 0.3$                                     |
| Radiation                                     | $\text{CuK}\alpha$ ( $\lambda = 1.54184$ )                       |
| $2\theta$ range for data collection/ $^\circ$ | 9.802 to 145.462                                                 |
| Index ranges                                  | $-5 \leq h \leq 9$ , $-13 \leq k \leq 14$ , $-34 \leq l \leq 22$ |
| Reflections collected                         | 11266                                                            |
| Independent reflections                       | 4854 [ $R_{\text{int}} = 0.0326$ , $R_{\text{sigma}} = 0.0371$ ] |



|                                                |                                  |
|------------------------------------------------|----------------------------------|
| Data/restraints/parameters                     | 4854/0/325                       |
| Goodness-of-fit on $F^2$                       | 1.026                            |
| Final R indexes [ $I \geq 2\sigma(I)$ ]        | $R_1 = 0.0550$ , $wR_2 = 0.1472$ |
| Final R indexes [all data]                     | $R_1 = 0.0569$ , $wR_2 = 0.1501$ |
| Largest diff. peak/hole / $e \text{ \AA}^{-3}$ | 1.23/-0.96                       |
| Flack parameter                                | -0.005(12)                       |

### 13. DFT calculations of the key intermediates for the asymmetric cross Rauhut–Currier reaction and proposed catalytic mechanism

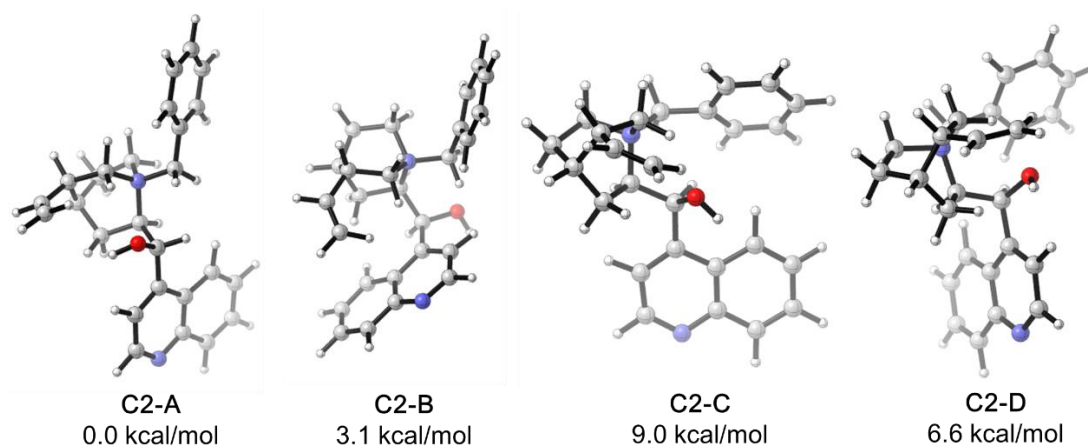

**Figure S1. The conformations and energies of PTC C2.**

The conformations and energies of chiral PTC **C2** were calculated as outlined Figure S1. The structure as **C2-A** with the lowest energy was selected as the most favorable conformation for the following calculations.

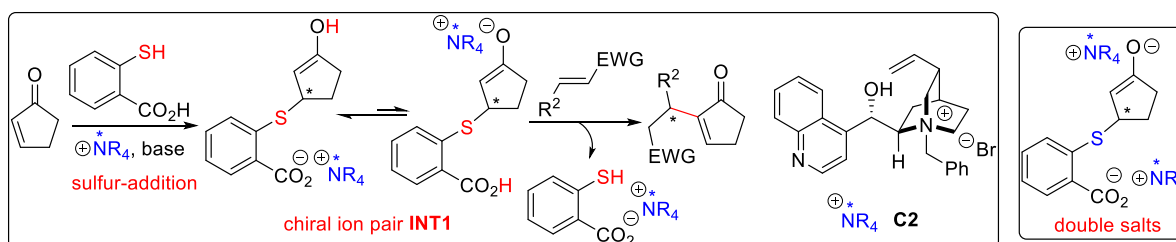

We have investigated the possible double salts after the early sulfur addition to enone **1a**. However, we could not identify any stable intermediate assembled from enone **1a**, thiol **T1** and two equivalent of ammonium cation of **C2**. Therefore, it suggests that the double salt might be unstable and not be generated in the catalytic process. In contrast, we could successfully identify the complexes assembled from one equivalent of enone **1a**, thiol **T1** and PTC **C2**. As shown in the following Figure S2, the carboxylic anion might be better to combine with cation center of **C2**, because the energy of **INT1-R-A** is 8.9 kcal/mol higher than that of **INT1-R-B**. We also tried different complex conformations, while their energies are higher than that of **INT1-R-B**. To explain the stereoselectivity, the pose employing the lowest energy of *S*-configuration (sulfide moiety) was calculated as **INT1-S-B**, whose energy was 2.0 kcal/mol lower than **INT1-R-B**, suggesting that the **C2**-catalyzed sulfur addition of **T1** to enone **1a** prefers to produce *S*-intermediate, which might be the key species for the subsequent stereoselective RC reaction. In addition, the enolate anion-complexed one **INT1-S-A** also has a higher

energy than that of the carboxylic anion-related **INT1-S-B**. Nevertheless, **INT1-S-A** might be the more reliable active intermediate involved in the key RC reaction.

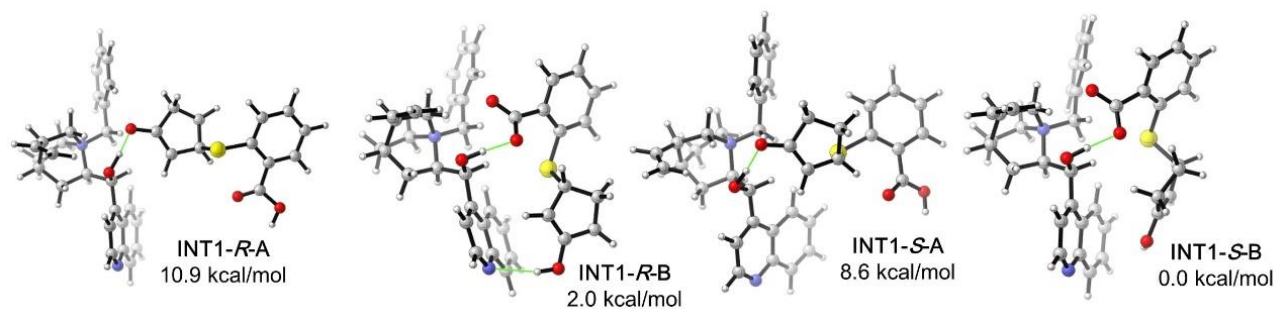

**Figure S2. The structures and energies of the key ion pair INT1.**

Since the subsequent addition of the chiral intermediate **INT1-S-A** to activated alkene **2** would generate the complicated intermediate with three stereogenic centers, and there are a lot of conformation possibilities for the ion pairs in the PTC-based reaction, we were unable to successfully conduct the DFT calculation studies on the following catalytic process [in fact, in comparison with well-established Lewis base catalysis (covalent bonding catalysis), there are very few examples involving DFT calculations of PTC catalysis; for a relatively simple asymmetric alkylation reaction, see: Petrova, G. P.; Li, H.-B.; Maruoka, K.; Morokuma, K. *J. Phys. Chem. B* **2014**, *118*, 5154]. As a result, based on the preliminary DFT calculations, a possible catalytic mechanism was proposed. As outlined in the following scheme, in the presence of PTC **C2** and  $K_2CO_3$ , **T1** attacks enone **1a** from *Si*-face, generating carboxylate ion pair intermediate **I**. After proton transfer, the more reactive enolate ion pair intermediated **II** is formed, followed by another *Si*-face attack to acceptor **2g**. Then **3g** is afforded after elimination of thiol **T1**, and then undergoes diastereoselective Michael addition and annulation with nitroolefin **4a** to give final product **5g**, with the assistance of bases.

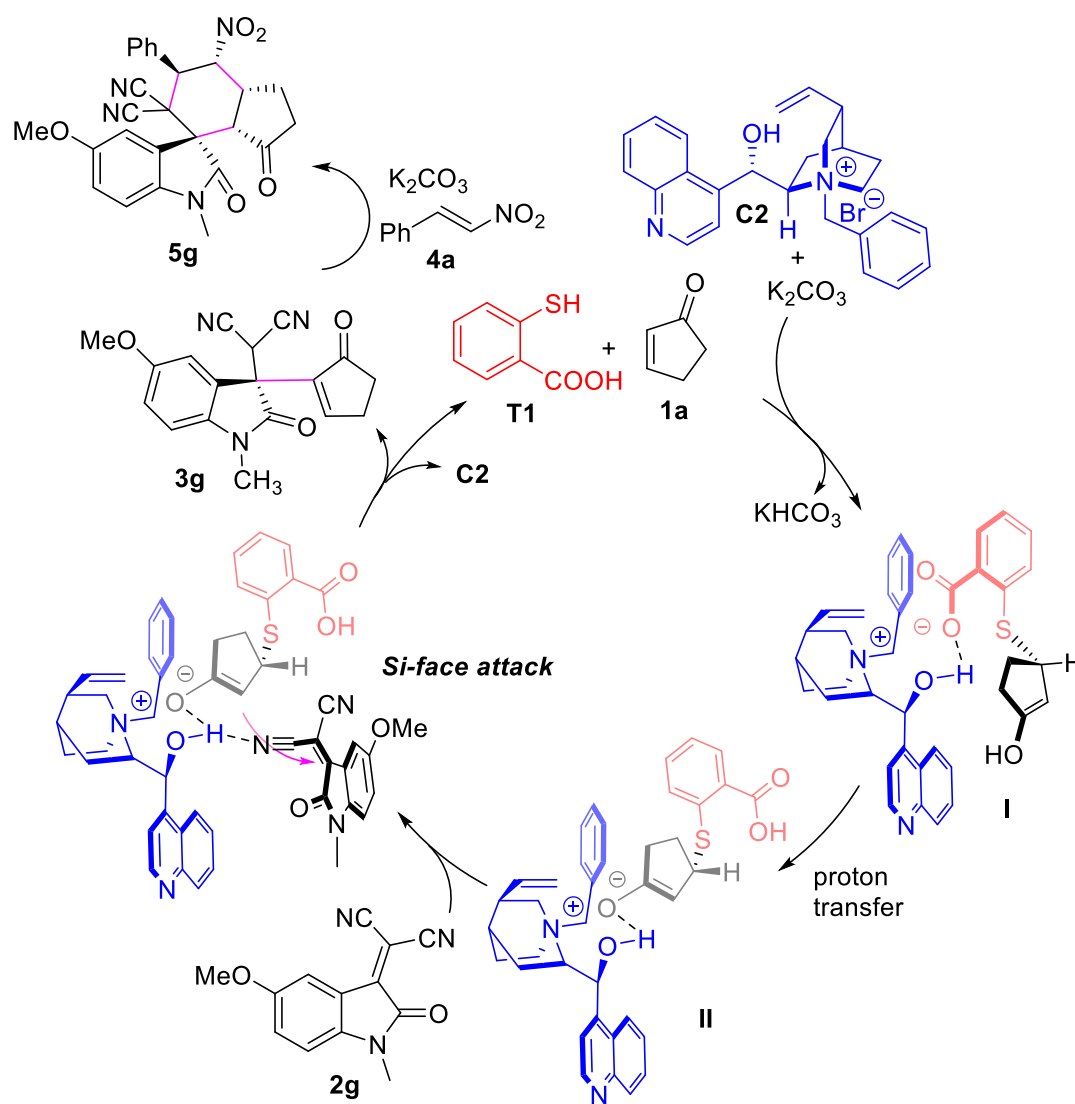

**Proposed mechanism for the double activation catalysis**

### Computational method:

All calculations were carried out with the GAUSSIAN 09 packages.<sup>2</sup> The M06-2X functional, together with a basis set 6-31G(d), were used for optimizing the geometry of all the minima and transition states. All the optimized structures were confirmed by frequency calculations to minima states using the same level of theory. To take solvent effects into account, solution-phase single-point calculations were performed on the gas-phase geometries.<sup>3</sup> The solution-phase single point energy were done using M06-2X method with a basis set 6-311++G(2d,p). Solvent effect was accounted for using self-consistent reaction field (SCRF) method, using SMD model and UAKS radii.<sup>4</sup> Toluene was used as the solvent. Solution-phase single-point energies corrected by the gas-phase Gibbs free energy corrections were used to describe all the reaction energetics. All of these energies correspond

to the reference state of 1 mol/L, 298 K. All energetics reported throughout the text are in kcal/mol. Structures were generated using GaussView5.0.8 and CYLview.

- (2) Frisch, M. J.; Trucks, G. W.; Schlegel, H. B.; Scuseria, G. E.; Robb, M. A.; Cheeseman, J. R.; Scalmani, G.; Barone, V.; Mennucci, B.; Petersson, G. A.; Nakatsuji, H.; Caricato, M.; Li, X.; Hratchian, H. P.; Izmaylov, A. F.; Bloino, J.; Zheng, G.; Sonnenberg, J. L.; Hada, M.; Ehara, M.; Toyota, K.; Fukuda, R.; Hasegawa, J.; Ishida, M.; Nakajima, T.; Honda, Y.; Kitao, O.; Nakai, H.; Vreven, T.; Montgomery Jr., J. A.; Peralta, J. E.; Ogliaro, F.; Bearpark, M. J.; Heyd, J.; Brothers, E. N.; Kudin, K. N.; Staroverov, V. N.; Kobayashi, R.; Normand, J.; Raghavachari, K.; Rendell, A. P.; Burant, J. C.; Iyengar, S. S.; Tomasi, J.; Cossi, M.; Rega, N.; Millam, N. J.; Klene, M.; Knox, J. E.; Cross, J. B.; Bakken, V.; Adamo, C.; Jaramillo, J.; Gomperts, R.; Stratmann, R. E.; Yazyev, O.; Austin, A. J.; Cammi, R.; Pomelli, C.; Ochterski, J. W.; Martin, R. L.; Morokuma, K.; Zakrzewski, V. G.; Voth, G. A.; Salvador, P.; Dannenberg, J. J.; Dapprich, S.; Daniels, A. D.; Farkas, Ö.; Foresman, J. B.; Ortiz, J. V.; Cioslowski, J.; Fox, D. J. Gaussian 09, Gaussian, Inc.: Wallingford, CT, USA, 2009.
- (3) Um, J. M.; DiRocco, D. A.; Noey, E. L.; Rovis, T.; Houk, K. N. *J. Am. Chem. Soc.* **2011**, *133*, 11249–11254.
- (4) (a) Marenich, A. V.; Cramer, C. J.; Truhlar, D. G. *J. Phys. Chem. B* **2009**, *113*, 6378–6396. (b) Ribeiro, R. F.; Marenich, A. V.; Cramer, C. J.; Truhlar, D. G. *J. Phys. Chem. B* **2011**, *115*, 14556–14562.

Computational data:

## C2-A

Zero-point correction= 0.507703 (Hartree/Particle)  
 Thermal correction to Energy= 0.531230  
 Thermal correction to Enthalpy= 0.532174  
 Thermal correction to Gibbs Free Energy= 0.454412  
 E(sof) = -1192.63956251 A.U.

| Center<br>Number | Atomic<br>Number | Atomic<br>Type | Coordinates (Angstroms) |          |           |
|------------------|------------------|----------------|-------------------------|----------|-----------|
|                  |                  |                | X                       | Y        | Z         |
| 1                | 8                | 0              | 0.402282                | 1.218742 | -1.885185 |
| 2                | 6                | 0              | 0.918140                | 0.210332 | -1.047973 |
| 3                | 6                | 0              | 0.269875                | 0.254091 | 0.356339  |

|    |   |   |           |           |           |
|----|---|---|-----------|-----------|-----------|
| 4  | 7 | 0 | -1.266854 | 0.152375  | 0.346896  |
| 5  | 6 | 0 | -1.690912 | -0.199375 | 1.756048  |
| 6  | 6 | 0 | -1.094652 | 0.809697  | 2.755348  |
| 7  | 6 | 0 | -1.927513 | 1.468122  | -0.008969 |
| 8  | 6 | 0 | -1.566714 | 2.560010  | 1.018434  |
| 9  | 6 | 0 | -1.105292 | 3.858716  | 0.399399  |
| 10 | 6 | 0 | -1.077396 | 4.199654  | -0.889478 |
| 11 | 6 | 0 | -0.505484 | 1.994415  | 1.984307  |
| 12 | 6 | 0 | 0.681217  | 1.499931  | 1.162062  |
| 13 | 6 | 0 | 2.427916  | 0.242901  | -0.875919 |
| 14 | 6 | 0 | 3.116462  | -0.899646 | -0.360822 |
| 15 | 6 | 0 | 2.504211  | -2.156562 | -0.096952 |
| 16 | 6 | 0 | 3.237168  | -3.206617 | 0.401069  |
| 17 | 6 | 0 | 4.619743  | -3.057821 | 0.665649  |
| 18 | 6 | 0 | 5.245113  | -1.865654 | 0.402371  |
| 19 | 6 | 0 | 4.515513  | -0.767882 | -0.124491 |
| 20 | 7 | 0 | 5.210331  | 0.374380  | -0.393398 |
| 21 | 6 | 0 | 4.555030  | 1.380219  | -0.911008 |
| 22 | 6 | 0 | 3.158668  | 1.365007  | -1.169574 |
| 23 | 6 | 0 | -3.161275 | -1.309987 | -0.567901 |
| 24 | 6 | 0 | -3.584748 | -2.360123 | 0.253764  |
| 25 | 6 | 0 | -4.925222 | -2.734643 | 0.286333  |
| 26 | 6 | 0 | -5.853715 | -2.068042 | -0.512410 |
| 27 | 6 | 0 | -5.437362 | -1.037105 | -1.353053 |
| 28 | 6 | 0 | -4.095579 | -0.664537 | -1.384511 |
| 29 | 6 | 0 | -1.705964 | -0.929084 | -0.633516 |
| 30 | 1 | 0 | 0.695737  | 2.095846  | -1.588588 |
| 31 | 1 | 0 | 0.660441  | -0.724224 | -1.553164 |
| 32 | 1 | 0 | 0.577552  | -0.648822 | 0.894430  |
| 33 | 1 | 0 | -2.782427 | -0.191226 | 1.754554  |
| 34 | 1 | 0 | -1.356737 | -1.223339 | 1.943568  |
| 35 | 1 | 0 | -0.313029 | 0.333780  | 3.355736  |
| 36 | 1 | 0 | -1.875840 | 1.142949  | 3.444235  |
| 37 | 1 | 0 | -3.000273 | 1.268867  | -0.021785 |
| 38 | 1 | 0 | -1.598324 | 1.699976  | -1.019623 |
| 39 | 1 | 0 | -2.460824 | 2.789964  | 1.614776  |
| 40 | 1 | 0 | -0.780420 | 4.597645  | 1.133355  |
| 41 | 1 | 0 | -0.738934 | 5.187243  | -1.186635 |
| 42 | 1 | 0 | -1.412581 | 3.550702  | -1.695321 |
| 43 | 1 | 0 | -0.186358 | 2.776490  | 2.679518  |
| 44 | 1 | 0 | 1.529971  | 1.237906  | 1.800439  |
| 45 | 1 | 0 | 1.026531  | 2.301669  | 0.499133  |
| 46 | 1 | 0 | 1.452788  | -2.315617 | -0.324194 |
| 47 | 1 | 0 | 2.757241  | -4.164219 | 0.579174  |
| 48 | 1 | 0 | 5.183975  | -3.896693 | 1.060912  |

|    |   |   |           |           |           |
|----|---|---|-----------|-----------|-----------|
| 49 | 1 | 0 | 6.307420  | -1.721938 | 0.572910  |
| 50 | 1 | 0 | 5.131844  | 2.273461  | -1.141156 |
| 51 | 1 | 0 | 2.710081  | 2.250517  | -1.610831 |
| 52 | 1 | 0 | -2.861715 | -2.902897 | 0.859823  |
| 53 | 1 | 0 | -5.241807 | -3.555082 | 0.922603  |
| 54 | 1 | 0 | -6.897811 | -2.364611 | -0.493553 |
| 55 | 1 | 0 | -6.153032 | -0.533695 | -1.995449 |
| 56 | 1 | 0 | -3.770209 | 0.119254  | -2.066085 |
| 57 | 1 | 0 | -1.072176 | -1.795126 | -0.414794 |
| 58 | 1 | 0 | -1.457043 | -0.542099 | -1.624287 |

## C2-B

Zero-point correction= 0.507985 (Hartree/Particle)  
 Thermal correction to Energy= 0.531384  
 Thermal correction to Enthalpy= 0.532328  
 Thermal correction to Gibbs Free Energy= 0.455409  
 E(soy) = -1192.63566738 A.U.

| Center<br>Number | Atomic<br>Number | Atomic<br>Type | Coordinates (Angstroms) |           |           |
|------------------|------------------|----------------|-------------------------|-----------|-----------|
|                  |                  |                | X                       | Y         | Z         |
| 1                | 8                | 0              | -0.029794               | 0.550276  | -2.968068 |
| 2                | 6                | 0              | 0.792373                | -0.108816 | -2.024001 |
| 3                | 6                | 0              | -0.065588               | -1.219149 | -1.357275 |
| 4                | 7                | 0              | -1.253686               | -0.827260 | -0.460577 |
| 5                | 6                | 0              | -2.164799               | -2.037618 | -0.381114 |
| 6                | 6                | 0              | -1.362808               | -3.298567 | -0.030008 |
| 7                | 6                | 0              | -0.763456               | -0.513105 | 0.936453  |
| 8                | 6                | 0              | -0.263828               | -1.789544 | 1.635965  |
| 9                | 6                | 0              | 0.962421                | -1.571516 | 2.488960  |
| 10               | 6                | 0              | 1.656485                | -0.447420 | 2.664639  |
| 11               | 6                | 0              | -0.018666               | -2.859687 | 0.549398  |
| 12               | 6                | 0              | 0.805915                | -2.209102 | -0.559345 |
| 13               | 6                | 0              | 1.538352                | 0.874732  | -1.123836 |
| 14               | 6                | 0              | 2.831139                | 0.586194  | -0.577518 |
| 15               | 6                | 0              | 3.619643                | -0.554584 | -0.903184 |
| 16               | 6                | 0              | 4.843294                | -0.759651 | -0.316344 |
| 17               | 6                | 0              | 5.352285                | 0.158145  | 0.635374  |
| 18               | 6                | 0              | 4.638787                | 1.285942  | 0.946944  |
| 19               | 6                | 0              | 3.381821                | 1.538025  | 0.334982  |
| 20               | 7                | 0              | 2.764652                | 2.709907  | 0.654429  |
| 21               | 6                | 0              | 1.639921                | 2.990626  | 0.046069  |

|    |   |   |           |           |           |
|----|---|---|-----------|-----------|-----------|
| 22 | 6 | 0 | 0.993275  | 2.110613  | -0.855998 |
| 23 | 6 | 0 | -3.293327 | 0.714035  | -0.293329 |
| 24 | 6 | 0 | -4.530322 | 0.157511  | -0.634590 |
| 25 | 6 | 0 | -5.687988 | 0.541589  | 0.037670  |
| 26 | 6 | 0 | -5.621320 | 1.496799  | 1.051326  |
| 27 | 6 | 0 | -4.398116 | 2.078023  | 1.381009  |
| 28 | 6 | 0 | -3.242449 | 1.691943  | 0.706631  |
| 29 | 6 | 0 | -2.041380 | 0.342881  | -1.044452 |
| 30 | 1 | 0 | 0.525498  | 1.062376  | -3.576018 |
| 31 | 1 | 0 | 1.539405  | -0.711029 | -2.560990 |
| 32 | 1 | 0 | -0.549402 | -1.724335 | -2.201151 |
| 33 | 1 | 0 | -2.910707 | -1.795971 | 0.378790  |
| 34 | 1 | 0 | -2.671418 | -2.115609 | -1.346415 |
| 35 | 1 | 0 | -1.206151 | -3.919413 | -0.918304 |
| 36 | 1 | 0 | -1.929285 | -3.896364 | 0.689669  |
| 37 | 1 | 0 | -1.597877 | -0.061744 | 1.473669  |
| 38 | 1 | 0 | 0.020595  | 0.234031  | 0.813508  |
| 39 | 1 | 0 | -1.058791 | -2.163989 | 2.296773  |
| 40 | 1 | 0 | 1.291028  | -2.470141 | 3.011711  |
| 41 | 1 | 0 | 2.531257  | -0.437379 | 3.307349  |
| 42 | 1 | 0 | 1.399797  | 0.505737  | 2.207754  |
| 43 | 1 | 0 | 0.519291  | -3.711637 | 0.974677  |
| 44 | 1 | 0 | 1.208221  | -2.954998 | -1.252937 |
| 45 | 1 | 0 | 1.651158  | -1.692394 | -0.098709 |
| 46 | 1 | 0 | 3.269901  | -1.273335 | -1.637675 |
| 47 | 1 | 0 | 5.432087  | -1.629151 | -0.591941 |
| 48 | 1 | 0 | 6.318263  | -0.024177 | 1.095735  |
| 49 | 1 | 0 | 5.010169  | 2.028825  | 1.645785  |
| 50 | 1 | 0 | 1.188245  | 3.954558  | 0.272965  |
| 51 | 1 | 0 | 0.075104  | 2.434941  | -1.334391 |
| 52 | 1 | 0 | -4.596089 | -0.567266 | -1.443579 |
| 53 | 1 | 0 | -6.642992 | 0.105716  | -0.238837 |
| 54 | 1 | 0 | -6.524345 | 1.800164  | 1.571946  |
| 55 | 1 | 0 | -4.344380 | 2.839567  | 2.152819  |
| 56 | 1 | 0 | -2.293321 | 2.168438  | 0.948552  |
| 57 | 1 | 0 | -2.254188 | 0.064975  | -2.079113 |
| 58 | 1 | 0 | -1.349488 | 1.179072  | -1.060614 |

## C2-C

|                                          |                             |
|------------------------------------------|-----------------------------|
| Zero-point correction=                   | 0.508352 (Hartree/Particle) |
| Thermal correction to Energy=            | 0.531877                    |
| Thermal correction to Enthalpy=          | 0.532821                    |
| Thermal correction to Gibbs Free Energy= | 0.455801                    |



E(sof) = -1192.62657014 A.U.

| Center<br>Number | Atomic<br>Number | Atomic<br>Type | Coordinates (Angstroms) |           |           |
|------------------|------------------|----------------|-------------------------|-----------|-----------|
|                  |                  |                | X                       | Y         | Z         |
| 1                | 8                | 0              | 0.033908                | 0.071354  | 1.097454  |
| 2                | 6                | 0              | 0.302095                | -0.362925 | -0.227589 |
| 3                | 6                | 0              | -0.954469               | -1.078632 | -0.728614 |
| 4                | 7                | 0              | -2.157021               | -0.129099 | -0.928651 |
| 5                | 6                | 0              | -3.136495               | -0.871164 | -1.827401 |
| 6                | 6                | 0              | -3.392892               | -2.290580 | -1.299946 |
| 7                | 6                | 0              | -2.866946               | 0.137097  | 0.385045  |
| 8                | 6                | 0              | -3.548243               | -1.139758 | 0.910179  |
| 9                | 6                | 0              | -3.461227               | -1.307280 | 2.408191  |
| 10               | 6                | 0              | -2.566708               | -0.769161 | 3.236180  |
| 11               | 6                | 0              | -2.940075               | -2.343962 | 0.161540  |
| 12               | 6                | 0              | -1.417700               | -2.229050 | 0.190526  |
| 13               | 6                | 0              | 1.579596                | -1.184086 | -0.318750 |
| 14               | 6                | 0              | 2.800245                | -0.527881 | 0.051859  |
| 15               | 6                | 0              | 2.891196                | 0.847195  | 0.413167  |
| 16               | 6                | 0              | 4.098930                | 1.398862  | 0.770130  |
| 17               | 6                | 0              | 5.276222                | 0.613842  | 0.785570  |
| 18               | 6                | 0              | 5.225360                | -0.706408 | 0.416389  |
| 19               | 6                | 0              | 3.996386                | -1.301452 | 0.031083  |
| 20               | 7                | 0              | 4.030353                | -2.606242 | -0.365865 |
| 21               | 6                | 0              | 2.910346                | -3.152059 | -0.757259 |
| 22               | 6                | 0              | 1.656325                | -2.483398 | -0.750753 |
| 23               | 6                | 0              | -1.167020               | 2.323149  | -0.926060 |
| 24               | 6                | 0              | -1.819749               | 3.069877  | 0.061524  |
| 25               | 6                | 0              | -1.197677               | 4.168451  | 0.648586  |
| 26               | 6                | 0              | 0.072445                | 4.562543  | 0.232733  |
| 27               | 6                | 0              | 0.709976                | 3.862465  | -0.789089 |
| 28               | 6                | 0              | 0.091402                | 2.754544  | -1.362758 |
| 29               | 6                | 0              | -1.836514               | 1.177901  | -1.659011 |
| 30               | 1                | 0              | 0.862315                | 0.167755  | 1.592251  |
| 31               | 1                | 0              | 0.471809                | 0.512641  | -0.860067 |
| 32               | 1                | 0              | -0.745841               | -1.435401 | -1.745103 |
| 33               | 1                | 0              | -4.047421               | -0.266868 | -1.830563 |
| 34               | 1                | 0              | -2.713996               | -0.862214 | -2.835511 |
| 35               | 1                | 0              | -2.845856               | -3.029825 | -1.894186 |
| 36               | 1                | 0              | -4.458112               | -2.519875 | -1.395008 |
| 37               | 1                | 0              | -3.610864               | 0.907787  | 0.173500  |
| 38               | 1                | 0              | -2.115624               | 0.537788  | 1.061161  |
| 39               | 1                | 0              | -4.614381               | -1.096731 | 0.649427  |
| 40               | 1                | 0              | -4.211969               | -1.982328 | 2.817729  |

|    |   |   |           |           |           |
|----|---|---|-----------|-----------|-----------|
| 41 | 1 | 0 | -2.596797 | -0.998358 | 4.296712  |
| 42 | 1 | 0 | -1.774071 | -0.101183 | 2.908961  |
| 43 | 1 | 0 | -3.259403 | -3.278209 | 0.631545  |
| 44 | 1 | 0 | -0.975503 | -3.166552 | -0.151246 |
| 45 | 1 | 0 | -1.061852 | -2.045924 | 1.208922  |
| 46 | 1 | 0 | 2.011836  | 1.487533  | 0.385373  |
| 47 | 1 | 0 | 4.150493  | 2.450160  | 1.037930  |
| 48 | 1 | 0 | 6.219452  | 1.064559  | 1.077909  |
| 49 | 1 | 0 | 6.110957  | -1.333539 | 0.396789  |
| 50 | 1 | 0 | 2.960646  | -4.186757 | -1.090339 |
| 51 | 1 | 0 | 0.787423  | -3.036494 | -1.087255 |
| 52 | 1 | 0 | -2.828447 | 2.821782  | 0.374192  |
| 53 | 1 | 0 | -1.717304 | 4.727848  | 1.420100  |
| 54 | 1 | 0 | 0.550836  | 5.425390  | 0.685572  |
| 55 | 1 | 0 | 1.684183  | 4.180186  | -1.148471 |
| 56 | 1 | 0 | 0.595749  | 2.229141  | -2.172261 |
| 57 | 1 | 0 | -2.808305 | 1.512810  | -2.035310 |
| 58 | 1 | 0 | -1.233388 | 0.882647  | -2.523616 |

## C2-D

Zero-point correction= 0.507686 (Hartree/Particle)  
Thermal correction to Energy= 0.531191  
Thermal correction to Enthalpy= 0.532135  
Thermal correction to Gibbs Free Energy= 0.454731  
E(sof) = -1192.62935513 A.U.

| Center<br>Number | Atomic<br>Number | Atomic<br>Type | Coordinates (Angstroms) |           |           |
|------------------|------------------|----------------|-------------------------|-----------|-----------|
|                  |                  |                | X                       | Y         | Z         |
| 1                | 8                | 0              | 0.641701                | -0.203164 | 1.581305  |
| 2                | 6                | 0              | -0.296269               | -0.263271 | 0.535310  |
| 3                | 6                | 0              | 0.024273                | 0.751789  | -0.582502 |
| 4                | 7                | 0              | 1.407695                | 0.577115  | -1.233243 |
| 5                | 6                | 0              | 1.386105                | 1.397274  | -2.513204 |
| 6                | 6                | 0              | 0.957993                | 2.846671  | -2.232155 |
| 7                | 6                | 0              | 2.513120                | 1.134590  | -0.365498 |
| 8                | 6                | 0              | 2.327769                | 2.649214  | -0.139288 |
| 9                | 6                | 0              | 2.469818                | 3.077874  | 1.302476  |
| 10               | 6                | 0              | 2.762039                | 2.329927  | 2.367004  |
| 11               | 6                | 0              | 0.964103                | 3.077689  | -0.720550 |
| 12               | 6                | 0              | -0.123252               | 2.209278  | -0.099399 |
| 13               | 6                | 0              | -1.740576               | -0.052604 | 0.960614  |
| 14               | 6                | 0              | -2.806751               | -0.452471 | 0.094640  |
| 15               | 6                | 0              | -2.627645               | -1.158487 | -1.127621 |

|    |   |   |           |           |           |
|----|---|---|-----------|-----------|-----------|
| 16 | 6 | 0 | -3.704397 | -1.502715 | -1.908815 |
| 17 | 6 | 0 | -5.019081 | -1.158385 | -1.512496 |
| 18 | 6 | 0 | -5.228415 | -0.494694 | -0.330497 |
| 19 | 6 | 0 | -4.135117 | -0.136447 | 0.501496  |
| 20 | 7 | 0 | -4.422413 | 0.494001  | 1.675959  |
| 21 | 6 | 0 | -3.425081 | 0.799239  | 2.464220  |
| 22 | 6 | 0 | -2.062959 | 0.548268  | 2.150044  |
| 23 | 6 | 0 | 2.194358  | -1.867981 | -0.645815 |
| 24 | 6 | 0 | 3.498175  | -1.822596 | -0.138355 |
| 25 | 6 | 0 | 3.951725  | -2.800241 | 0.741809  |
| 26 | 6 | 0 | 3.118787  | -3.857790 | 1.102910  |
| 27 | 6 | 0 | 1.840089  | -3.946665 | 0.558523  |
| 28 | 6 | 0 | 1.387004  | -2.960928 | -0.313709 |
| 29 | 6 | 0 | 1.709143  | -0.863939 | -1.666516 |
| 30 | 1 | 0 | 0.516434  | 0.603333  | 2.106196  |
| 31 | 1 | 0 | -0.206929 | -1.275855 | 0.147098  |
| 32 | 1 | 0 | -0.666574 | 0.565941  | -1.411729 |
| 33 | 1 | 0 | 2.401429  | 1.343244  | -2.914118 |
| 34 | 1 | 0 | 0.715268  | 0.883918  | -3.206998 |
| 35 | 1 | 0 | -0.042484 | 3.034590  | -2.633473 |
| 36 | 1 | 0 | 1.645389  | 3.531871  | -2.736390 |
| 37 | 1 | 0 | 3.443798  | 0.928219  | -0.898867 |
| 38 | 1 | 0 | 2.495639  | 0.553885  | 0.552600  |
| 39 | 1 | 0 | 3.103009  | 3.183369  | -0.706749 |
| 40 | 1 | 0 | 2.325474  | 4.148902  | 1.450599  |
| 41 | 1 | 0 | 2.852425  | 2.788581  | 3.346769  |
| 42 | 1 | 0 | 2.951925  | 1.259974  | 2.323640  |
| 43 | 1 | 0 | 0.783184  | 4.133242  | -0.497434 |
| 44 | 1 | 0 | -1.121130 | 2.566387  | -0.370340 |
| 45 | 1 | 0 | -0.056020 | 2.268290  | 0.992536  |
| 46 | 1 | 0 | -1.633055 | -1.463934 | -1.444595 |
| 47 | 1 | 0 | -3.548776 | -2.052817 | -2.832075 |
| 48 | 1 | 0 | -5.859692 | -1.435119 | -2.140771 |
| 49 | 1 | 0 | -6.223625 | -0.231234 | 0.013589  |
| 50 | 1 | 0 | -3.676425 | 1.281581  | 3.406610  |
| 51 | 1 | 0 | -1.310304 | 0.835053  | 2.879345  |
| 52 | 1 | 0 | 4.183517  | -1.037079 | -0.443409 |
| 53 | 1 | 0 | 4.963774  | -2.745237 | 1.130419  |
| 54 | 1 | 0 | 3.475060  | -4.622453 | 1.785964  |
| 55 | 1 | 0 | 1.197196  | -4.785724 | 0.804674  |
| 56 | 1 | 0 | 0.396803  | -3.062230 | -0.755344 |
| 57 | 1 | 0 | 2.466063  | -0.751956 | -2.448775 |
| 58 | 1 | 0 | 0.788291  | -1.214819 | -2.144189 |

# INT1-R-A

Zero-point correction= 0.718649 (Hartree/Particle)  
Thermal correction to Energy= 0.757193  
Thermal correction to Enthalpy= 0.758137  
Thermal correction to Gibbs Free Energy= 0.644645  
E(sof) = -2280.52368238 A.U.

| Center<br>Number | Atomic<br>Number | Atomic<br>Type | Coordinates (Angstroms) |           |           |
|------------------|------------------|----------------|-------------------------|-----------|-----------|
|                  |                  |                | X                       | Y         | Z         |
| 1                | 6                | 0              | -7.701189               | -0.134783 | -0.581587 |
| 2                | 6                | 0              | -6.453435               | 0.166773  | -0.025738 |
| 3                | 6                | 0              | -5.721666               | -0.828510 | 0.653182  |
| 4                | 6                | 0              | -6.285896               | -2.106587 | 0.747871  |
| 5                | 6                | 0              | -7.520522               | -2.403594 | 0.180509  |
| 6                | 6                | 0              | -8.232208               | -1.414895 | -0.491762 |
| 7                | 1                | 0              | -8.250731               | 0.651218  | -1.088018 |
| 8                | 1                | 0              | -5.730893               | -2.870003 | 1.284416  |
| 9                | 1                | 0              | -7.926693               | -3.407046 | 0.268106  |
| 10               | 1                | 0              | -9.197350               | -1.634479 | -0.937168 |
| 11               | 16               | 0              | -4.168585               | -0.549373 | 1.489658  |
| 12               | 6                | 0              | -5.941983               | 1.559230  | -0.193989 |
| 13               | 8                | 0              | -4.790899               | 1.898873  | -0.305787 |
| 14               | 6                | 0              | -2.945954               | -0.591257 | 0.070155  |
| 15               | 6                | 0              | -2.795582               | -2.010111 | -0.505528 |
| 16               | 6                | 0              | -1.593836               | -0.301747 | 0.630850  |
| 17               | 1                | 0              | -3.322995               | 0.139168  | -0.646804 |
| 18               | 6                | 0              | -1.683032               | -2.649188 | 0.333920  |
| 19               | 1                | 0              | -2.457925               | -1.913405 | -1.544801 |
| 20               | 1                | 0              | -3.733367               | -2.573983 | -0.511374 |
| 21               | 6                | 0              | -0.882642               | -1.447630 | 0.817970  |
| 22               | 1                | 0              | -1.294436               | 0.680431  | 0.982626  |
| 23               | 1                | 0              | -2.080660               | -3.189395 | 1.203012  |
| 24               | 1                | 0              | -1.061878               | -3.352903 | -0.232739 |
| 25               | 8                | 0              | 0.315290                | -1.613364 | 1.318940  |
| 26               | 8                | 0              | 1.379731                | 0.563378  | 1.764584  |
| 27               | 6                | 0              | 1.590415                | 1.039658  | 0.481519  |
| 28               | 6                | 0              | 3.035867                | 0.728050  | -0.009915 |
| 29               | 7                | 0              | 3.329635                | -0.765443 | -0.242906 |
| 30               | 6                | 0              | 4.608467                | -0.853056 | -1.037295 |
| 31               | 6                | 0              | 5.709519                | 0.001880  | -0.389418 |
| 32               | 6                | 0              | 3.544418                | -1.470310 | 1.080384  |
| 33               | 6                | 0              | 4.854412                | -0.986439 | 1.734207  |
| 34               | 6                | 0              | 4.764340                | -0.832238 | 3.234175  |

|    |   |   |          |           |           |
|----|---|---|----------|-----------|-----------|
| 35 | 6 | 0 | 3.684121 | -0.503200 | 3.938556  |
| 36 | 6 | 0 | 5.282352 | 0.329412  | 1.043416  |
| 37 | 6 | 0 | 4.080504 | 1.269361  | 0.982447  |
| 38 | 6 | 0 | 1.445494 | 2.555070  | 0.433547  |
| 39 | 6 | 0 | 1.369257 | 3.274481  | -0.798663 |
| 40 | 6 | 0 | 1.297170 | 2.659235  | -2.077989 |
| 41 | 6 | 0 | 1.233513 | 3.414627  | -3.222055 |
| 42 | 6 | 0 | 1.238648 | 4.827147  | -3.149500 |
| 43 | 6 | 0 | 1.282200 | 5.451113  | -1.929998 |
| 44 | 6 | 0 | 1.336465 | 4.695861  | -0.729861 |
| 45 | 7 | 0 | 1.346748 | 5.386802  | 0.446232  |
| 46 | 6 | 0 | 1.365605 | 4.684917  | 1.552062  |
| 47 | 6 | 0 | 1.417169 | 3.269911  | 1.602246  |
| 48 | 6 | 0 | 2.407820 | -2.849604 | -1.391209 |
| 49 | 6 | 0 | 3.037609 | -3.228667 | -2.579603 |
| 50 | 6 | 0 | 3.188615 | -4.574750 | -2.898258 |
| 51 | 6 | 0 | 2.701488 | -5.552096 | -2.033100 |
| 52 | 6 | 0 | 2.052402 | -5.181359 | -0.857657 |
| 53 | 6 | 0 | 1.898499 | -3.835185 | -0.537369 |
| 54 | 6 | 0 | 2.191572 | -1.404654 | -1.026836 |
| 55 | 1 | 0 | 0.845458 | -0.354945 | 1.671937  |
| 56 | 1 | 0 | 0.853428 | 0.614947  | -0.217236 |
| 57 | 1 | 0 | 3.179156 | 1.168652  | -1.003138 |
| 58 | 1 | 0 | 4.870892 | -1.912672 | -1.070614 |
| 59 | 1 | 0 | 4.372587 | -0.527703 | -2.054040 |
| 60 | 1 | 0 | 5.860639 | 0.926364  | -0.955979 |
| 61 | 1 | 0 | 6.652384 | -0.552559 | -0.404881 |
| 62 | 1 | 0 | 3.585671 | -2.537416 | 0.860060  |
| 63 | 1 | 0 | 2.658145 | -1.269691 | 1.676194  |
| 64 | 1 | 0 | 5.637281 | -1.728471 | 1.526915  |
| 65 | 1 | 0 | 5.712124 | -0.969944 | 3.753387  |
| 66 | 1 | 0 | 3.751270 | -0.387114 | 5.015970  |
| 67 | 1 | 0 | 2.713172 | -0.318194 | 3.484791  |
| 68 | 1 | 0 | 6.105505 | 0.791294  | 1.596194  |
| 69 | 1 | 0 | 4.382244 | 2.270963  | 0.662667  |
| 70 | 1 | 0 | 3.617891 | 1.355852  | 1.970344  |
| 71 | 1 | 0 | 1.252352 | 1.576001  | -2.151087 |
| 72 | 1 | 0 | 1.162087 | 2.926838  | -4.189421 |
| 73 | 1 | 0 | 1.190833 | 5.412324  | -4.062561 |
| 74 | 1 | 0 | 1.265950 | 6.531832  | -1.833550 |
| 75 | 1 | 0 | 1.352008 | 5.250860  | 2.482289  |
| 76 | 1 | 0 | 1.431268 | 2.743128  | 2.549464  |
| 77 | 1 | 0 | 3.398971 | -2.468014 | -3.268688 |
| 78 | 1 | 0 | 3.676643 | -4.860362 | -3.824922 |
| 79 | 1 | 0 | 2.816053 | -6.602387 | -2.283137 |

|    |   |   |           |           |           |
|----|---|---|-----------|-----------|-----------|
| 80 | 1 | 0 | 1.653077  | -5.940550 | -0.192548 |
| 81 | 1 | 0 | 1.364894  | -3.520272 | 0.360063  |
| 82 | 1 | 0 | 2.068684  | -0.777007 | -1.916412 |
| 83 | 1 | 0 | 1.316872  | -1.339352 | -0.375906 |
| 84 | 8 | 0 | -6.950027 | 2.461771  | -0.245942 |
| 85 | 1 | 0 | -6.520687 | 3.321975  | -0.393678 |

## INT1-S-B

Zero-point correction= 0.720418 (Hartree/Particle)  
Thermal correction to Energy= 0.758590  
Thermal correction to Enthalpy= 0.759534  
Thermal correction to Gibbs Free Energy= 0.649767  
E(sof) = -2280.54312107 A.U.

| Center<br>Number | Atomic<br>Number | Atomic<br>Type | Coordinates (Angstroms) |           |           |
|------------------|------------------|----------------|-------------------------|-----------|-----------|
|                  |                  |                | X                       | Y         | Z         |
| 1                | 6                | 0              | 0.931409                | -4.110948 | 1.583840  |
| 2                | 6                | 0              | 0.146078                | -3.017546 | 1.213301  |
| 3                | 6                | 0              | -0.876935               | -3.198953 | 0.265589  |
| 4                | 6                | 0              | -1.096323               | -4.472556 | -0.269202 |
| 5                | 6                | 0              | -0.328700               | -5.560575 | 0.135252  |
| 6                | 6                | 0              | 0.690189                | -5.378709 | 1.066236  |
| 7                | 1                | 0              | 1.738263                | -3.944003 | 2.291601  |
| 8                | 1                | 0              | -1.873409               | -4.597139 | -1.017548 |
| 9                | 1                | 0              | -0.519723               | -6.543761 | -0.284693 |
| 10               | 1                | 0              | 1.300807                | -6.220409 | 1.379688  |
| 11               | 16               | 0              | -1.840827               | -1.830890 | -0.373343 |
| 12               | 6                | 0              | 0.475881                | -1.669273 | 1.831064  |
| 13               | 8                | 0              | 1.682468                | -1.323377 | 1.811328  |
| 14               | 6                | 0              | -3.146399               | -1.676915 | 0.950783  |
| 15               | 6                | 0              | -4.351843               | -2.596439 | 0.673711  |
| 16               | 6                | 0              | -3.749793               | -0.306615 | 0.896578  |
| 17               | 1                | 0              | -2.614649               | -1.886634 | 1.879759  |
| 18               | 6                | 0              | -5.318680               | -1.734600 | -0.157181 |
| 19               | 1                | 0              | -4.821283               | -2.834649 | 1.635037  |
| 20               | 1                | 0              | -4.069546               | -3.535786 | 0.191412  |
| 21               | 6                | 0              | -4.933867               | -0.341165 | 0.268943  |
| 22               | 1                | 0              | -3.248376               | 0.570776  | 1.285796  |
| 23               | 1                | 0              | -5.158616               | -1.850997 | -1.236755 |
| 24               | 1                | 0              | -6.373253               | -1.944845 | 0.045514  |
| 25               | 8                | 0              | -5.788290               | 0.659427  | -0.030166 |

|    |   |   |           |           |           |
|----|---|---|-----------|-----------|-----------|
| 26 | 8 | 0 | 0.331170  | 1.378699  | 1.861097  |
| 27 | 6 | 0 | 0.026221  | 1.402624  | 0.504836  |
| 28 | 6 | 0 | 1.149987  | 2.148687  | -0.248449 |
| 29 | 7 | 0 | 2.437644  | 1.322966  | -0.449883 |
| 30 | 6 | 0 | 3.316500  | 2.081266  | -1.411932 |
| 31 | 6 | 0 | 3.530538  | 3.528985  | -0.937632 |
| 32 | 6 | 0 | 3.174049  | 1.167277  | 0.863203  |
| 33 | 6 | 0 | 3.686058  | 2.535808  | 1.348703  |
| 34 | 6 | 0 | 3.496699  | 2.765477  | 2.827951  |
| 35 | 6 | 0 | 2.862406  | 1.985412  | 3.698812  |
| 36 | 6 | 0 | 3.026909  | 3.646222  | 0.500999  |
| 37 | 6 | 0 | 1.513819  | 3.451823  | 0.494181  |
| 38 | 6 | 0 | -1.307305 | 2.099190  | 0.241477  |
| 39 | 6 | 0 | -2.025567 | 1.917606  | -0.978845 |
| 40 | 6 | 0 | -1.534242 | 1.182499  | -2.089588 |
| 41 | 6 | 0 | -2.301468 | 0.998900  | -3.211104 |
| 42 | 6 | 0 | -3.608085 | 1.535197  | -3.281669 |
| 43 | 6 | 0 | -4.122064 | 2.233630  | -2.221149 |
| 44 | 6 | 0 | -3.346789 | 2.438530  | -1.051009 |
| 45 | 7 | 0 | -3.942521 | 3.093672  | -0.009929 |
| 46 | 6 | 0 | -3.225975 | 3.288367  | 1.073434  |
| 47 | 6 | 0 | -1.904271 | 2.816230  | 1.247198  |
| 48 | 6 | 0 | 3.287539  | -0.886850 | -1.434160 |
| 49 | 6 | 0 | 3.851117  | -0.788655 | -2.710209 |
| 50 | 6 | 0 | 4.915593  | -1.605261 | -3.076098 |
| 51 | 6 | 0 | 5.416307  | -2.538392 | -2.170092 |
| 52 | 6 | 0 | 4.840946  | -2.660735 | -0.908209 |
| 53 | 6 | 0 | 3.774664  | -1.844508 | -0.537763 |
| 54 | 6 | 0 | 2.102673  | -0.046562 | -1.030279 |
| 55 | 1 | 0 | 0.013254  | 0.474955  | 2.211526  |
| 56 | 1 | 0 | -0.104901 | 0.382719  | 0.118339  |
| 57 | 1 | 0 | 0.823156  | 2.355851  | -1.274058 |
| 58 | 1 | 0 | 4.252793  | 1.523573  | -1.464893 |
| 59 | 1 | 0 | 2.832527  | 2.029402  | -2.391398 |
| 60 | 1 | 0 | 2.986221  | 4.226403  | -1.582263 |
| 61 | 1 | 0 | 4.593520  | 3.778329  | -1.005583 |
| 62 | 1 | 0 | 3.995693  | 0.475165  | 0.668938  |
| 63 | 1 | 0 | 2.467757  | 0.682700  | 1.536378  |
| 64 | 1 | 0 | 4.767076  | 2.593456  | 1.150440  |
| 65 | 1 | 0 | 3.951655  | 3.690278  | 3.185537  |
| 66 | 1 | 0 | 2.806624  | 2.277012  | 4.743240  |
| 67 | 1 | 0 | 2.375900  | 1.051845  | 3.431703  |
| 68 | 1 | 0 | 3.281902  | 4.626581  | 0.915733  |
| 69 | 1 | 0 | 1.016693  | 4.292329  | 0.000752  |
| 70 | 1 | 0 | 1.147178  | 3.382127  | 1.521024  |

|    |   |   |           |           |           |
|----|---|---|-----------|-----------|-----------|
| 71 | 1 | 0 | -0.557667 | 0.715727  | -2.031896 |
| 72 | 1 | 0 | -1.913761 | 0.417425  | -4.041661 |
| 73 | 1 | 0 | -4.207708 | 1.373572  | -4.171912 |
| 74 | 1 | 0 | -5.130682 | 2.633656  | -2.230263 |
| 75 | 1 | 0 | -3.719987 | 3.813274  | 1.889165  |
| 76 | 1 | 0 | -1.395444 | 2.932254  | 2.197366  |
| 77 | 1 | 0 | 3.445580  | -0.080127 | -3.429628 |
| 78 | 1 | 0 | 5.345316  | -1.522067 | -4.069457 |
| 79 | 1 | 0 | 6.244693  | -3.179405 | -2.455802 |
| 80 | 1 | 0 | 5.213871  | -3.404011 | -0.210595 |
| 81 | 1 | 0 | 3.286449  | -1.950928 | 0.431270  |
| 82 | 1 | 0 | 1.455846  | 0.155381  | -1.889730 |
| 83 | 1 | 0 | 1.551214  | -0.572773 | -0.251778 |
| 84 | 8 | 0 | -0.479882 | -0.996846 | 2.301471  |
| 85 | 1 | 0 | -5.384978 | 1.516444  | 0.202901  |

#### INT1-R-A

Zero-point correction= 0.719391 (Hartree/Particle)  
Thermal correction to Energy= 0.757813  
Thermal correction to Enthalpy= 0.758758  
Thermal correction to Gibbs Free Energy= 0.648548  
E(sof) = -2280.54501531 A.U.

| Center<br>Number | Atomic<br>Number | Atomic<br>Type | Coordinates (Angstroms) |           |           |
|------------------|------------------|----------------|-------------------------|-----------|-----------|
|                  |                  |                | X                       | Y         | Z         |
| 1                | 6                | 0              | 3.785533                | 2.287987  | -1.927502 |
| 2                | 6                | 0              | 2.554484                | 2.029567  | -1.317723 |
| 3                | 6                | 0              | 2.177526                | 2.787888  | -0.198157 |
| 4                | 6                | 0              | 3.020673                | 3.806851  | 0.259566  |
| 5                | 6                | 0              | 4.214976                | 4.090606  | -0.392254 |
| 6                | 6                | 0              | 4.602406                | 3.321828  | -1.488235 |
| 7                | 1                | 0              | 4.083071                | 1.662501  | -2.763868 |
| 8                | 1                | 0              | 2.732694                | 4.367926  | 1.144258  |
| 9                | 1                | 0              | 4.850894                | 4.894082  | -0.032775 |
| 10               | 1                | 0              | 5.543786                | 3.522509  | -1.991195 |
| 11               | 16               | 0              | 0.686735                | 2.438447  | 0.731489  |
| 12               | 6                | 0              | 1.717556                | 0.898685  | -1.897914 |
| 13               | 8                | 0              | 2.287450                | -0.208618 | -2.015567 |
| 14               | 6                | 0              | -0.420470               | 3.841361  | 0.220499  |
| 15               | 6                | 0              | -0.721414               | 3.871334  | -1.290624 |
| 16               | 6                | 0              | -1.765345               | 3.604273  | 0.844286  |
| 17               | 1                | 0              | 0.077312                | 4.752905  | 0.564445  |



|    |   |   |           |           |           |
|----|---|---|-----------|-----------|-----------|
| 18 | 6 | 0 | -2.015720 | 3.063942  | -1.453397 |
| 19 | 1 | 0 | 0.094702  | 3.475513  | -1.895679 |
| 20 | 1 | 0 | -0.902898 | 4.916103  | -1.567553 |
| 21 | 6 | 0 | -2.626894 | 3.162256  | -0.083896 |
| 22 | 1 | 0 | -1.965282 | 3.698214  | 1.906775  |
| 23 | 1 | 0 | -2.683366 | 3.456779  | -2.226218 |
| 24 | 1 | 0 | -1.804097 | 2.014470  | -1.697852 |
| 25 | 8 | 0 | -3.912454 | 2.779652  | 0.052512  |
| 26 | 8 | 0 | -0.749566 | -1.026741 | -1.974249 |
| 27 | 6 | 0 | -1.178394 | -0.830878 | -0.665707 |
| 28 | 6 | 0 | -0.844051 | -2.084075 | 0.186519  |
| 29 | 7 | 0 | 0.642964  | -2.257595 | 0.540160  |
| 30 | 6 | 0 | 0.728394  | -3.298507 | 1.624647  |
| 31 | 6 | 0 | -0.027846 | -4.572128 | 1.209129  |
| 32 | 6 | 0 | 1.420467  | -2.743612 | -0.663165 |
| 33 | 6 | 0 | 0.990430  | -4.170478 | -1.036542 |
| 34 | 6 | 0 | 0.861858  | -4.378692 | -2.525689 |
| 35 | 6 | 0 | 1.014982  | -3.470106 | -3.485673 |
| 36 | 6 | 0 | -0.321556 | -4.495978 | -0.290904 |
| 37 | 6 | 0 | -1.319539 | -3.364883 | -0.528476 |
| 38 | 6 | 0 | -2.692407 | -0.660159 | -0.584844 |
| 39 | 6 | 0 | -3.336542 | -0.165399 | 0.589781  |
| 40 | 6 | 0 | -2.638654 | 0.339095  | 1.719676  |
| 41 | 6 | 0 | -3.320268 | 0.842779  | 2.801272  |
| 42 | 6 | 0 | -4.736269 | 0.857936  | 2.812757  |
| 43 | 6 | 0 | -5.437972 | 0.383905  | 1.731765  |
| 44 | 6 | 0 | -4.759222 | -0.124189 | 0.594209  |
| 45 | 7 | 0 | -5.521108 | -0.524349 | -0.462750 |
| 46 | 6 | 0 | -4.887567 | -0.927601 | -1.535908 |
| 47 | 6 | 0 | -3.477676 | -1.011993 | -1.650819 |
| 48 | 6 | 0 | 2.591963  | -0.994841 | 1.623844  |
| 49 | 6 | 0 | 2.769327  | -1.221548 | 2.992197  |
| 50 | 6 | 0 | 4.044070  | -1.230762 | 3.547097  |
| 51 | 6 | 0 | 5.153340  | -0.996226 | 2.737135  |
| 52 | 6 | 0 | 4.981877  | -0.743840 | 1.378951  |
| 53 | 6 | 0 | 3.706717  | -0.738017 | 0.818116  |
| 54 | 6 | 0 | 1.210743  | -0.935509 | 1.025818  |
| 55 | 1 | 0 | -0.247761 | -0.183384 | -2.246520 |
| 56 | 1 | 0 | -0.715337 | 0.072845  | -0.243263 |
| 57 | 1 | 0 | -1.322049 | -1.978015 | 1.167558  |
| 58 | 1 | 0 | 1.792924  | -3.480379 | 1.784305  |
| 59 | 1 | 0 | 0.319831  | -2.848211 | 2.533617  |
| 60 | 1 | 0 | -0.964786 | -4.659711 | 1.768445  |
| 61 | 1 | 0 | 0.581932  | -5.448162 | 1.448430  |
| 62 | 1 | 0 | 2.475748  | -2.692311 | -0.389301 |

|    |   |   |           |           |           |
|----|---|---|-----------|-----------|-----------|
| 63 | 1 | 0 | 1.236526  | -2.007118 | -1.442388 |
| 64 | 1 | 0 | 1.749313  | -4.878726 | -0.671077 |
| 65 | 1 | 0 | 0.615970  | -5.404361 | -2.804268 |
| 66 | 1 | 0 | 0.892466  | -3.758341 | -4.525367 |
| 67 | 1 | 0 | 1.265809  | -2.428629 | -3.300500 |
| 68 | 1 | 0 | -0.727661 | -5.446508 | -0.650391 |
| 69 | 1 | 0 | -2.311966 | -3.631922 | -0.153845 |
| 70 | 1 | 0 | -1.396726 | -3.158924 | -1.599799 |
| 71 | 1 | 0 | -1.553290 | 0.391998  | 1.704164  |
| 72 | 1 | 0 | -2.770006 | 1.246665  | 3.645958  |
| 73 | 1 | 0 | -5.262714 | 1.253511  | 3.676268  |
| 74 | 1 | 0 | -6.522480 | 0.396276  | 1.697321  |
| 75 | 1 | 0 | -5.508842 | -1.222533 | -2.380145 |
| 76 | 1 | 0 | -3.010434 | -1.348229 | -2.569887 |
| 77 | 1 | 0 | 1.902615  | -1.373815 | 3.632405  |
| 78 | 1 | 0 | 4.170976  | -1.404961 | 4.611044  |
| 79 | 1 | 0 | 6.149226  | -0.993862 | 3.169875  |
| 80 | 1 | 0 | 5.842012  | -0.534091 | 0.750936  |
| 81 | 1 | 0 | 3.558892  | -0.519631 | -0.240228 |
| 82 | 1 | 0 | 0.486949  | -0.552446 | 1.752516  |
| 83 | 1 | 0 | 1.215861  | -0.285692 | 0.153837  |
| 84 | 8 | 0 | 0.525109  | 1.166855  | -2.207761 |
| 85 | 1 | 0 | -4.131974 | 2.701710  | 0.995793  |

## INT1-S-B

Zero-point correction= 0.718072 (Hartree/Particle)  
Thermal correction to Energy= 0.756800  
Thermal correction to Enthalpy= 0.757745  
Thermal correction to Gibbs Free Energy= 0.643008  
E(sof) = -2280.52572036 A.U.

| Center<br>Number | Atomic<br>Number | Atomic<br>Type | Coordinates (Angstroms) |           |           |
|------------------|------------------|----------------|-------------------------|-----------|-----------|
|                  |                  |                | X                       | Y         | Z         |
| 1                | 6                | 0              | 6.527930                | 0.057991  | -0.600615 |
| 2                | 6                | 0              | 5.278326                | -0.414885 | -0.184622 |
| 3                | 6                | 0              | 4.153626                | 0.433627  | -0.226602 |
| 4                | 6                | 0              | 4.334028                | 1.743501  | -0.689149 |
| 5                | 6                | 0              | 5.580827                | 2.208797  | -1.091861 |
| 6                | 6                | 0              | 6.685811                | 1.363952  | -1.045460 |
| 7                | 1                | 0              | 7.377972                | -0.614665 | -0.569344 |
| 8                | 1                | 0              | 3.465758                | 2.395442  | -0.723897 |
| 9                | 1                | 0              | 5.687958                | 3.231787  | -1.440461 |

|    |    |   |           |           |           |
|----|----|---|-----------|-----------|-----------|
| 10 | 1  | 0 | 7.663727  | 1.716822  | -1.356805 |
| 11 | 16 | 0 | 2.483165  | -0.054879 | 0.171024  |
| 12 | 6  | 0 | 5.192539  | -1.822303 | 0.303248  |
| 13 | 8  | 0 | 4.413706  | -2.258389 | 1.113106  |
| 14 | 6  | 0 | 2.386466  | -0.073115 | 2.068136  |
| 15 | 6  | 0 | 2.693972  | 1.318051  | 2.635161  |
| 16 | 6  | 0 | 0.947222  | -0.269832 | 2.383784  |
| 17 | 1  | 0 | 3.076561  | -0.857784 | 2.376024  |
| 18 | 6  | 0 | 1.356860  | 2.056717  | 2.533305  |
| 19 | 1  | 0 | 3.523316  | 1.821899  | 2.128797  |
| 20 | 1  | 0 | 2.969041  | 1.187139  | 3.688285  |
| 21 | 6  | 0 | 0.321209  | 0.934620  | 2.561580  |
| 22 | 1  | 0 | 0.457848  | -1.237972 | 2.363704  |
| 23 | 1  | 0 | 1.180051  | 2.779770  | 3.336047  |
| 24 | 1  | 0 | 1.281499  | 2.600428  | 1.580653  |
| 25 | 8  | 0 | -0.941674 | 1.223691  | 2.644650  |
| 26 | 8  | 0 | -2.463582 | -0.571405 | 1.811711  |
| 27 | 6  | 0 | -1.846787 | -1.006225 | 0.644330  |
| 28 | 6  | 0 | -2.527654 | -0.412702 | -0.617976 |
| 29 | 7  | 0 | -2.367385 | 1.111665  | -0.762744 |
| 30 | 6  | 0 | -2.727557 | 1.469558  | -2.180319 |
| 31 | 6  | 0 | -4.080726 | 0.847676  | -2.564250 |
| 32 | 6  | 0 | -3.323044 | 1.825524  | 0.169198  |
| 33 | 6  | 0 | -4.778098 | 1.613758  | -0.293610 |
| 34 | 6  | 0 | -5.753808 | 1.424003  | 0.843738  |
| 35 | 6  | 0 | -5.498803 | 0.872627  | 2.028260  |
| 36 | 6  | 0 | -4.799453 | 0.422618  | -1.280157 |
| 37 | 6  | 0 | -4.029377 | -0.740066 | -0.659259 |
| 38 | 6  | 0 | -1.935423 | -2.518129 | 0.502751  |
| 39 | 6  | 0 | -1.121029 | -3.233106 | -0.426753 |
| 40 | 6  | 0 | -0.076625 | -2.637154 | -1.184155 |
| 41 | 6  | 0 | 0.671803  | -3.385723 | -2.057219 |
| 42 | 6  | 0 | 0.410204  | -4.765803 | -2.225236 |
| 43 | 6  | 0 | -0.576226 | -5.373961 | -1.492712 |
| 44 | 6  | 0 | -1.354107 | -4.630144 | -0.567920 |
| 45 | 7  | 0 | -2.291814 | -5.305967 | 0.157026  |
| 46 | 6  | 0 | -2.977539 | -4.619337 | 1.037814  |
| 47 | 6  | 0 | -2.839460 | -3.225635 | 1.251622  |
| 48 | 6  | 0 | -0.621290 | 2.965884  | -0.700300 |
| 49 | 6  | 0 | -0.157558 | 3.432440  | -1.932909 |
| 50 | 6  | 0 | 0.146189  | 4.779560  | -2.107423 |
| 51 | 6  | 0 | -0.003392 | 5.668723  | -1.045561 |
| 52 | 6  | 0 | -0.440261 | 5.206946  | 0.194132  |
| 53 | 6  | 0 | -0.741855 | 3.859543  | 0.370292  |
| 54 | 6  | 0 | -0.928979 | 1.511295  | -0.466649 |

|    |   |   |           |           |           |
|----|---|---|-----------|-----------|-----------|
| 55 | 1 | 0 | -1.816521 | 0.113537  | 2.279773  |
| 56 | 1 | 0 | -0.784016 | -0.734048 | 0.643452  |
| 57 | 1 | 0 | -2.016826 | -0.805295 | -1.505224 |
| 58 | 1 | 0 | -2.745117 | 2.560722  | -2.223753 |
| 59 | 1 | 0 | -1.909907 | 1.116910  | -2.814491 |
| 60 | 1 | 0 | -3.932714 | -0.020552 | -3.214401 |
| 61 | 1 | 0 | -4.669593 | 1.581323  | -3.122580 |
| 62 | 1 | 0 | -3.053292 | 2.881492  | 0.141884  |
| 63 | 1 | 0 | -3.116163 | 1.430495  | 1.161967  |
| 64 | 1 | 0 | -5.094664 | 2.503804  | -0.854145 |
| 65 | 1 | 0 | -6.770686 | 1.743514  | 0.618383  |
| 66 | 1 | 0 | -6.294192 | 0.756946  | 2.758127  |
| 67 | 1 | 0 | -4.516398 | 0.501158  | 2.311708  |
| 68 | 1 | 0 | -5.832645 | 0.133635  | -1.493511 |
| 69 | 1 | 0 | -4.173452 | -1.659335 | -1.234154 |
| 70 | 1 | 0 | -4.382555 | -0.924857 | 0.360162  |
| 71 | 1 | 0 | 0.175565  | -1.590548 | -1.036095 |
| 72 | 1 | 0 | 1.484788  | -2.917565 | -2.603445 |
| 73 | 1 | 0 | 1.008672  | -5.345381 | -2.921445 |
| 74 | 1 | 0 | -0.788327 | -6.434786 | -1.578544 |
| 75 | 1 | 0 | -3.705541 | -5.178882 | 1.623781  |
| 76 | 1 | 0 | -3.434362 | -2.712342 | 1.998983  |
| 77 | 1 | 0 | -0.016128 | 2.734552  | -2.755462 |
| 78 | 1 | 0 | 0.509382  | 5.132782  | -3.067447 |
| 79 | 1 | 0 | 0.237104  | 6.718806  | -1.180689 |
| 80 | 1 | 0 | -0.531272 | 5.893402  | 1.029934  |
| 81 | 1 | 0 | -1.037798 | 3.470652  | 1.345000  |
| 82 | 1 | 0 | -0.300096 | 0.860197  | -1.082143 |
| 83 | 1 | 0 | -0.781165 | 1.285819  | 0.589319  |
| 84 | 8 | 0 | 6.138528  | -2.610265 | -0.259821 |
| 85 | 1 | 0 | 6.024336  | -3.485657 | 0.148736  |

---

## 14. NMR spectra and HPLC chromatograms

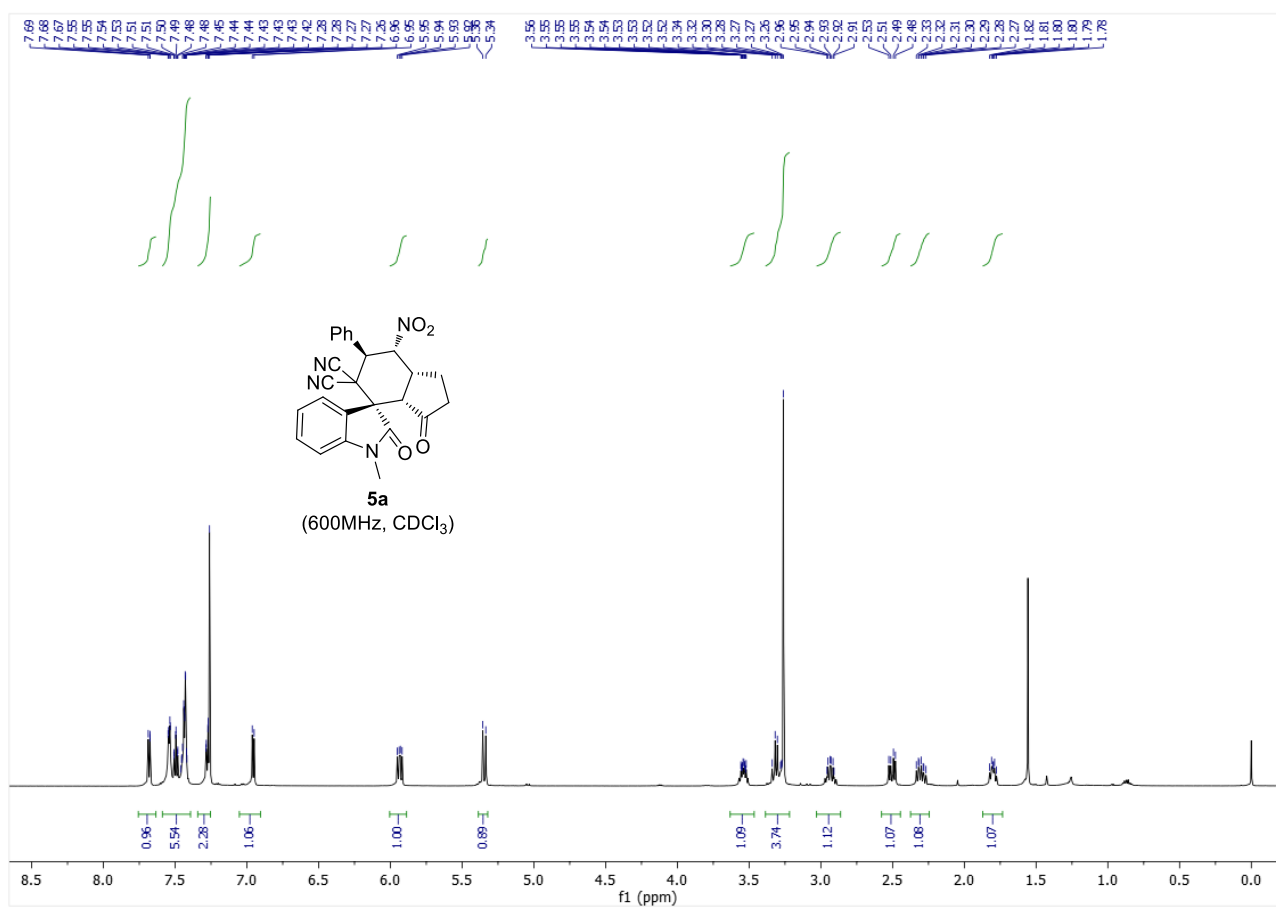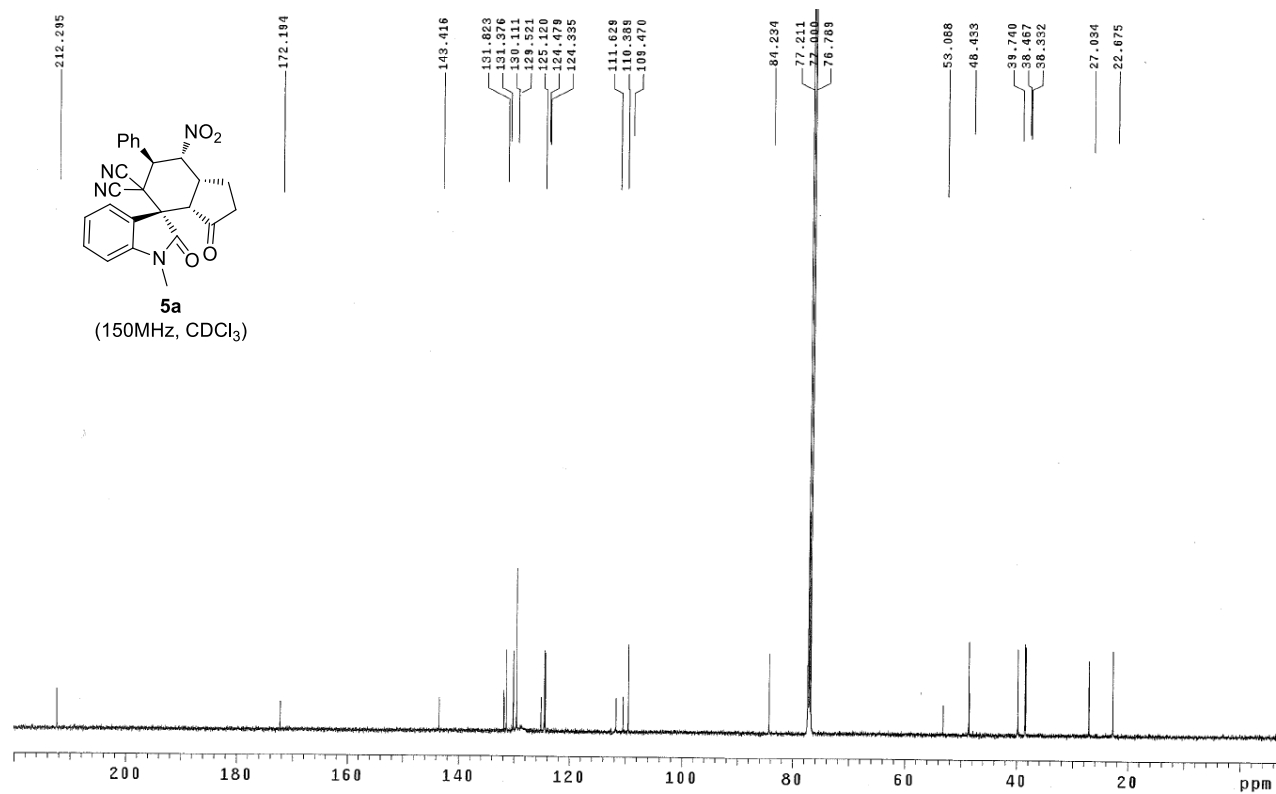

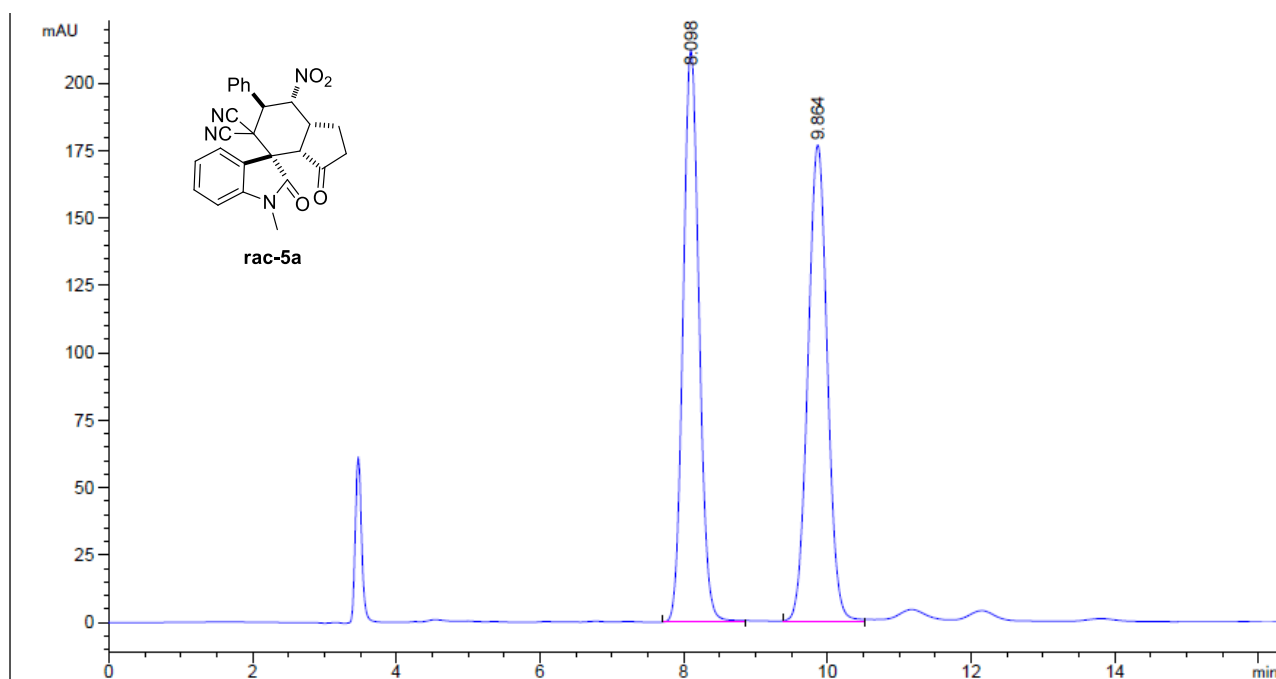

| # | [min] |     | [min]  | mAU        | *s | [mAU]     | %       |
|---|-------|-----|--------|------------|----|-----------|---------|
| 1 | 8.098 | BB  | 0.2386 | 3276.32104 |    | 211.90904 | 49.5837 |
| 2 | 9.864 | BBA | 0.2897 | 3331.33081 |    | 176.79614 | 50.4163 |

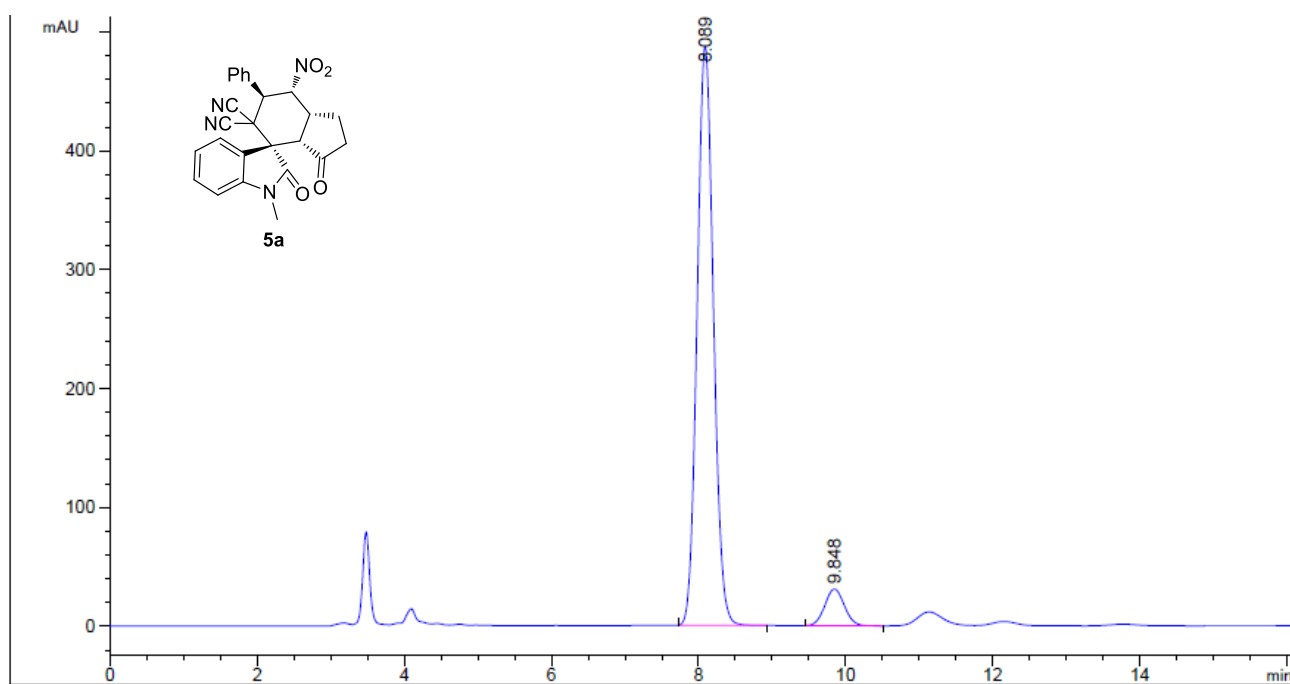

| # | [min] |    | [min]  | mAU        | *s | [mAU]     | %       |
|---|-------|----|--------|------------|----|-----------|---------|
| 1 | 8.089 | BB | 0.2381 | 7498.35596 |    | 486.27670 | 92.9415 |
| 2 | 9.848 | BB | 0.2914 | 569.46741  |    | 30.80433  | 7.0585  |

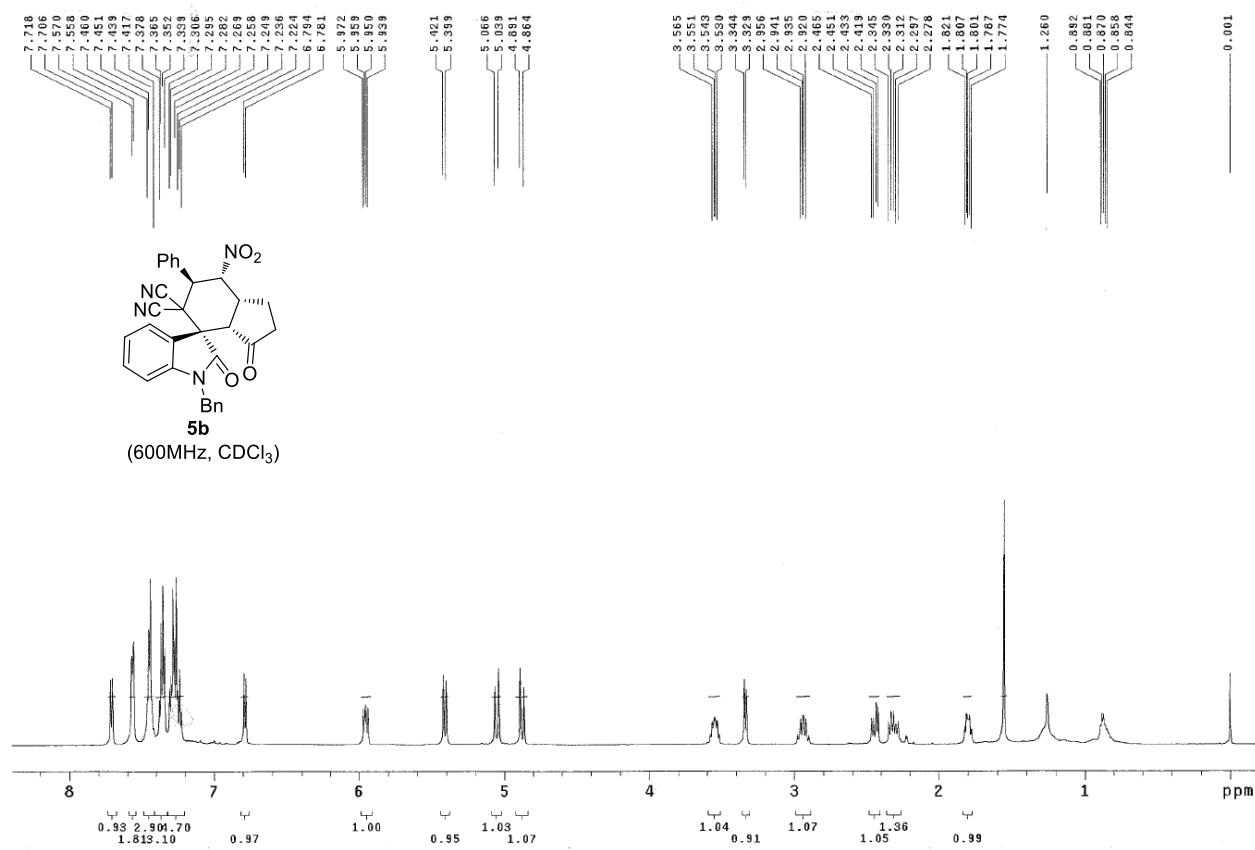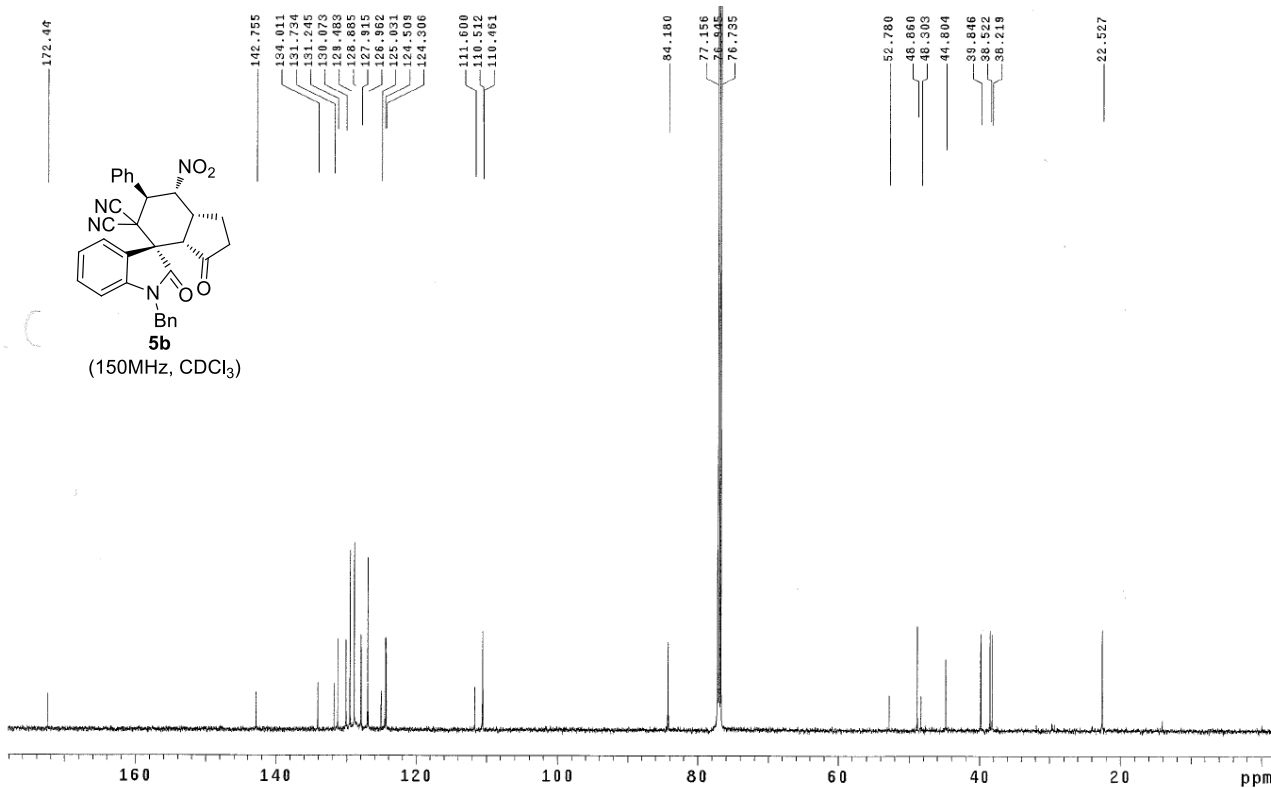

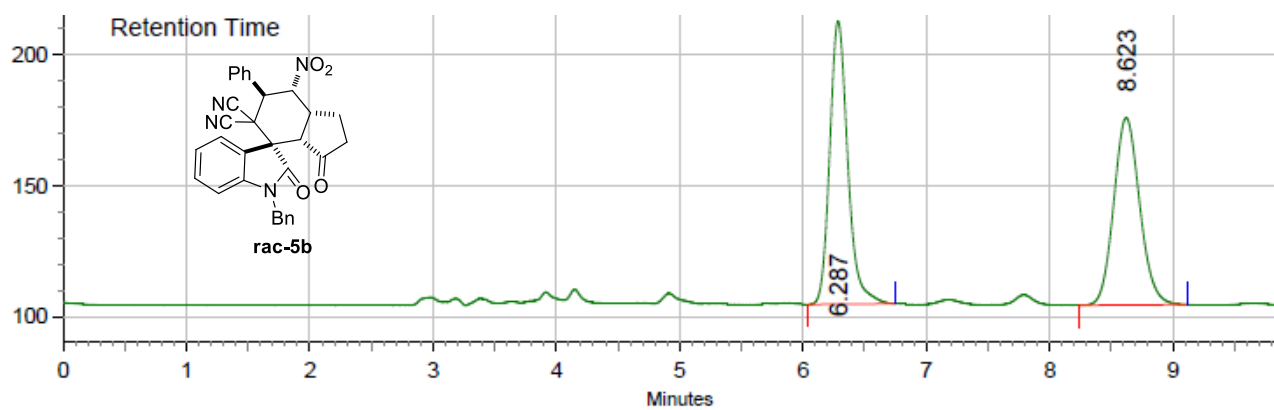

| Peak | RT (min) | Height  | % Height | Area     | % Area |
|------|----------|---------|----------|----------|--------|
| 1    | 6.287    | 1809114 | 60.18    | 18437039 | 51.25  |
| 2    | 8.623    | 1197170 | 39.82    | 17536246 | 48.75  |

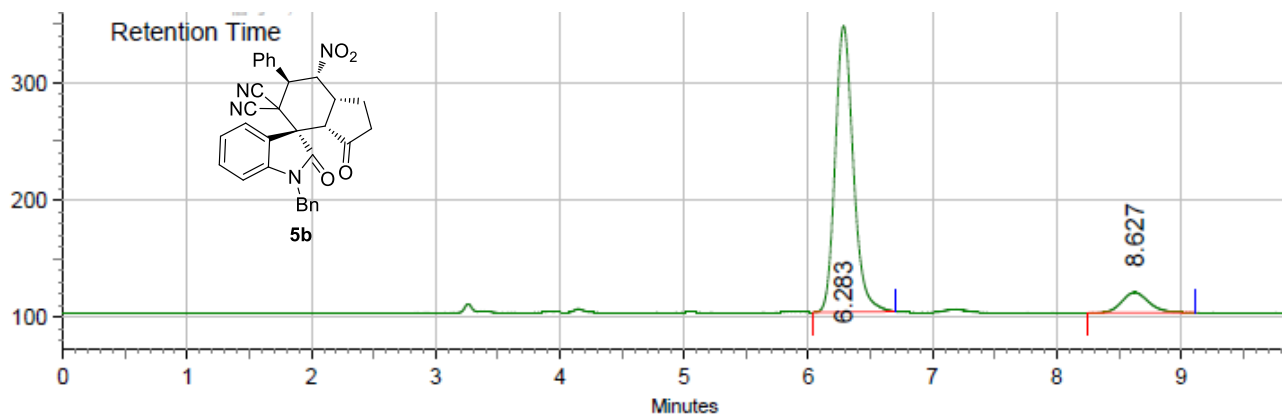

| Peak | RT (min) | Height  | % Height | Area     | % Area |
|------|----------|---------|----------|----------|--------|
| 1    | 6.283    | 4083472 | 93.42    | 41391473 | 90.52  |
| 2    | 8.627    | 287437  | 6.58     | 4332692  | 9.48   |



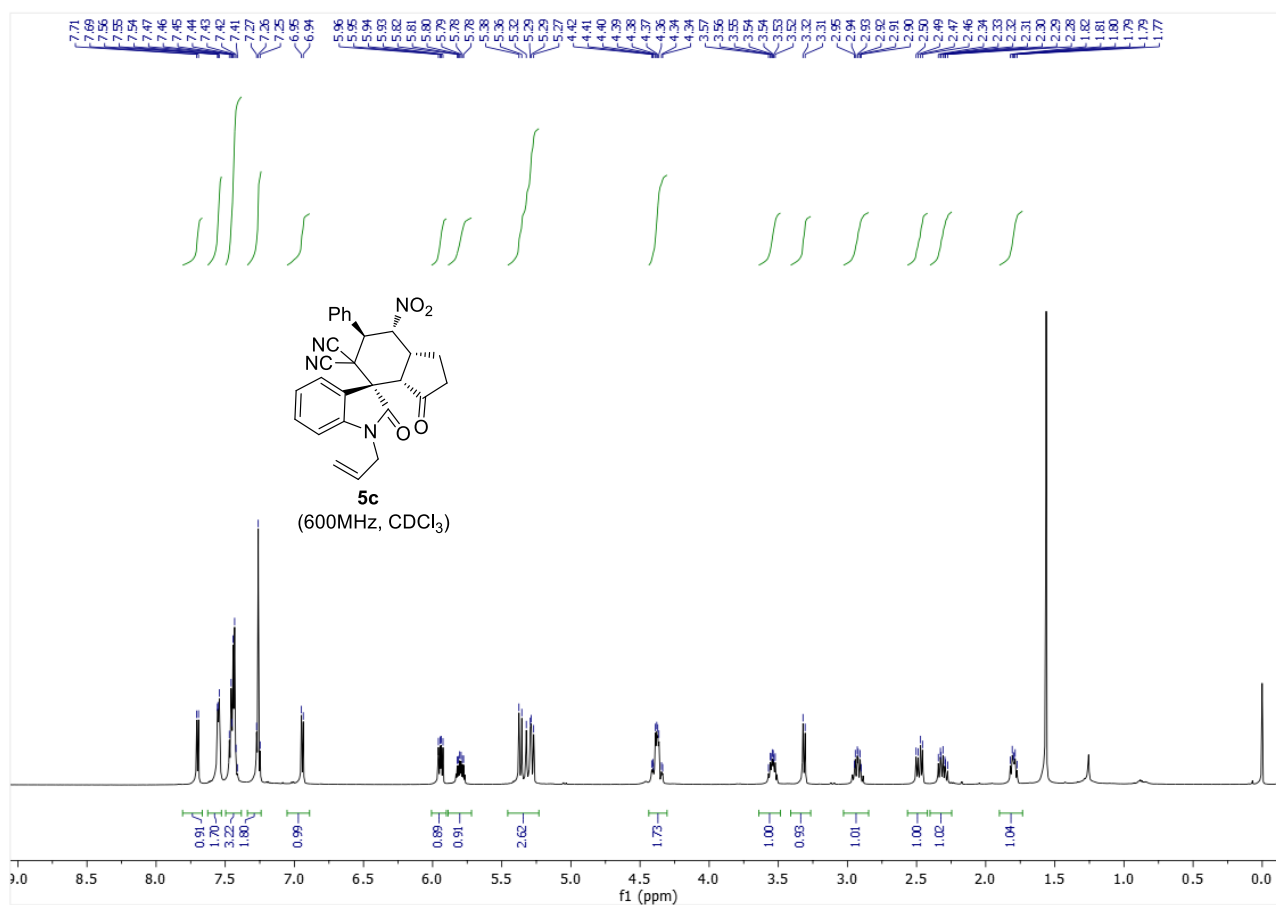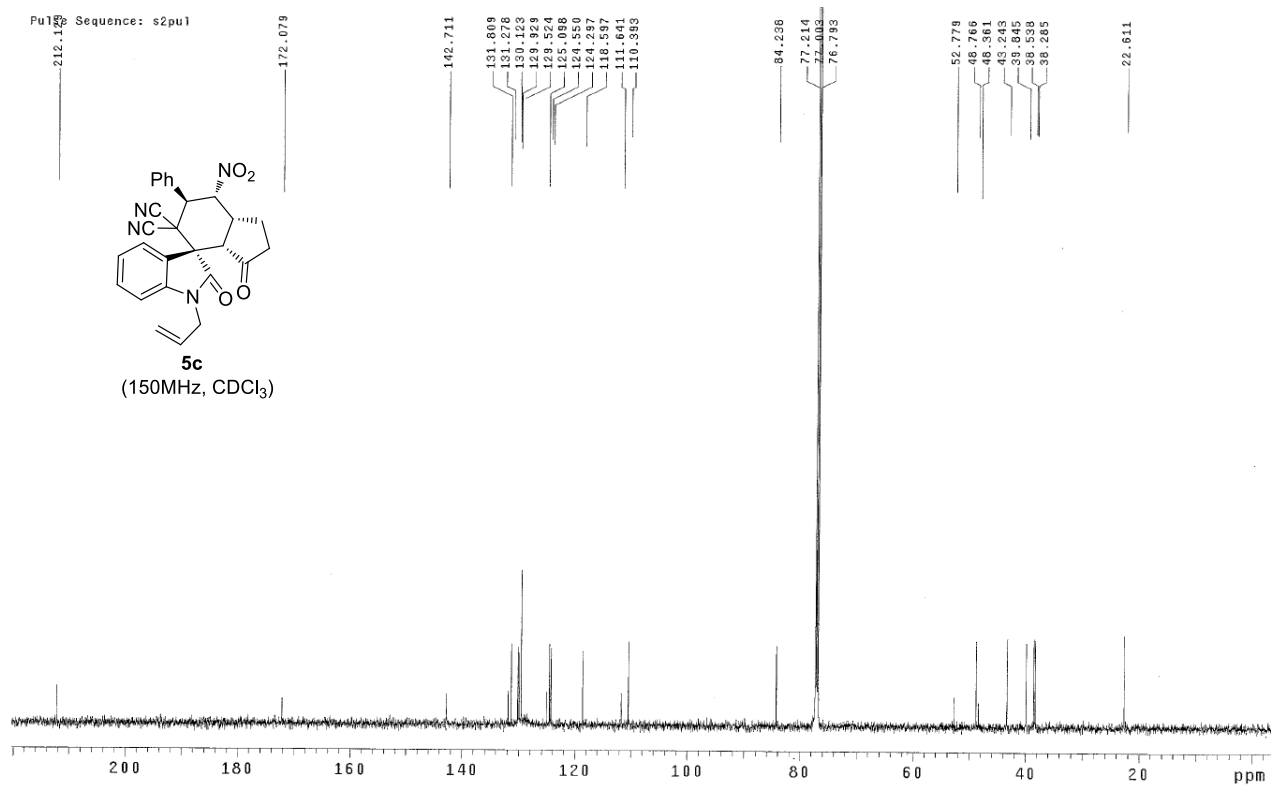

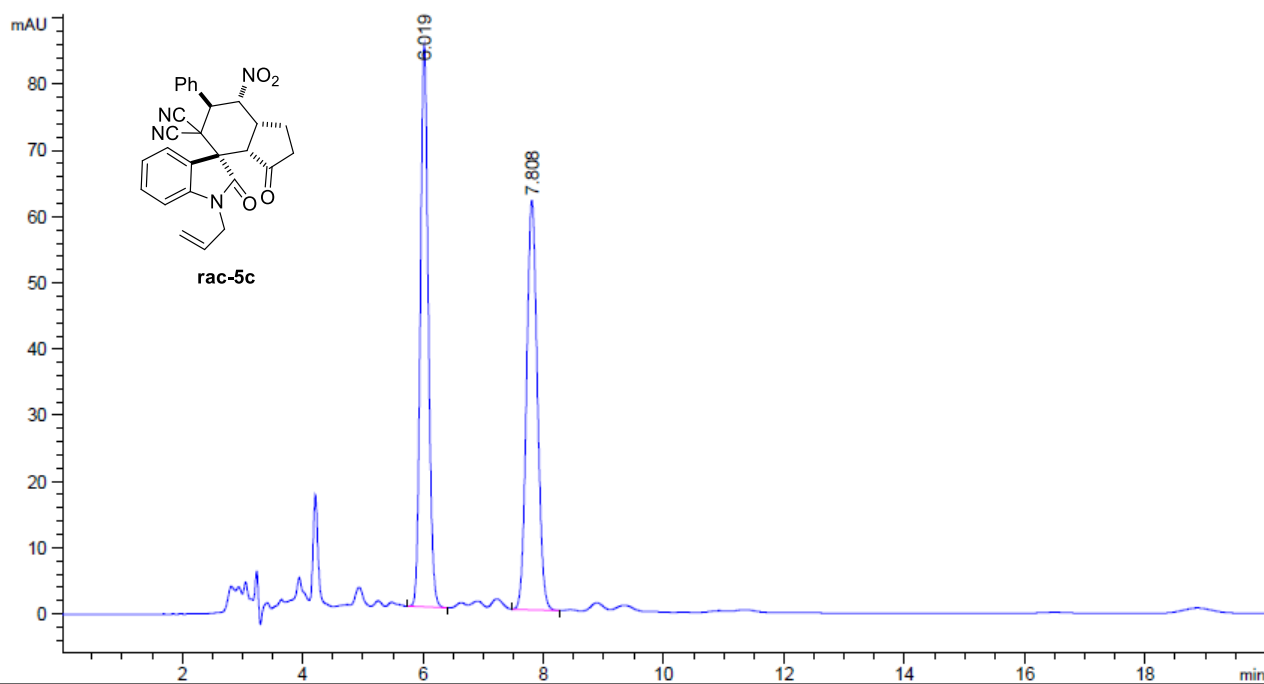

| Peak # | RetTime [min] | Type | Width [min] | Area [mAU*s] | Height [mAU] | Area %  |
|--------|---------------|------|-------------|--------------|--------------|---------|
| 1      | 6.019         | BB   | 0.1420      | 779.92871    | 85.01702     | 50.2002 |
| 2      | 7.808         | BB   | 0.1949      | 773.70929    | 61.88151     | 49.7998 |

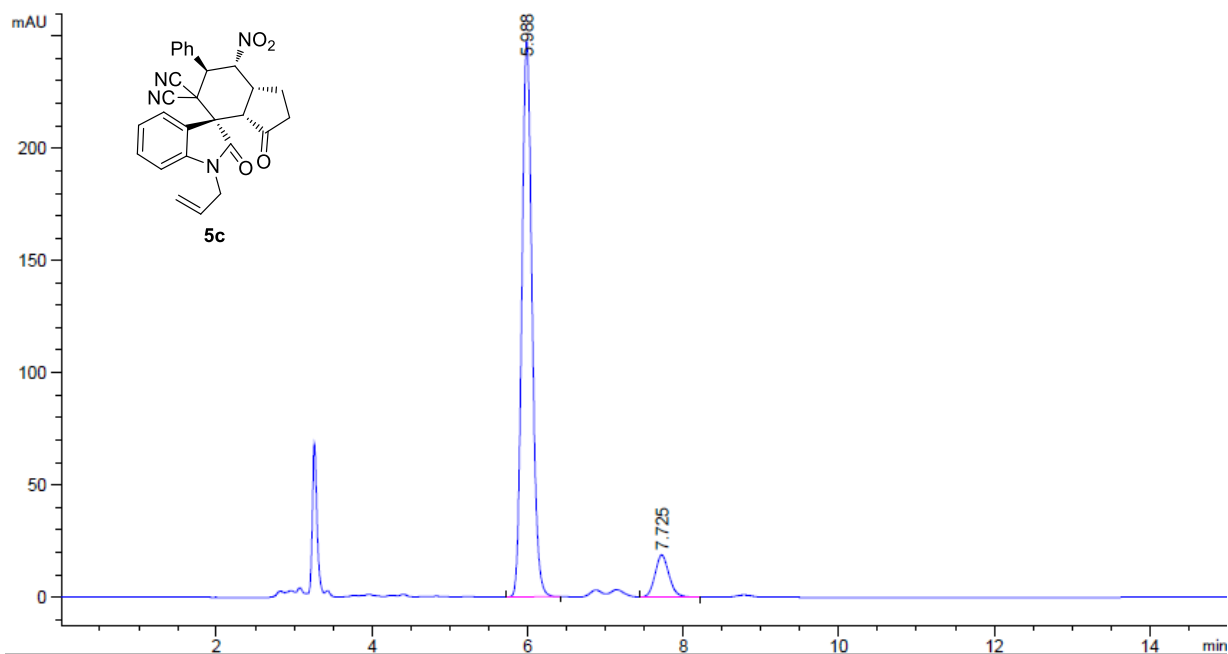

| Peak # | RetTime [min] | Type | Width [min] | Area [mAU*s] | Height [mAU] | Area %  |
|--------|---------------|------|-------------|--------------|--------------|---------|
| 1      | 5.988         | BB   | 0.1399      | 2248.15601   | 247.78429    | 90.5249 |
| 2      | 7.725         | VB   | 0.1933      | 235.31224    | 18.76380     | 9.4751  |

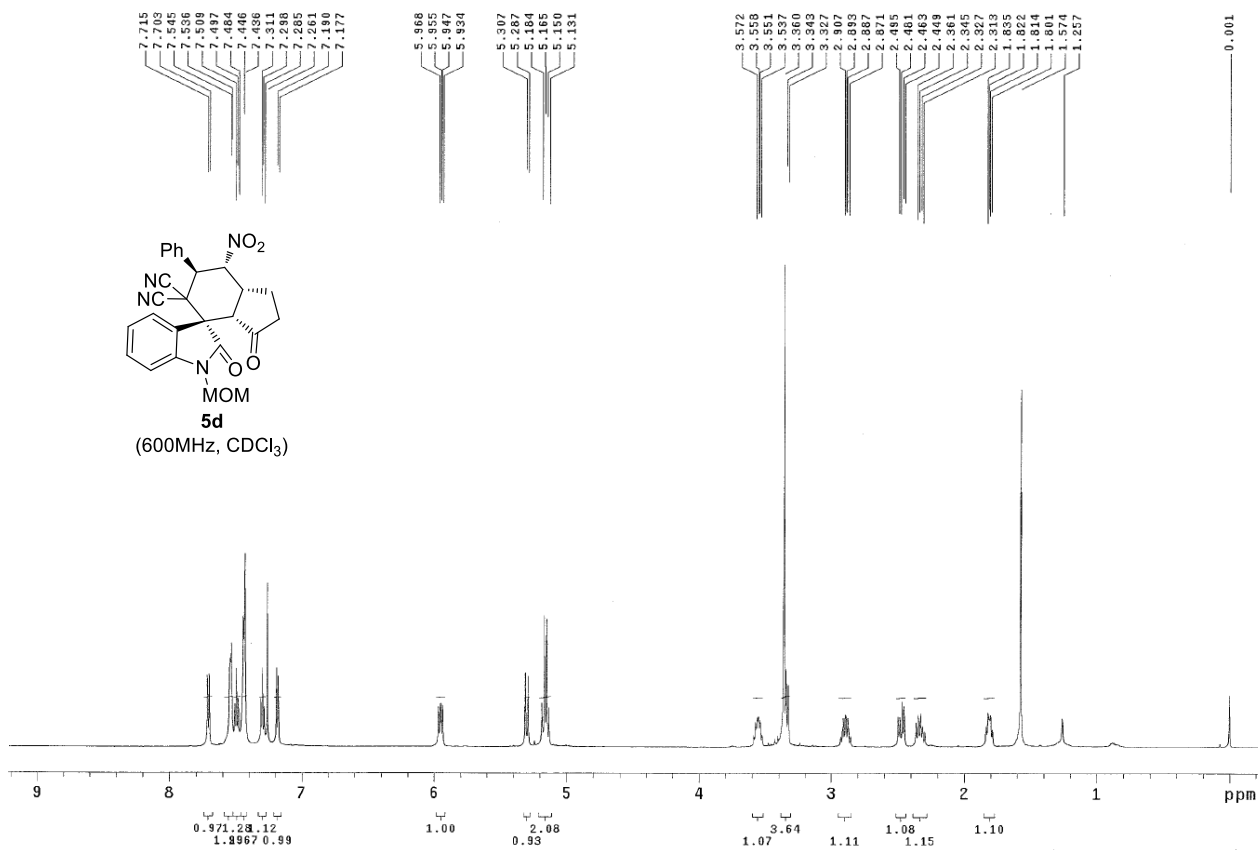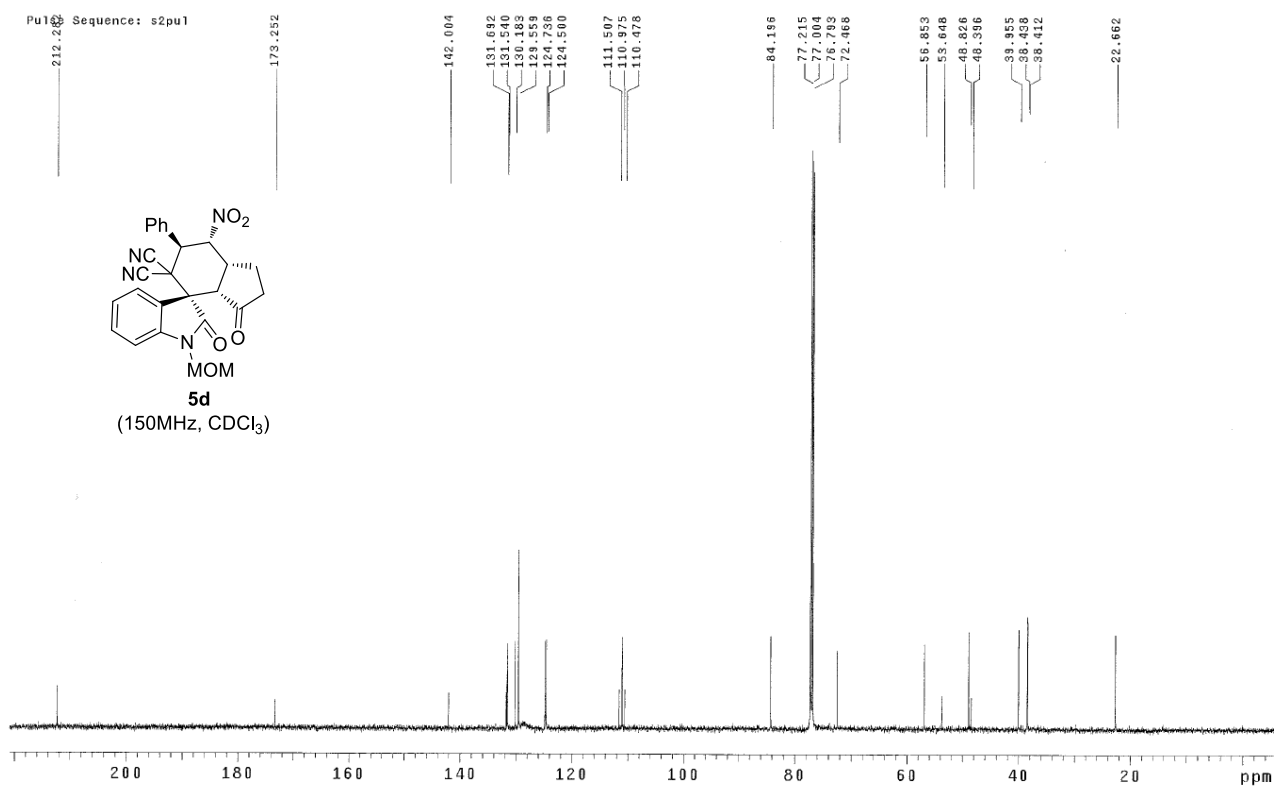

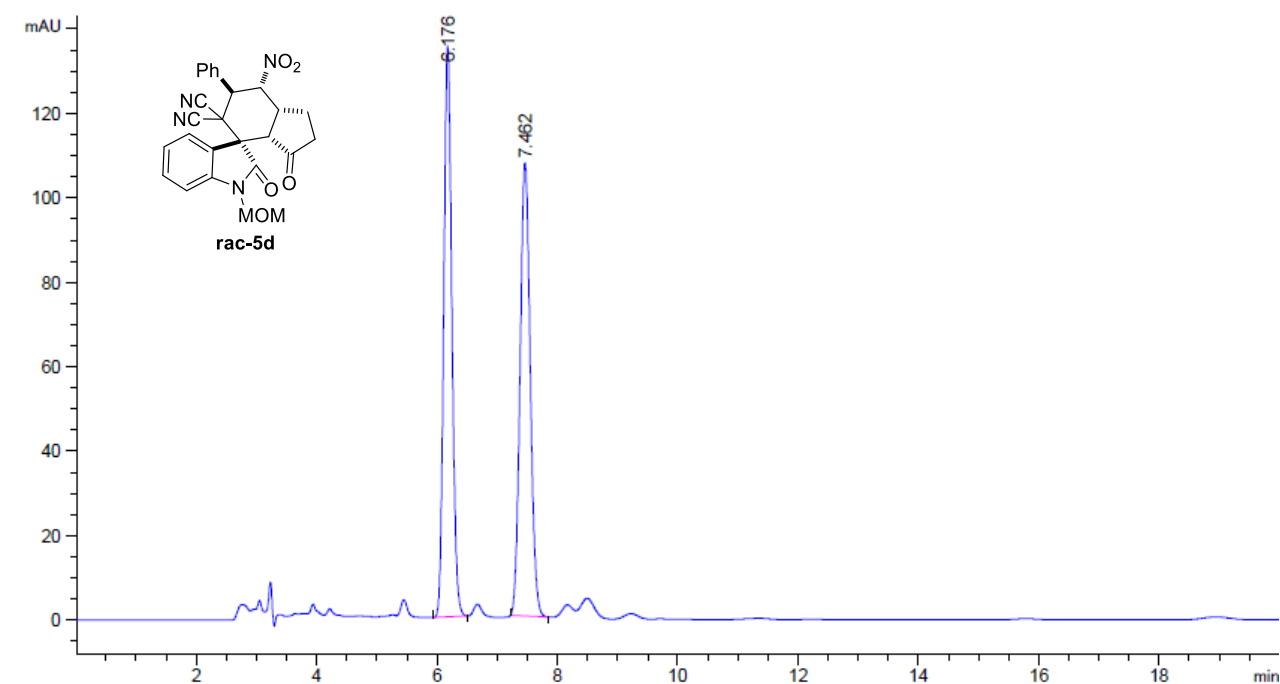

| Peak # | RetTime [min] | Type | Width [min] | Area [mAU*s] | Height [mAU] | Area %  |
|--------|---------------|------|-------------|--------------|--------------|---------|
| 1      | 6.176         | BB   | 0.1450      | 1264.97888   | 135.37314    | 50.1139 |
| 2      | 7.462         | BB   | 0.1828      | 1259.22888   | 107.40987    | 49.8861 |

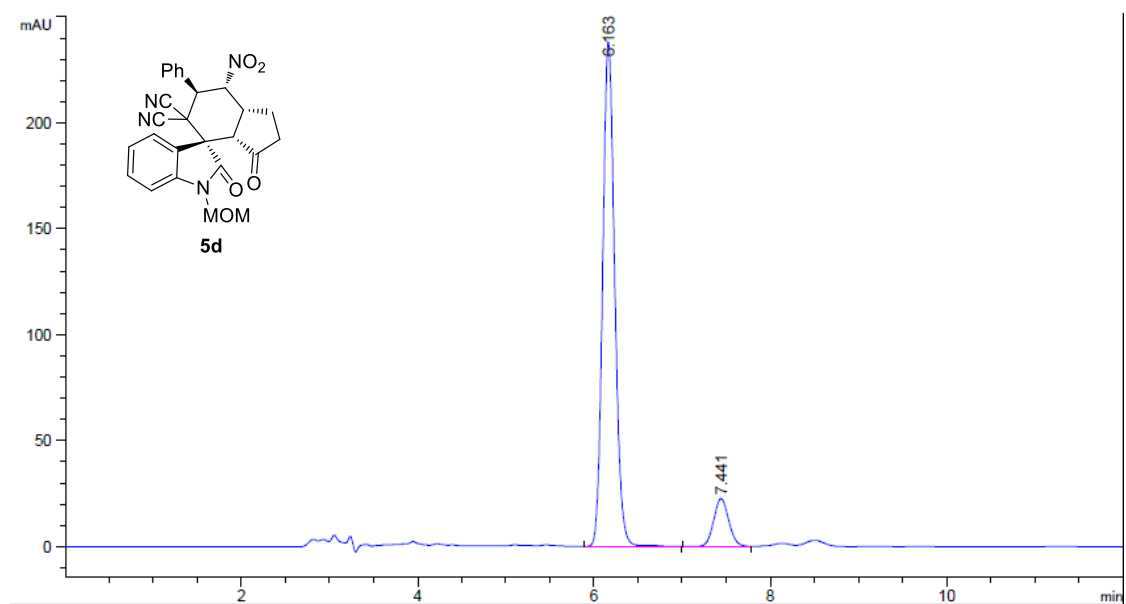

| Peak # | RetTime [min] | Type | Width [min] | Area [mAU*s] | Height [mAU] | Area %  |
|--------|---------------|------|-------------|--------------|--------------|---------|
| 1      | 6.163         | BV R | 0.1464      | 2251.74829   | 237.85497    | 89.5125 |
| 2      | 7.441         | BB   | 0.1831      | 263.82001    | 22.44286     | 10.4875 |

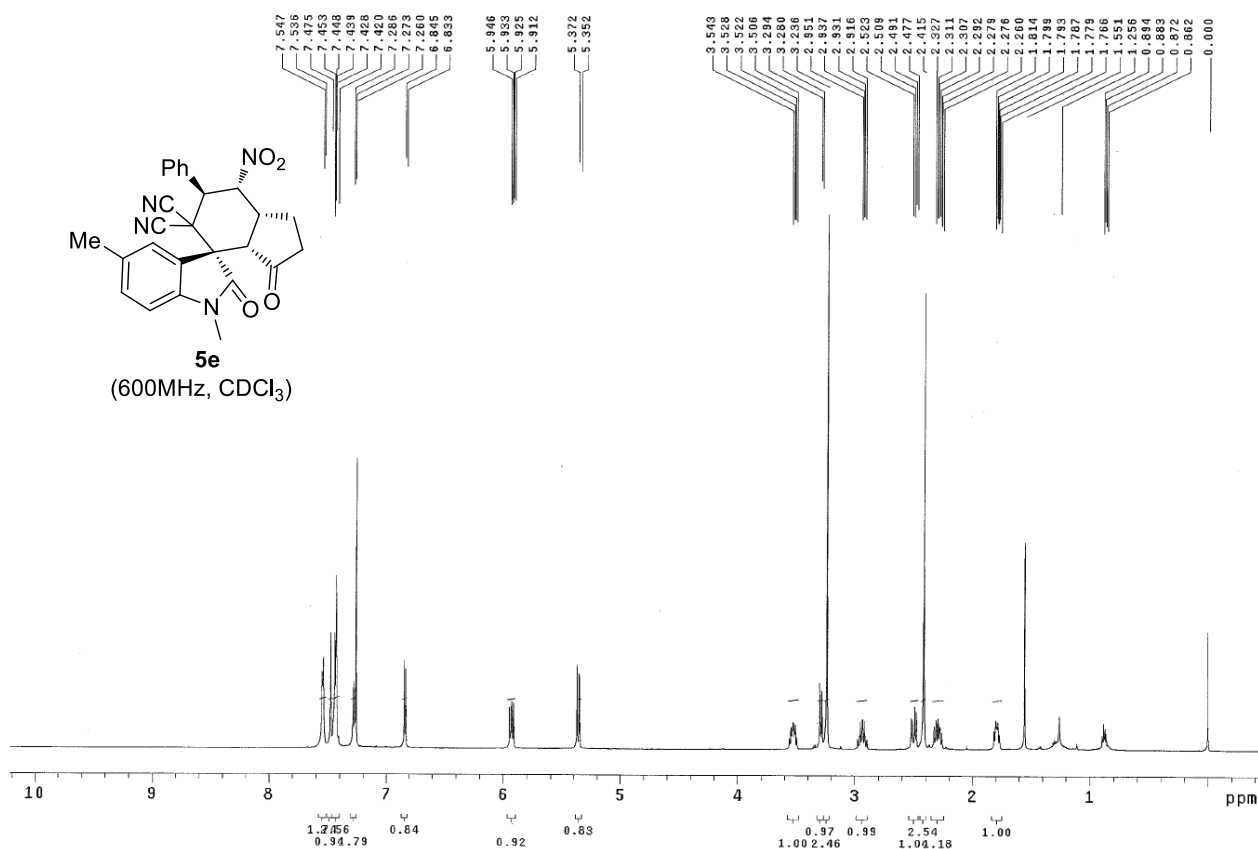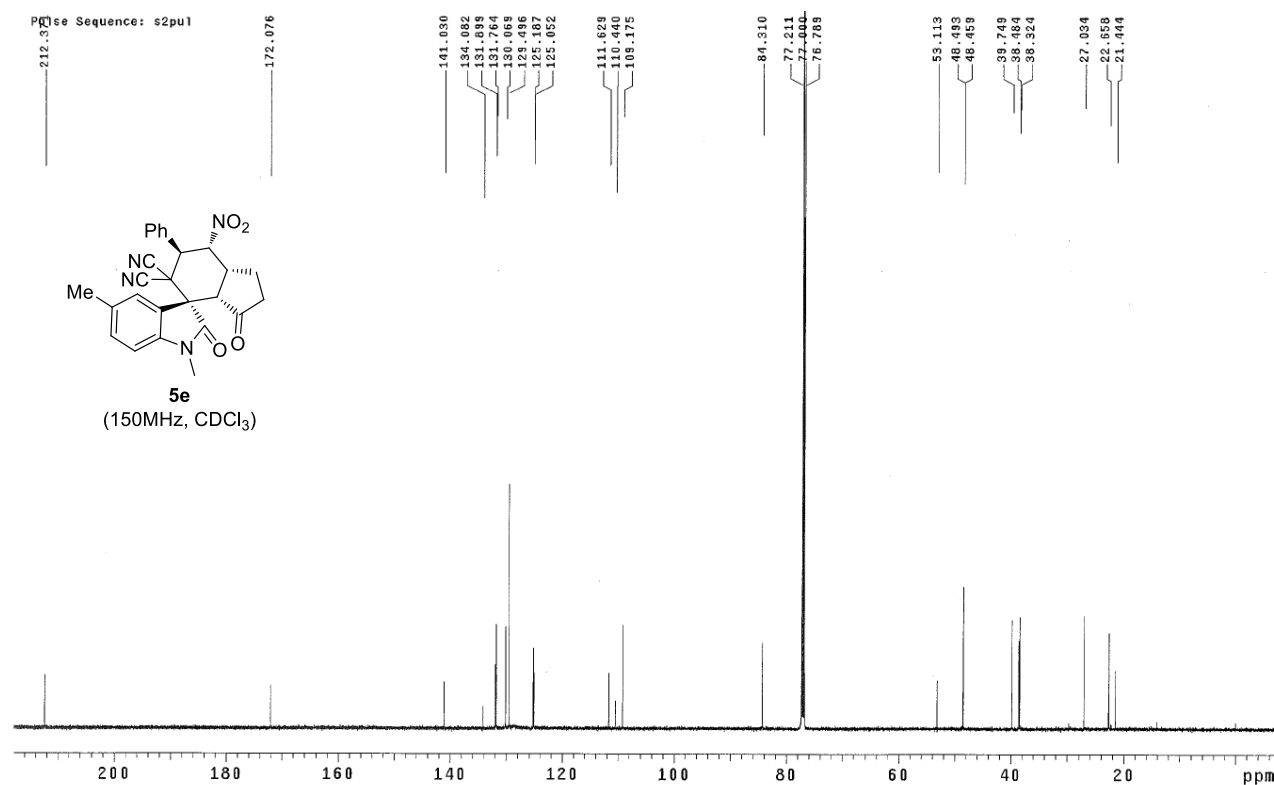

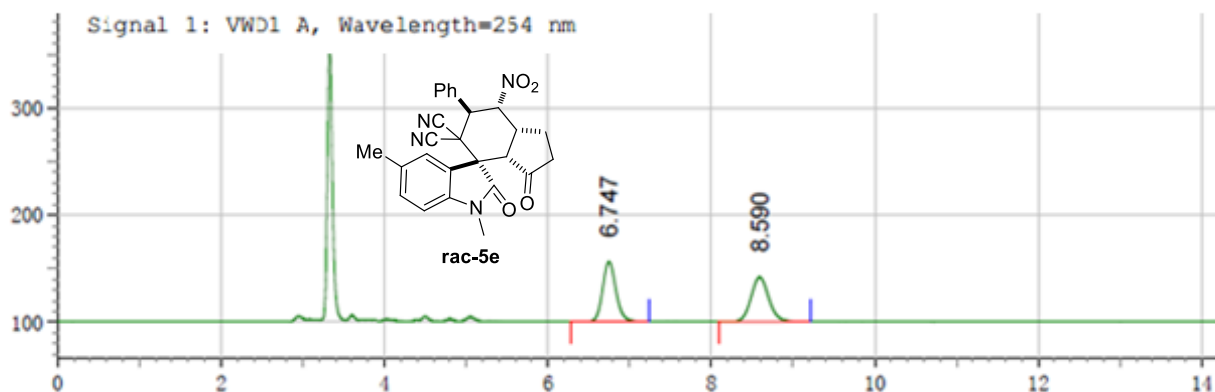

| Peak | RT (min) | Height | % Height | Area     | % Area |
|------|----------|--------|----------|----------|--------|
| 1    | 6.747    | 939051 | 57.45    | 10599081 | 50.29  |
| 2    | 8.590    | 695641 | 42.55    | 10476522 | 49.71  |

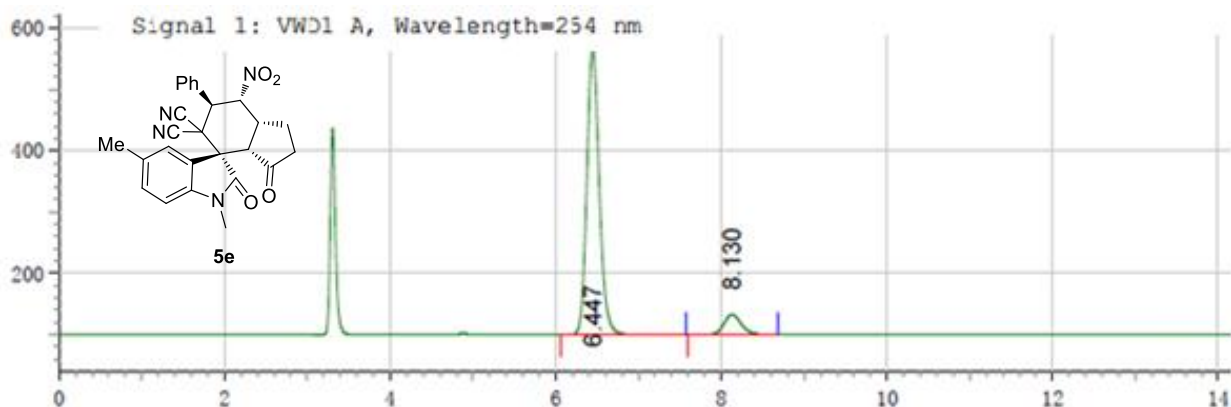

| Peak | RT (min) | Height  | % Height | Area     | % Area |
|------|----------|---------|----------|----------|--------|
| 1    | 6.447    | 7820298 | 93.40    | 81609694 | 90.95  |
| 2    | 8.130    | 552262  | 6.60     | 8122373  | 9.05   |

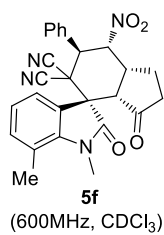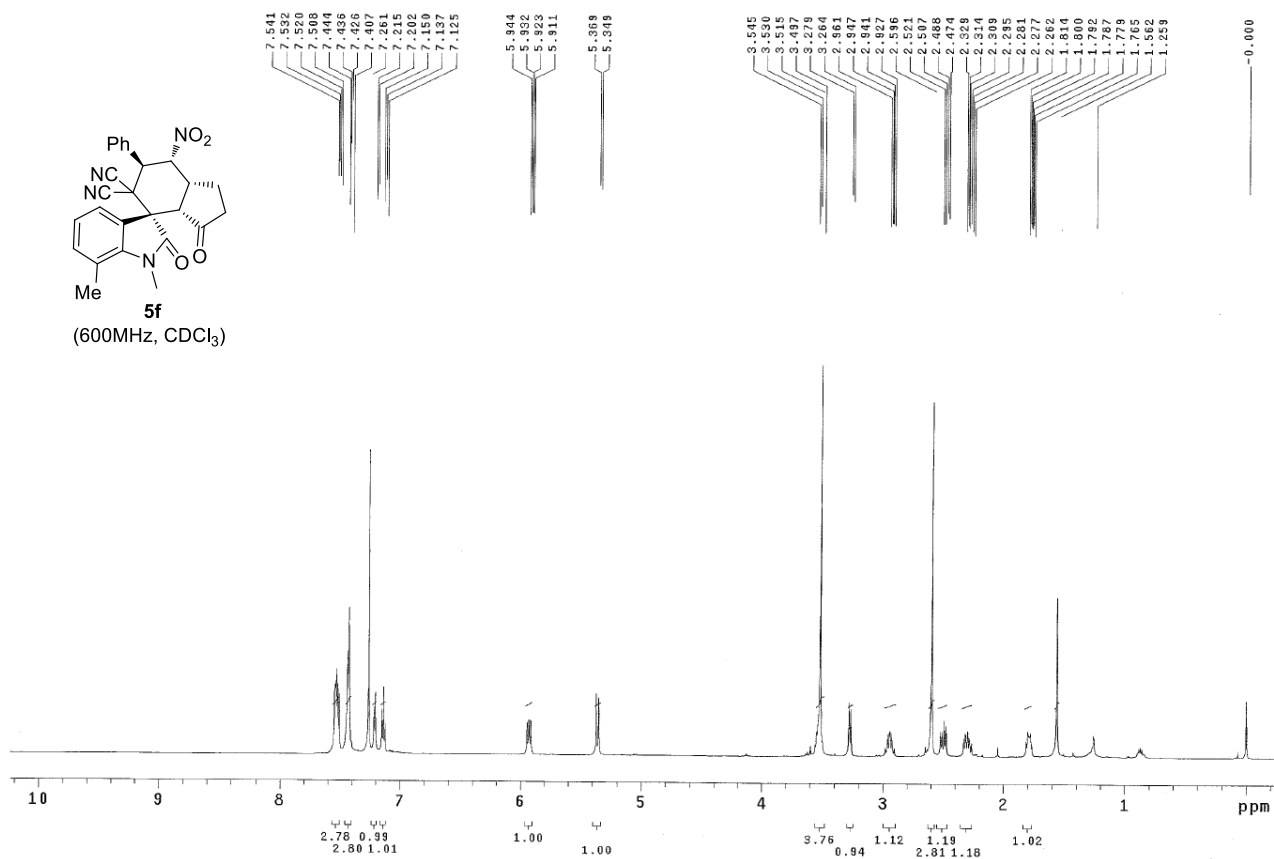

Pu<sup>13</sup>C Sequence: s2pu1

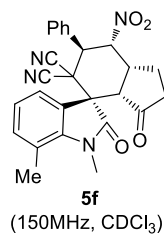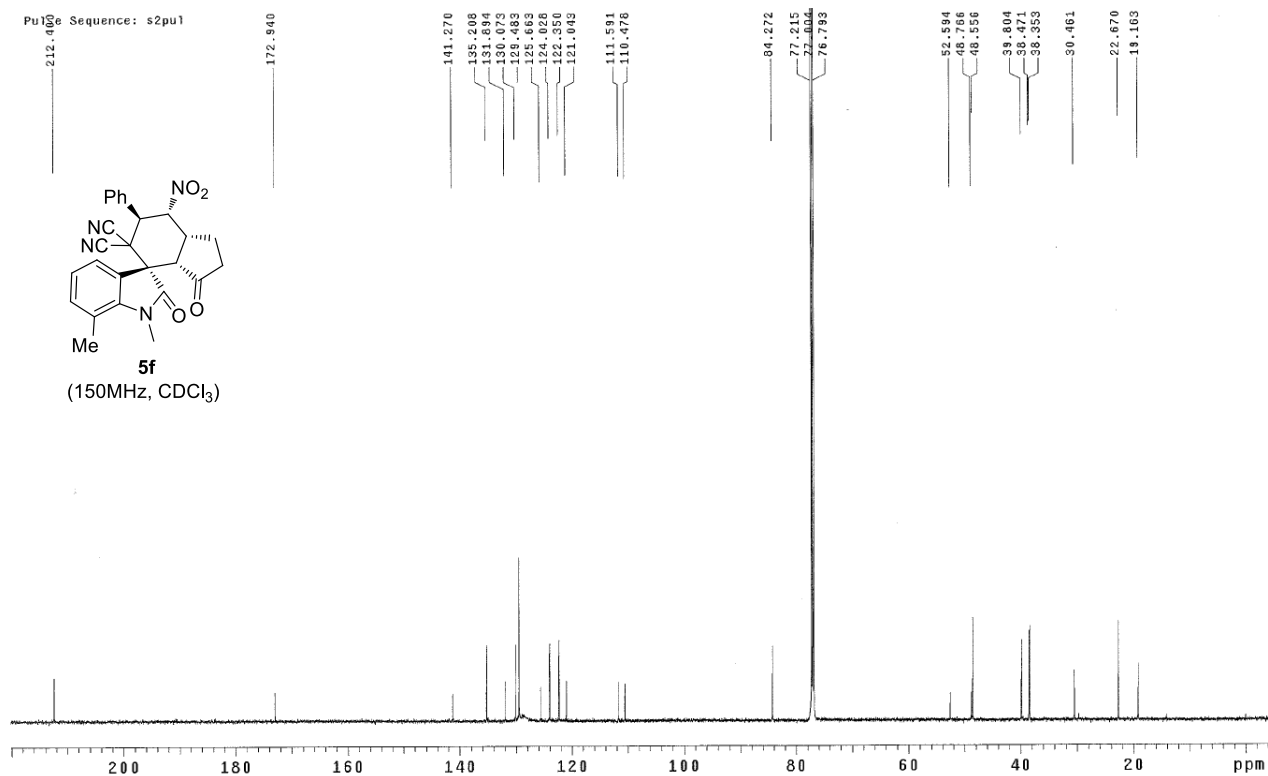

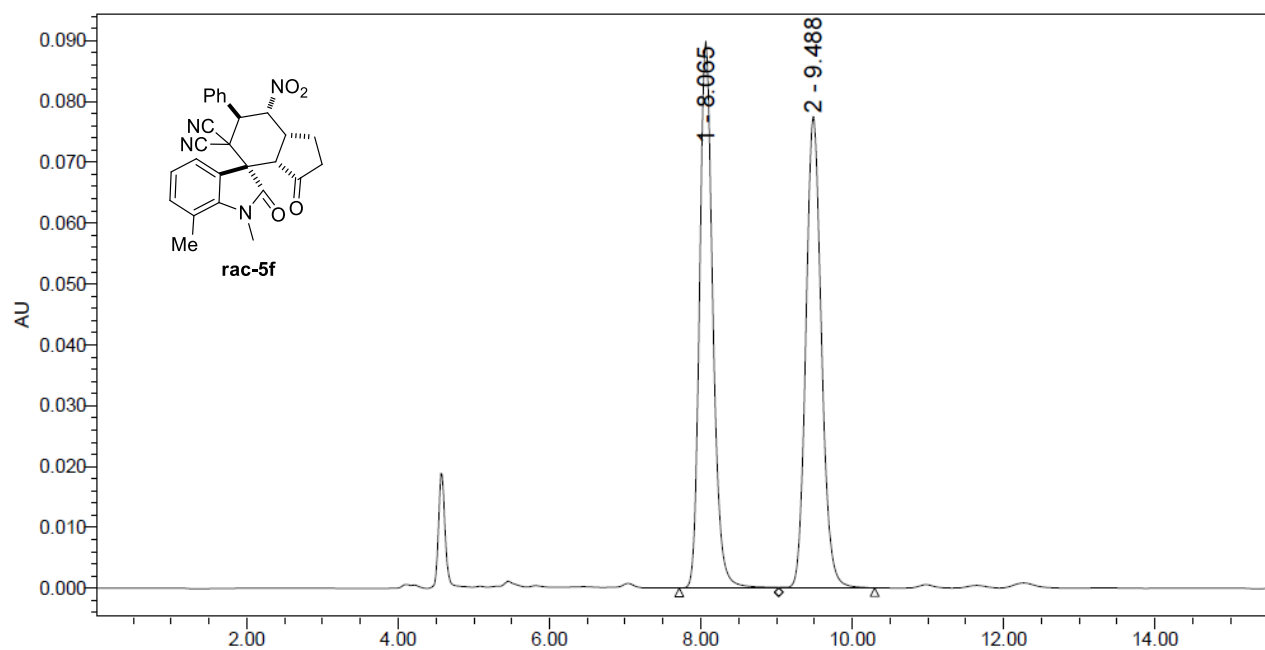

| Peak | RT (min) | Height | % Height | Area    | % Area |
|------|----------|--------|----------|---------|--------|
| 1    | 8.065    | 89818  | 53.68    | 1094525 | 49.69  |
| 2    | 9.488    | 77502  | 46.32    | 1108114 | 50.31  |

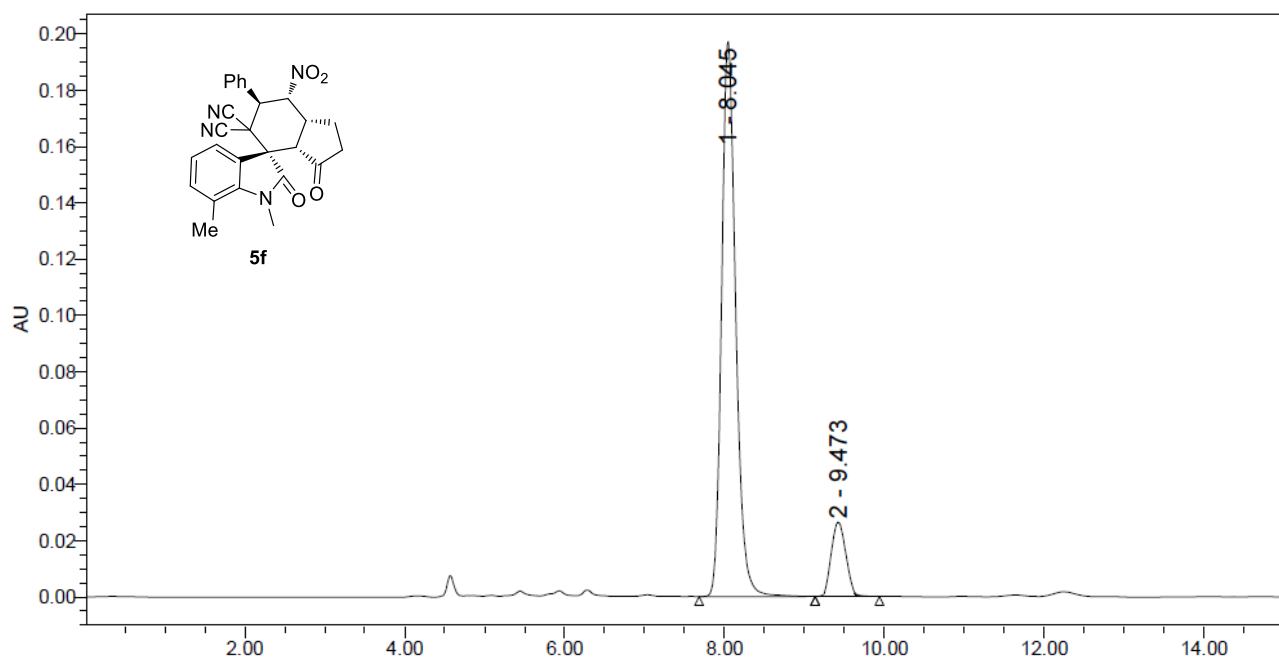

| Peak | RT (min) | Height | % Height | Area    | % Area |
|------|----------|--------|----------|---------|--------|
| 1    | 8.045    | 197523 | 86.94    | 2518839 | 92.02  |
| 2    | 9.473    | 29683  | 13.06    | 331093  | 7.98   |



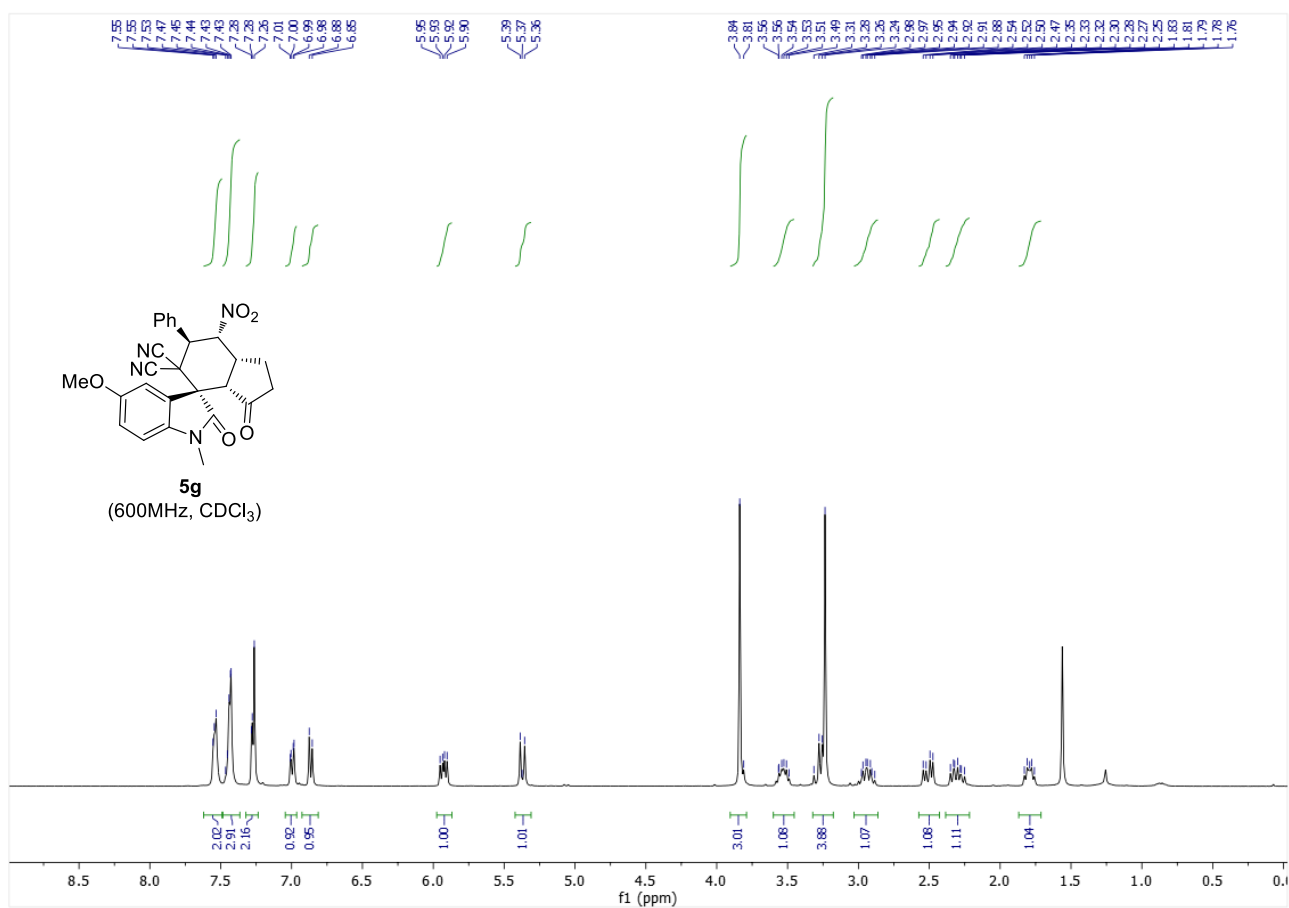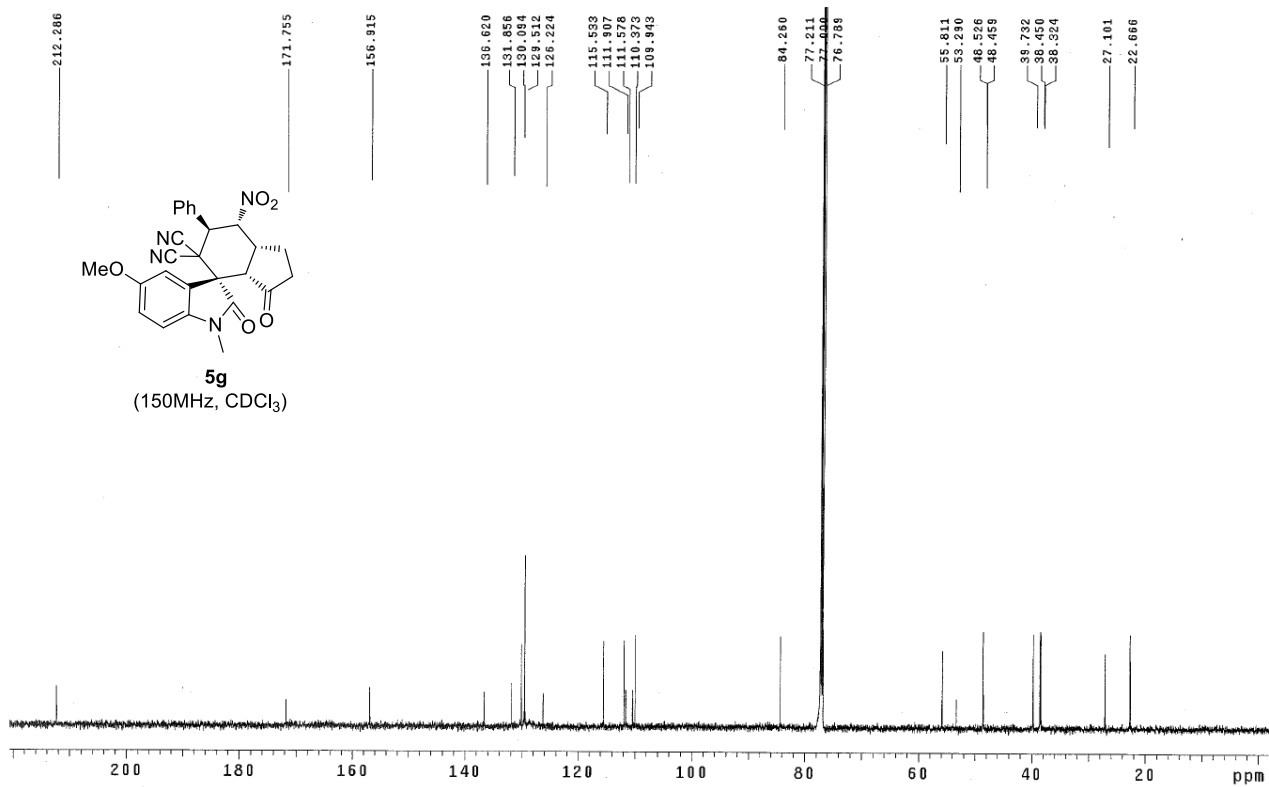

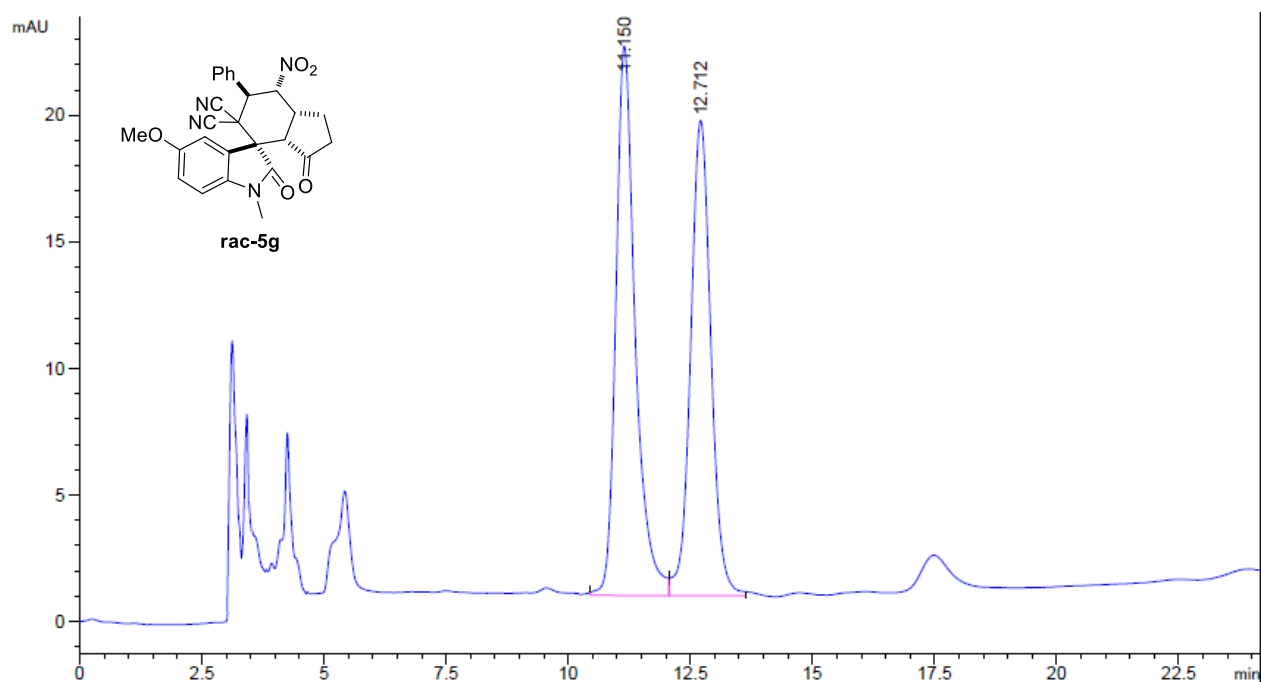

| Peak | RT (min) | Height | % Height | Area   | % Area |
|------|----------|--------|----------|--------|--------|
| 1    | 11.150   | 21.68  | 58.84    | 600.22 | 52.55  |
| 2    | 12.712   | 18.77  | 41.16    | 541.93 | 47.45  |

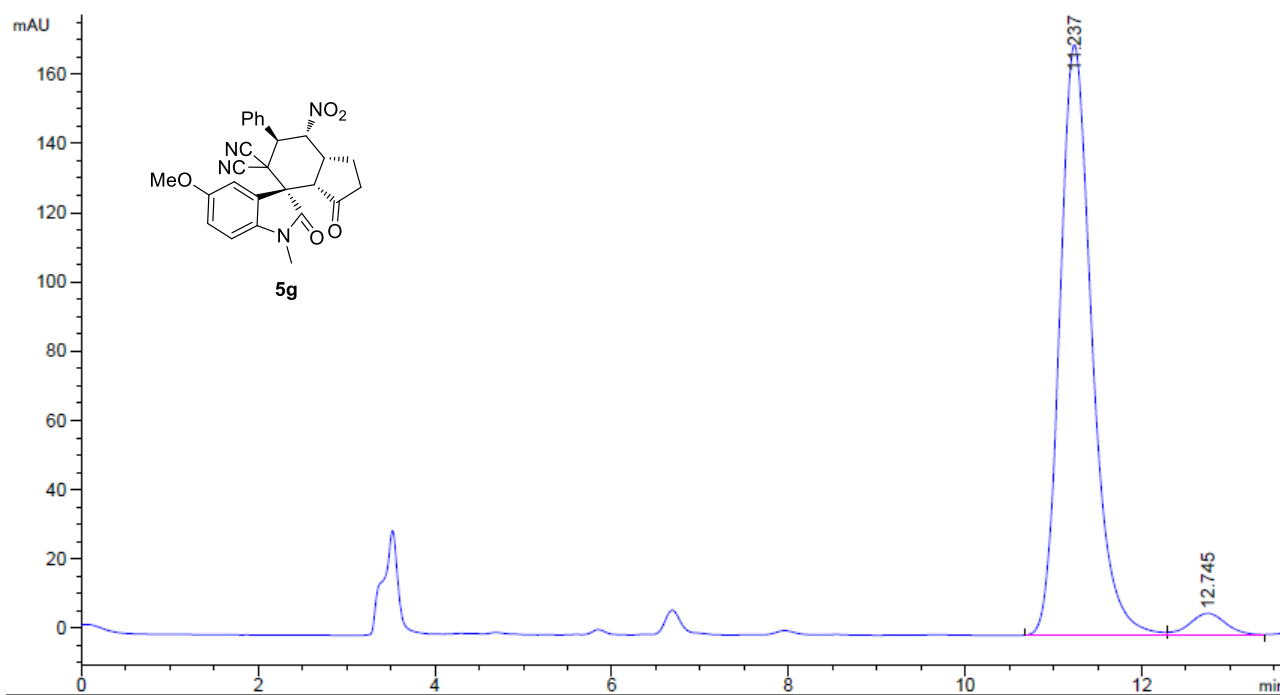

| Peak | RT (min) | Height | % Height | Area   | % Area |
|------|----------|--------|----------|--------|--------|
| 1    | 11.237   | 170.34 | 96.55    | 4303.2 | 95.97  |
| 2    | 12.745   | 6.30   | 3.45     | 180.6  | 4.03   |

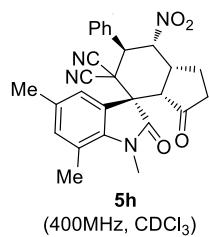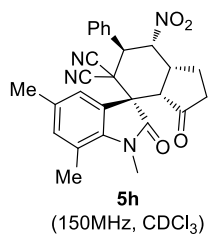

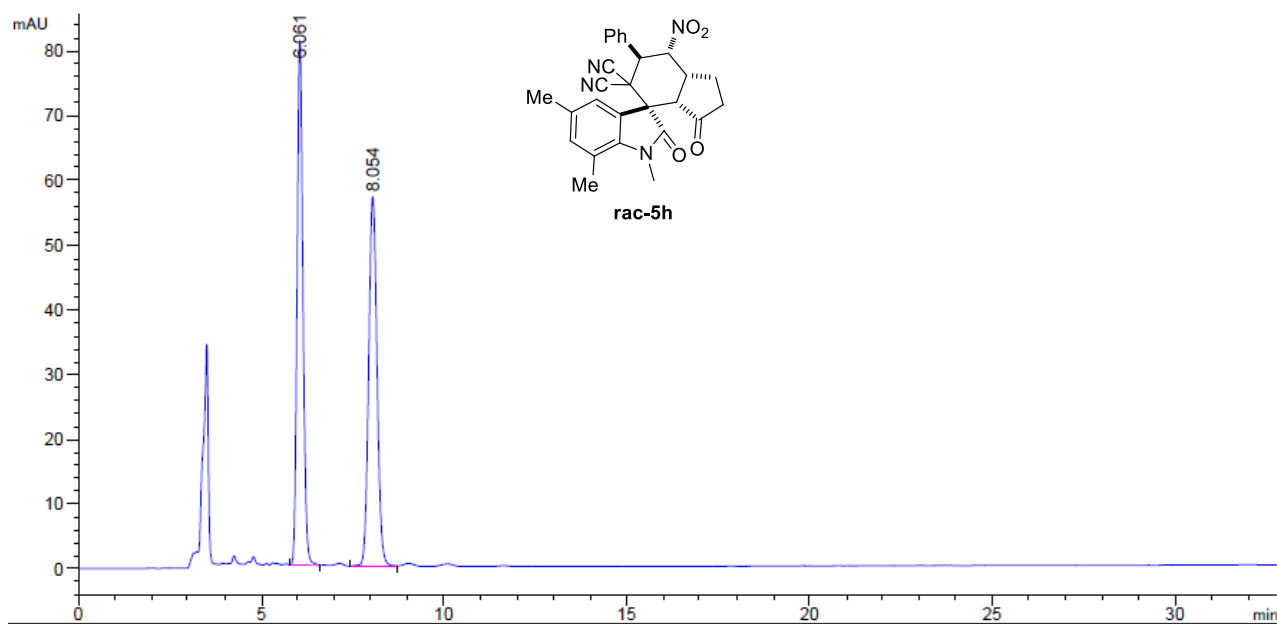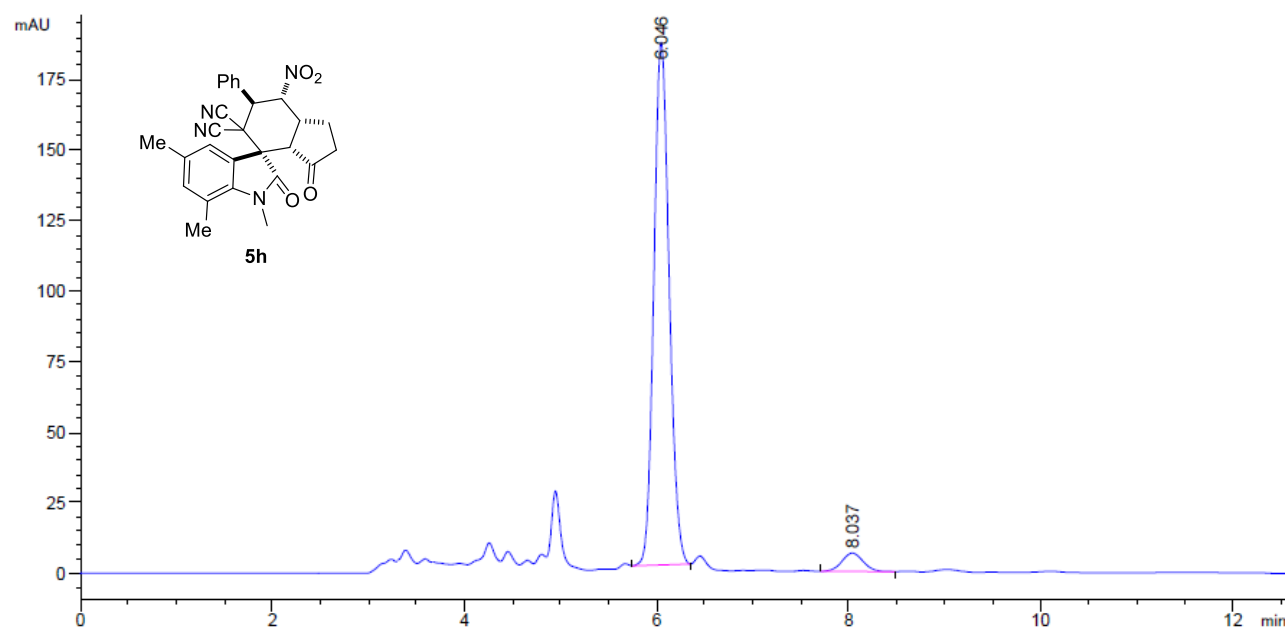

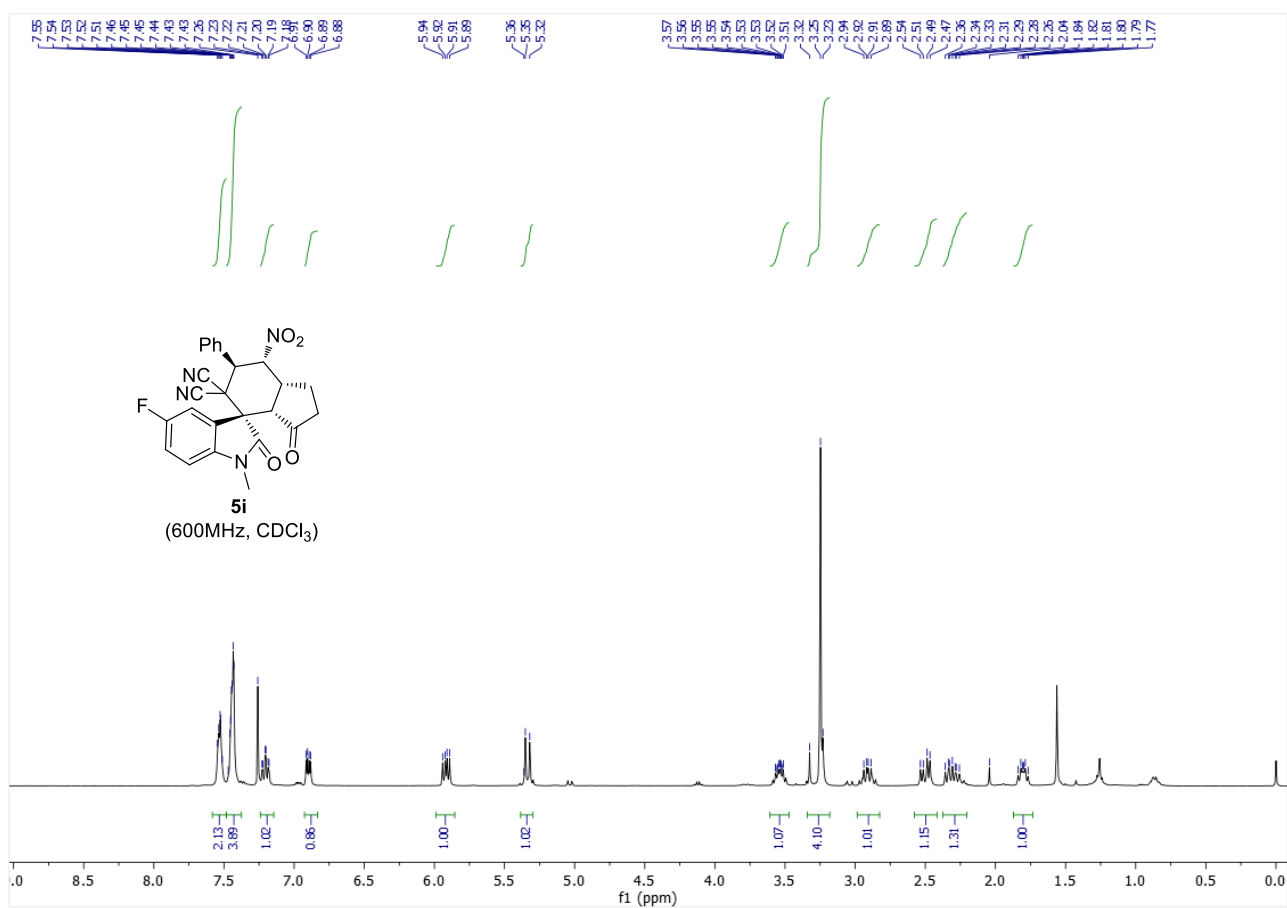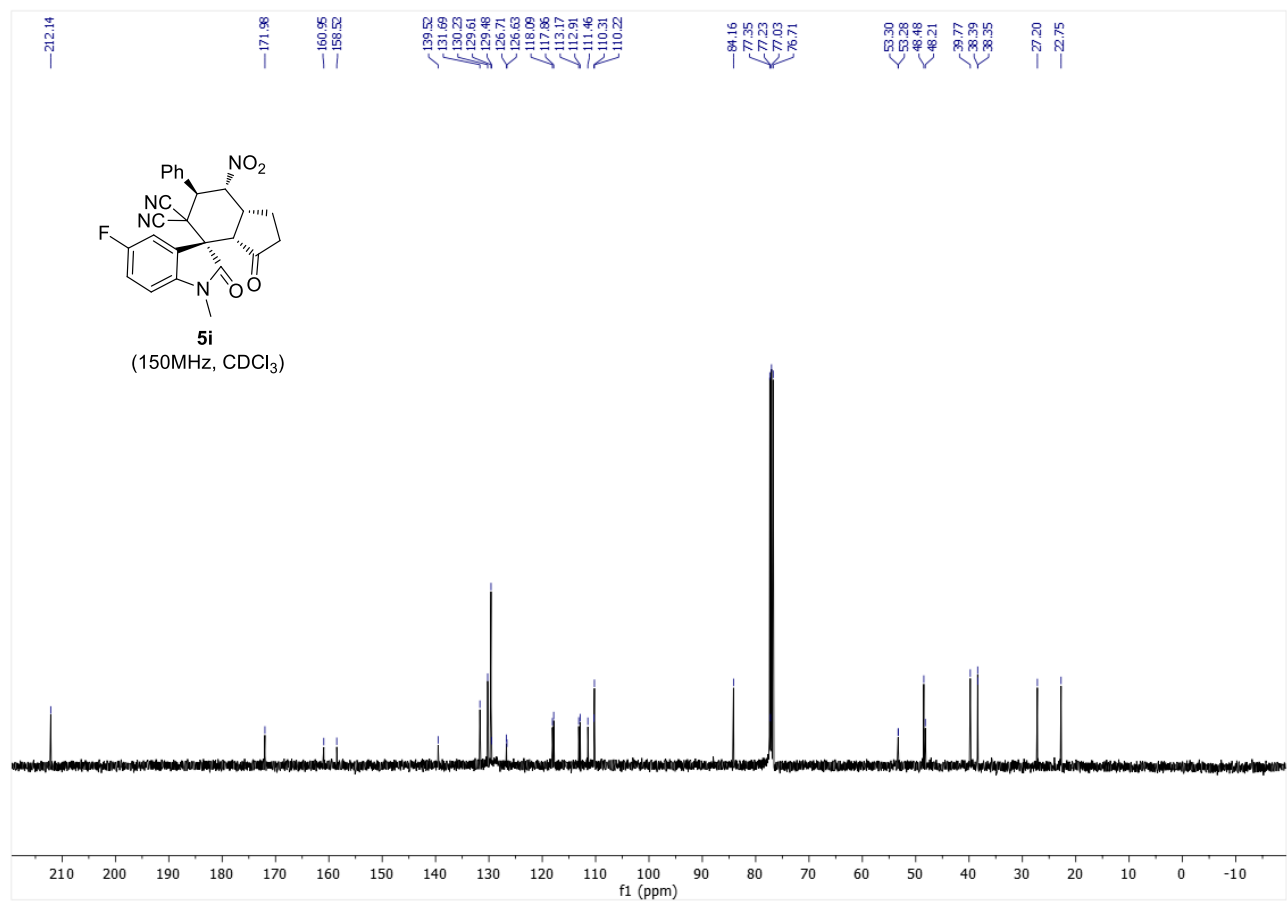

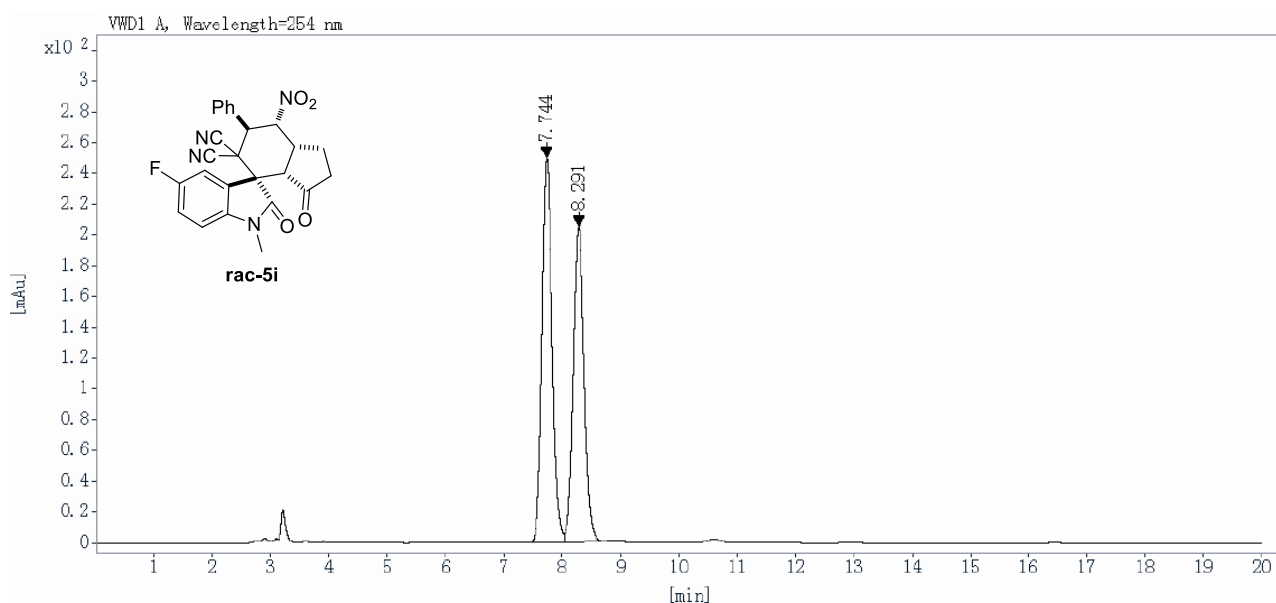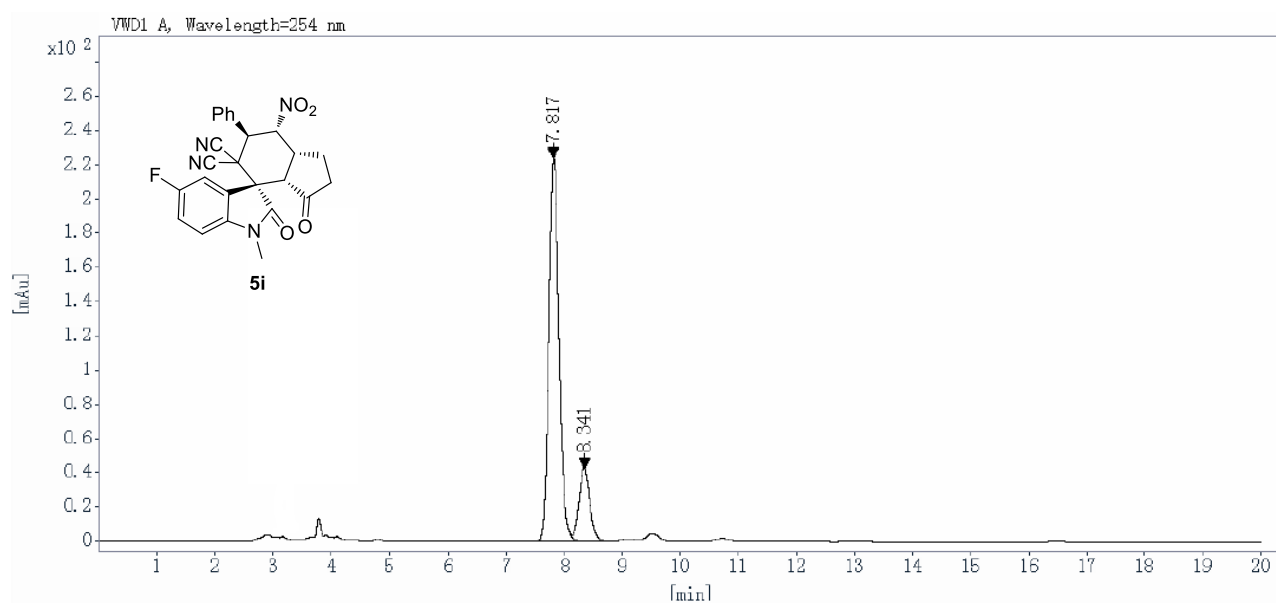

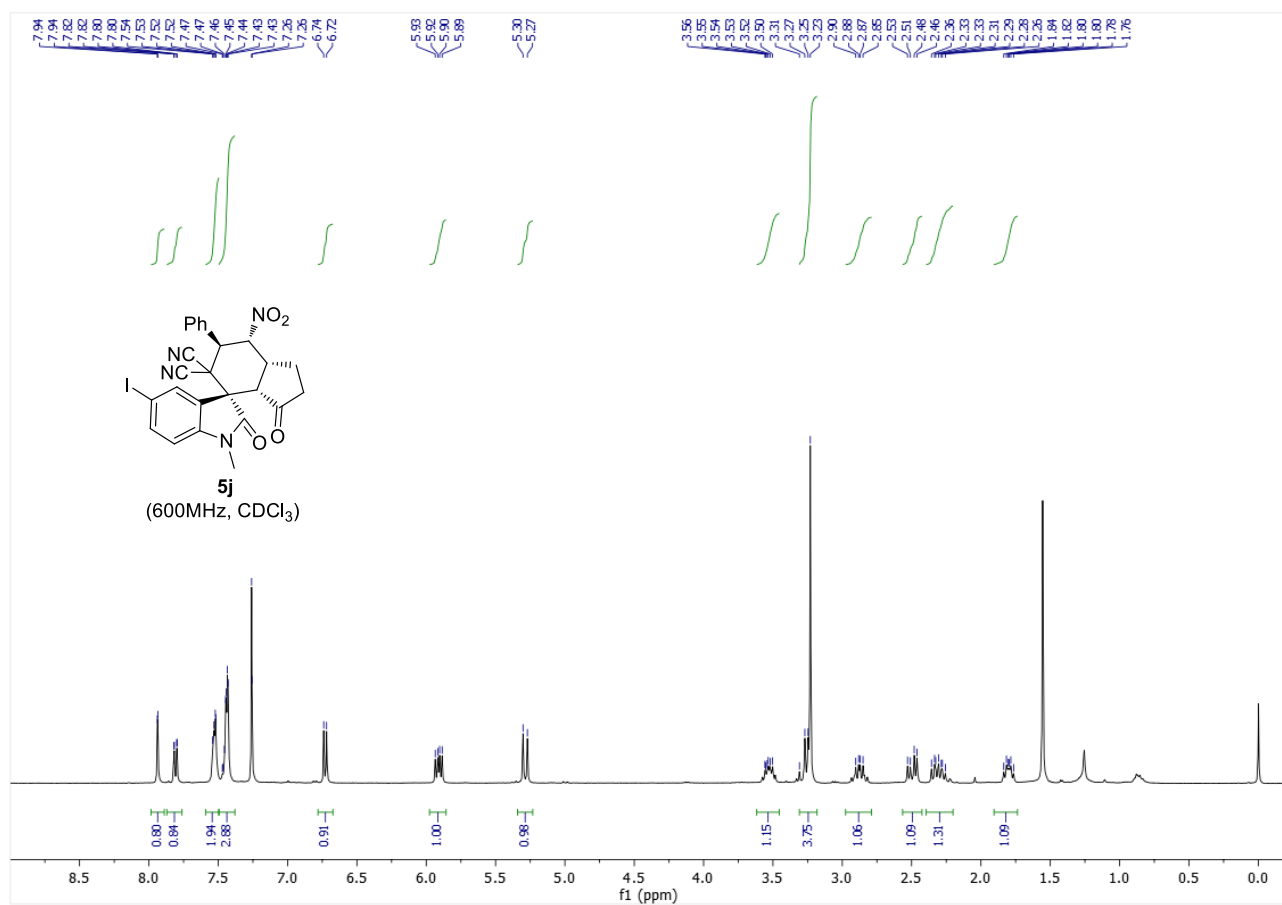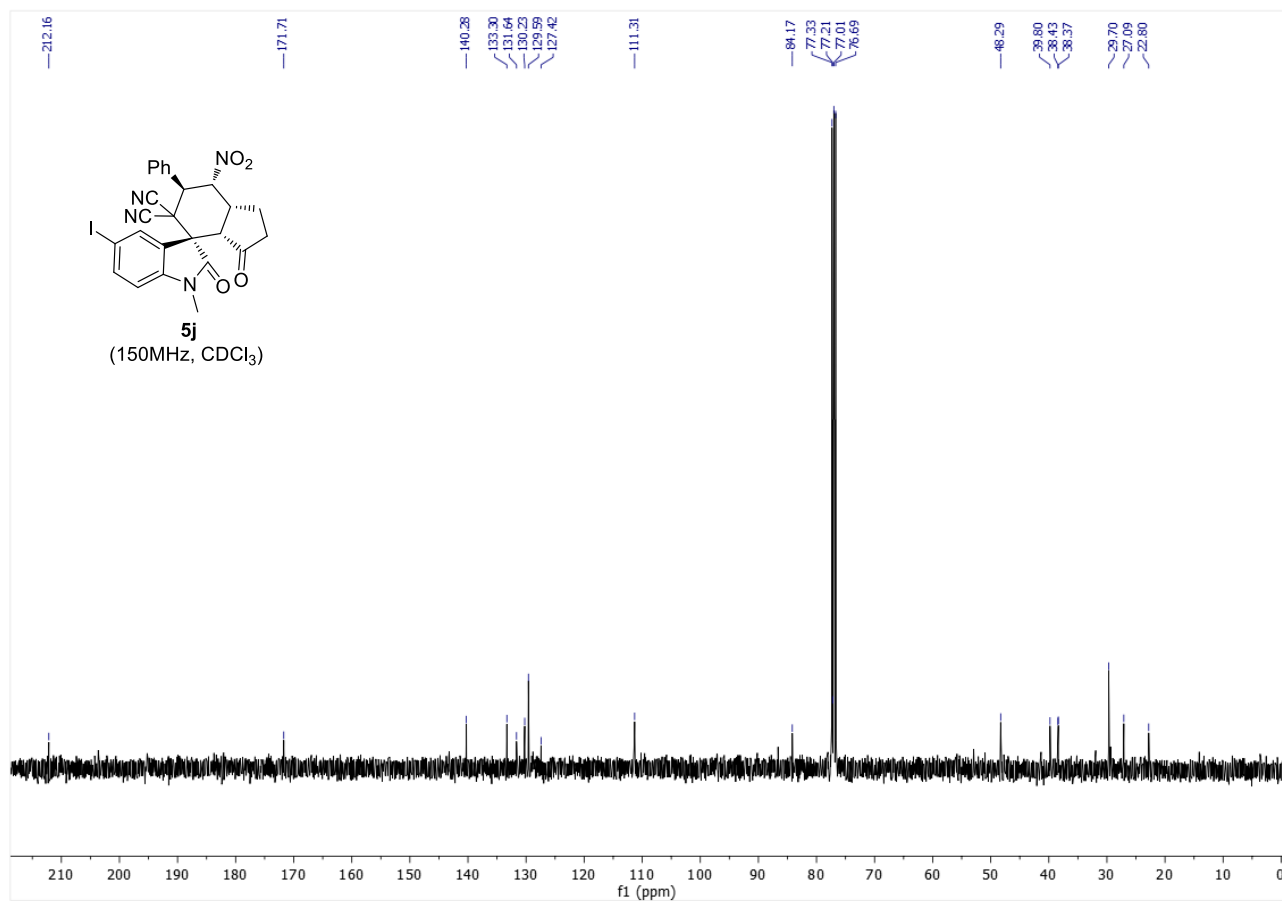

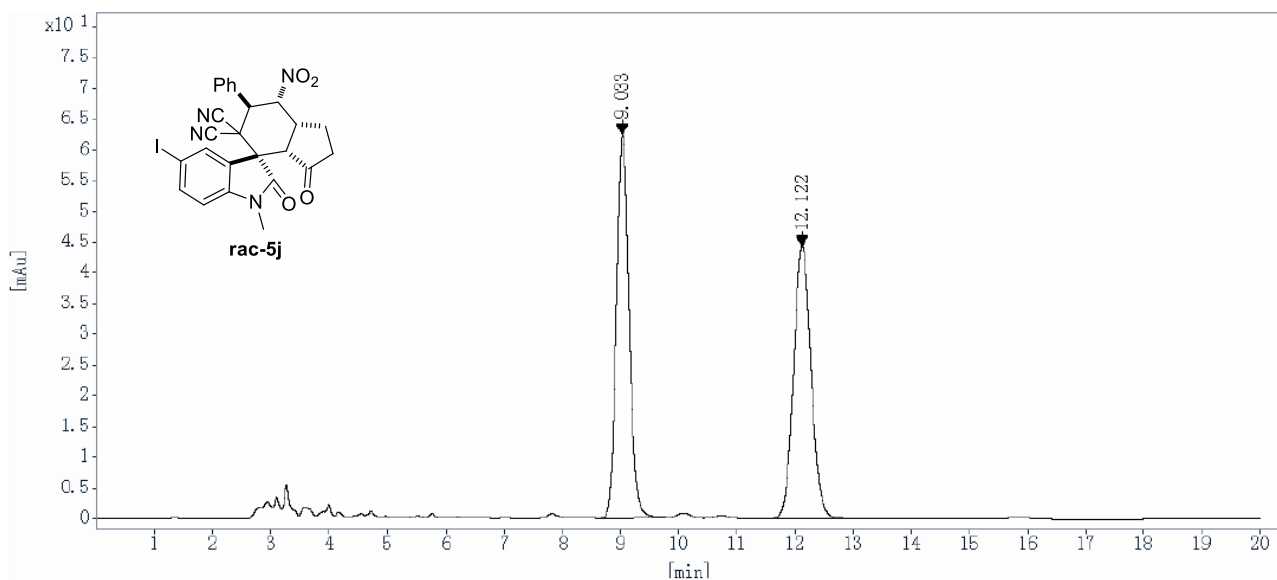

| Ret Time [min] | Peak Type | Width [min] | Height [mAU] | Area [mAU*s] | Area [%] |
|----------------|-----------|-------------|--------------|--------------|----------|
| 9.033          | BB        | 0.23        | 62.2731      | 936.2390     | 50.2052  |
| 12.122         | BB        | 0.33        | 44.3350      | 928.5851     | 49.7948  |

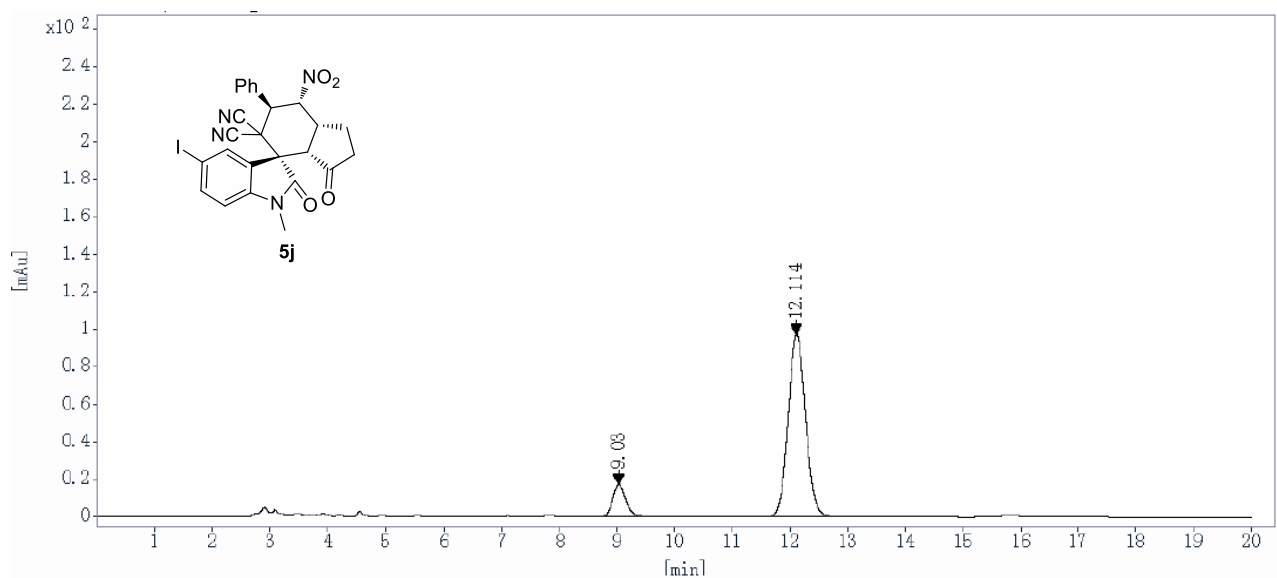

| Ret Time [min] | Peak Type | Width [min] | Height [mAU] | Area [mAU*s] | Area [%] |
|----------------|-----------|-------------|--------------|--------------|----------|
| 9.030          | BBA       | 0.24        | 17.1948      | 273.0152     | 11.7910  |
| 12.114         | BB        | 0.33        | 97.0805      | 2042.4358    | 88.2090  |



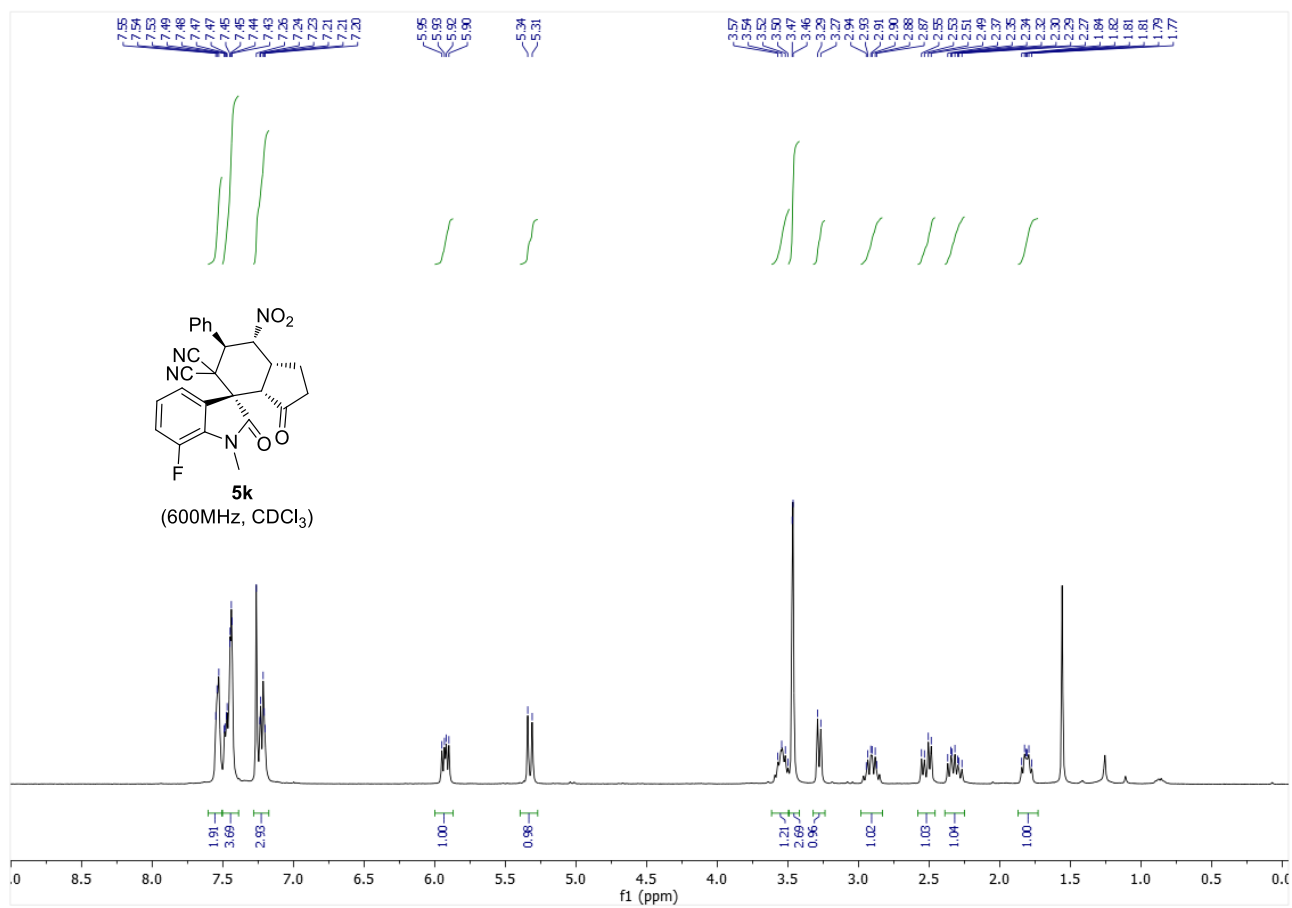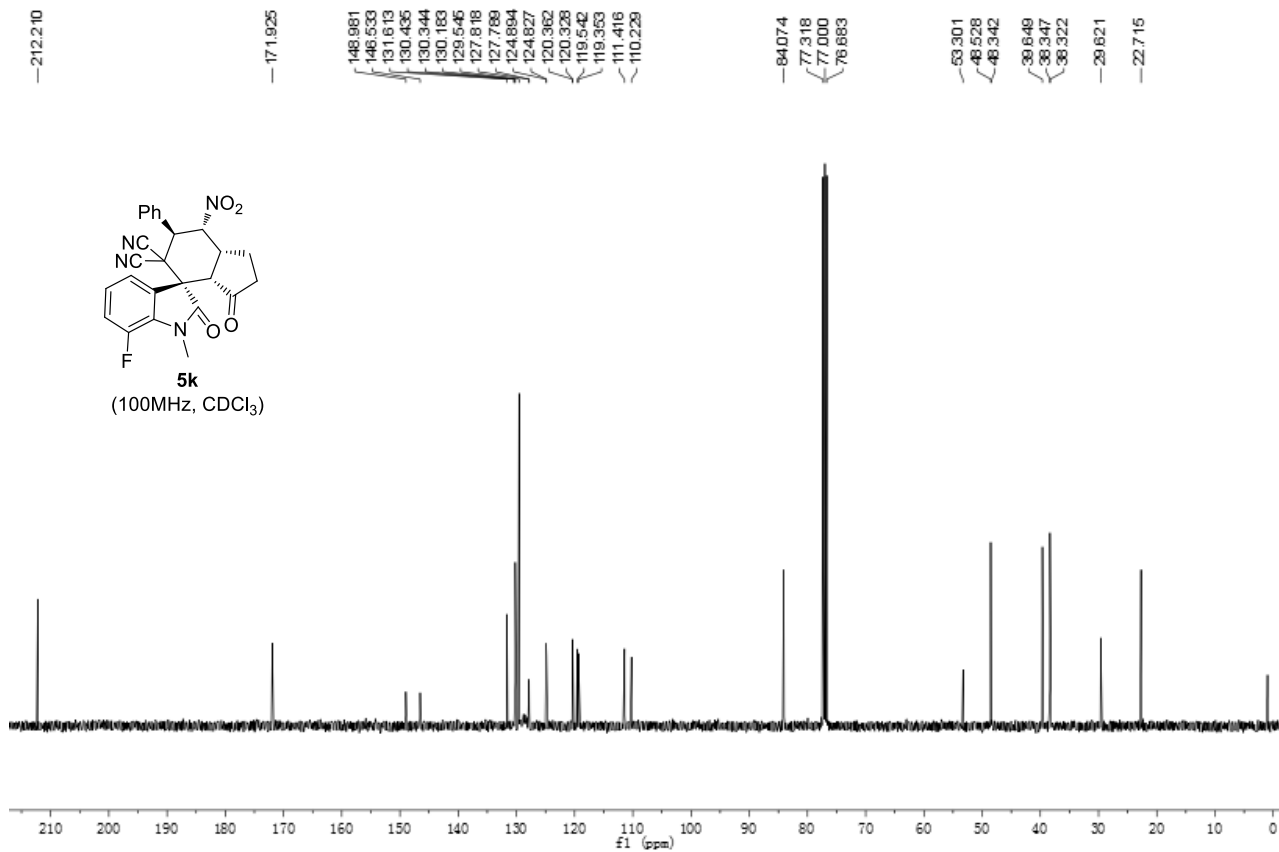

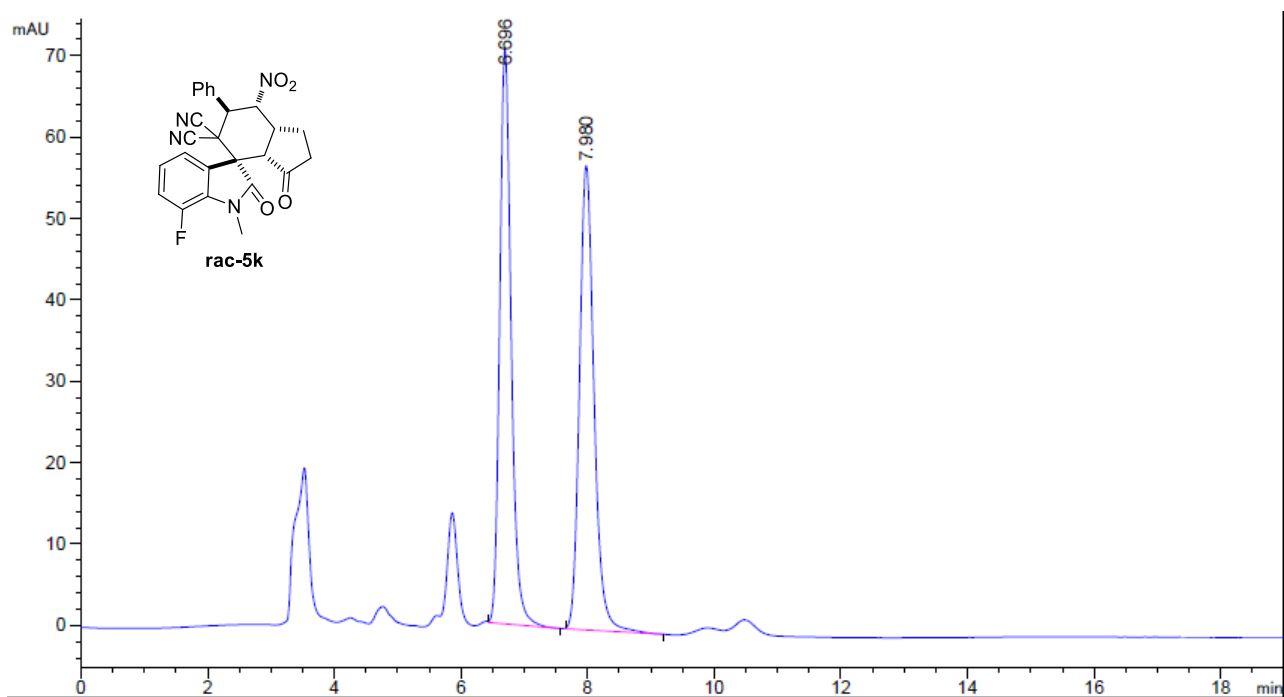

| # | [min] |    | [min]  | mAU       | *s | [mAU]    | %       |
|---|-------|----|--------|-----------|----|----------|---------|
| 1 | 6.696 | BB | 0.1937 | 888.07391 |    | 70.40771 | 49.4315 |
| 2 | 7.980 | BB | 0.2443 | 908.49933 |    | 56.95322 | 50.5685 |

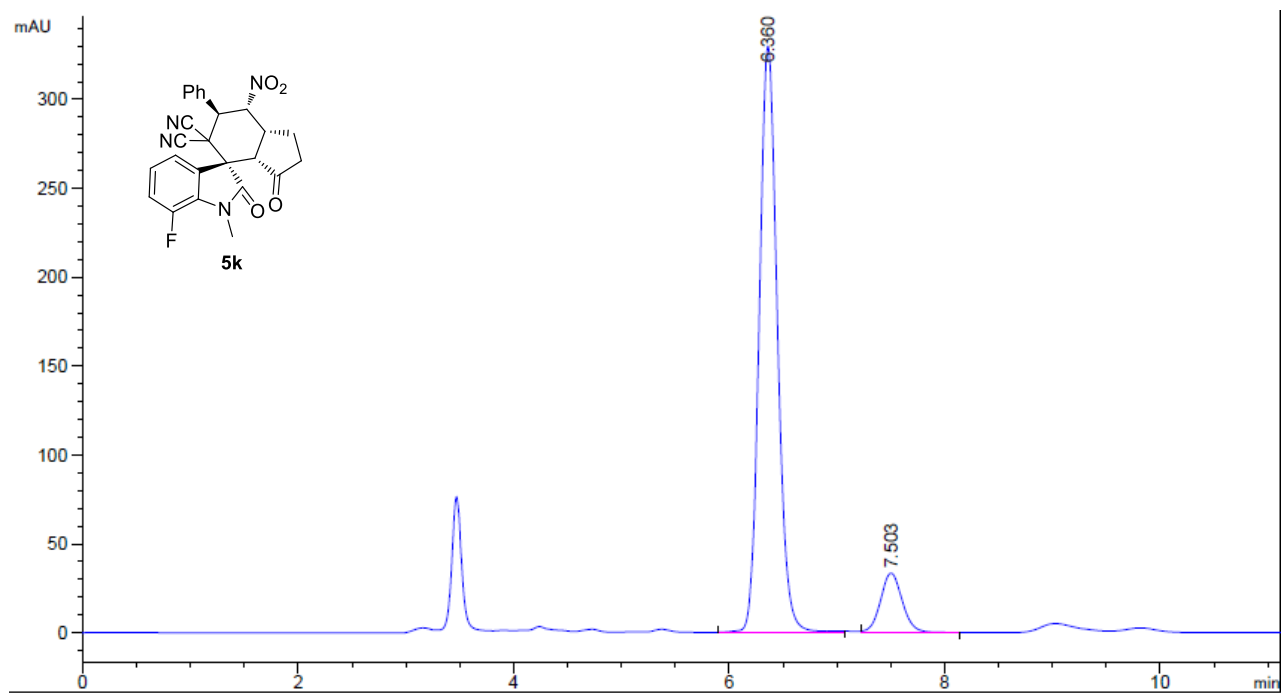

| # | [min] |    | [min]  | mAU        | *s | [mAU]     | %       |
|---|-------|----|--------|------------|----|-----------|---------|
| 1 | 6.360 | BB | 0.1828 | 3841.84229 |    | 328.96249 | 89.1134 |
| 2 | 7.503 | BB | 0.2167 | 469.34079  |    | 33.33318  | 10.8866 |



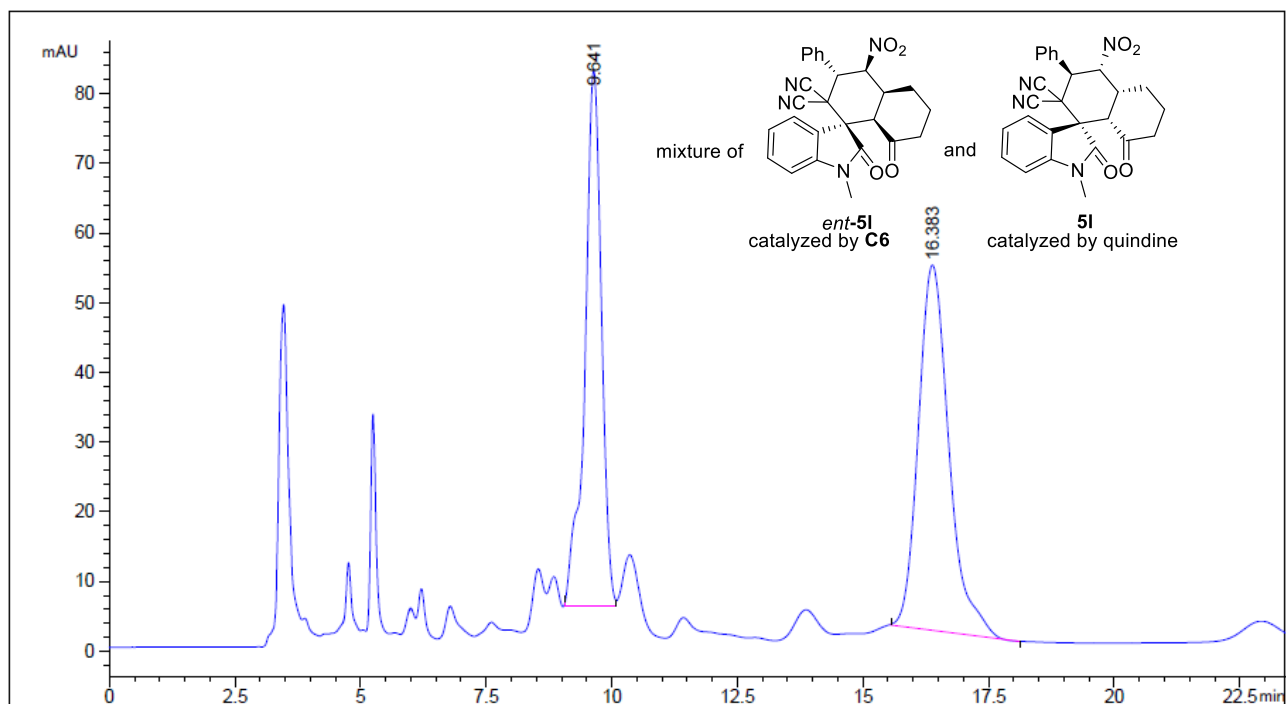

| Peak # | RetTime [min] | Type | Width [min] | Area mAU *s | Height [mAU] | Area %  |
|--------|---------------|------|-------------|-------------|--------------|---------|
| 1      | 9.641         | BV   | 0.3496      | 1767.90662  | 76.94705     | 44.3741 |
| 2      | 16.383        | BB   | 0.6505      | 2216.18555  | 52.41575     | 55.6259 |

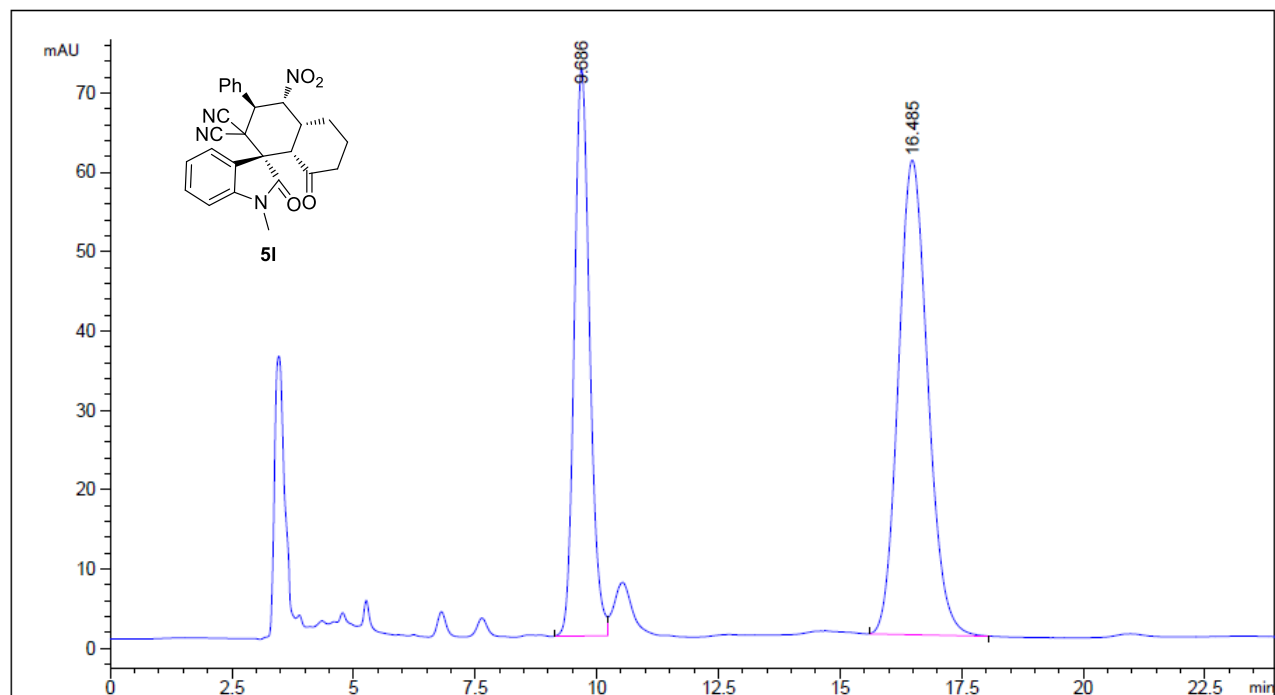

| Peak # | RetTime [min] | Type | Width [min] | Area mAU *s | Height [mAU] | Area %  |
|--------|---------------|------|-------------|-------------|--------------|---------|
| 1      | 9.686         | BV   | 0.3385      | 1572.94592  | 71.42467     | 31.5121 |
| 2      | 16.485        | BB   | 0.6530      | 2511.34131  | 59.79663     | 68.4879 |

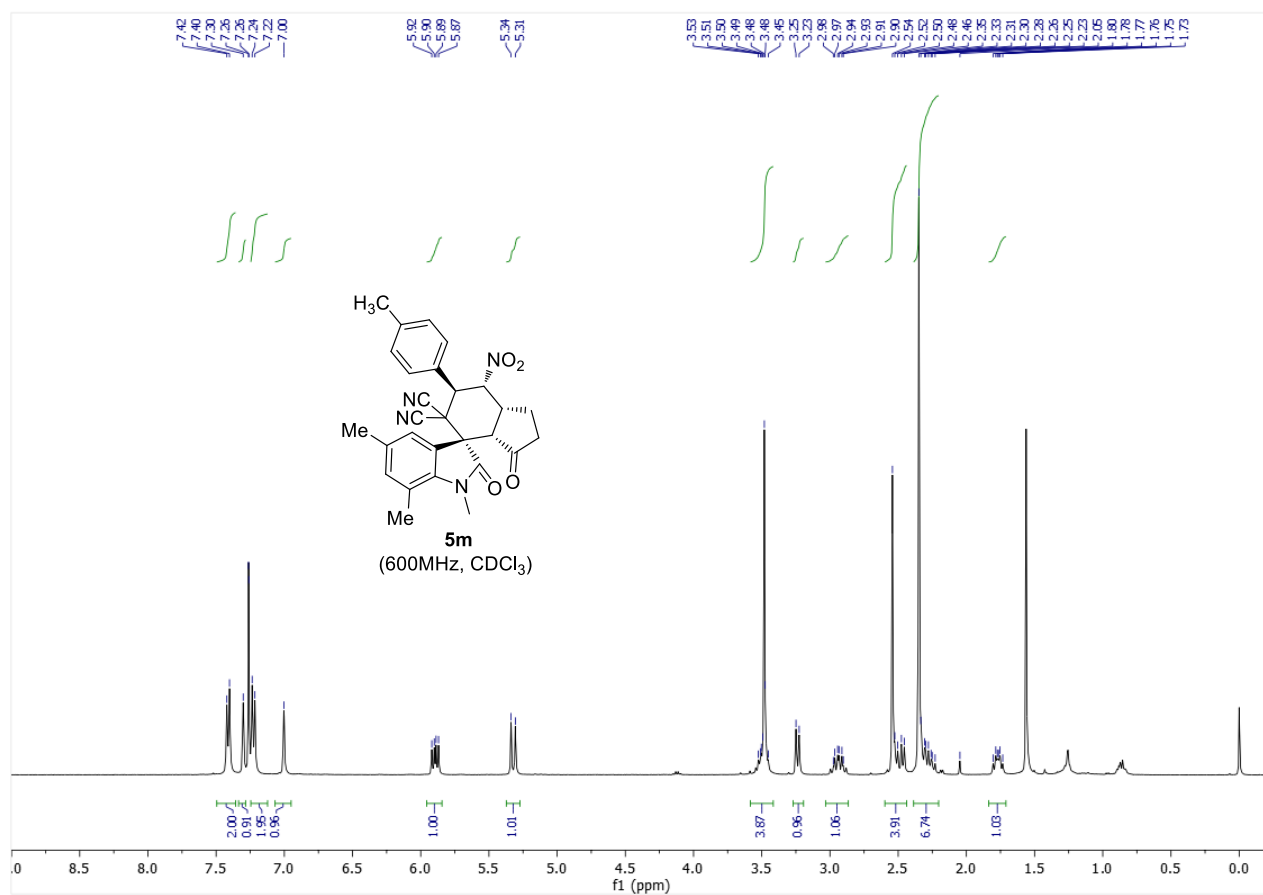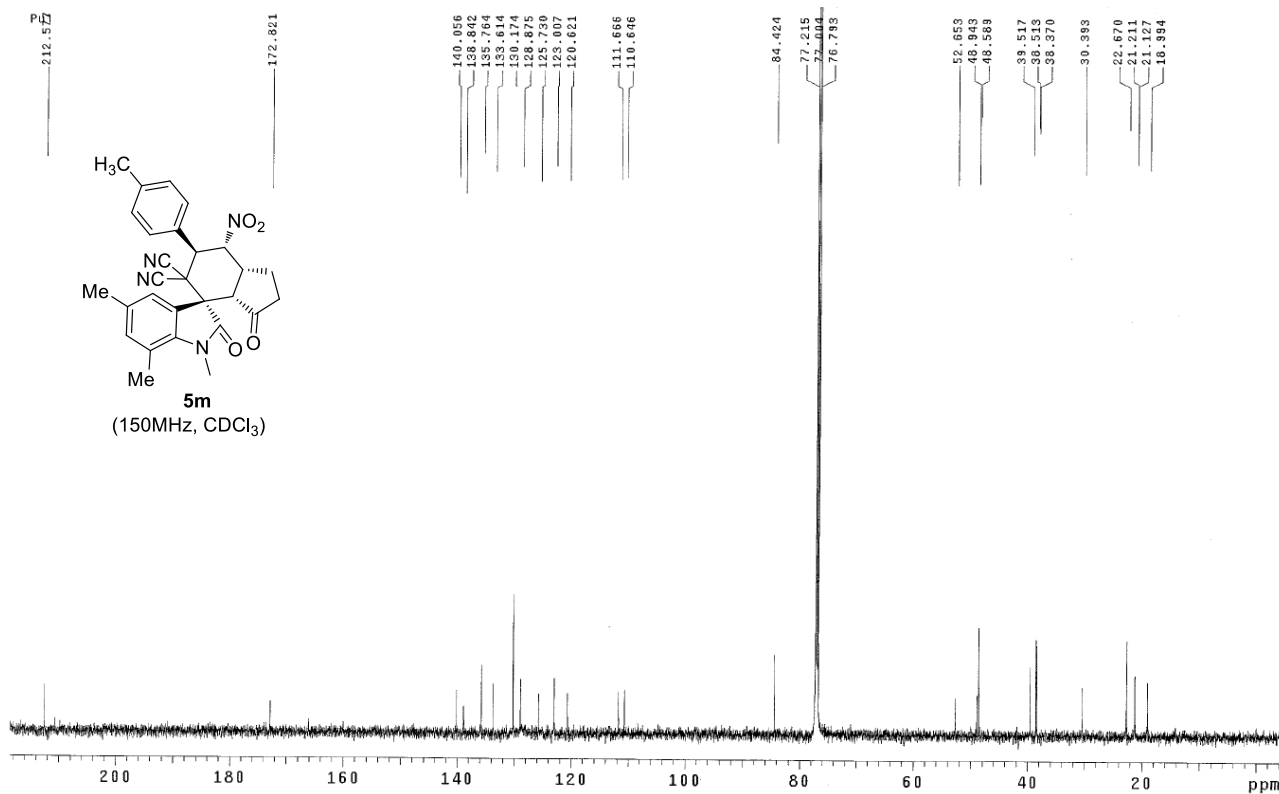

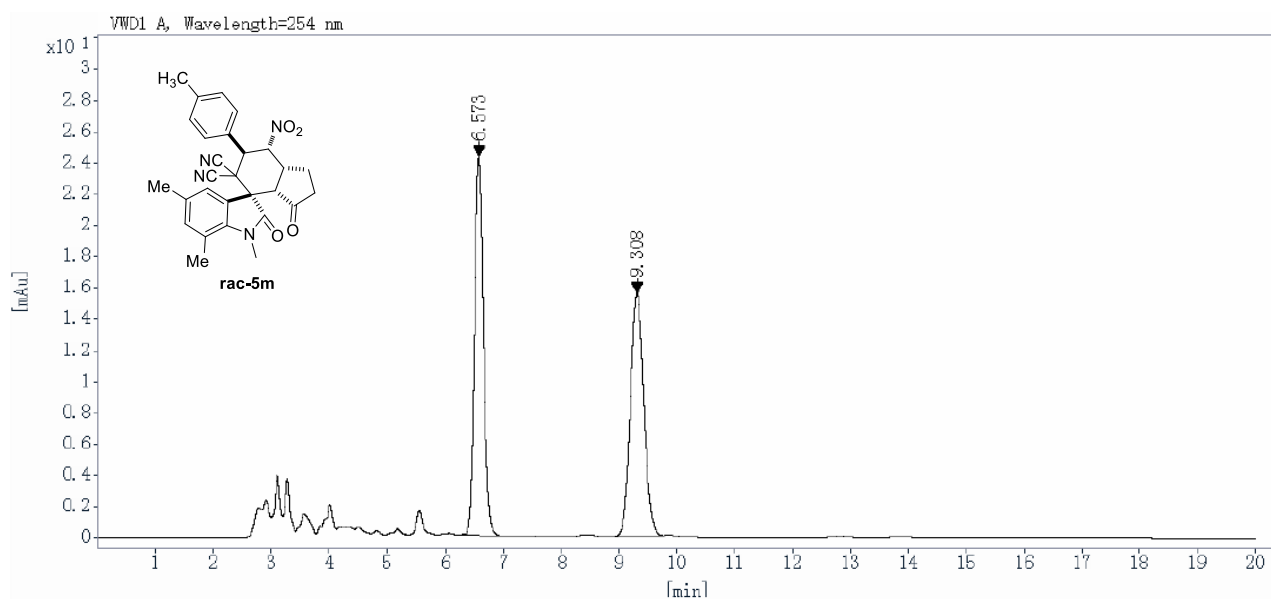

| Ret Time [min] | Peak Type | Width [min] | Height [mAU] | Area [mAU*s] | Area [%] |
|----------------|-----------|-------------|--------------|--------------|----------|
| 6.573          | BB        | 0.16        | 24.2341      | 255.2037     | 50.1757  |
| 9.308          | BB        | 0.25        | 15.5648      | 253.4164     | 49.8243  |

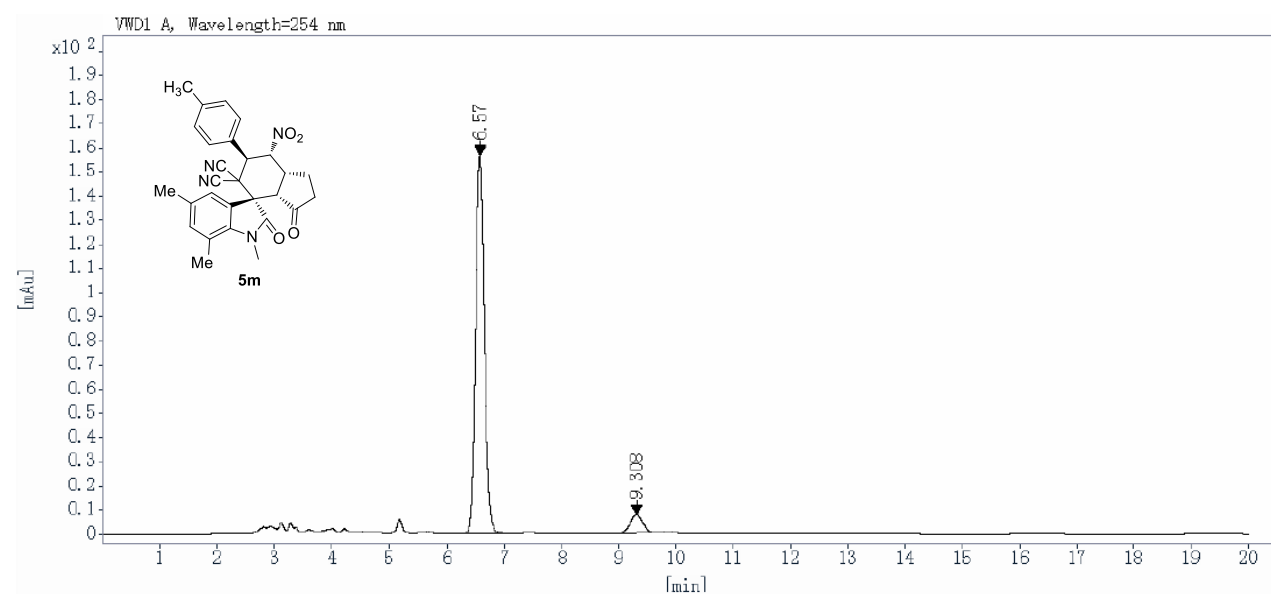

| Ret Time [min] | Peak Type | Width [min] | Height [mAU] | Area [mAU*s] | Area [%] |
|----------------|-----------|-------------|--------------|--------------|----------|
| 6.570          | BB        | 0.16        | 156.4582     | 1636.0673    | 93.1627  |
| 9.308          | BB        | 0.25        | 7.6018       | 120.0720     | 6.8373   |

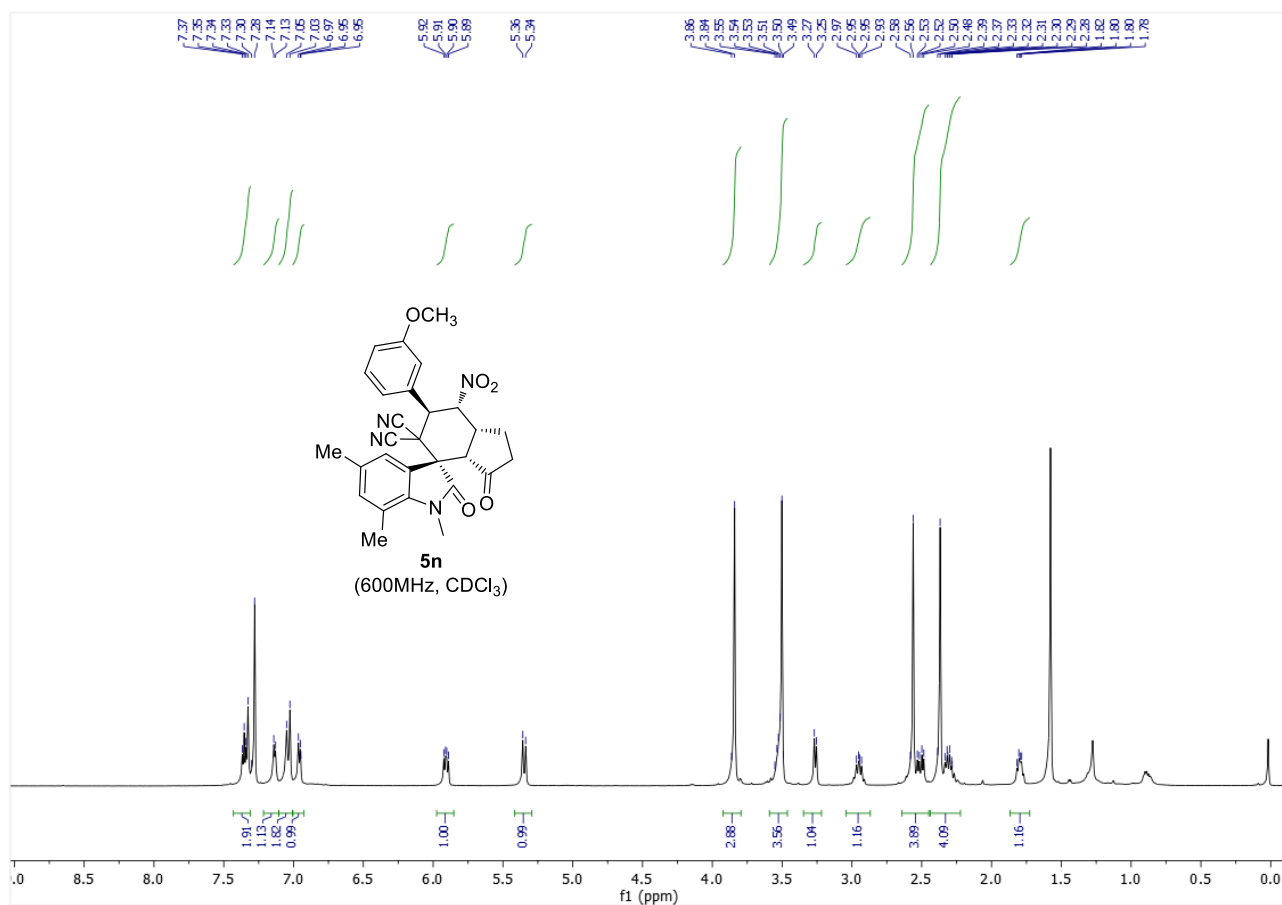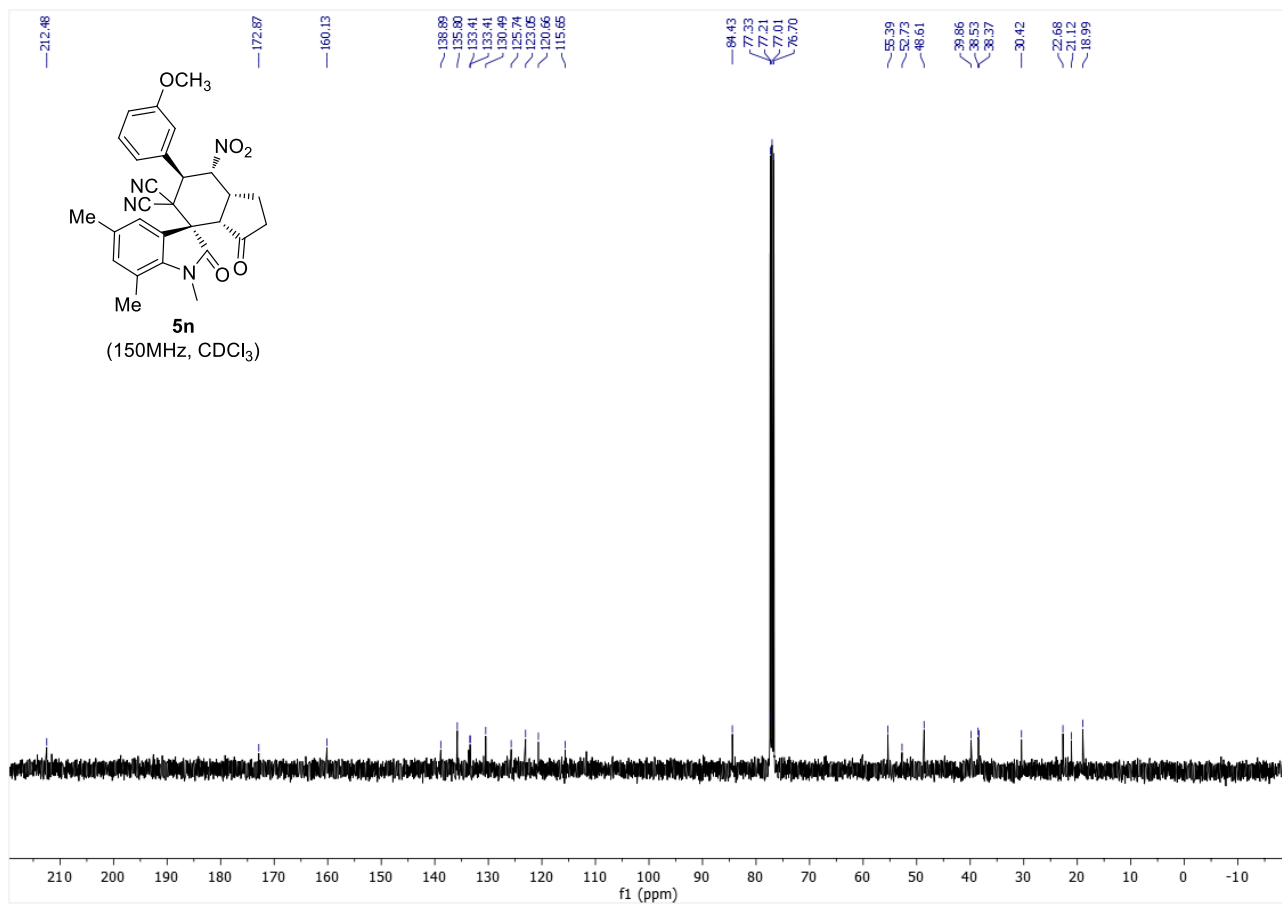

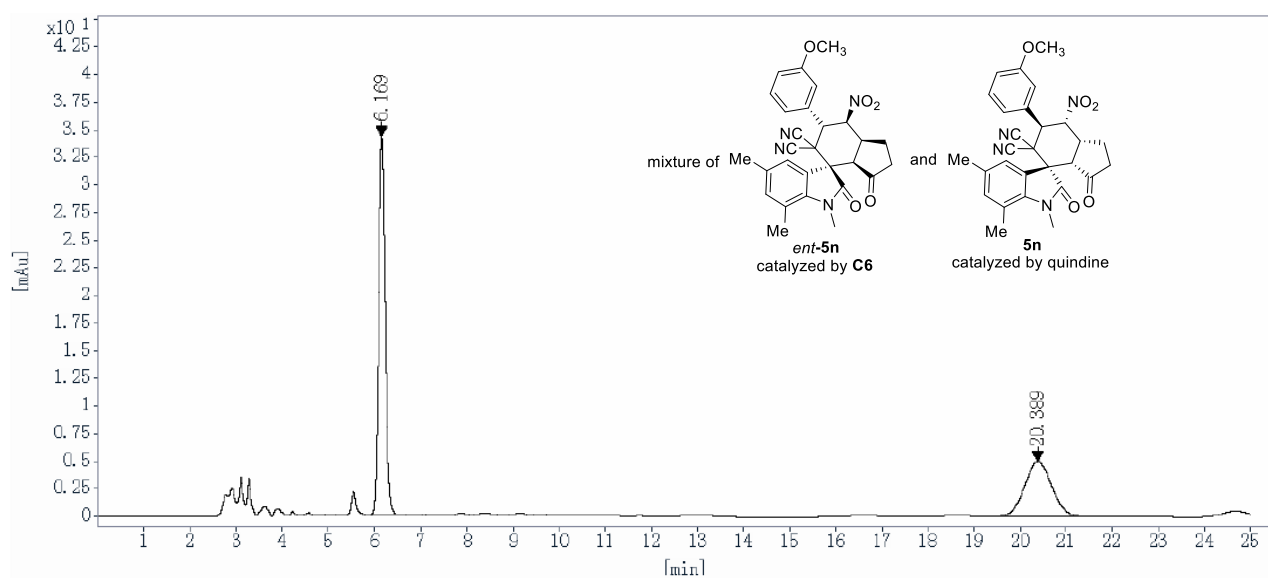

| Ret Time [min] | Peak Type | Width [min] | Height [mAU] | Area [mAU*s] | Area [%] |
|----------------|-----------|-------------|--------------|--------------|----------|
| 6.169          | BB        | 0.15        | 34.2513      | 333.1806     | 62.2233  |
| 20.389         | BB        | 0.62        | 4.9460       | 202.2790     | 37.7767  |

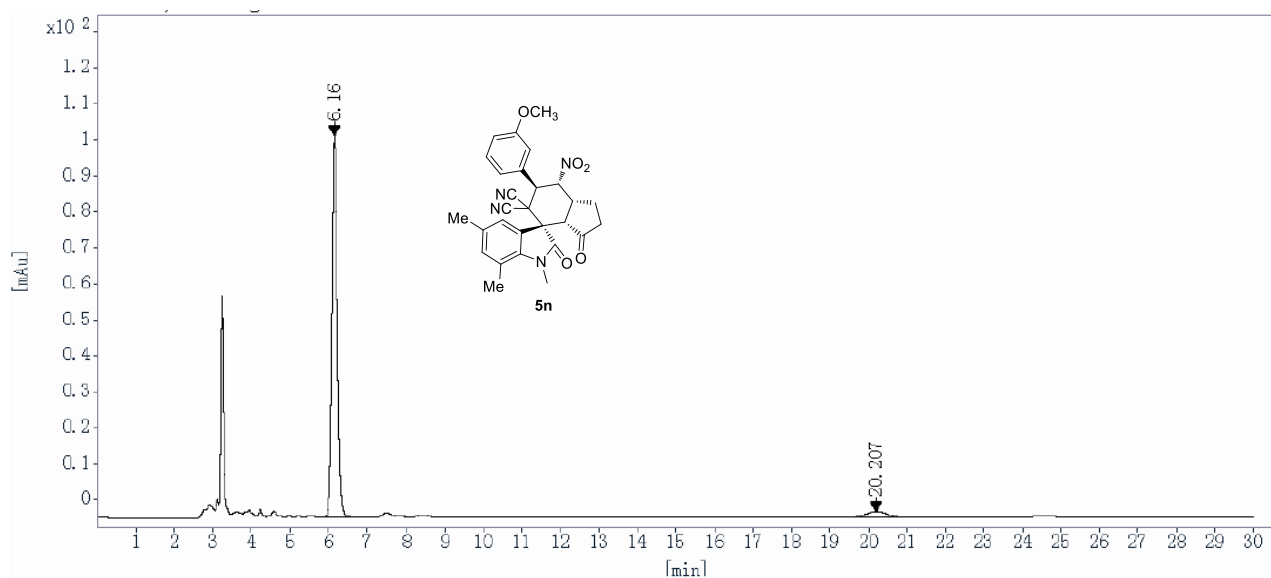

| Ret Time [min] | Peak Type | Width [min] | Height [mAU] | Area [mAU*s] | Area [%] |
|----------------|-----------|-------------|--------------|--------------|----------|
| 6.160          | BB        | 0.15        | 105.7407     | 1029.4650    | 94.0840  |
| 20.207         | BB        | 0.58        | 1.6240       | 64.7330      | 5.9160   |





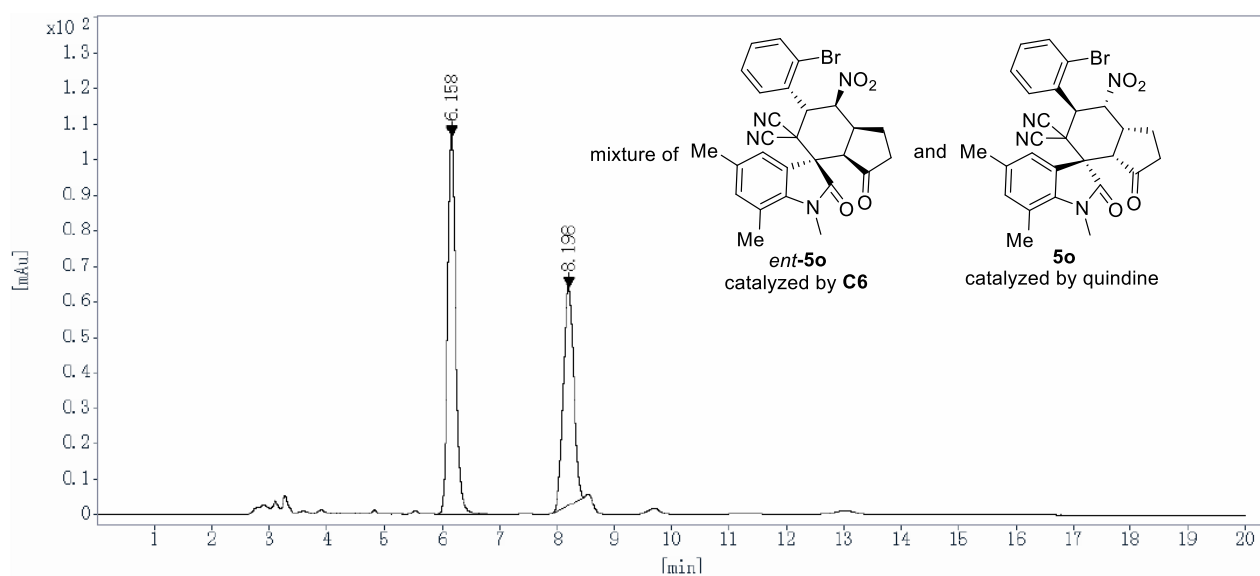

| Ret Time<br>[min] | Peak<br>Type | Width<br>[min] | Height<br>[mAU] | Area<br>[mAU*s] | Area<br>[%] |
|-------------------|--------------|----------------|-----------------|-----------------|-------------|
| 6.158             | VB           | 0.15           | 106.4596        | 1023.8345       | 56.8231     |
| 8.198             | BB           | 0.20           | 61.4051         | 777.9598        | 43.1769     |

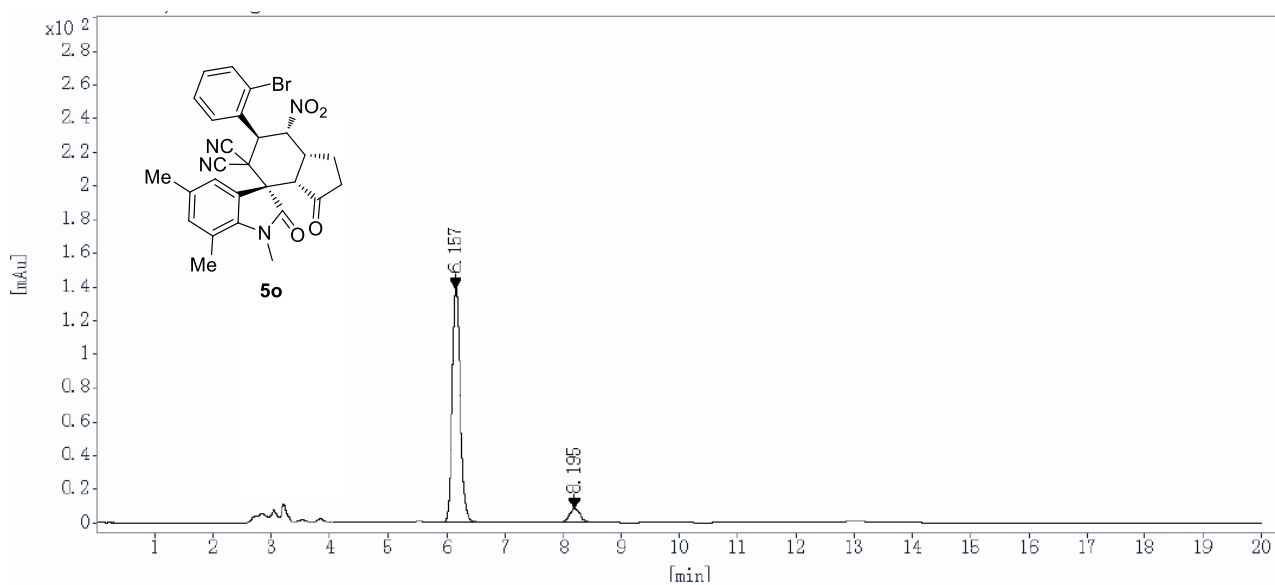

| Ret Time<br>[min] | Peak<br>Type | Width<br>[min] | Height<br>[mAU] | Area<br>[mAU*s] | Area<br>[%] |
|-------------------|--------------|----------------|-----------------|-----------------|-------------|
| 6.157             | BB           | 0.15           | 139.4192        | 1330.5614       | 92.5702     |
| 8.195             | BBA          | 0.20           | 8.1840          | 106.7920        | 7.4298      |

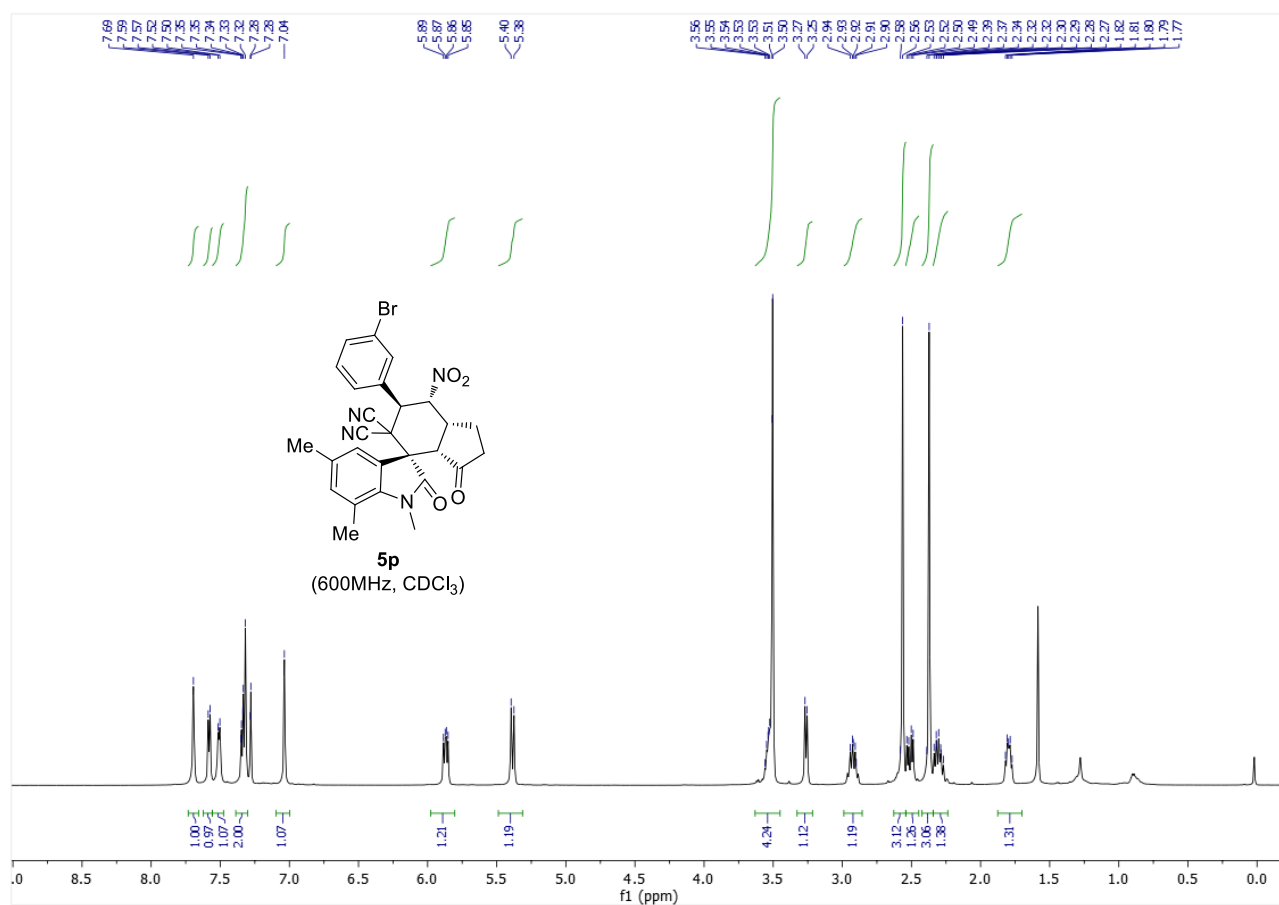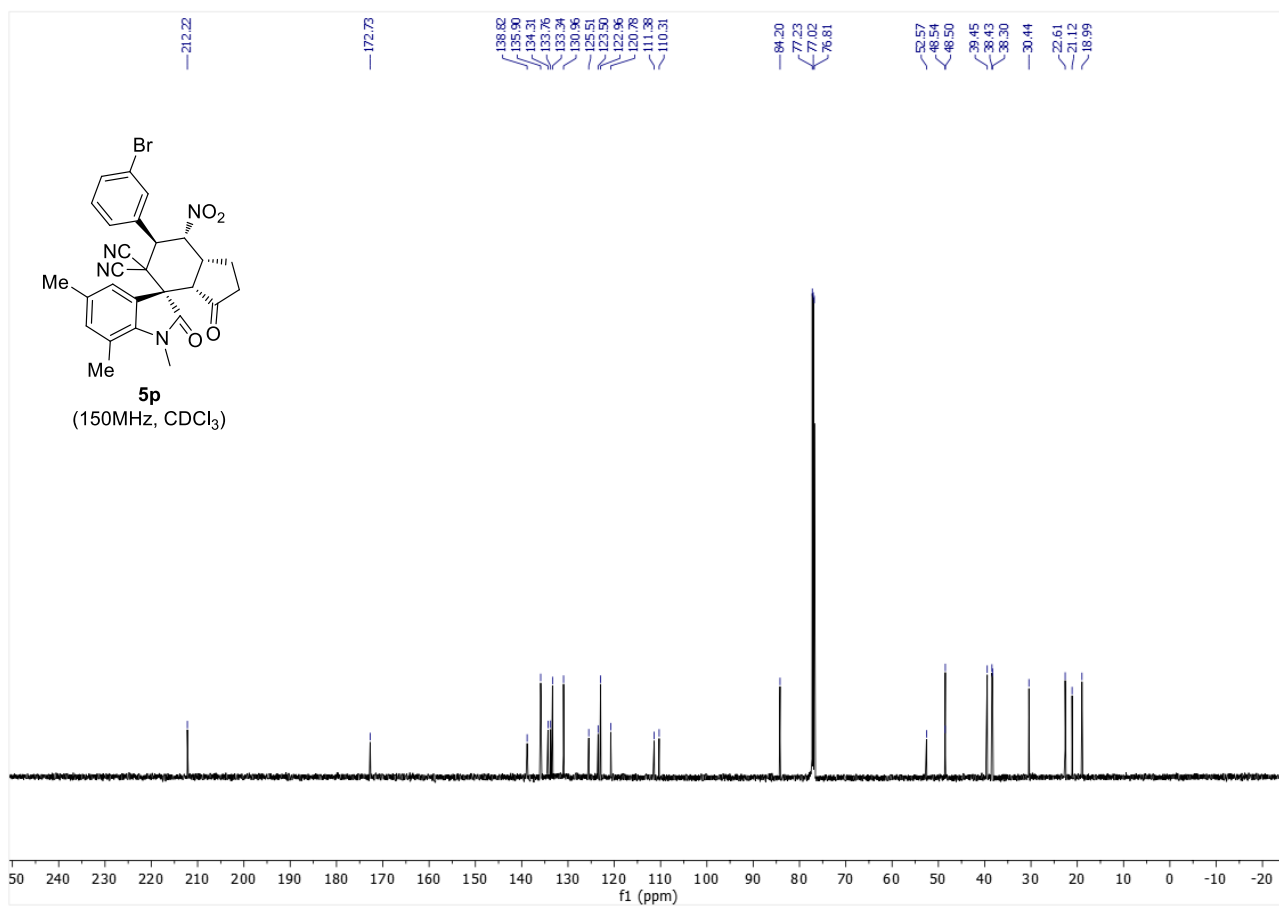

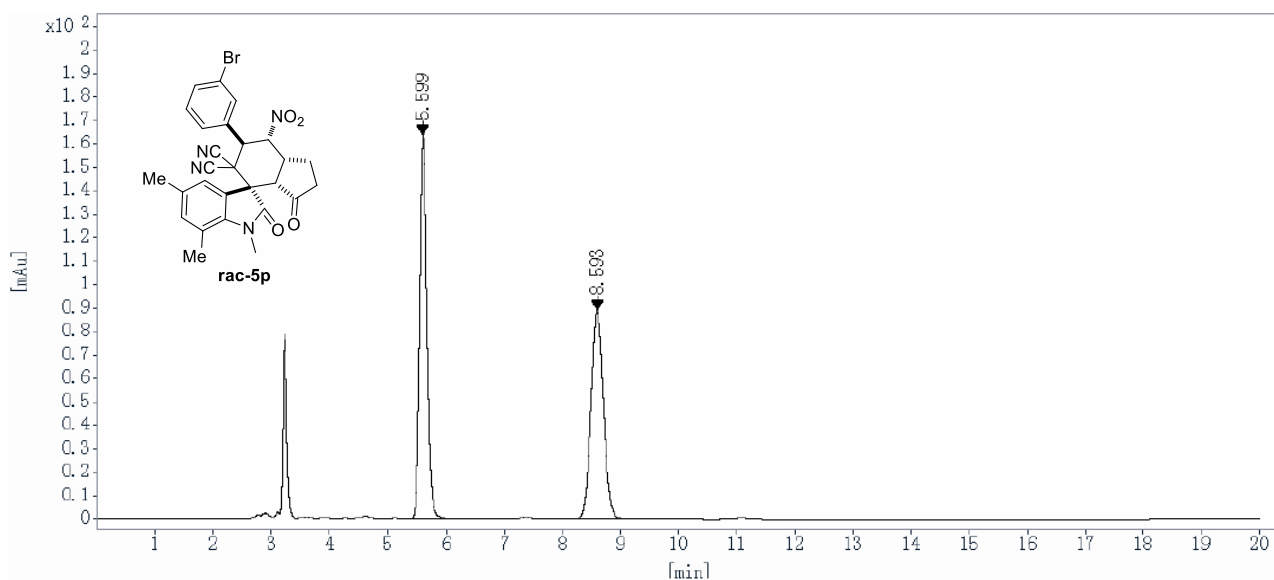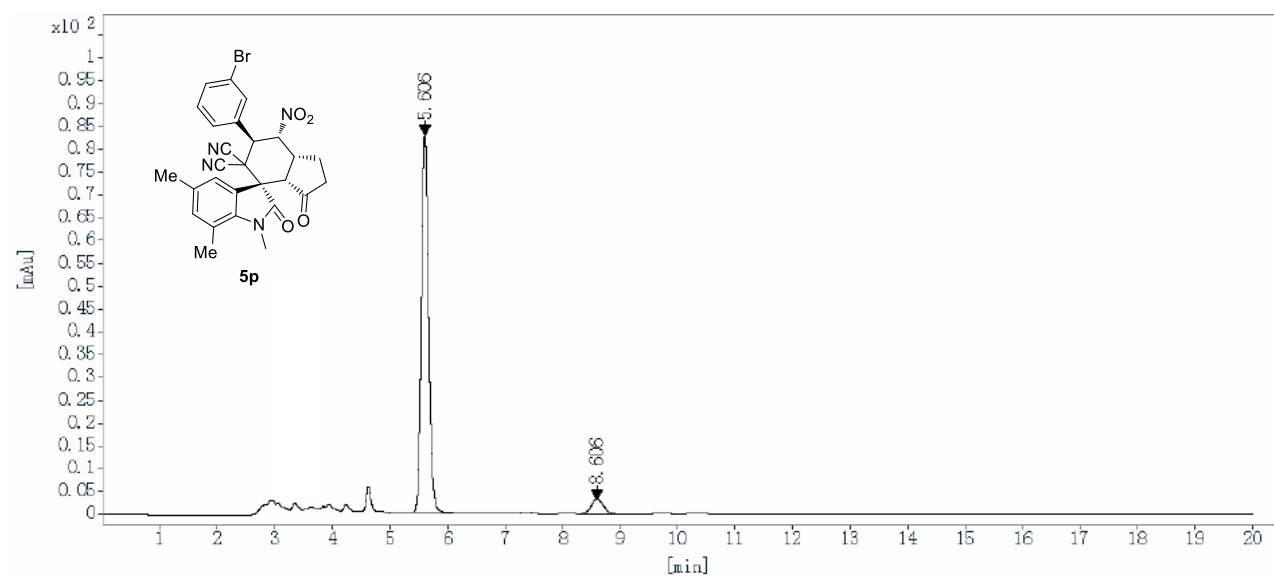

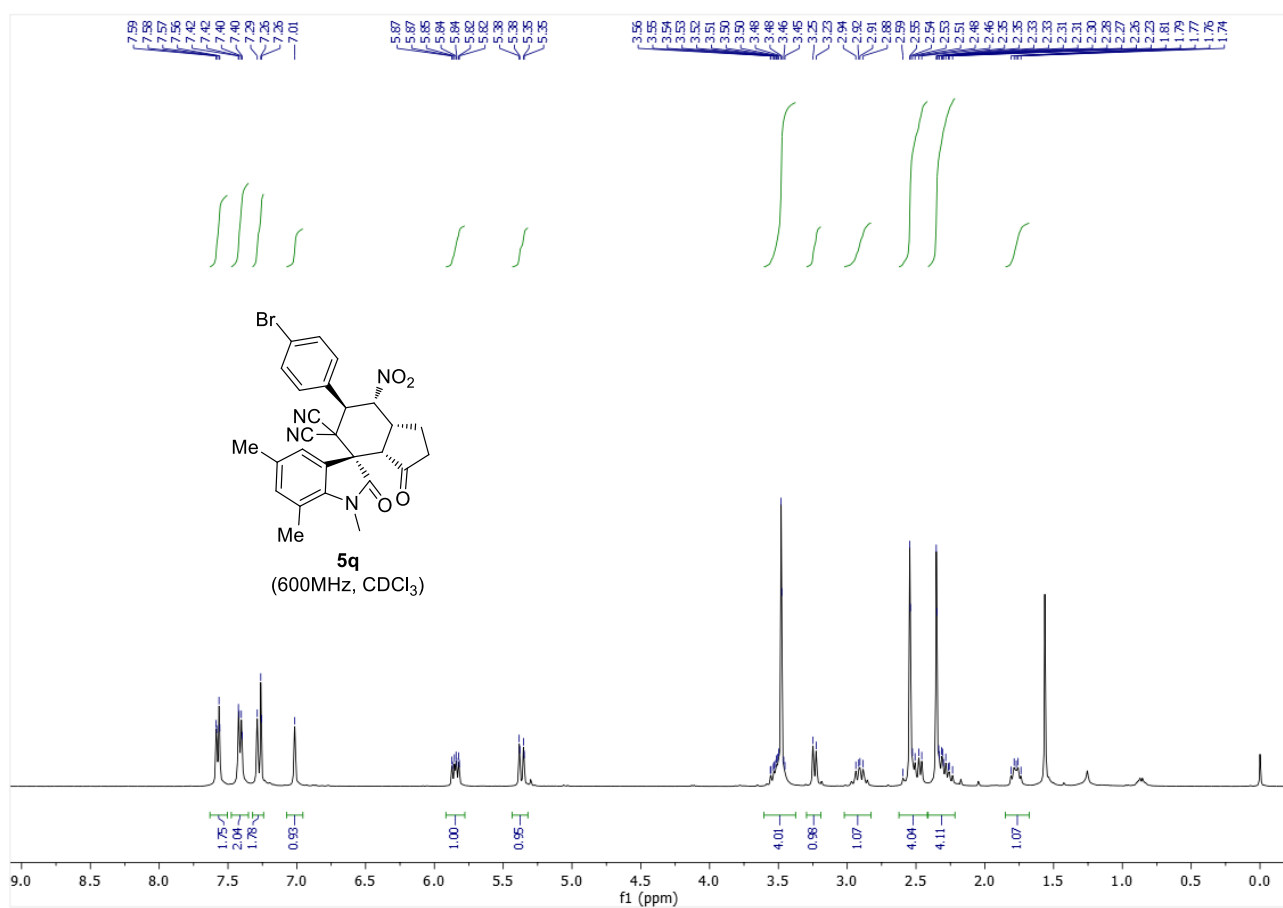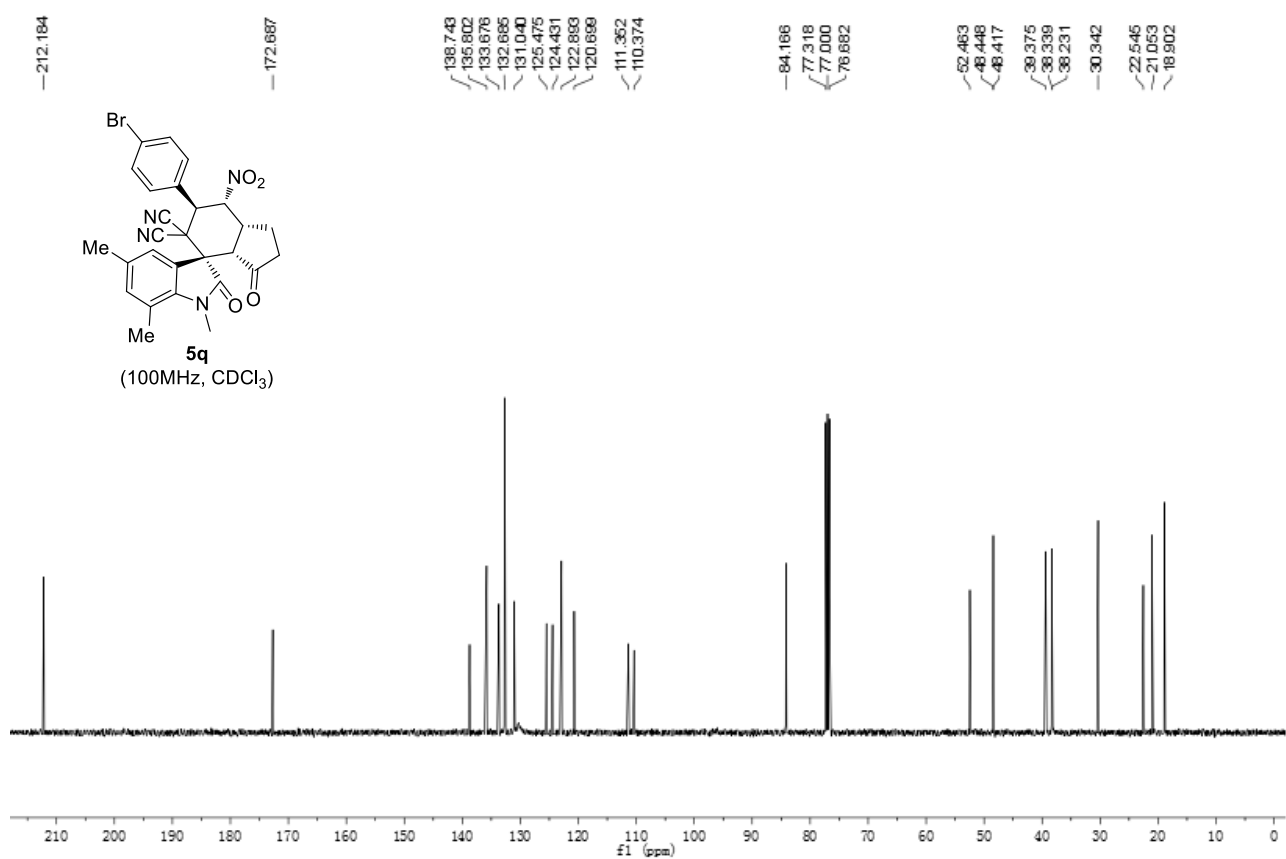

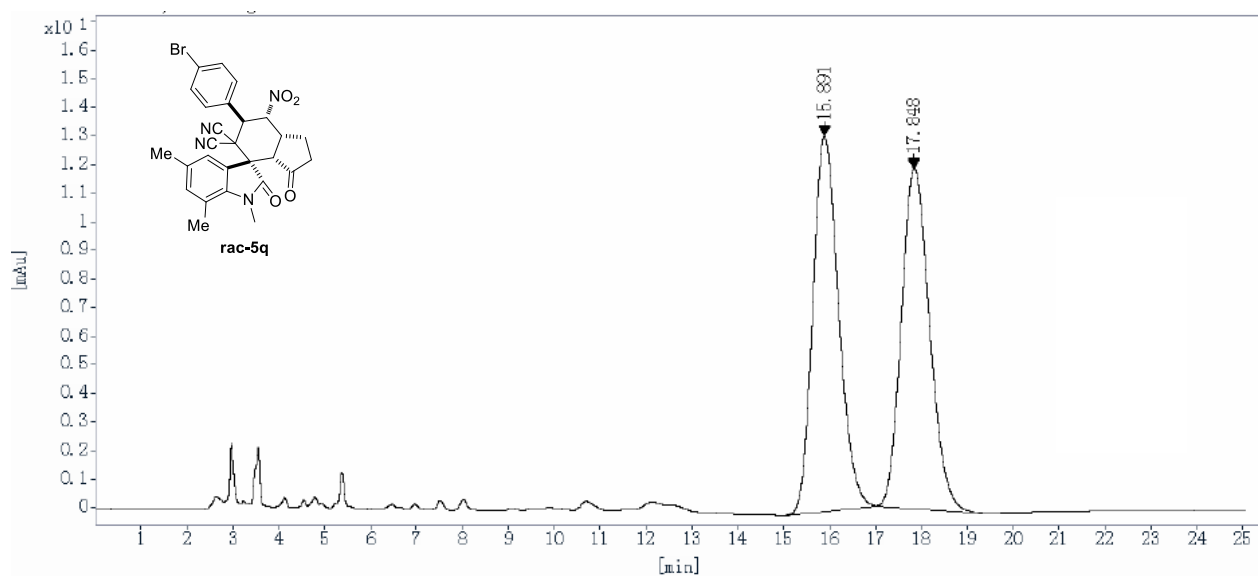

| Ret Time<br>[min] | Peak<br>Type | Width<br>[min] | Height<br>[mAU] | Area<br>[mAU*s] | Area<br>[%] |
|-------------------|--------------|----------------|-----------------|-----------------|-------------|
| 15.891            | BB           | 0.60           | 13.1100         | 510.7031        | 50.1822     |
| 17.848            | BB           | 0.66           | 11.8919         | 506.9955        | 49.8178     |

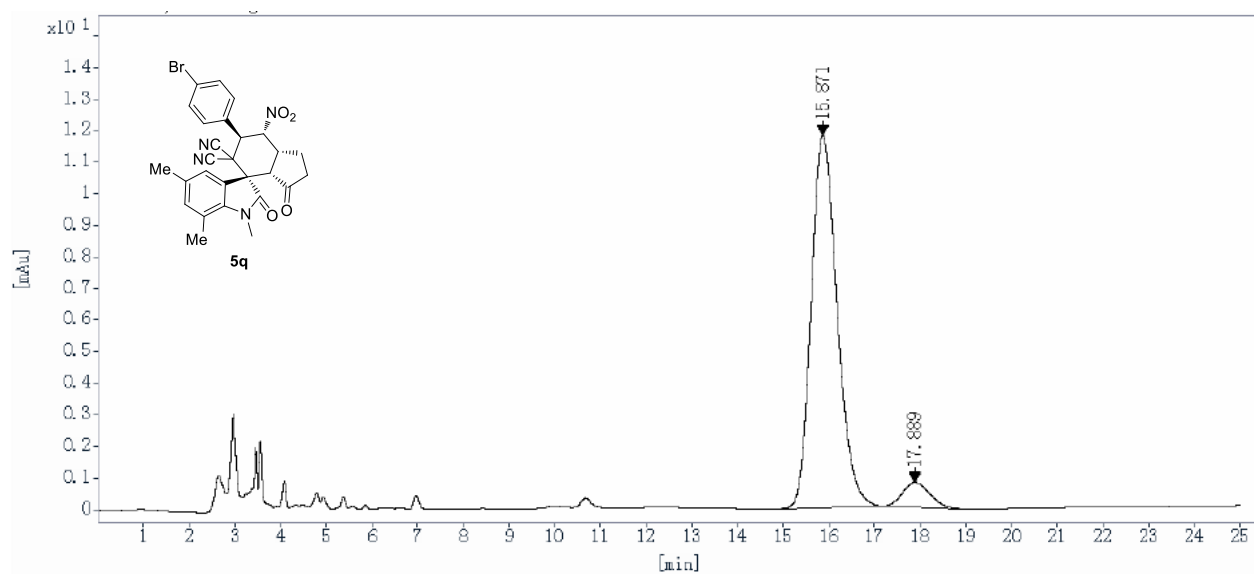

| Ret Time<br>[min] | Peak<br>Type | Width<br>[min] | Height<br>[mAU] | Area<br>[mAU*s] | Area<br>[%] |
|-------------------|--------------|----------------|-----------------|-----------------|-------------|
| 15.871            | BB           | 0.60           | 11.7712         | 463.4202        | 93.5805     |
| 17.889            | BB           | 0.50           | 0.7778          | 31.7898         | 6.4195      |



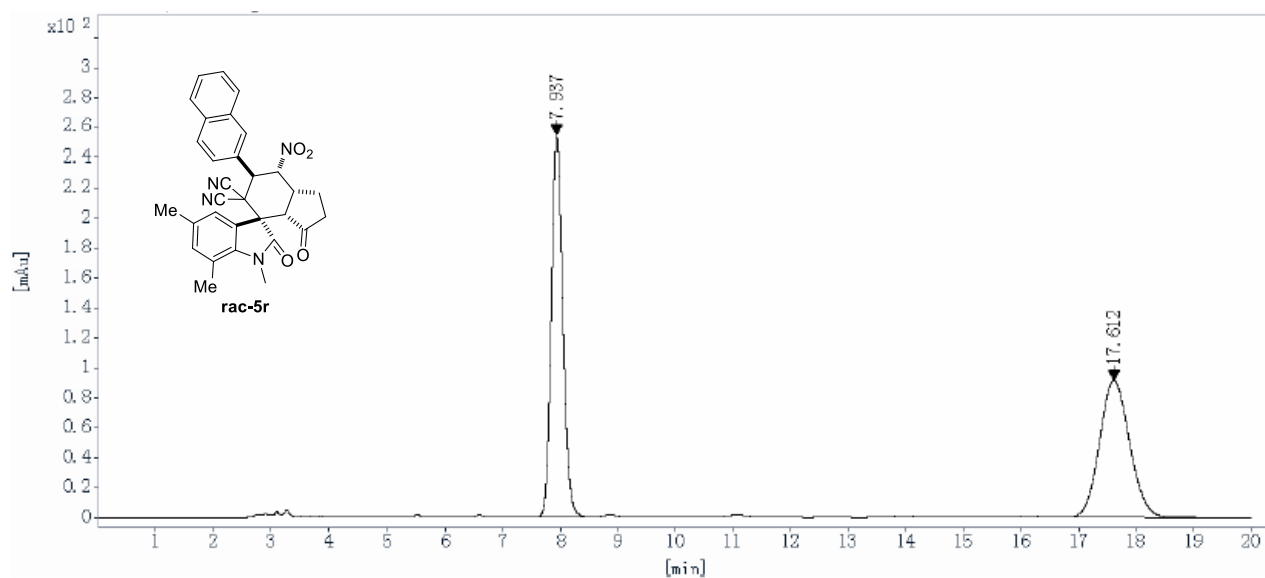

| Ret Time<br>[min] | Peak<br>Type | Width<br>[min] | Height<br>[mAU] | Area<br>[mAU*s] | Area<br>[%] |
|-------------------|--------------|----------------|-----------------|-----------------|-------------|
| 7.937             | BB           | 0.22           | 254.2308        | 3553.9900       | 51.6617     |
| 17.612            | BBA          | 0.57           | 91.3677         | 3325.3596       | 48.3383     |

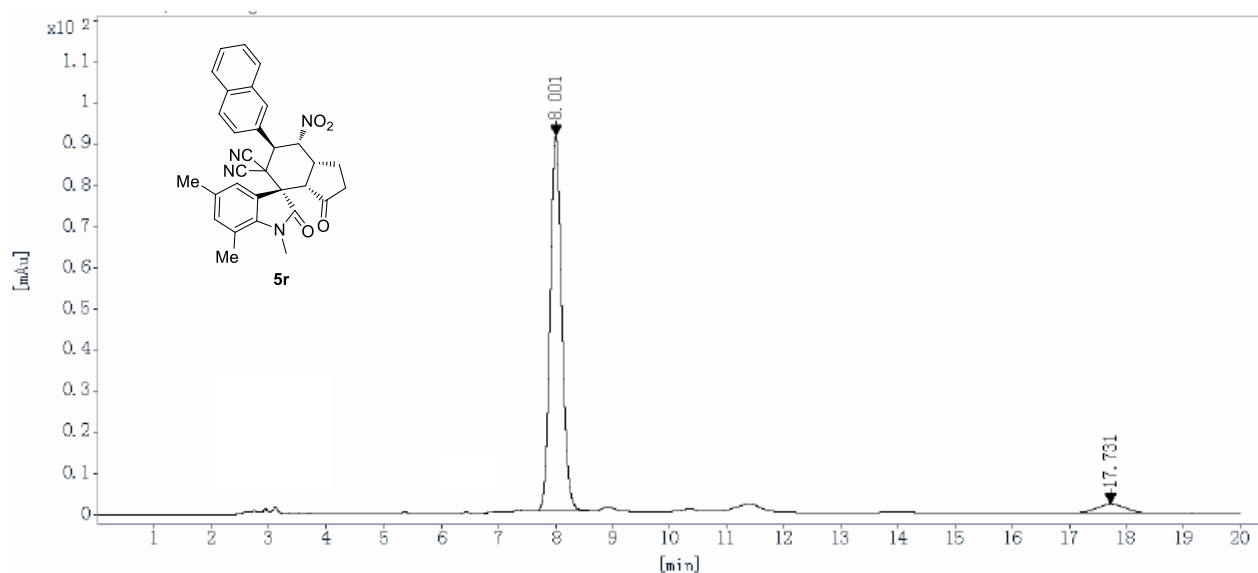

| Ret Time<br>[min] | Peak<br>Type | Width<br>[min] | Height<br>[mAU] | Area<br>[mAU*s] | Area<br>[%] |
|-------------------|--------------|----------------|-----------------|-----------------|-------------|
| 8.001             | BB           | 0.22           | 91.0733         | 1299.8302       | 94.2841     |
| 17.731            | BB           | 0.54           | 2.1994          | 78.8008         | 5.7159      |



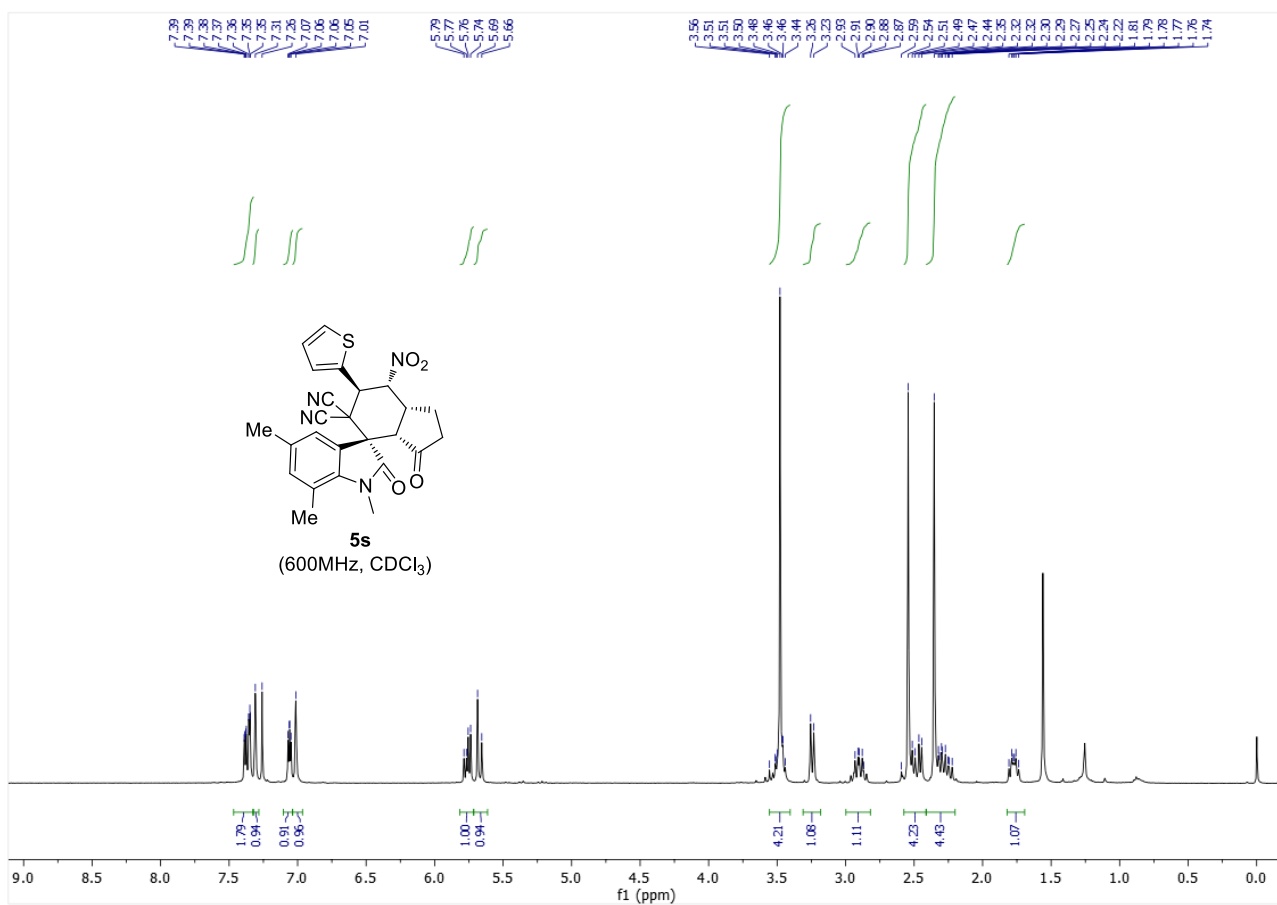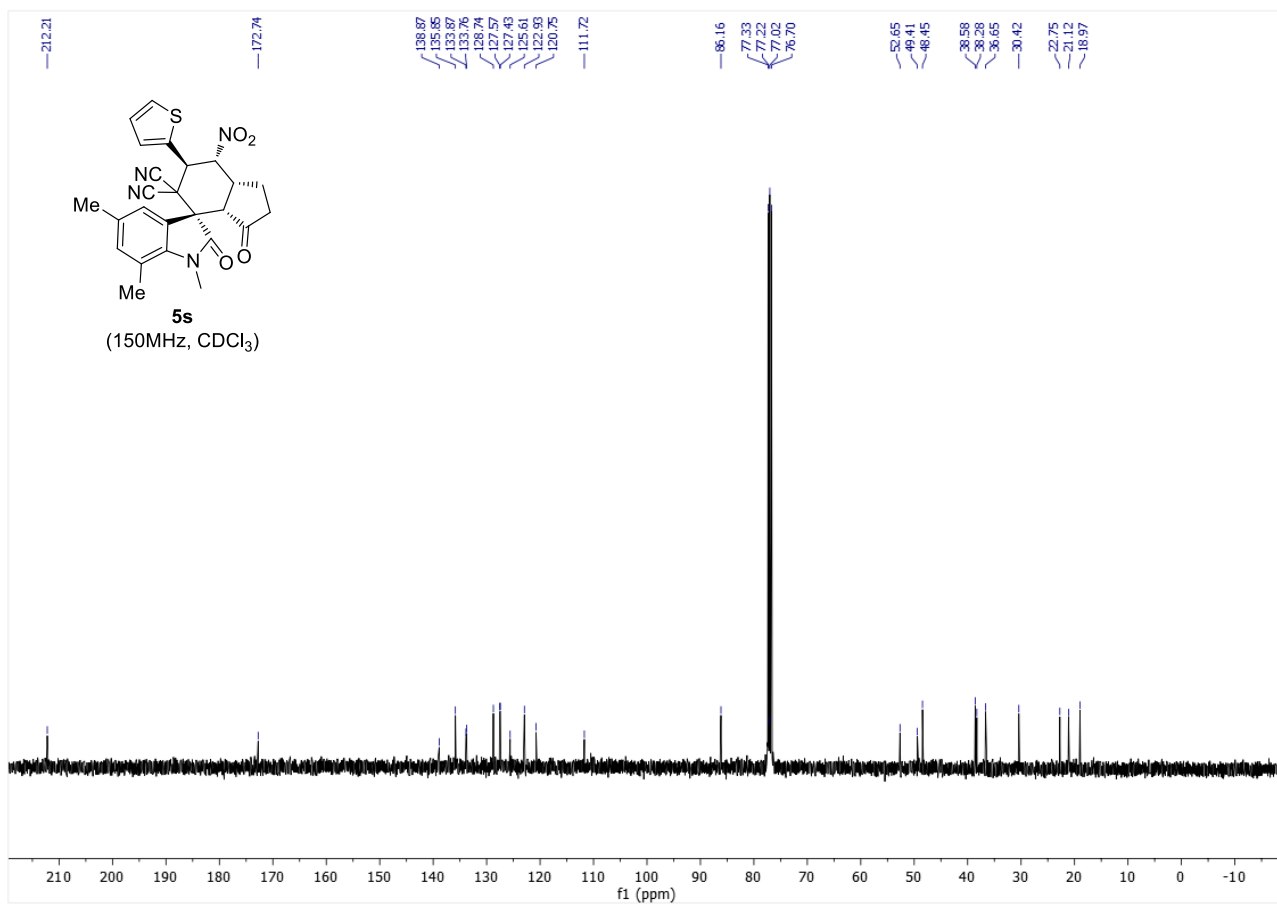

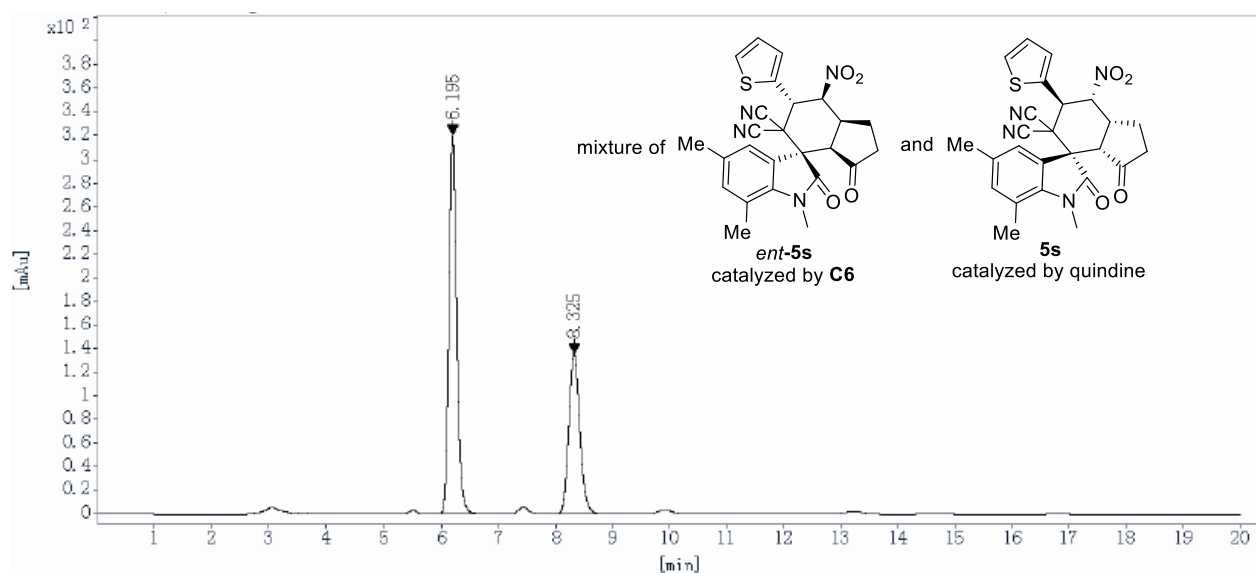

| Ret Time [min] | Peak Type | Width [min] | Height [mAU] | Area [mAU*s] | Area [%] |
|----------------|-----------|-------------|--------------|--------------|----------|
| 6.195          | BB        | 0.15        | 319.6223     | 3068.2593    | 62.6669  |
| 8.325          | BB        | 0.21        | 135.8993     | 1827.8781    | 37.3331  |

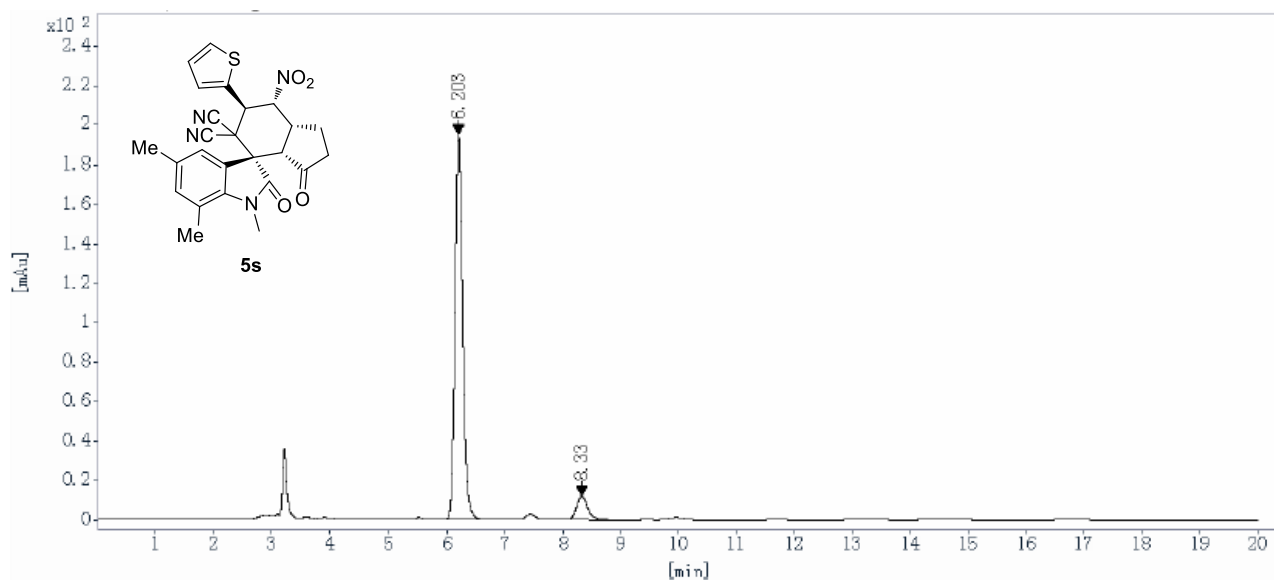

| Ret Time [min] | Peak Type | Width [min] | Height [mAU] | Area [mAU*s] | Area [%] |
|----------------|-----------|-------------|--------------|--------------|----------|
| 6.203          | BBA       | 0.14        | 194.7155     | 1813.7520    | 92.0495  |
| 8.330          | BB        | 0.21        | 11.6859      | 156.6579     | 7.9505   |

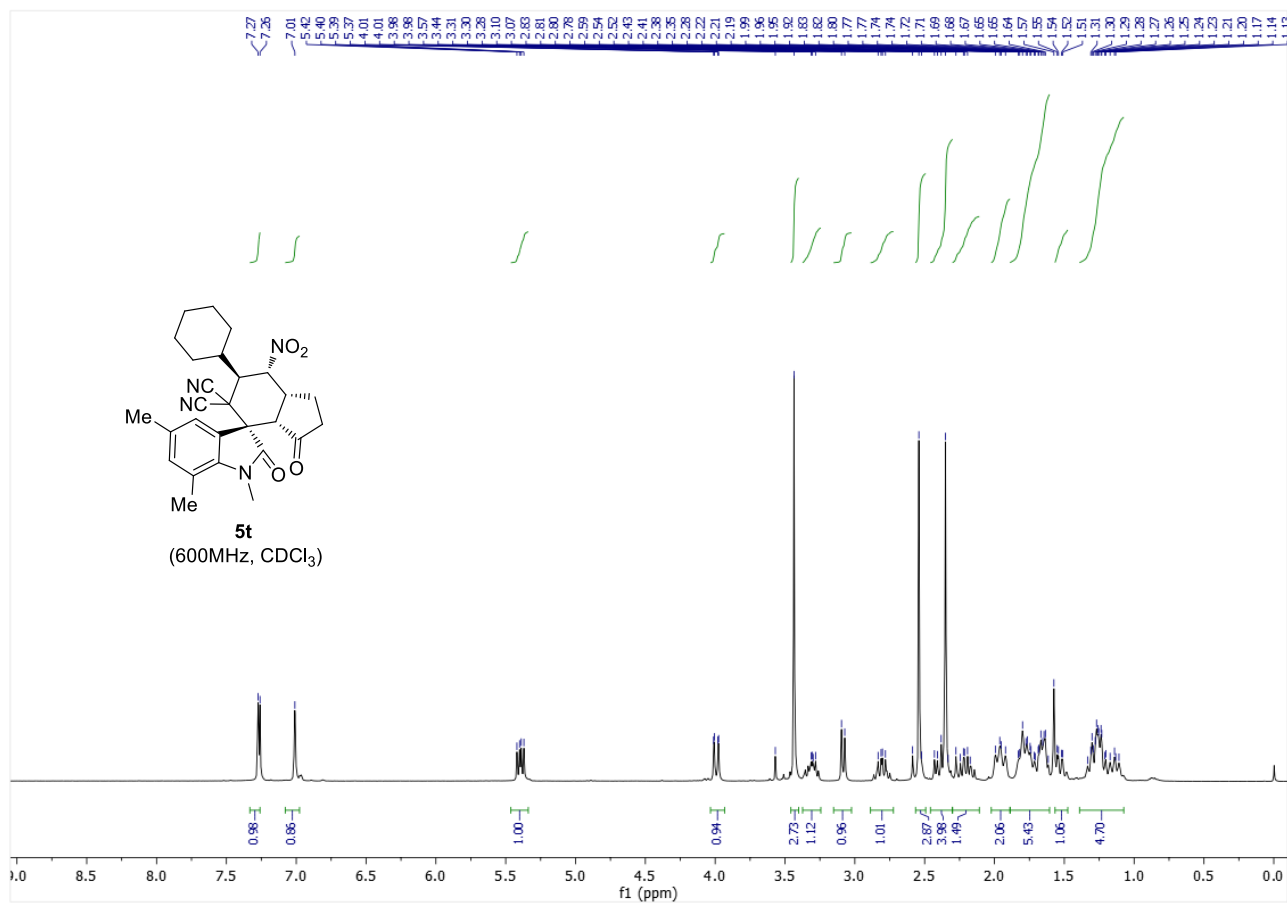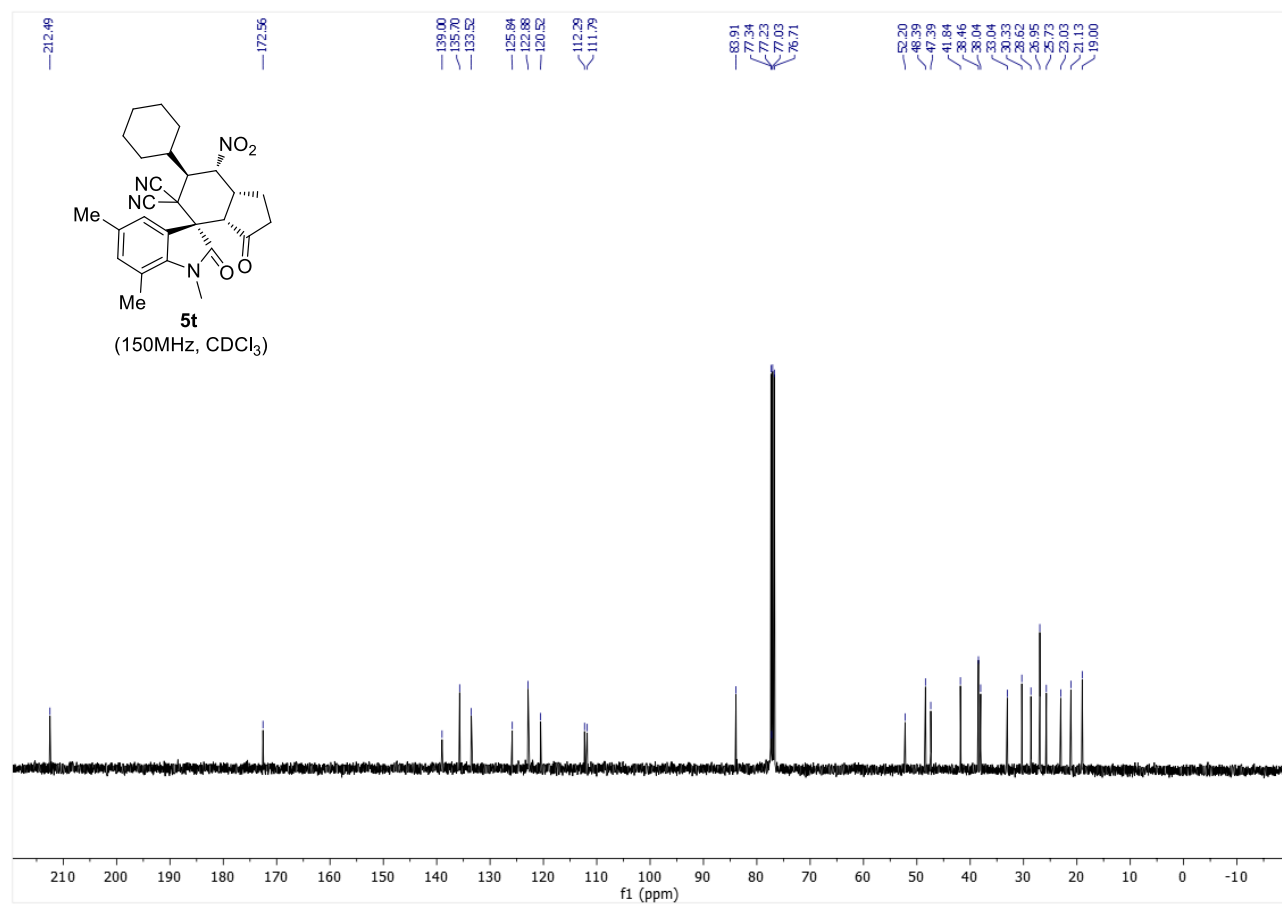

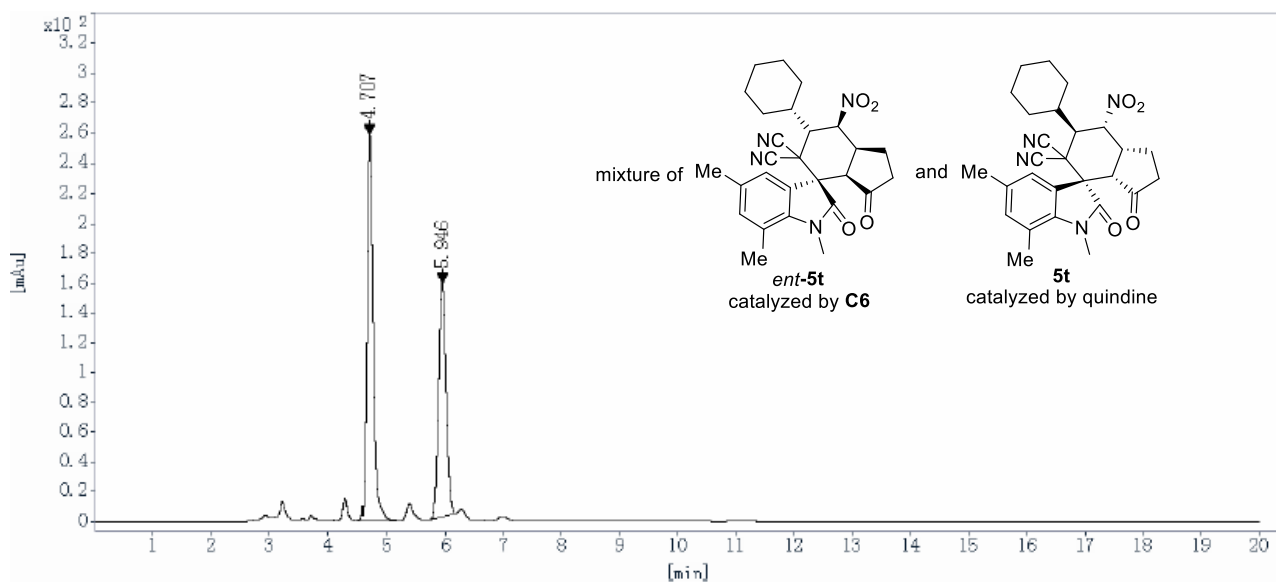

| Ret Time [min] | Peak Type | Width [min] | Height [mAU] | Area [mAU*s] | Area [%] |
|----------------|-----------|-------------|--------------|--------------|----------|
| 4.707          | BB        | 0.11        | 257.7388     | 1850.9292    | 56.9245  |
| 5.946          | BB        | 0.14        | 156.9358     | 1400.6216    | 43.0755  |

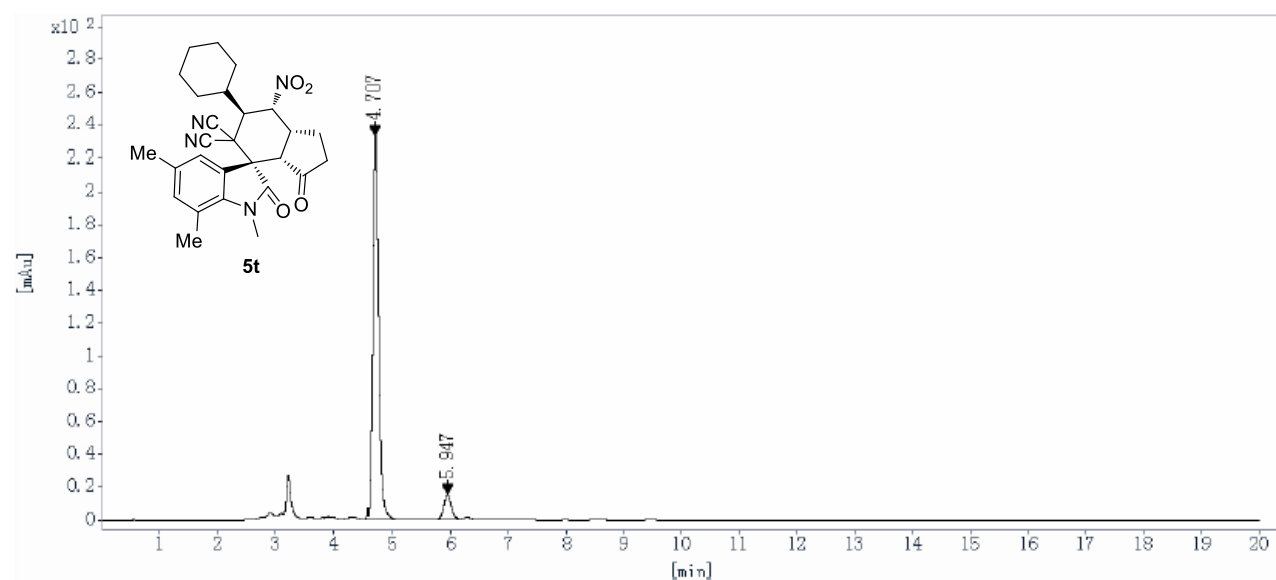

| Ret Time [min] | Peak Type | Width [min] | Height [mAU] | Area [mAU*s] | Area [%] |
|----------------|-----------|-------------|--------------|--------------|----------|
| 4.707          | BB        | 0.11        | 232.7814     | 1625.1051    | 92.5136  |
| 5.947          | BB        | 0.14        | 14.8609      | 131.5076     | 7.4864   |



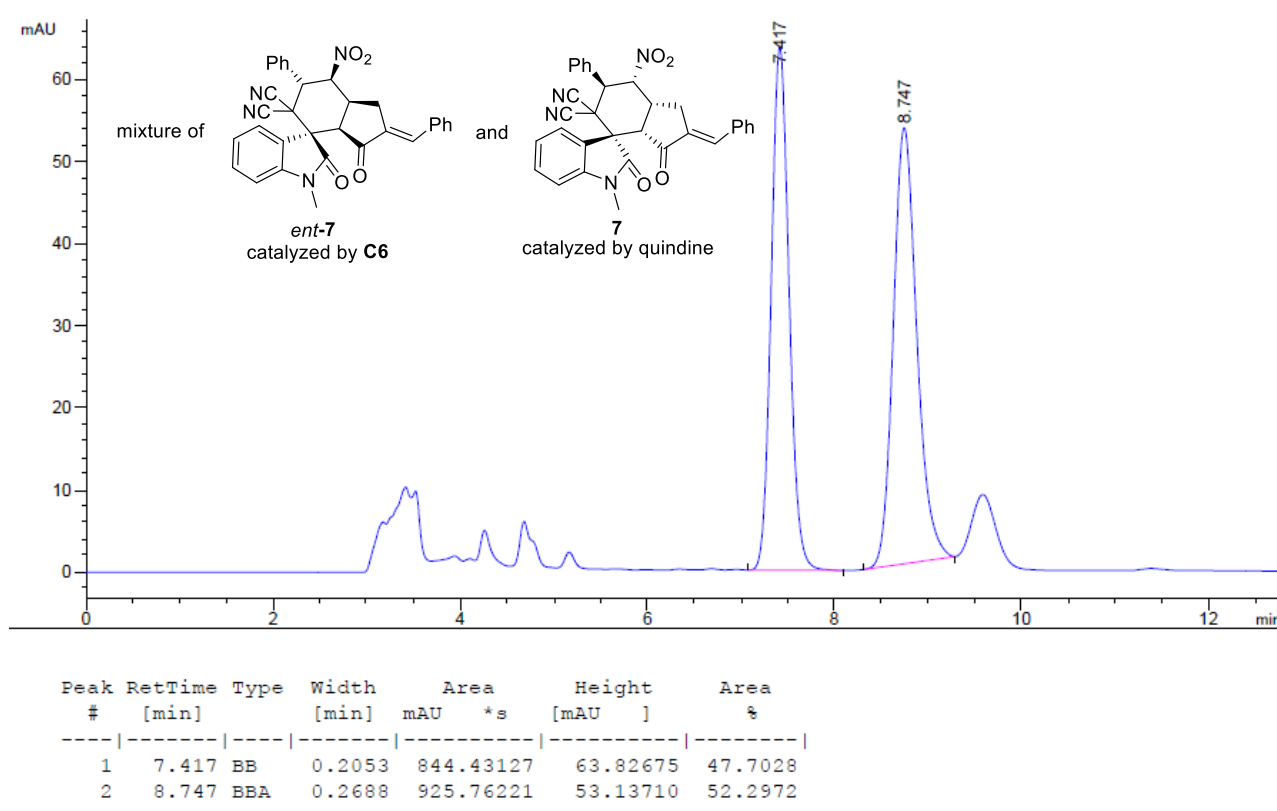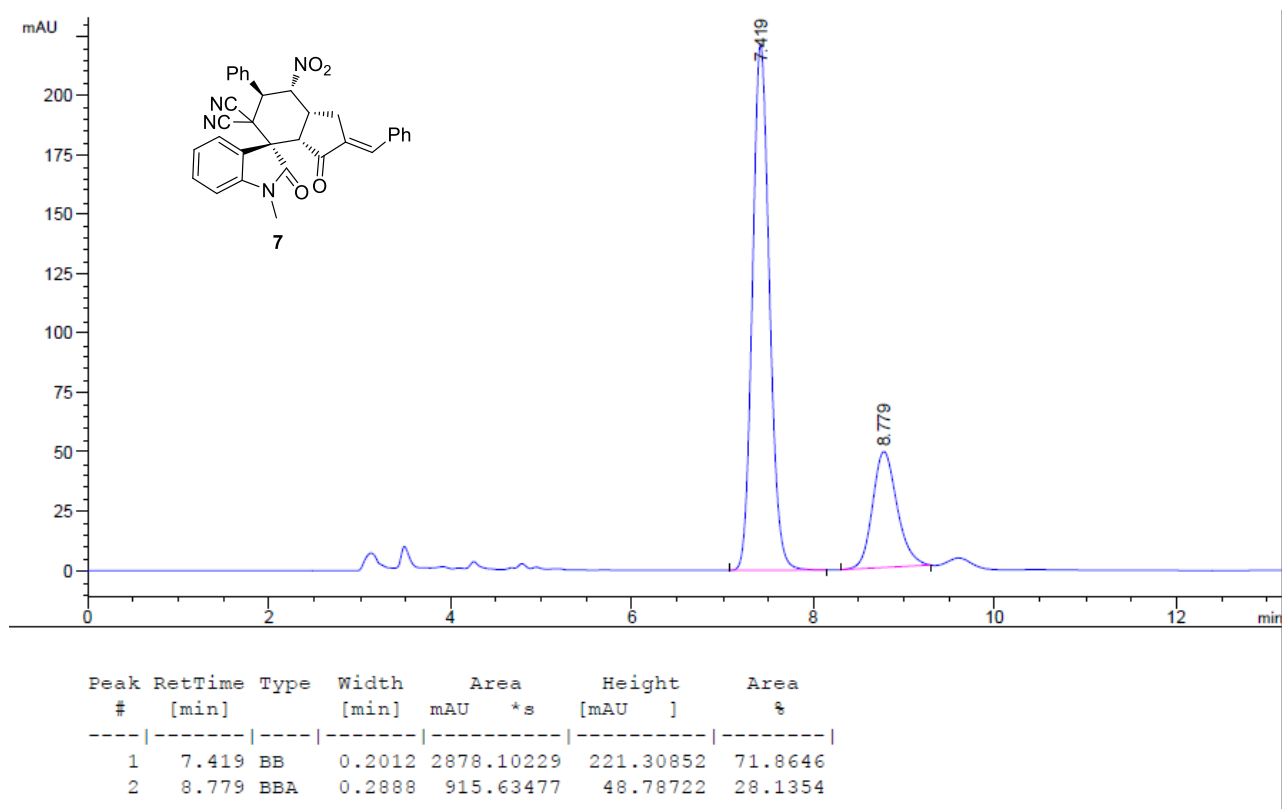

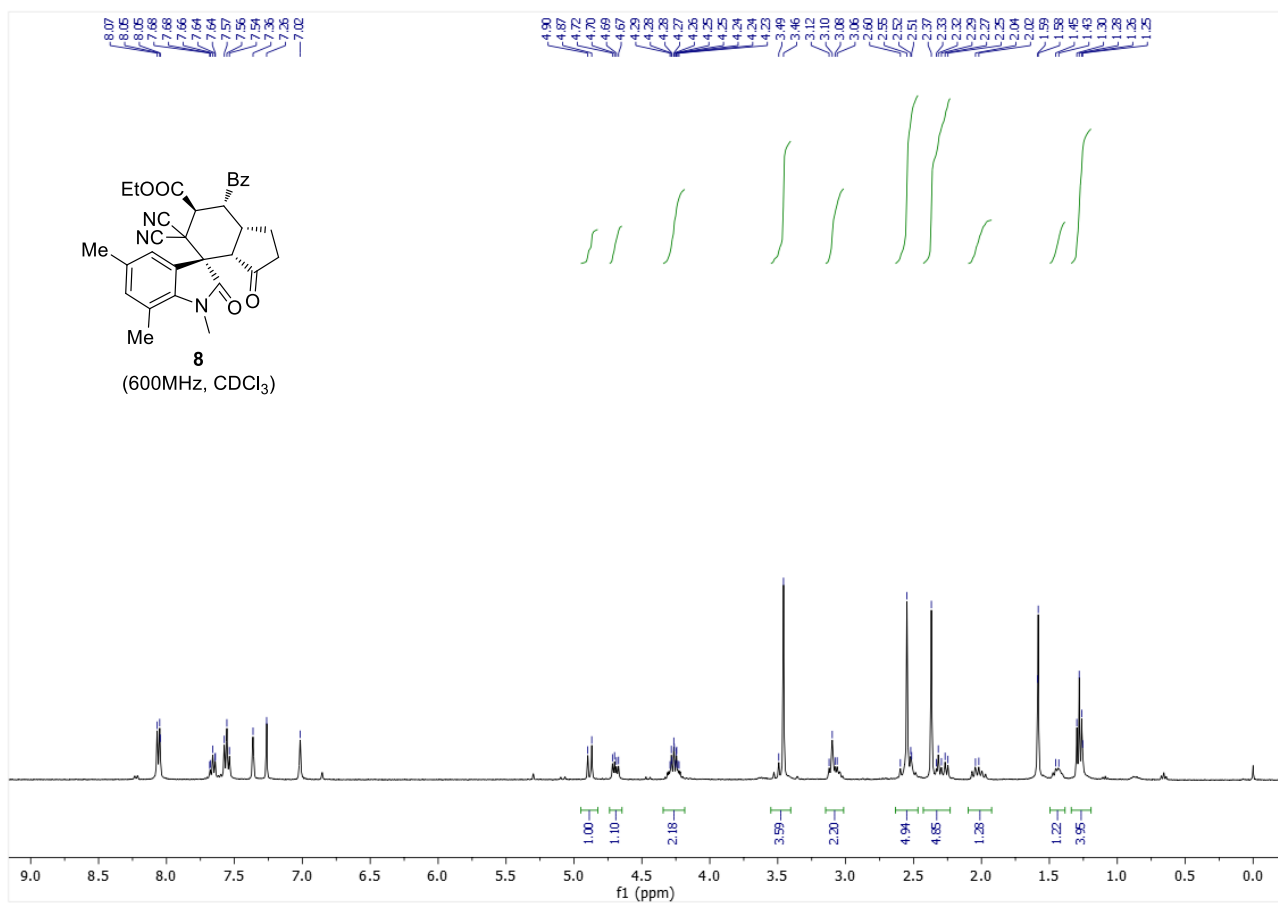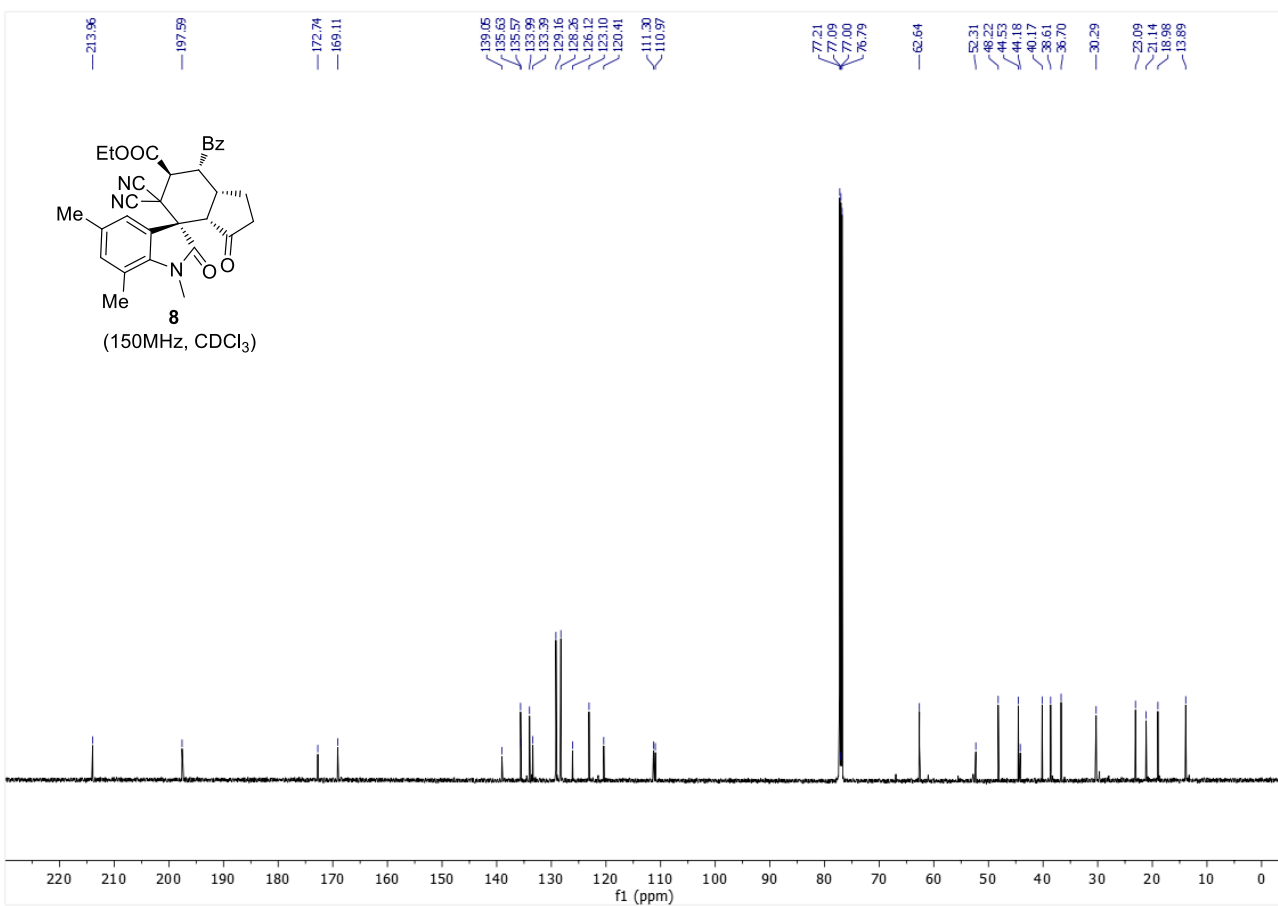

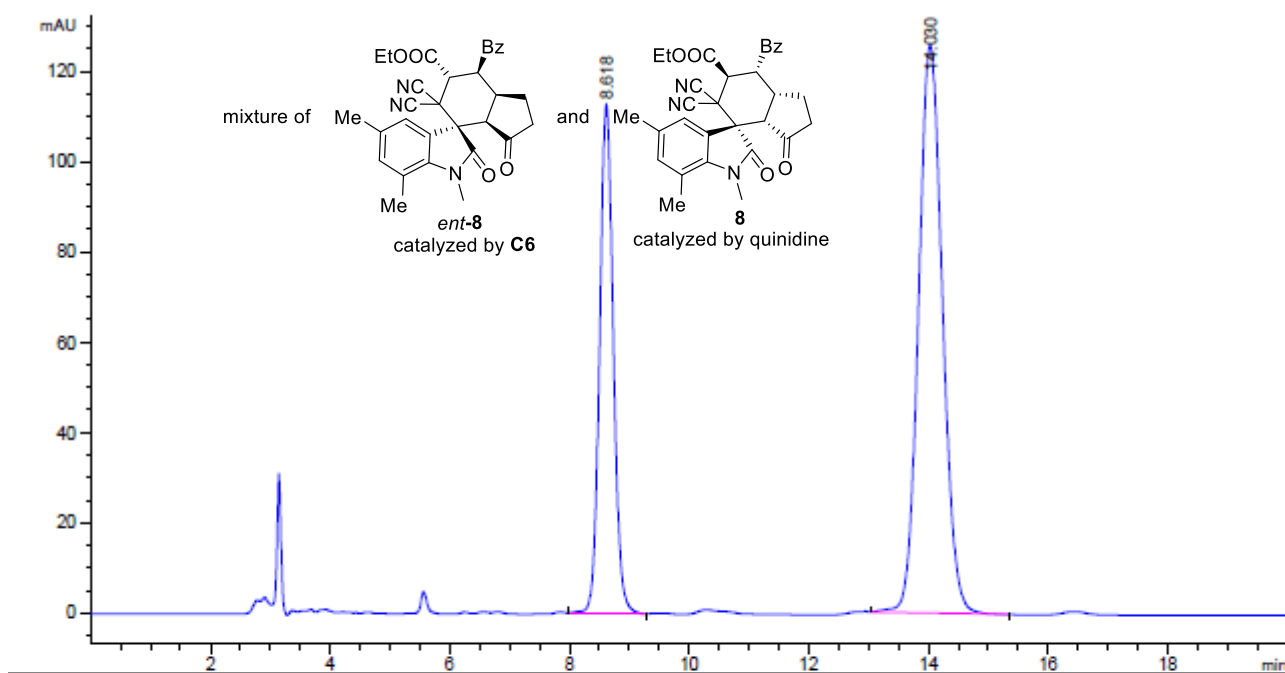

| Ret Time [min] | Peak Type | Width [min] | Height [mAU] | Area [mAU*s] | Area [%] |
|----------------|-----------|-------------|--------------|--------------|----------|
| 8.618          | BB        | 0.2455      | 112.76895    | 1792.55115   | 33.8867  |
| 14.030         | BB        | 0.4322      | 125.86776    | 3497.28491   | 66.1133  |

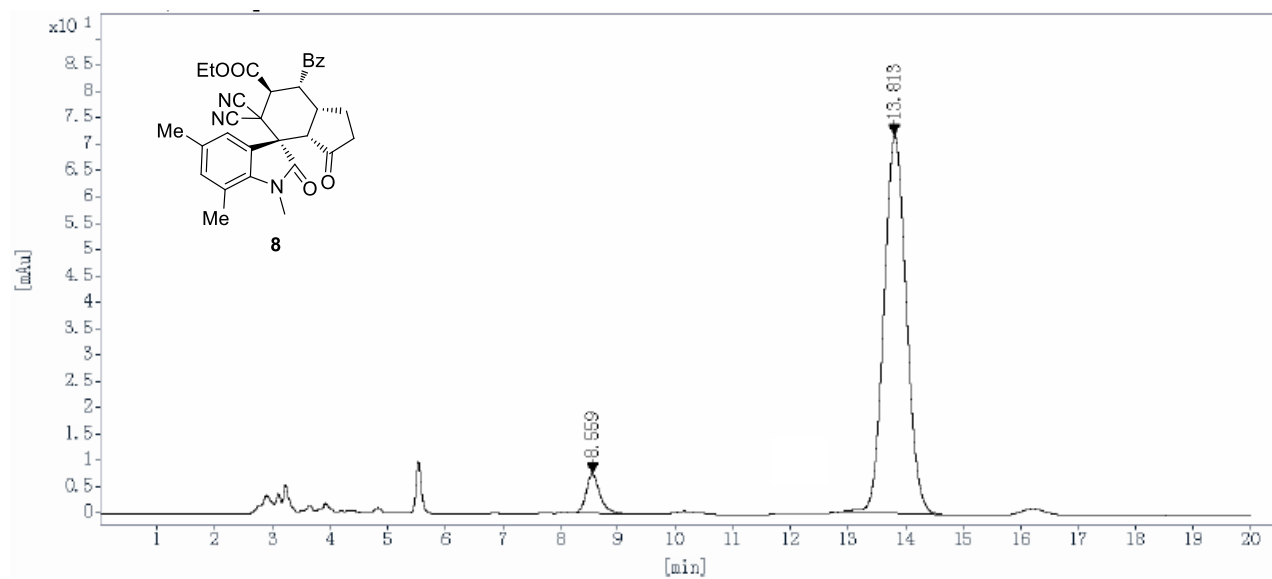

| Ret Time [min] | Peak Type | Width [min] | Height [mAU] | Area [mAU*s] | Area [%] |
|----------------|-----------|-------------|--------------|--------------|----------|
| 8.559          | BB        | 0.25        | 7.5587       | 123.9443     | 6.0385   |
| 13.813         | BB        | 0.42        | 71.6338      | 1928.6392    | 93.9615  |



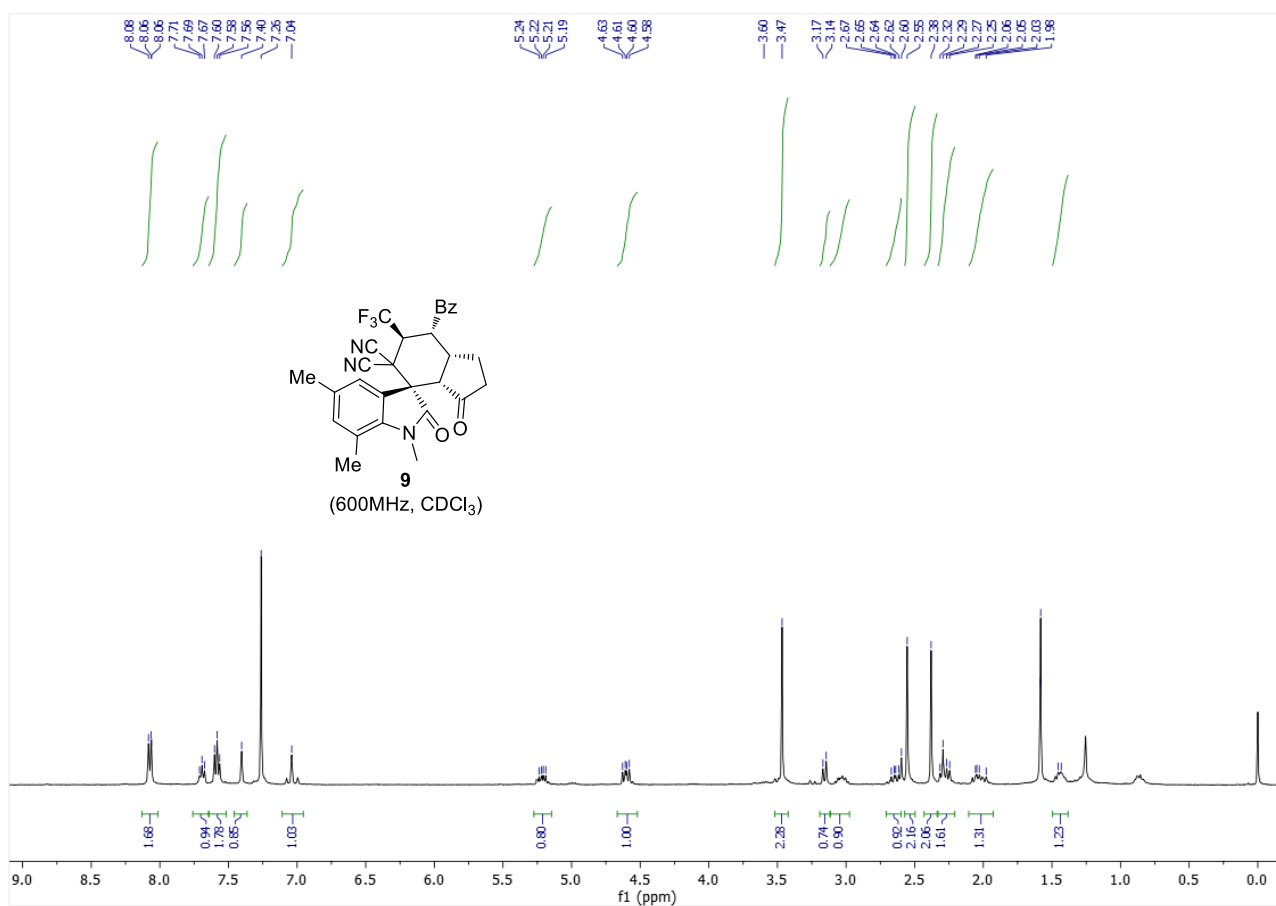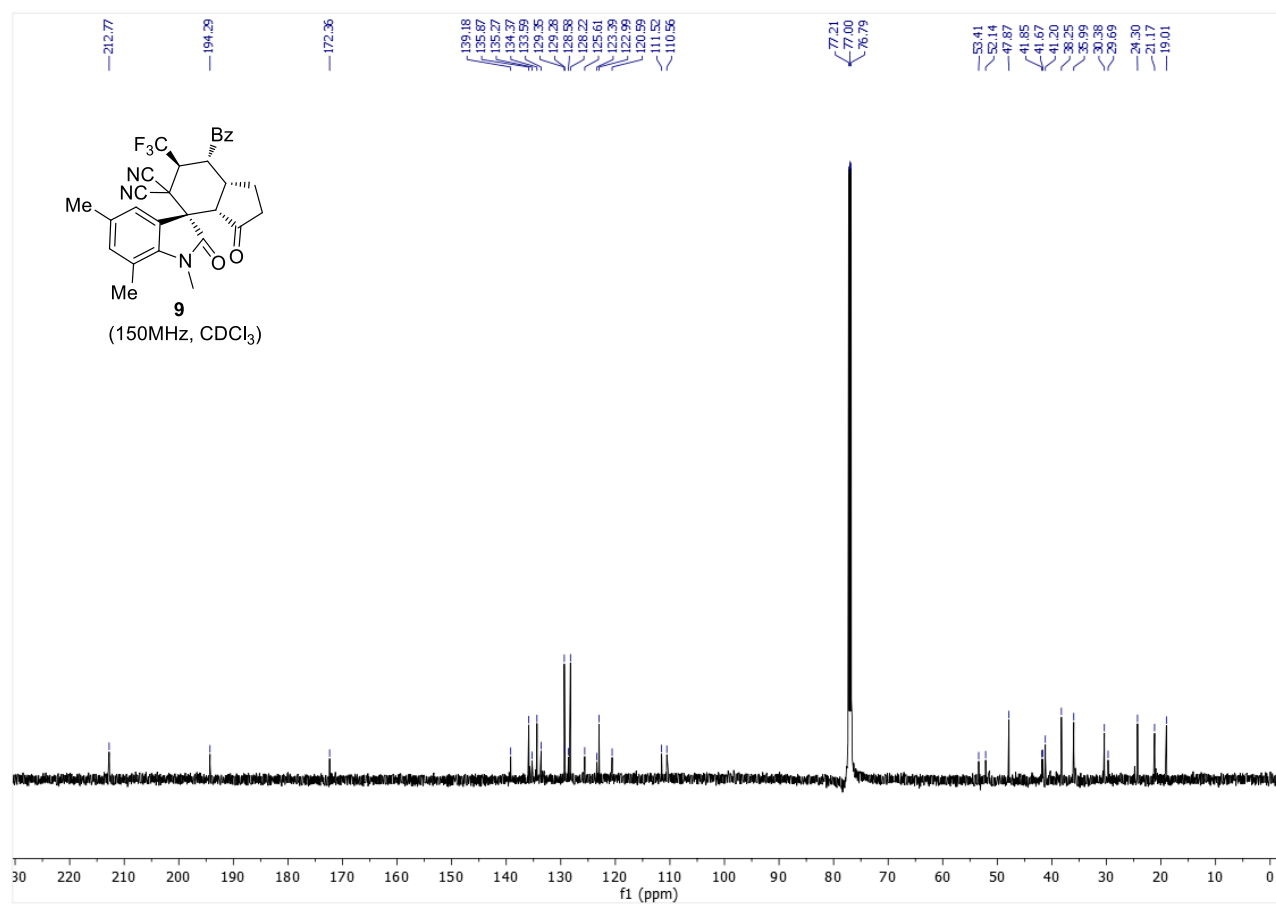

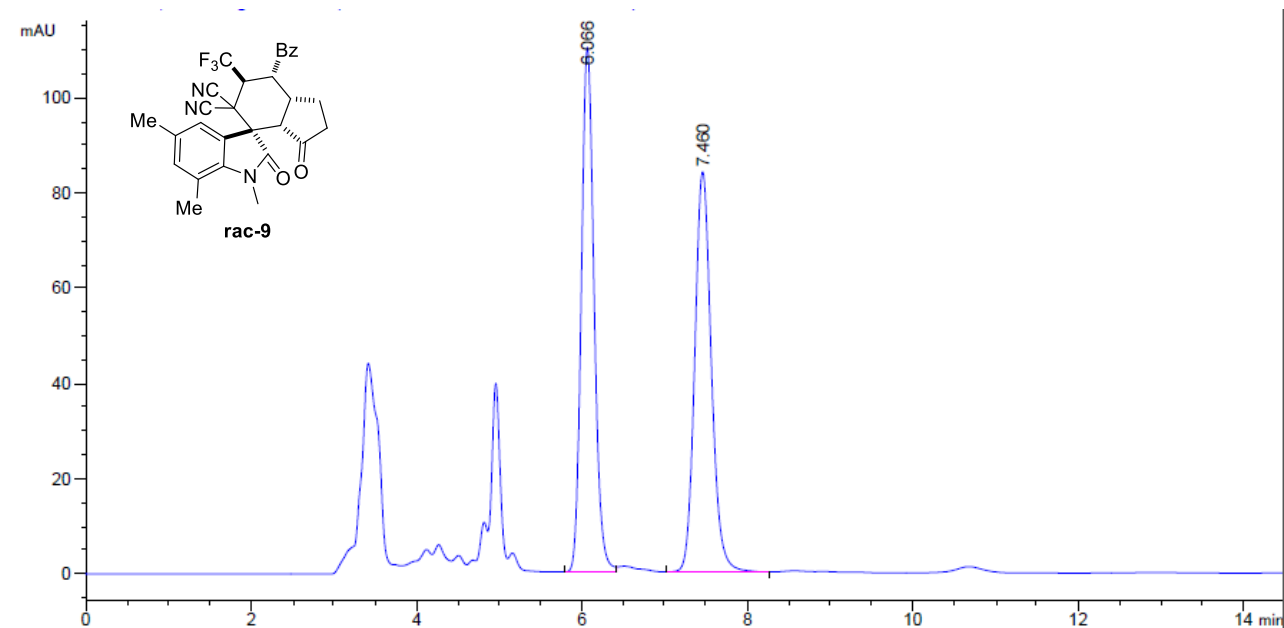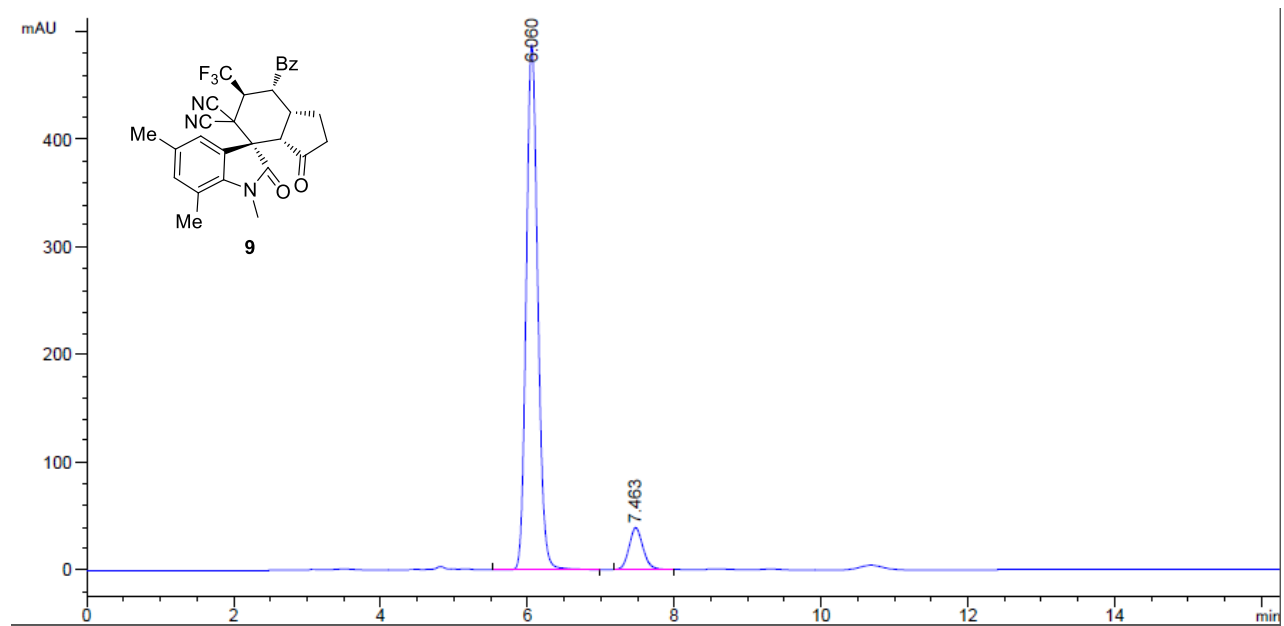

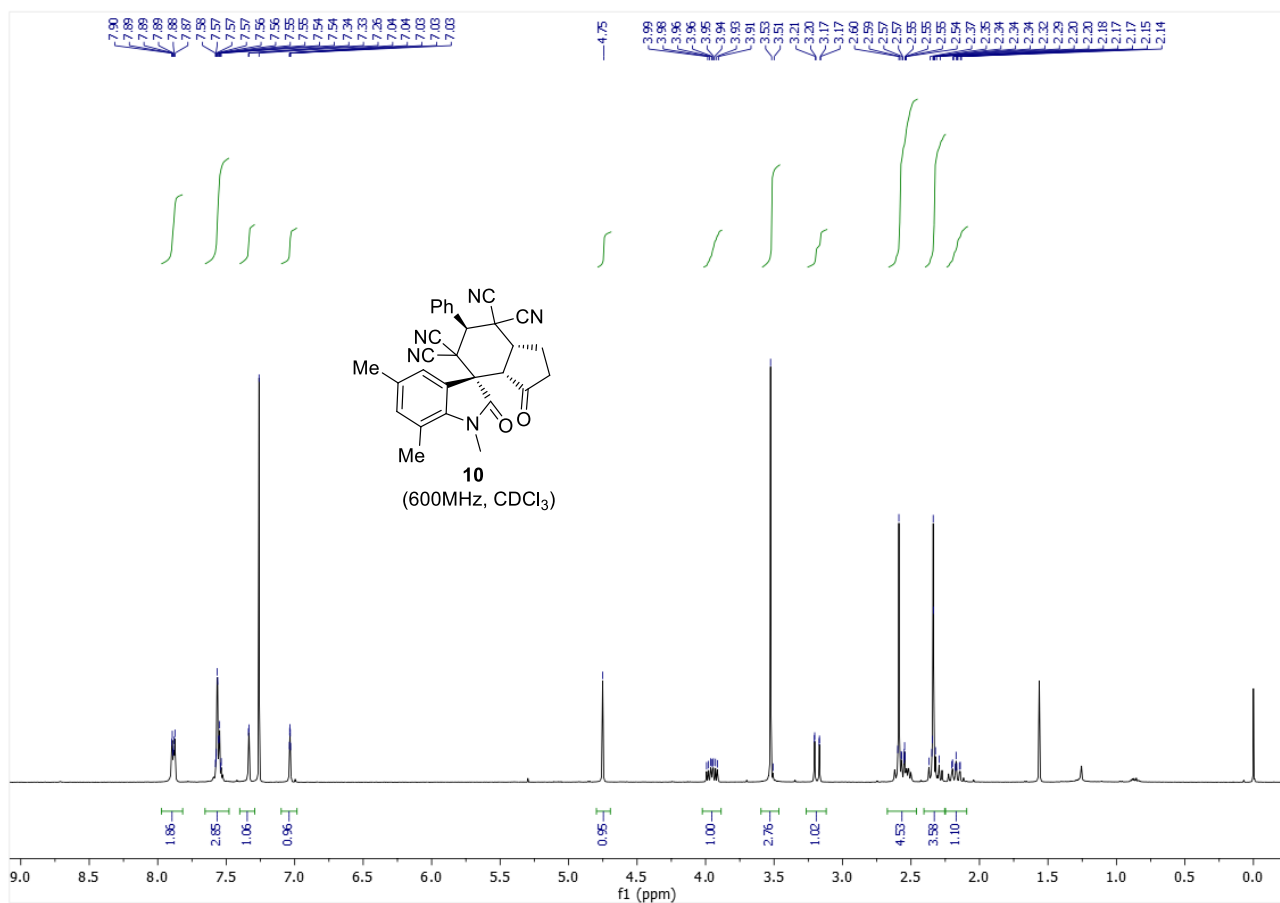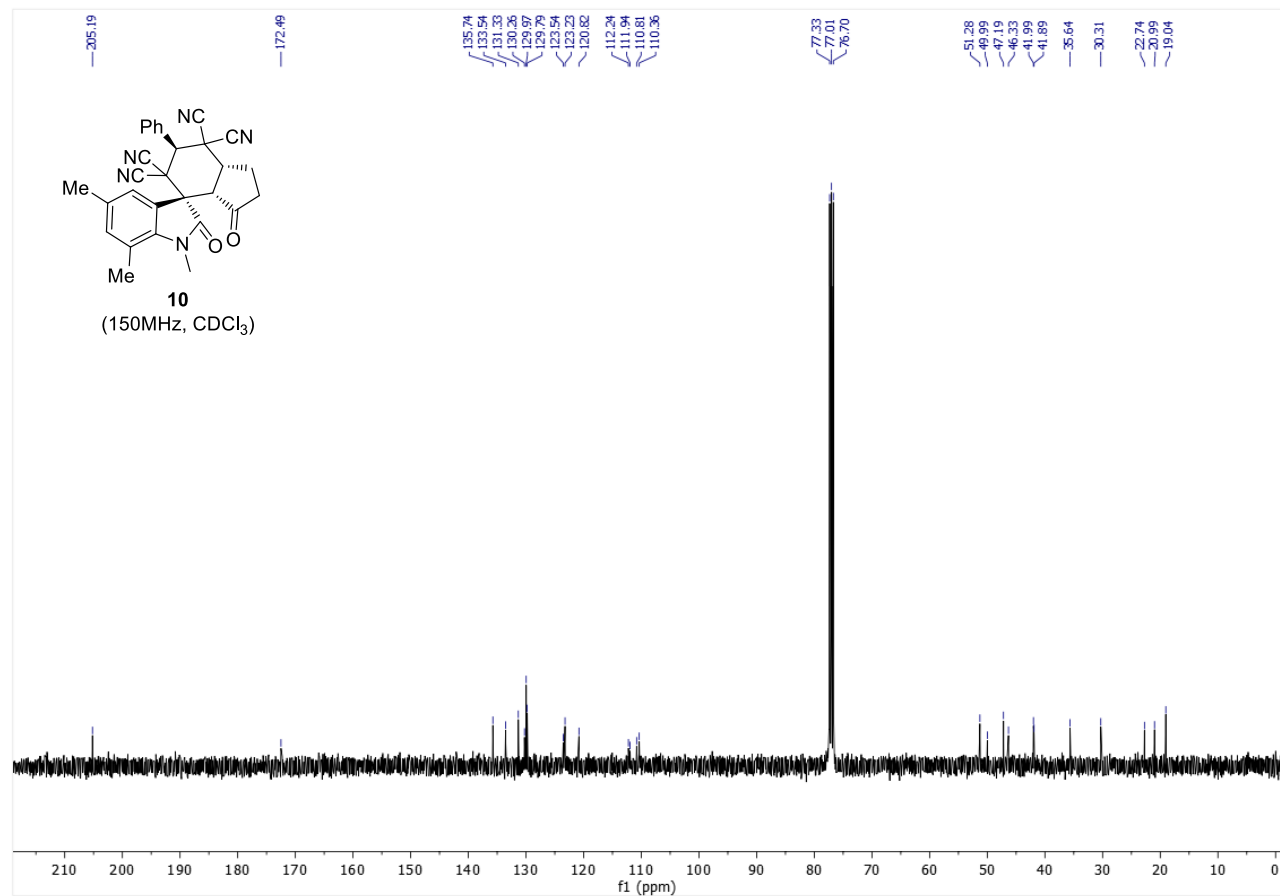

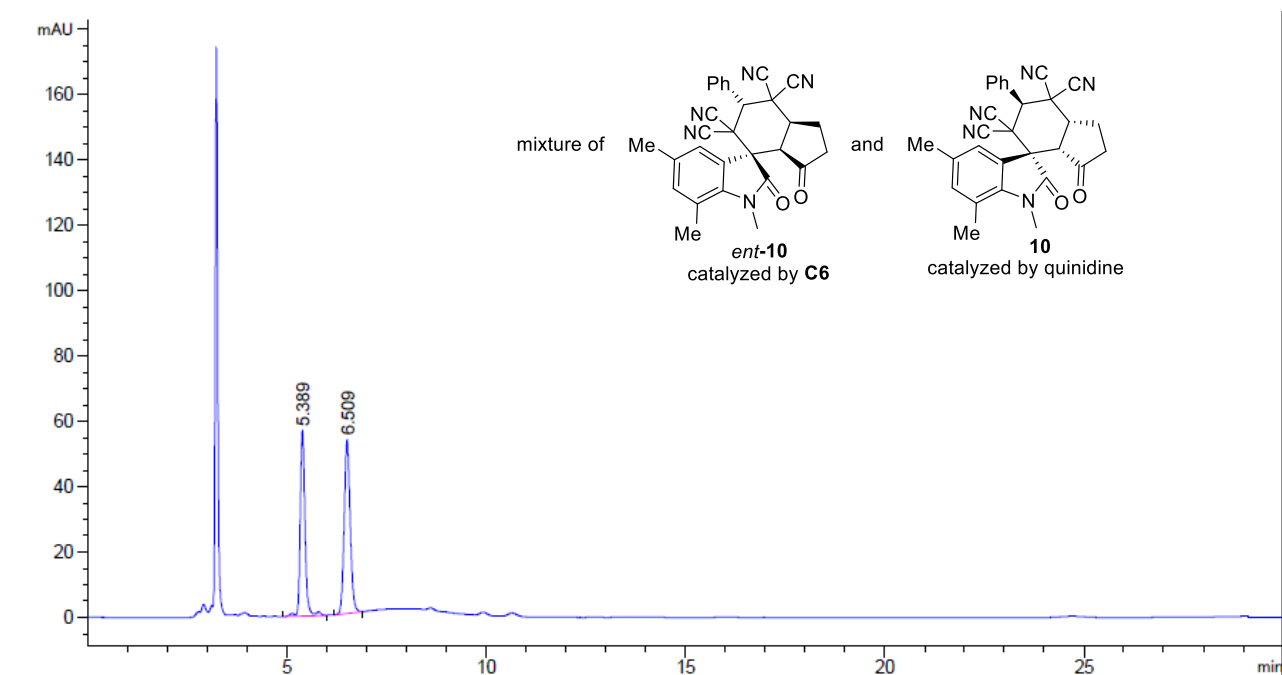

| Peak # | RetTime [min] | Type | Width [min] | Area mAU *s | Height [mAU] | Area %  |
|--------|---------------|------|-------------|-------------|--------------|---------|
| 1      | 5.389         | VV R | 0.1286      | 478.44125   | 56.59073     | 46.4262 |
| 2      | 6.509         | BB   | 0.1606      | 552.10089   | 52.96700     | 53.5738 |

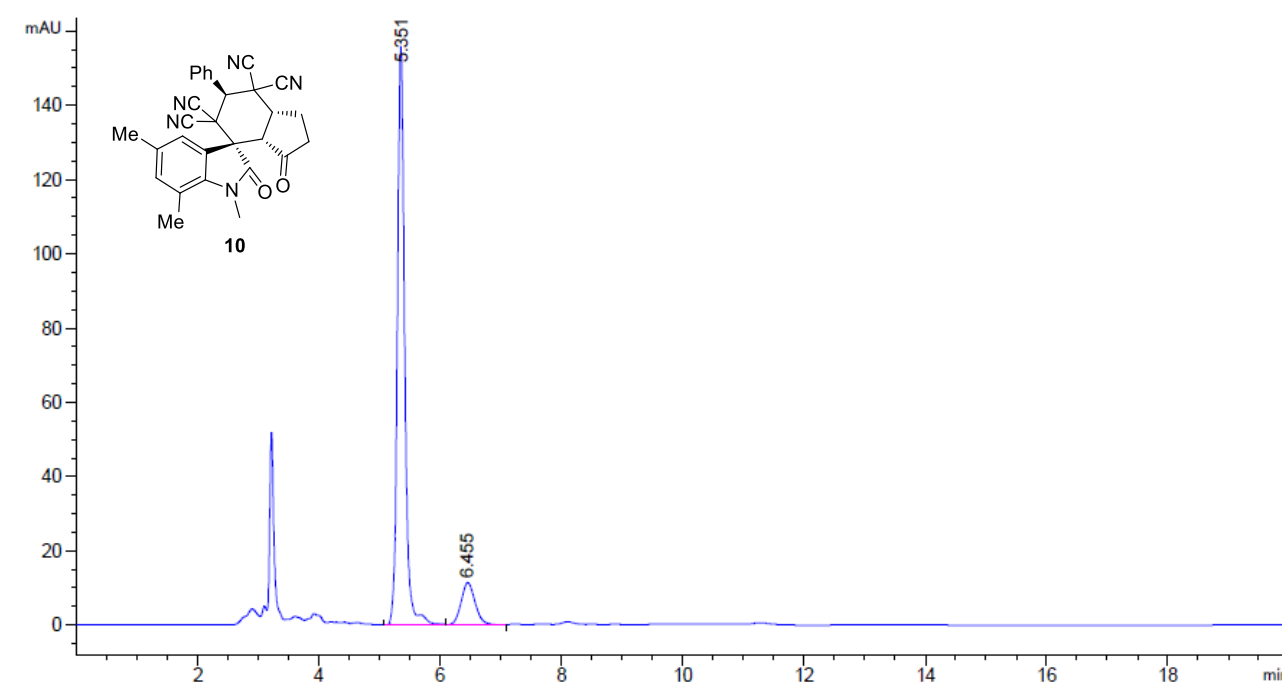

| Peak # | RetTime [min] | Type | Width [min] | Area mAU *s | Height [mAU] | Area %  |
|--------|---------------|------|-------------|-------------|--------------|---------|
| 1      | 5.351         | VV R | 0.1240      | 1334.30347  | 155.62289    | 94.4163 |
| 2      | 6.455         | BB   | 0.1609      | 78.94641    | 16.62692     | 5.5837  |

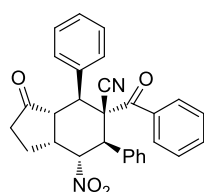

**12a**  
(400MHz, CDCl<sub>3</sub>)

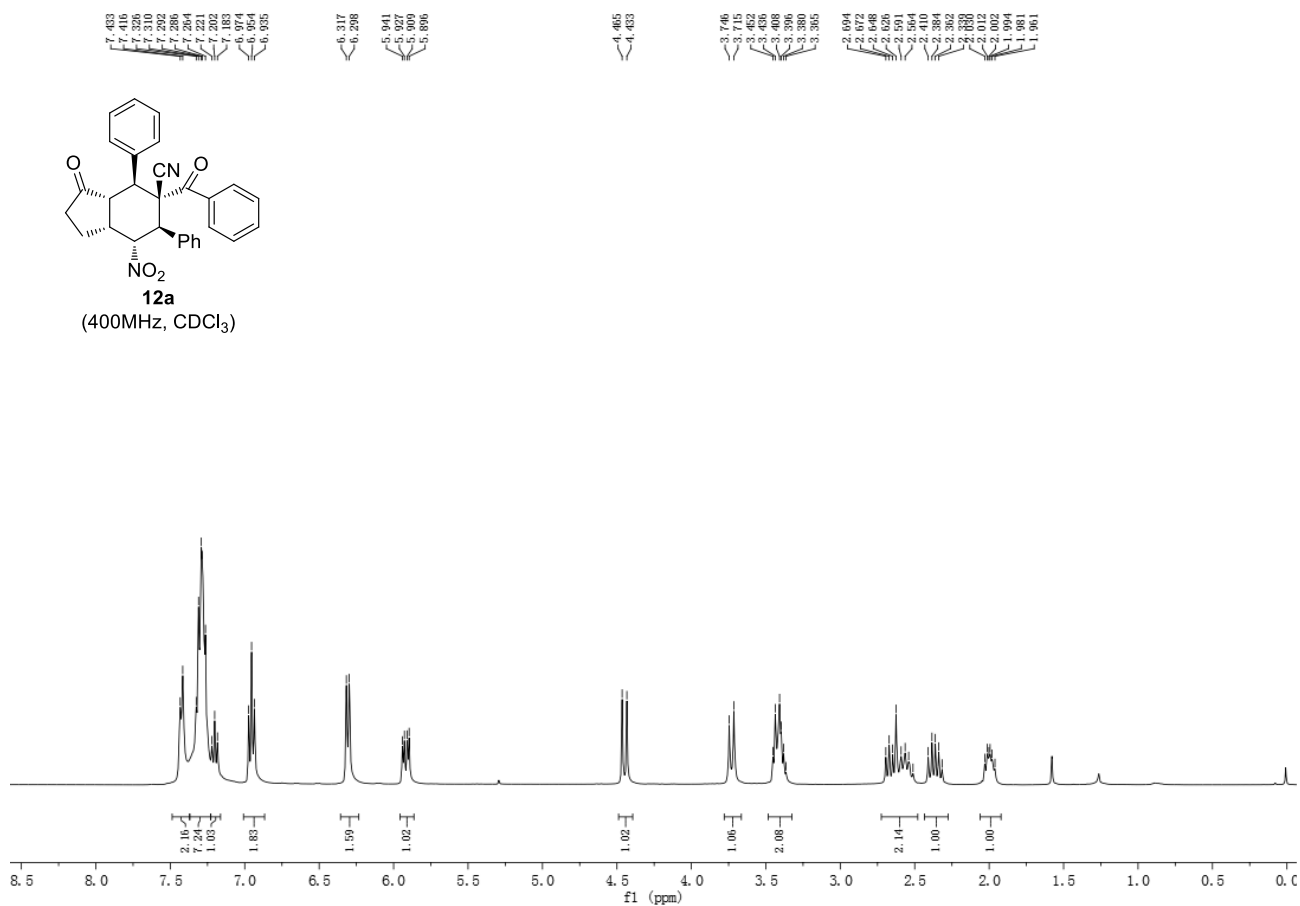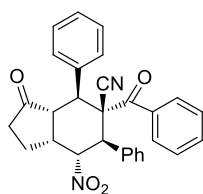

**12a**  
(100MHz, CDCl<sub>3</sub>)

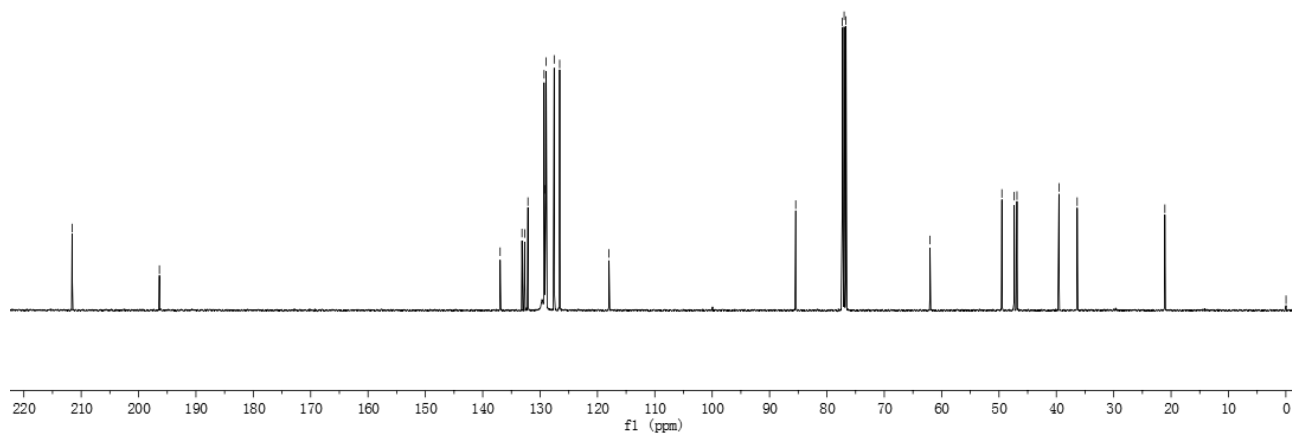

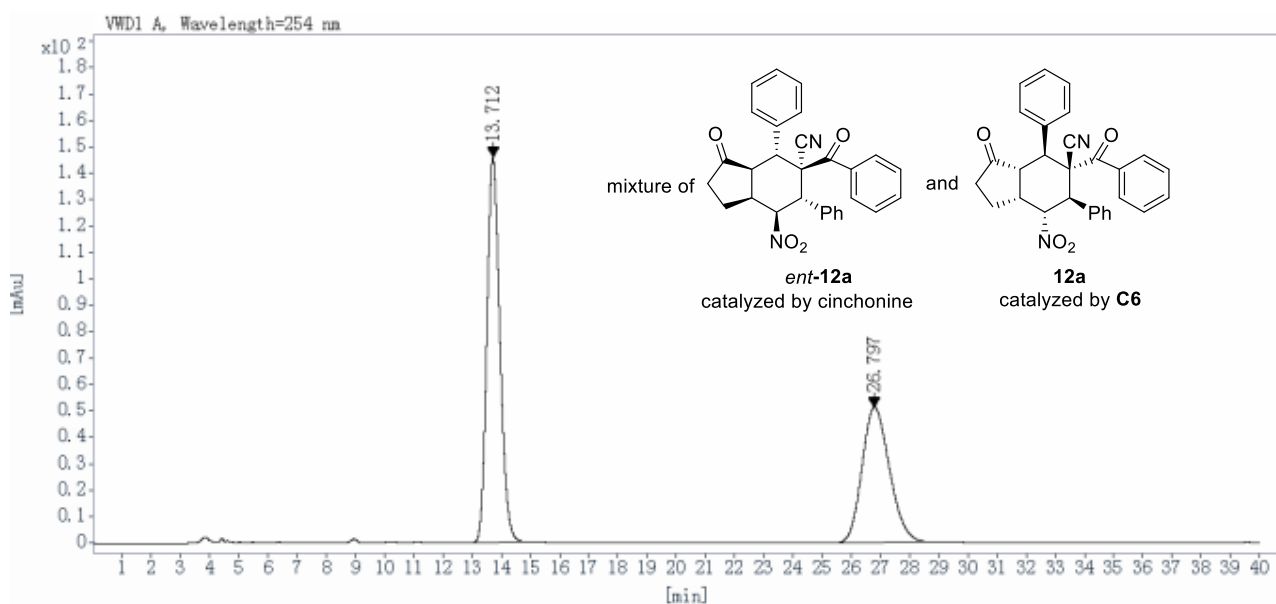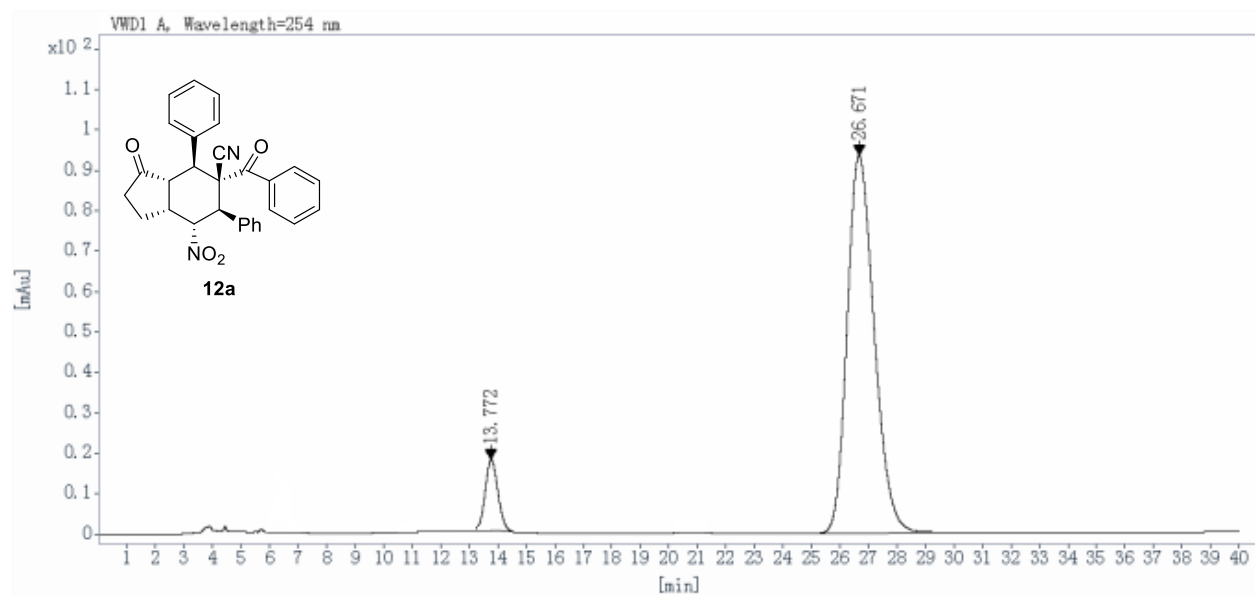

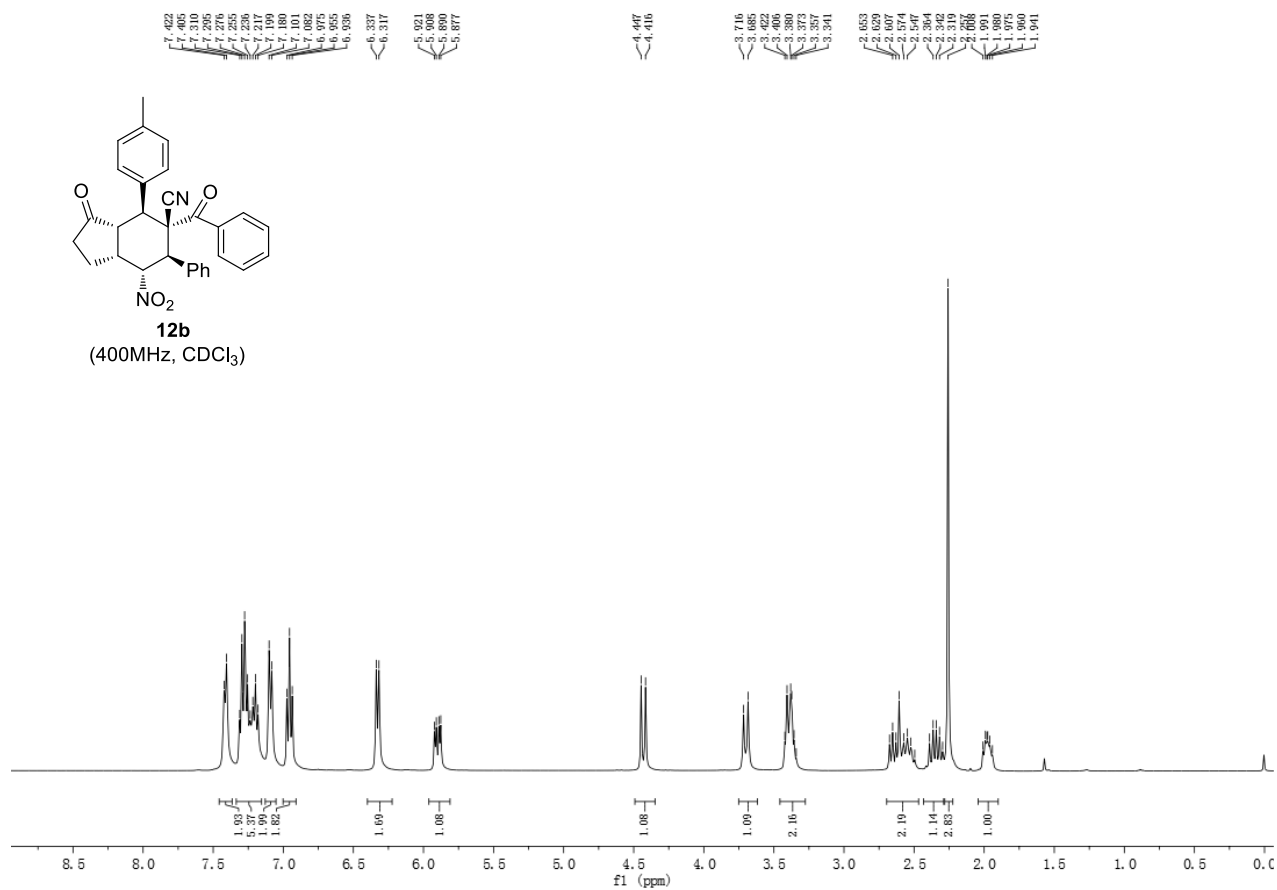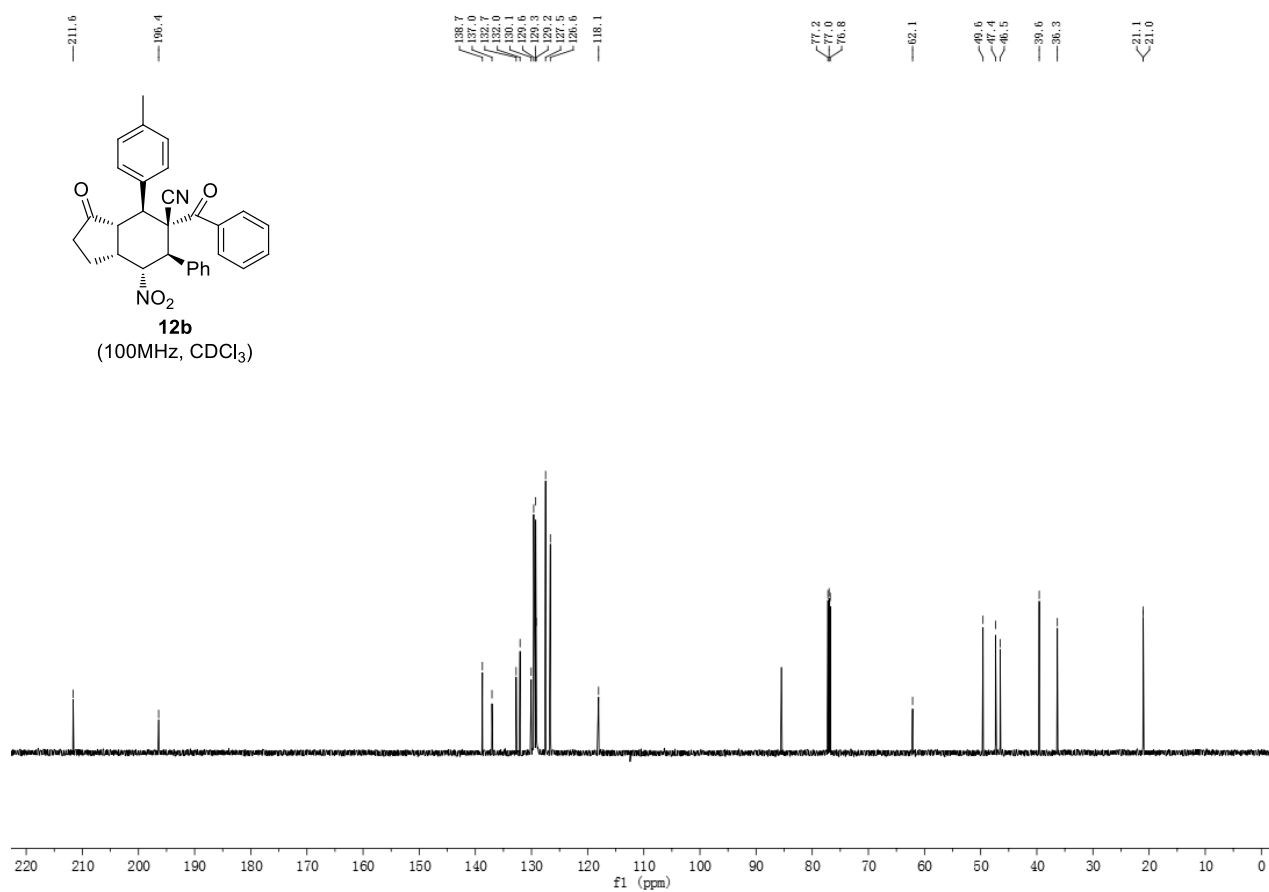

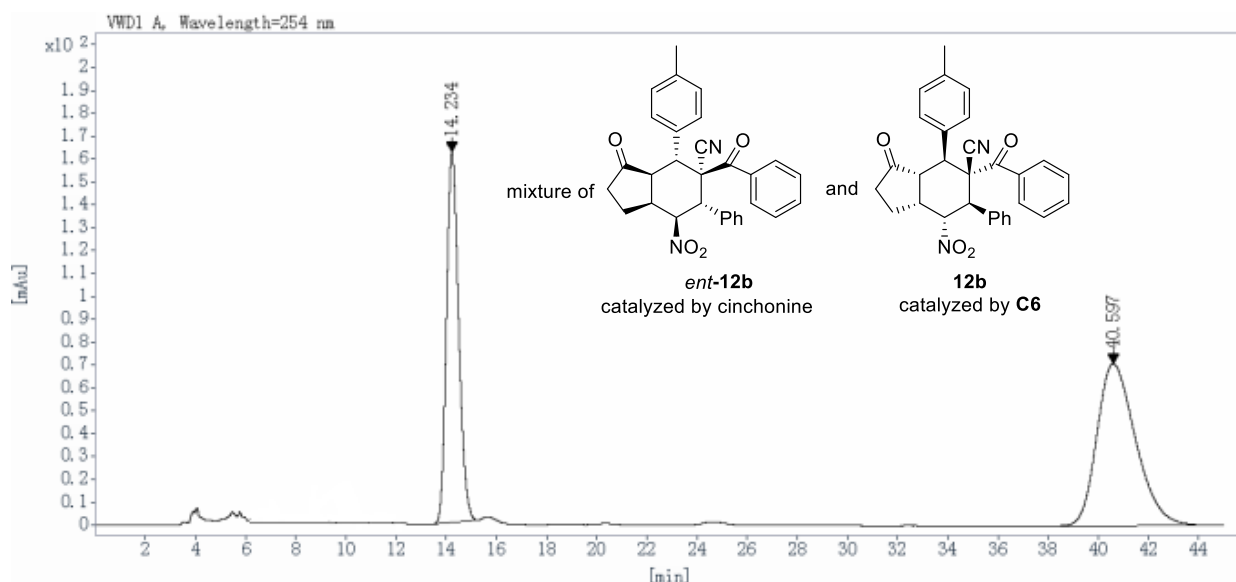

| Ret Time [min] | Peak Type | Width [min] | Height [mAU] | Area [mAU*s] | Area [%] |
|----------------|-----------|-------------|--------------|--------------|----------|
| 14.234         | BB        | 0.52        | 161.8310     | 5458.3267    | 41.7577  |
| 40.597         | BBA       | 1.64        | 70.7844      | 7613.1099    | 58.2423  |
| Totals:        |           |             |              | 13071.4365   | 100.0000 |

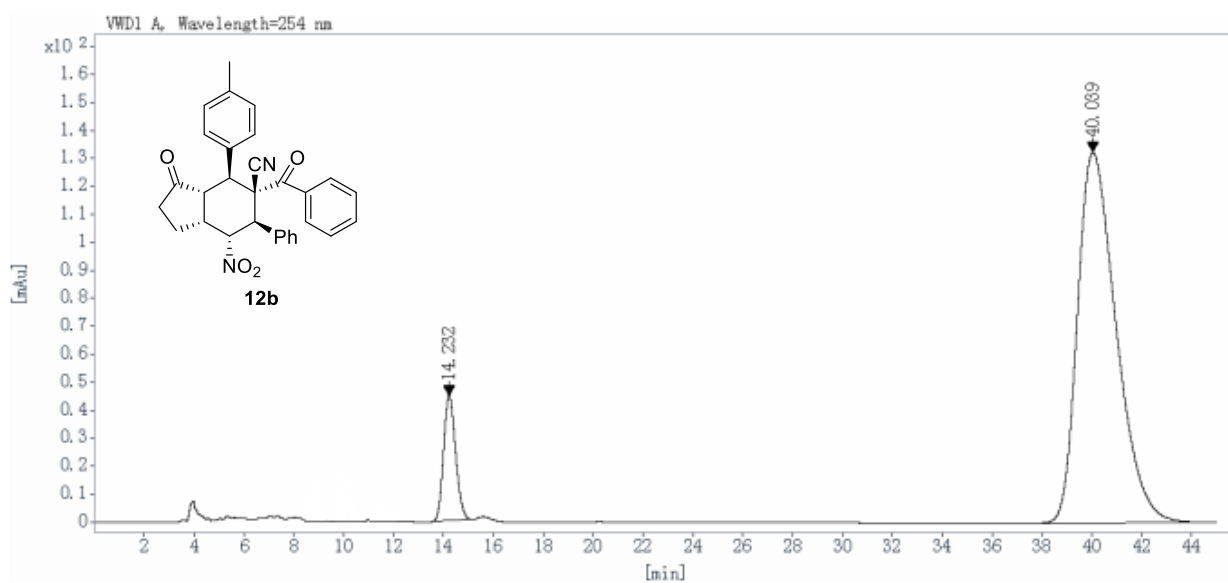

| Ret Time [min] | Peak Type | Width [min] | Height [mAU] | Area [mAU*s] | Area [%] |
|----------------|-----------|-------------|--------------|--------------|----------|
| 14.232         | BBA       | 0.52        | 44.5588      | 1479.1577    | 9.4187   |
| 40.039         | BBA       | 1.64        | 132.3924     | 14225.2979   | 90.5813  |
| Totals:        |           |             |              | 15704.4556   | 100.0000 |



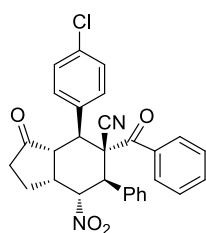

**12c**  
(400MHz,  $\text{CDCl}_3$ )

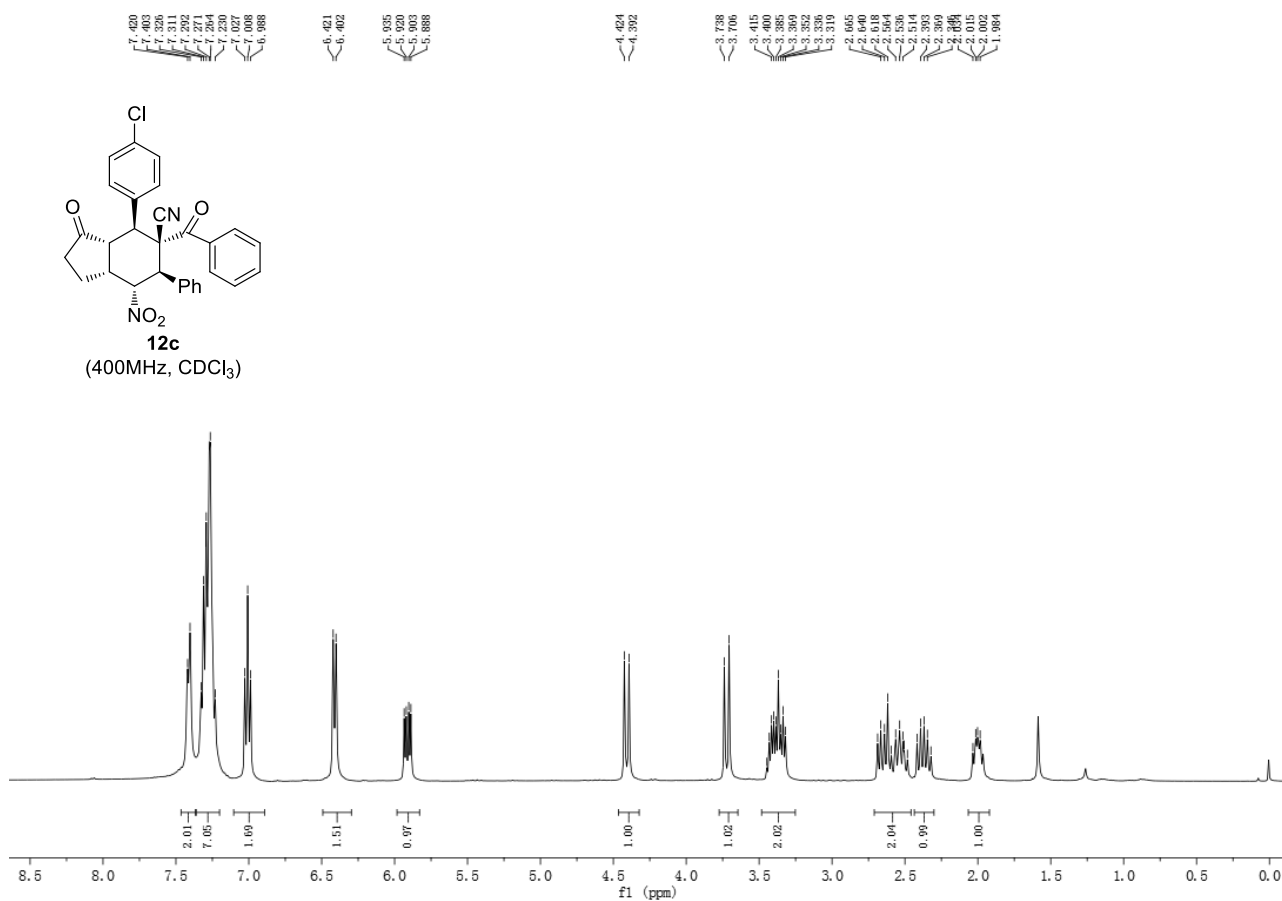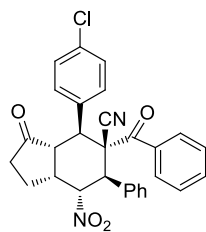

**12c**  
(100MHz,  $\text{CDCl}_3$ )

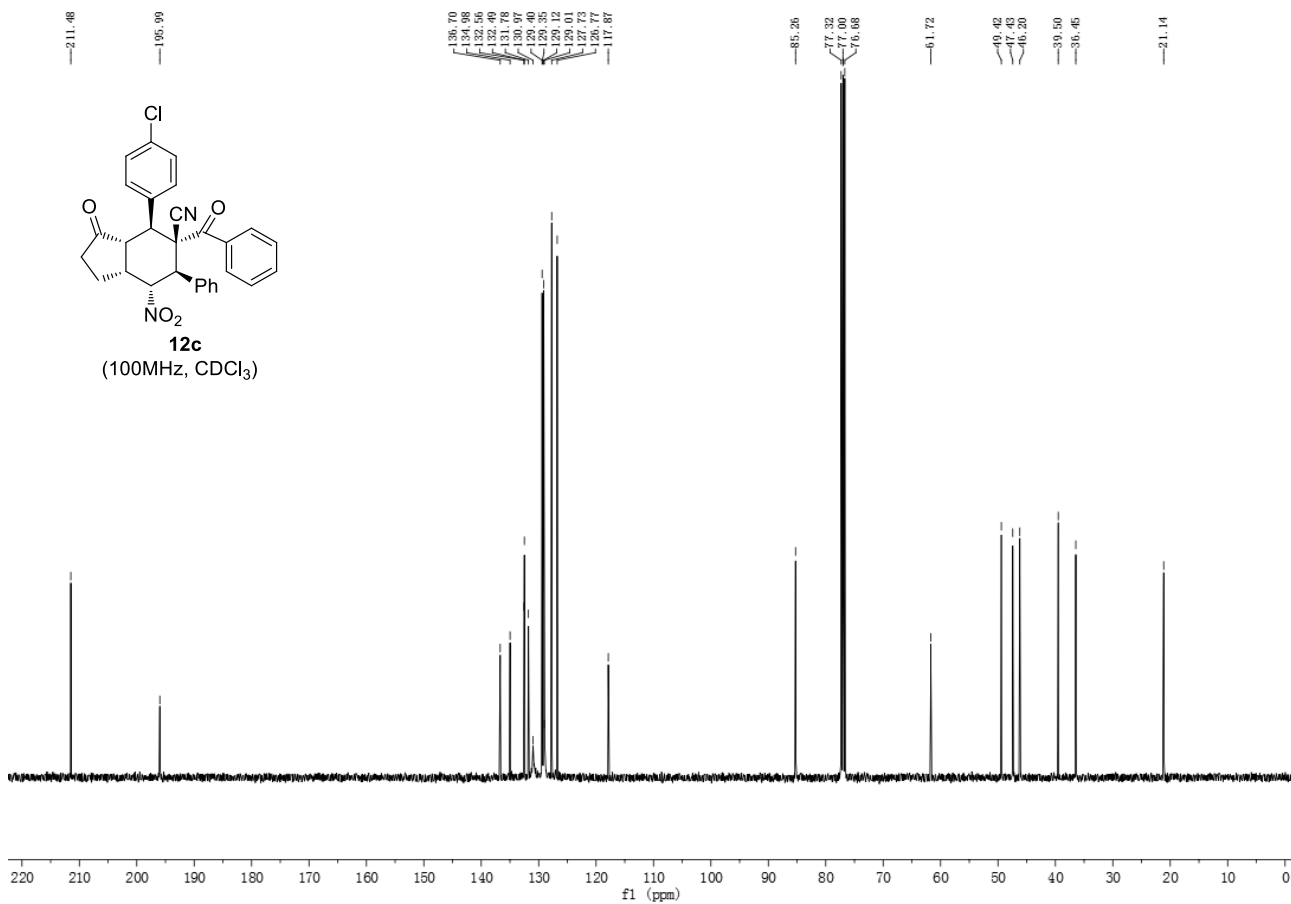

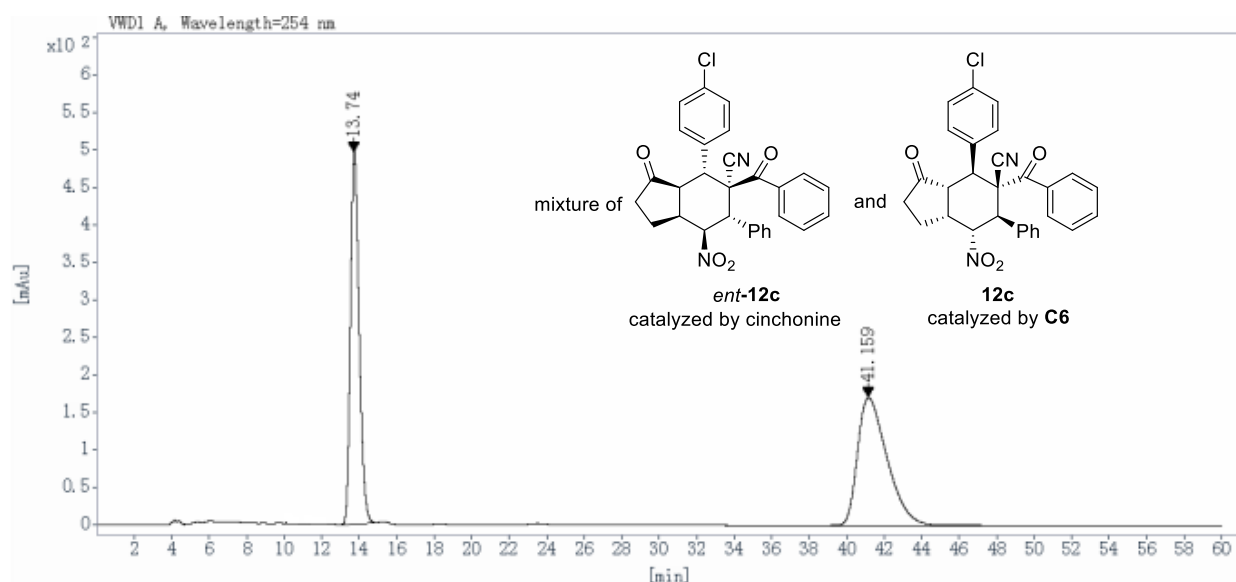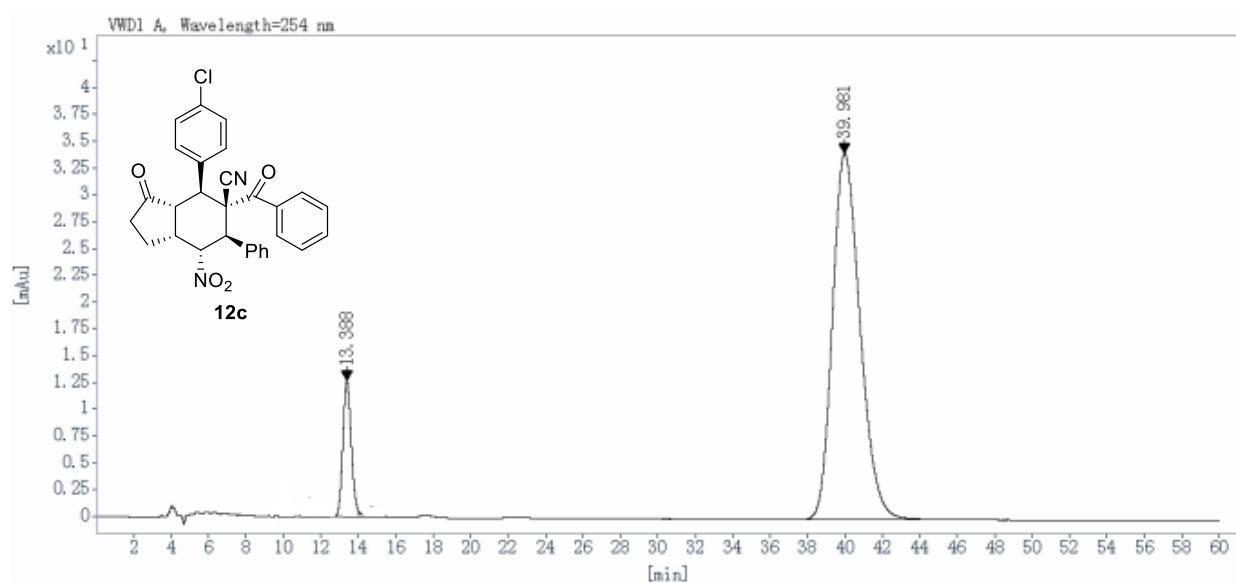

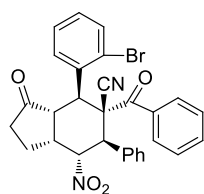

**12d**  
(400MHz, CDCl<sub>3</sub>)

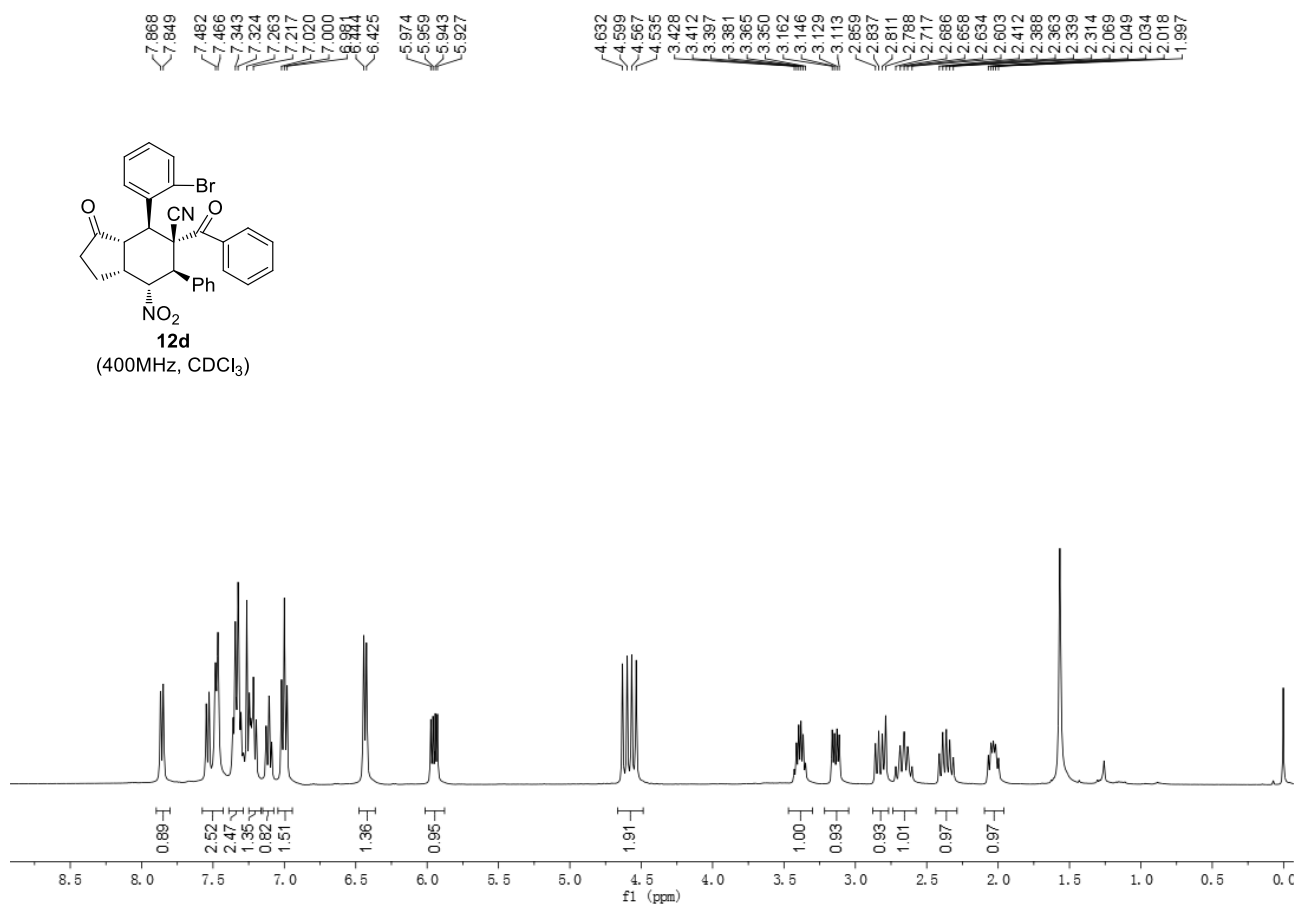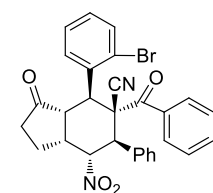

**12d**  
(100MHz, CDCl<sub>3</sub>)

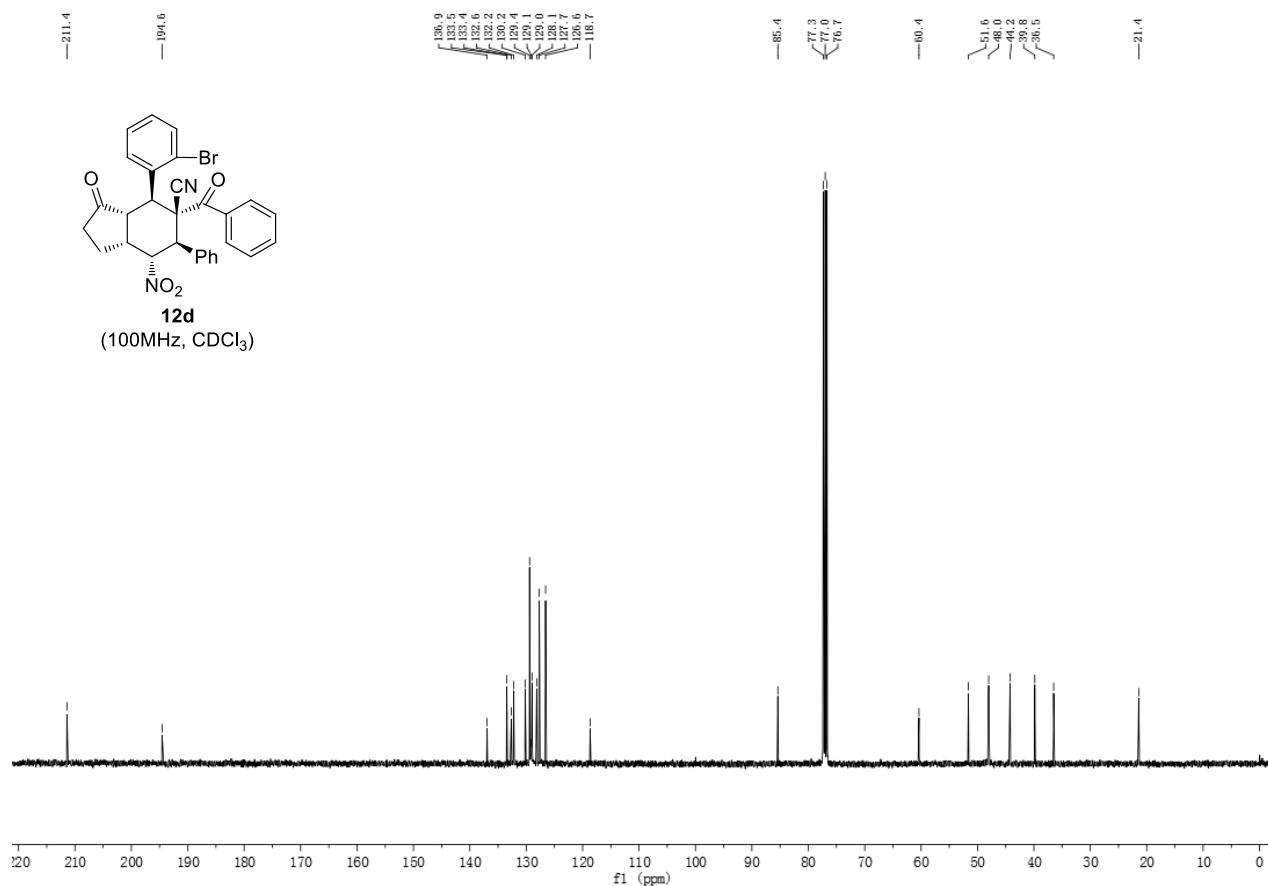

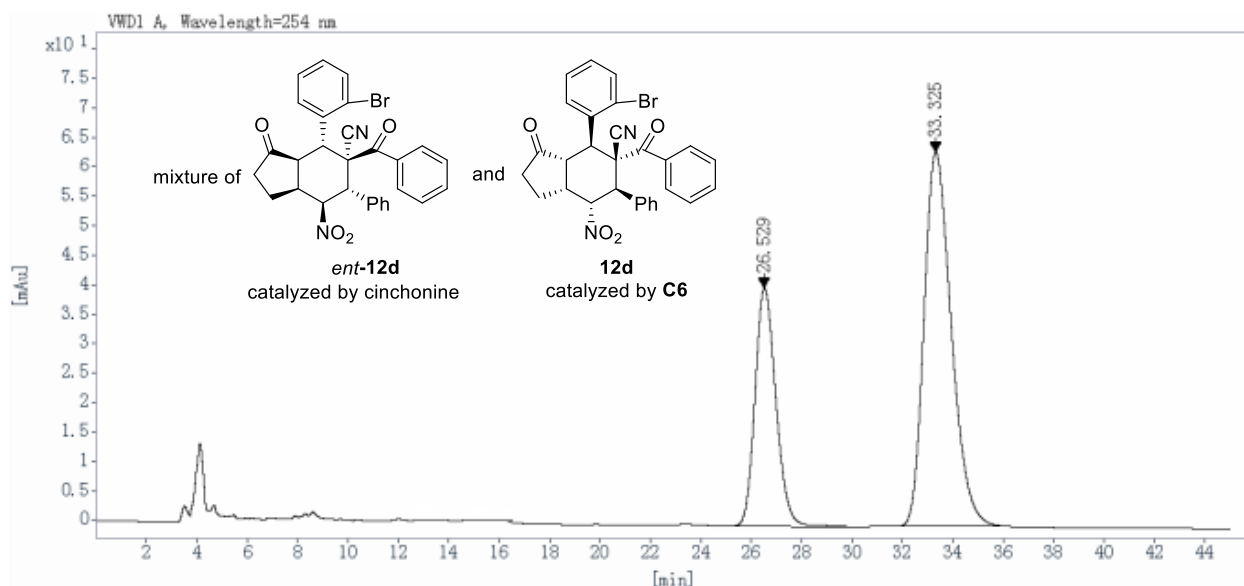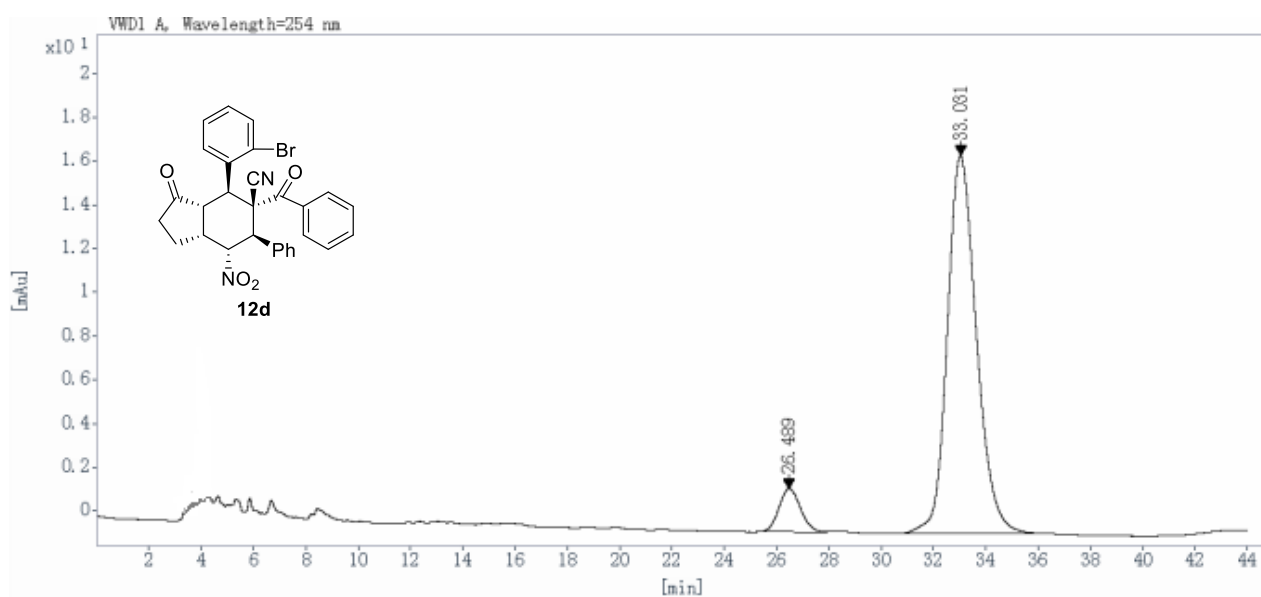

7.426  
7.410  
7.394  
7.374  
7.336  
7.321  
7.302  
7.282  
7.263  
7.247  
7.228  
7.176  
7.156  
7.030  
7.011  
6.989  
6.440  
5.939  
5.924  
5.907  
5.883  
4.424  
4.392  
3.696  
3.663  
3.431  
3.416  
3.400  
3.365  
3.370  
3.354  
3.338  
3.322  
2.680  
2.655  
2.633  
2.625  
2.399  
2.374  
2.055  
2.016  
2.002  
1.985  
1.966

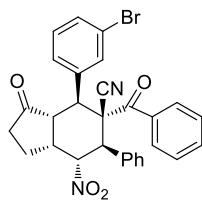

**12e**

(400MHz, CDCl<sub>3</sub>)

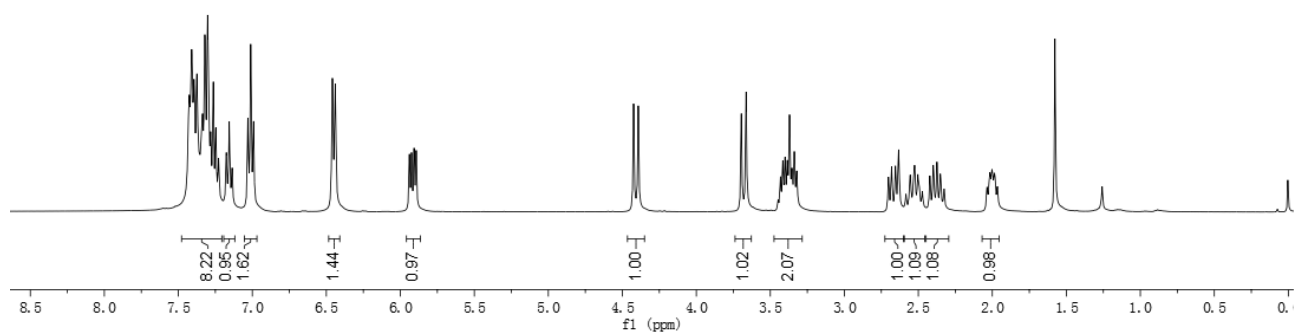

211.3  
195.9  
136.7  
135.5  
132.5  
132.1  
130.3  
129.4  
128.4  
127.7  
126.9  
122.8  
117.8  
86.2  
77.3  
77.0  
76.7  
61.7  
46.2  
46.4  
39.5  
36.5  
21.1

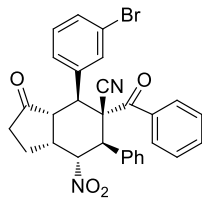

**12e**

(100MHz, CDCl<sub>3</sub>)

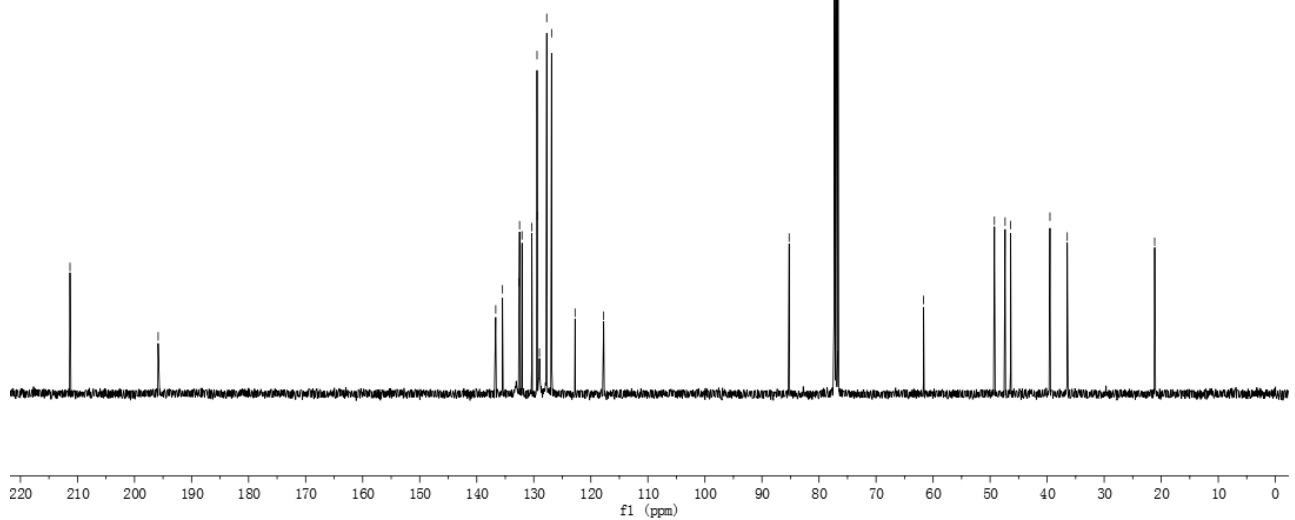

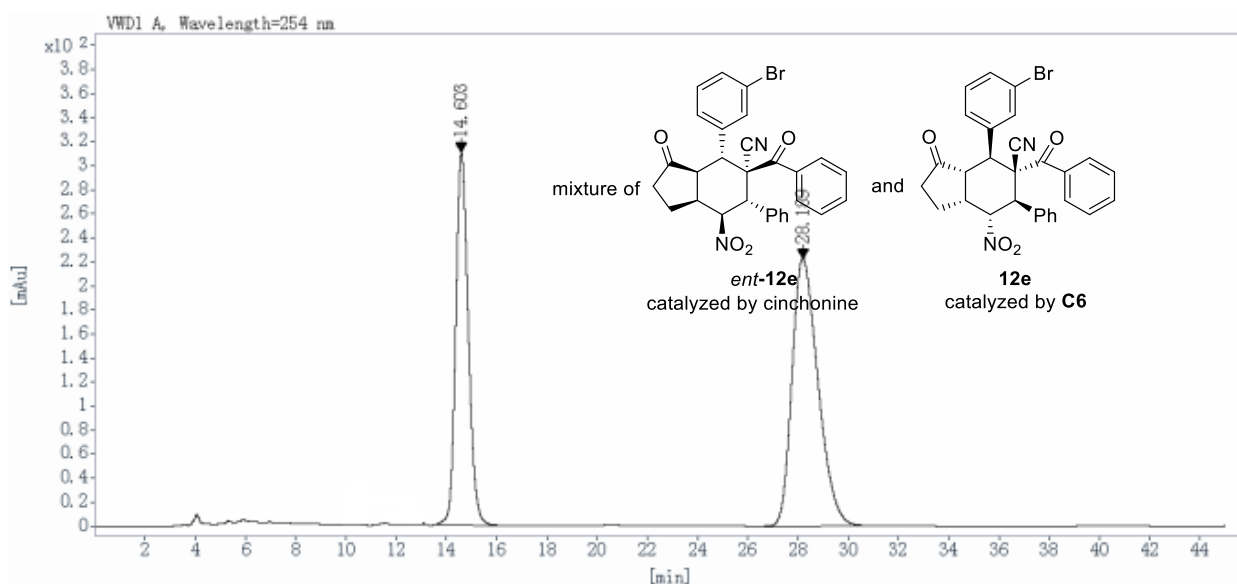

| Ret Time [min] | Peak Type | Width [min] | Height [mAU] | Area [mAU*s] | Area [%] |
|----------------|-----------|-------------|--------------|--------------|----------|
| 14.603         | BB        | 0.53        | 309.4417     | 10716.9961   | 40.0750  |
| 28.189         | BB        | 1.11        | 222.6176     | 16025.3486   | 59.9250  |
| Totals:        |           |             |              | 26742.3447   | 100.0000 |

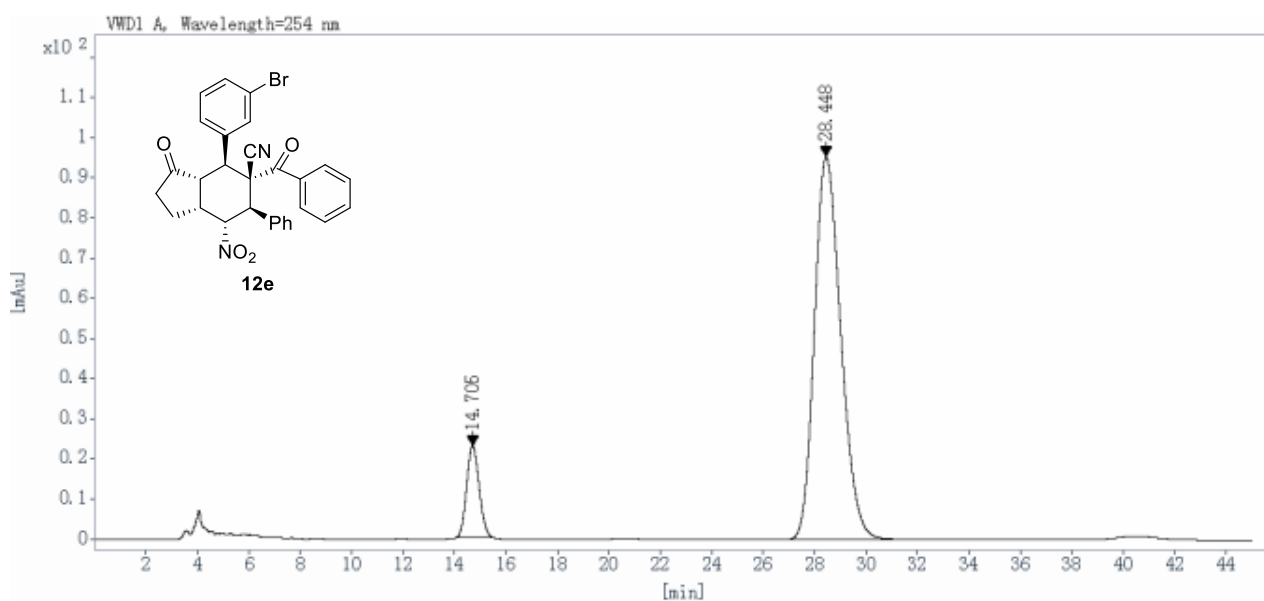

| Ret Time [min] | Peak Type | Width [min] | Height [mAU] | Area [mAU*s] | Area [%] |
|----------------|-----------|-------------|--------------|--------------|----------|
| 14.705         | BBA       | 0.53        | 22.8103      | 768.6624     | 10.1246  |
| 28.448         | BB        | 1.11        | 95.3737      | 6823.3579    | 89.8754  |
| Totals:        |           |             |              | 7592.0203    | 100.0000 |

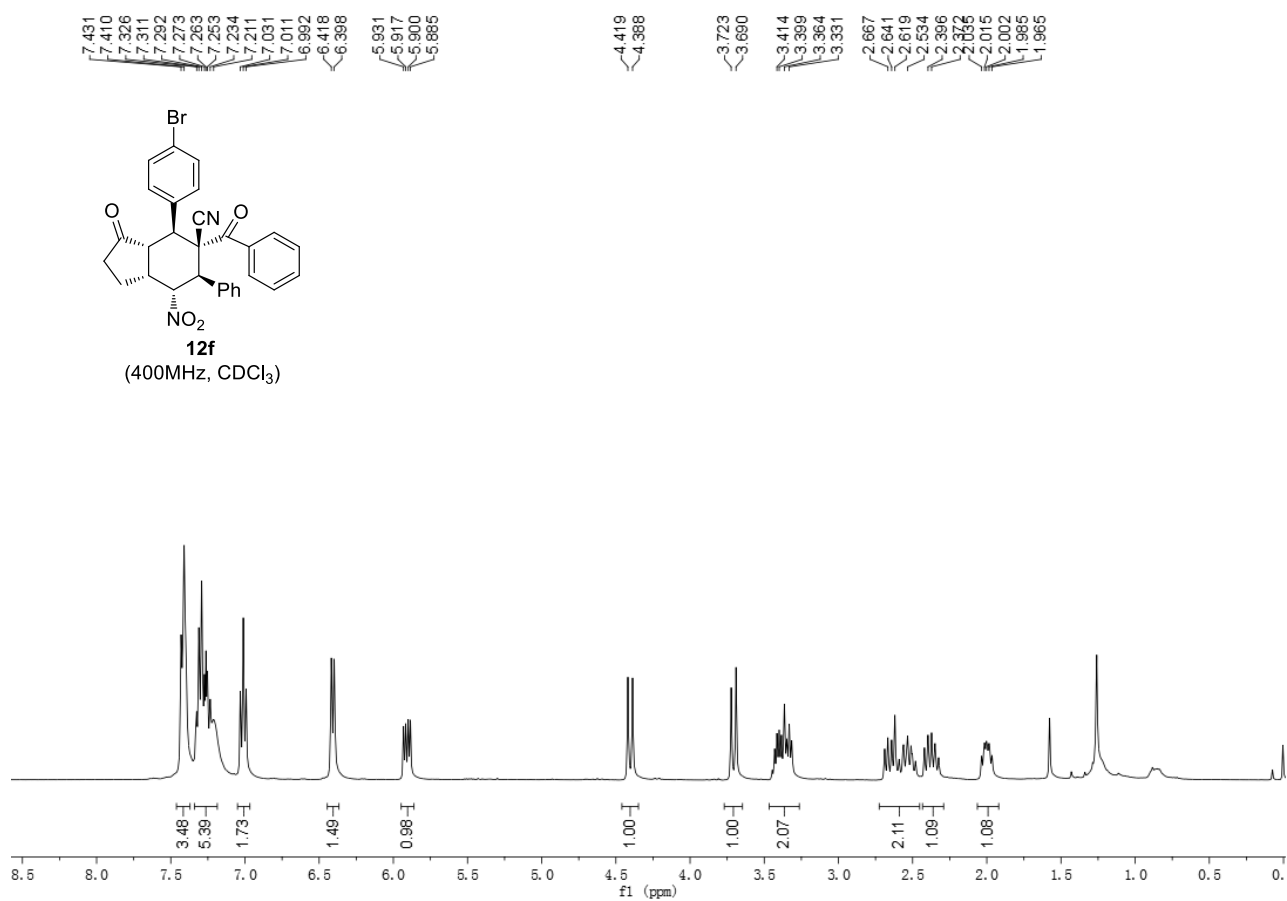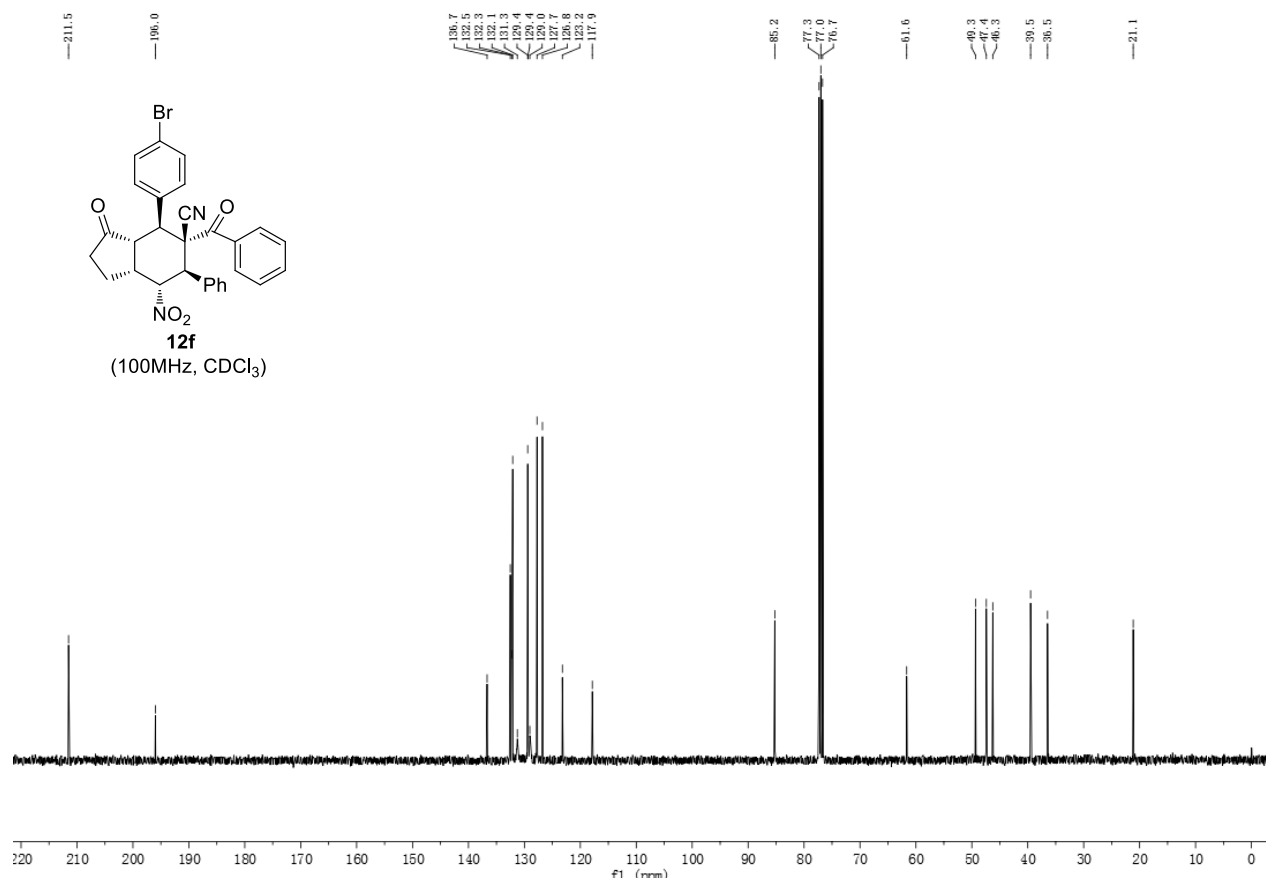

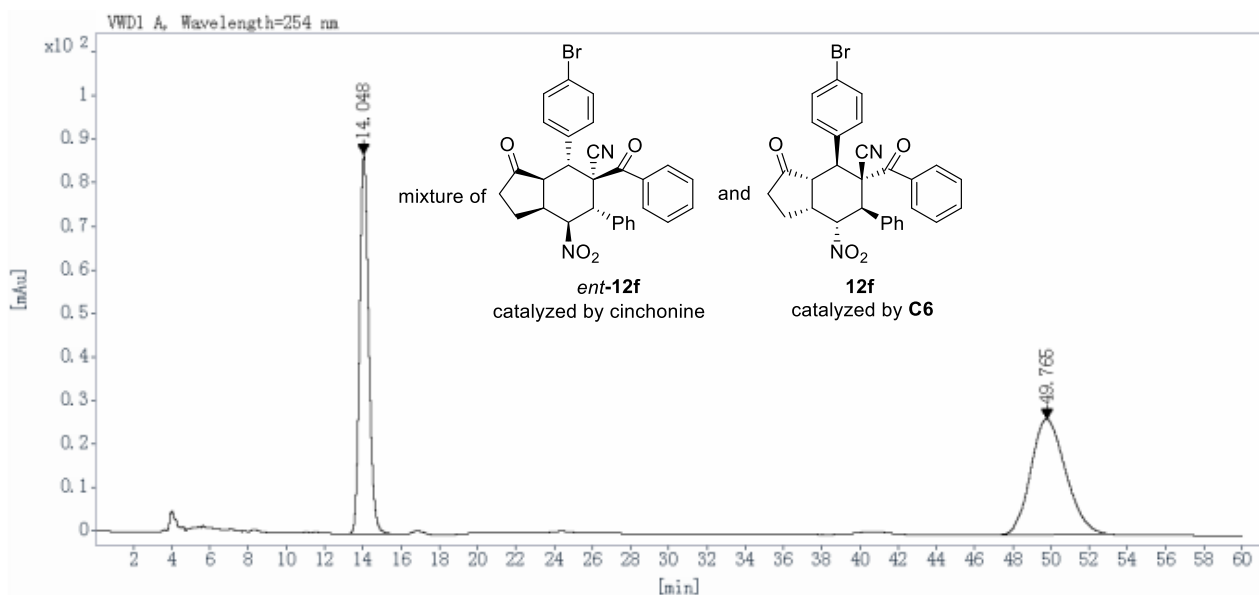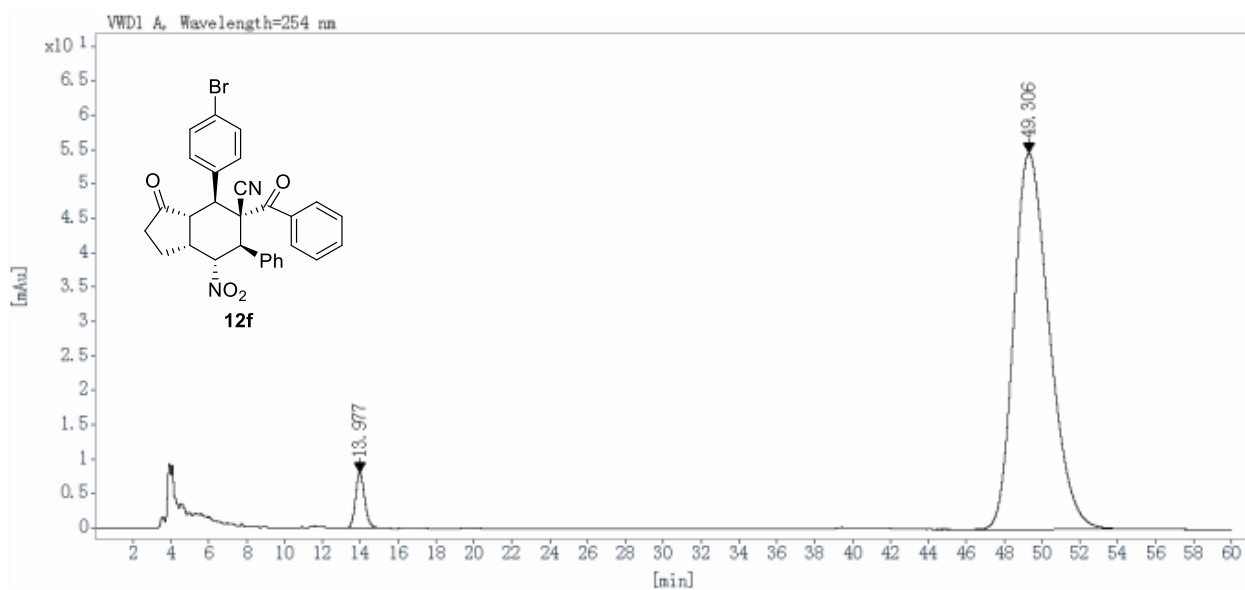



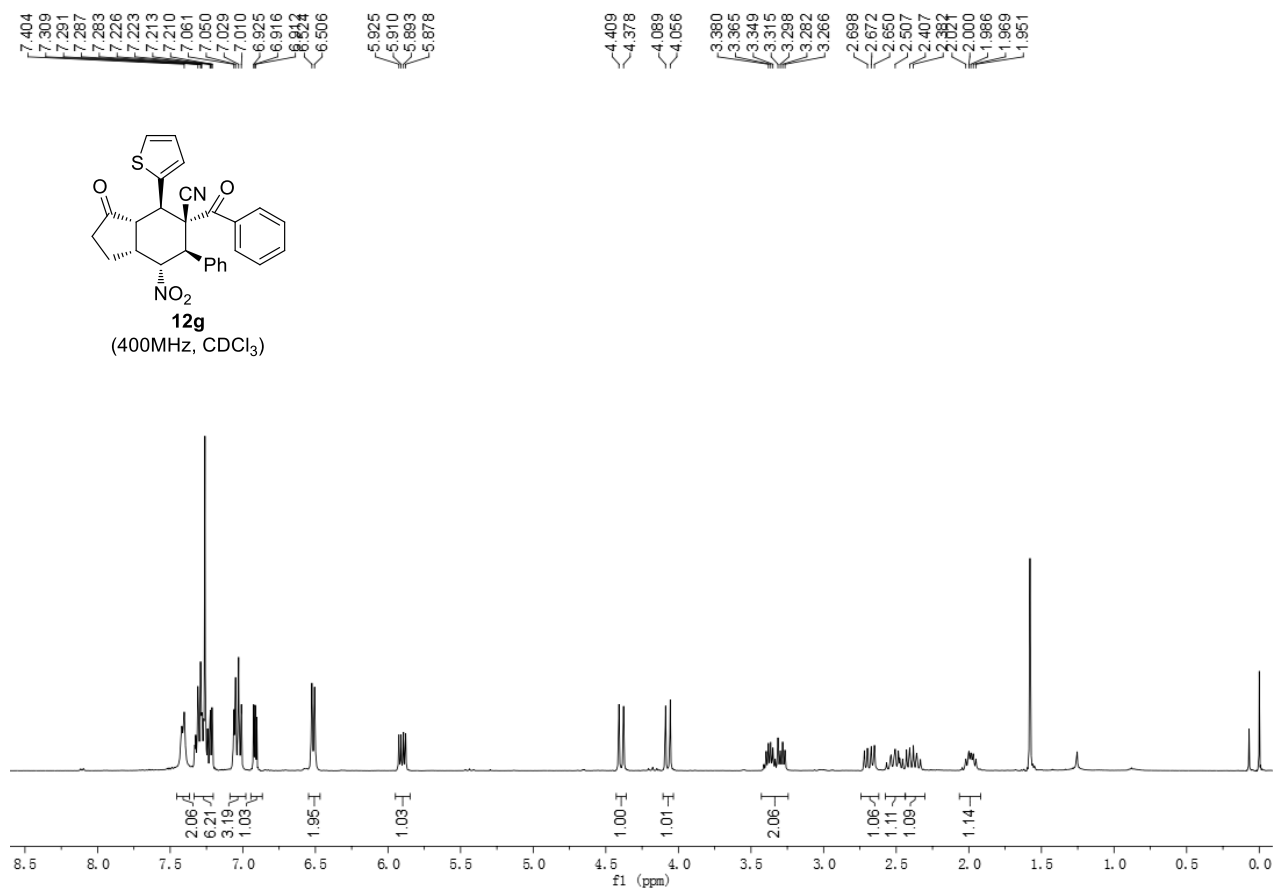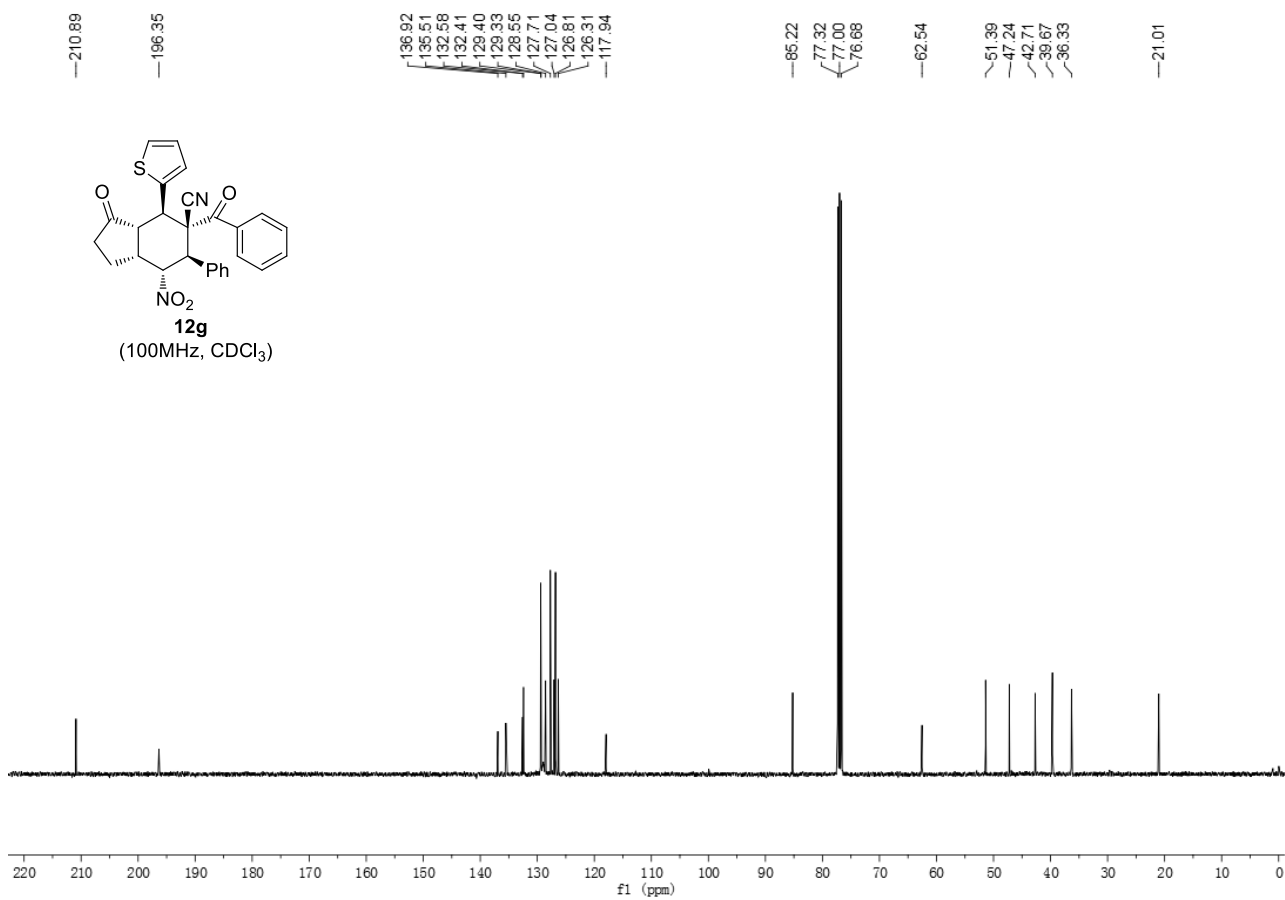

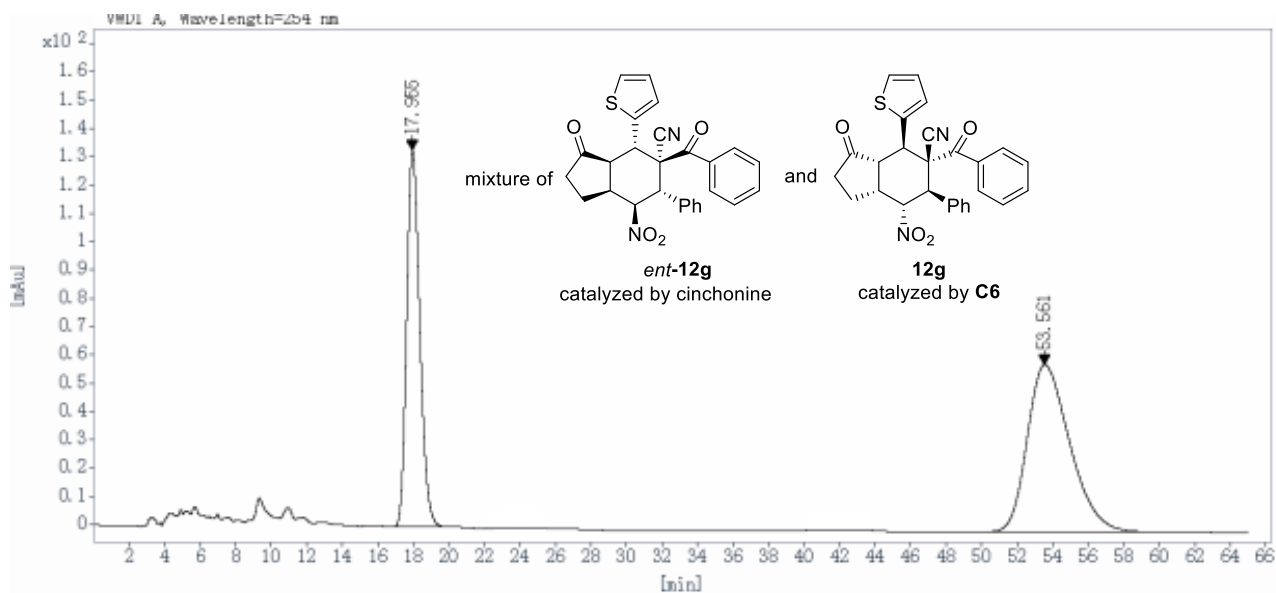

| Ret Time [min] | Peak Type | Width [min] | Height [mAU] | Area [mAU*s] | Area [%] |
|----------------|-----------|-------------|--------------|--------------|----------|
| 17.955         | BB        | 0.79        | 133.0663     | 6816.8457    | 40.9767  |
| 53.561         | BB        | 2.45        | 59.0161      | 9819.0713    | 59.0233  |
| Totals:        |           |             |              | 16635.9170   | 100.0000 |

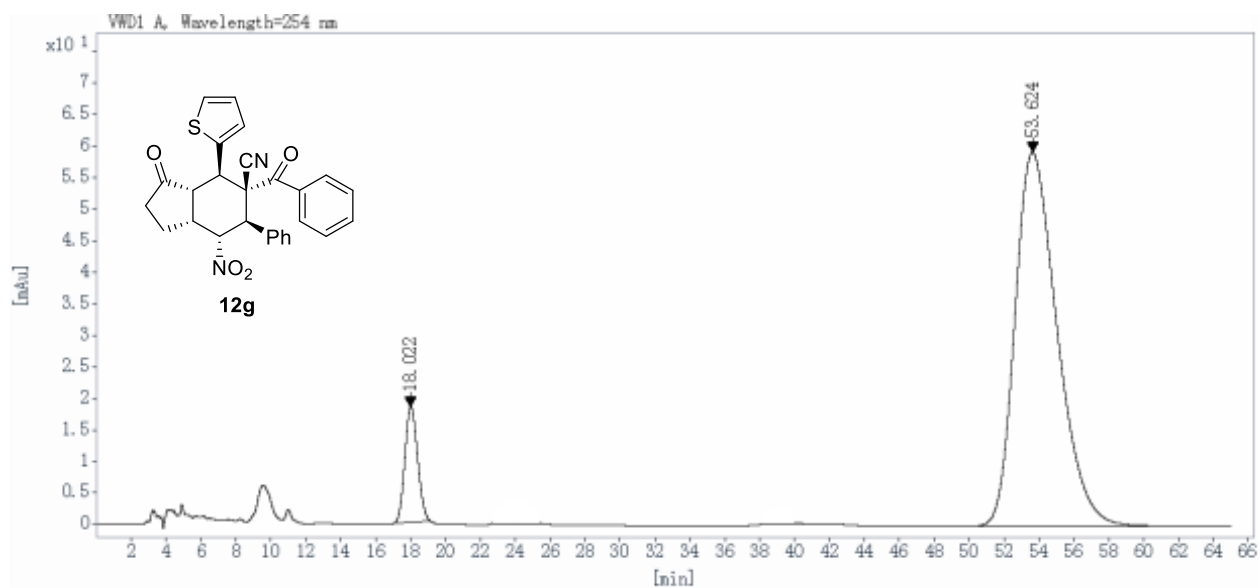

| Ret Time [min] | Peak Type | Width [min] | Height [mAU] | Area [mAU*s] | Area [%] |
|----------------|-----------|-------------|--------------|--------------|----------|
| 18.022         | BBA       | 0.78        | 18.3559      | 926.4836     | 8.5706   |
| 53.624         | BB        | 2.44        | 59.1773      | 9883.5273    | 91.4294  |
| Totals:        |           |             |              | 10810.0110   | 100.0000 |

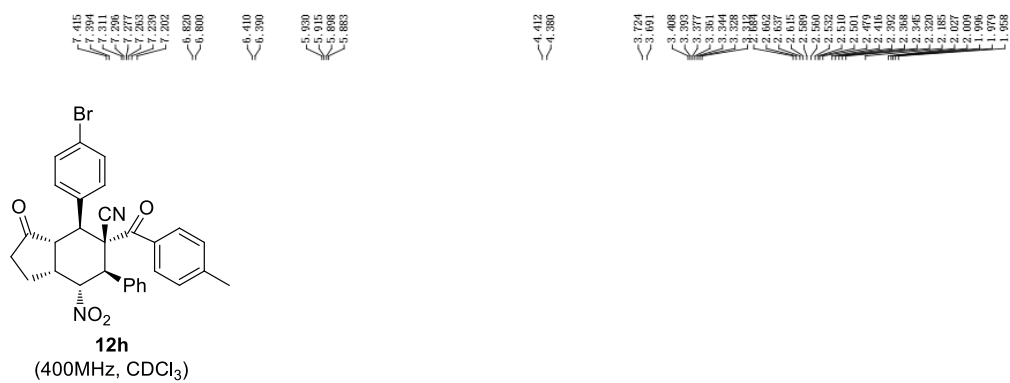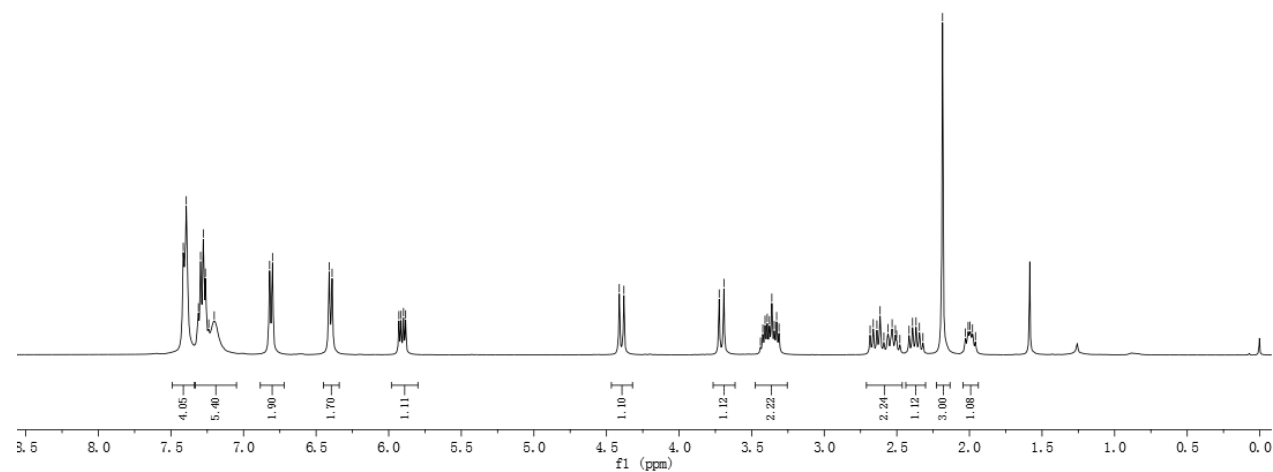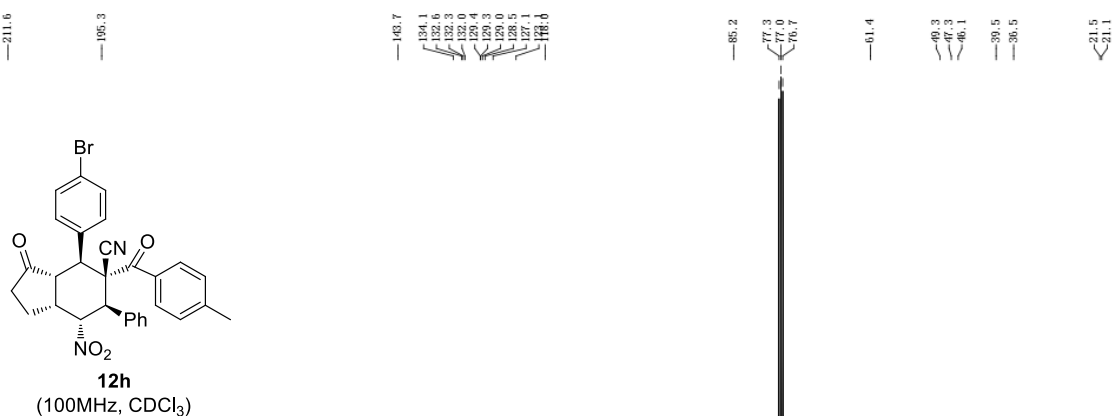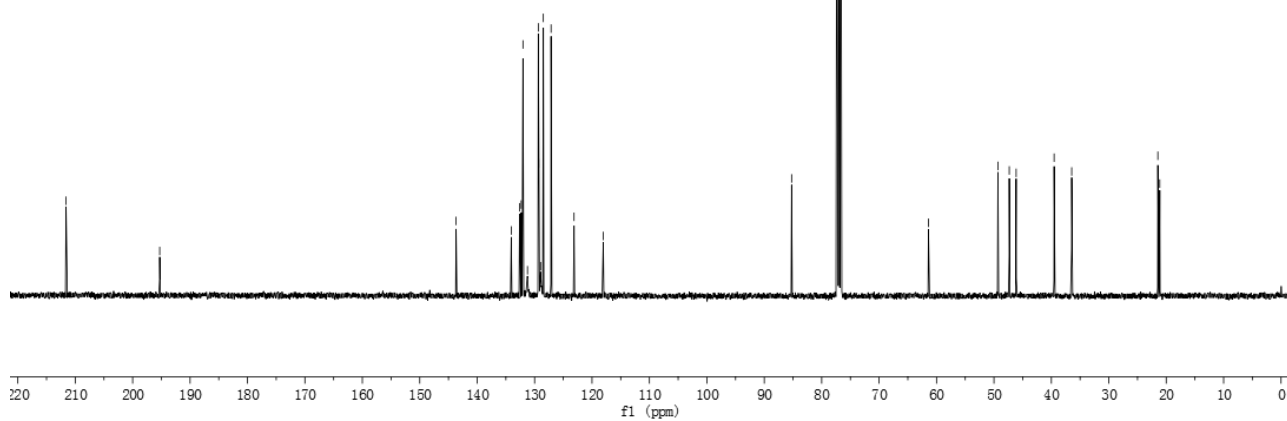

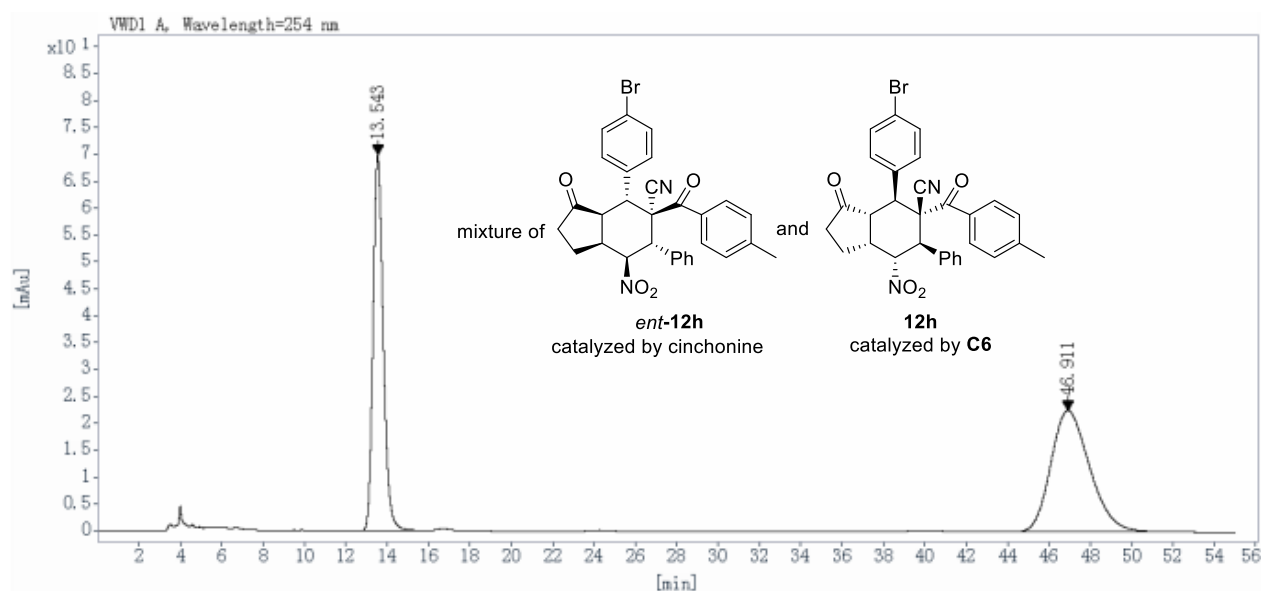

| Ret Time [min] | Peak Type | Width [min] | Height [mAU] | Area [mAU*s] | Area [%] |
|----------------|-----------|-------------|--------------|--------------|----------|
| 13.543         | BB        | 0.53        | 69.7607      | 2395.4045    | 45.0591  |
| 46.911         | BB        | 1.81        | 22.4417      | 2920.7400    | 54.9409  |
| Totals:        |           |             |              | 5316.1445    | 100.0000 |

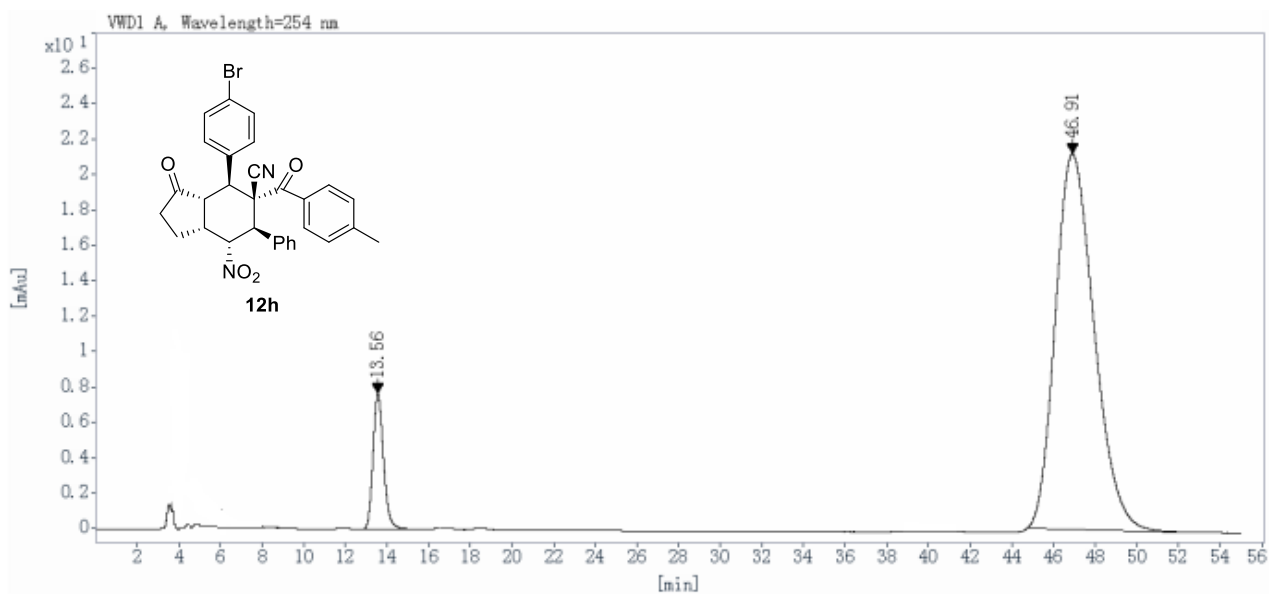

| Ret Time [min] | Peak Type | Width [min] | Height [mAU] | Area [mAU*s] | Area [%] |
|----------------|-----------|-------------|--------------|--------------|----------|
| 13.560         | BB        | 0.54        | 7.6879       | 269.0080     | 8.9206   |
| 46.910         | BB        | 1.79        | 21.1874      | 2746.5793    | 91.0794  |
| Totals:        |           |             |              | 3015.5874    | 100.0000 |

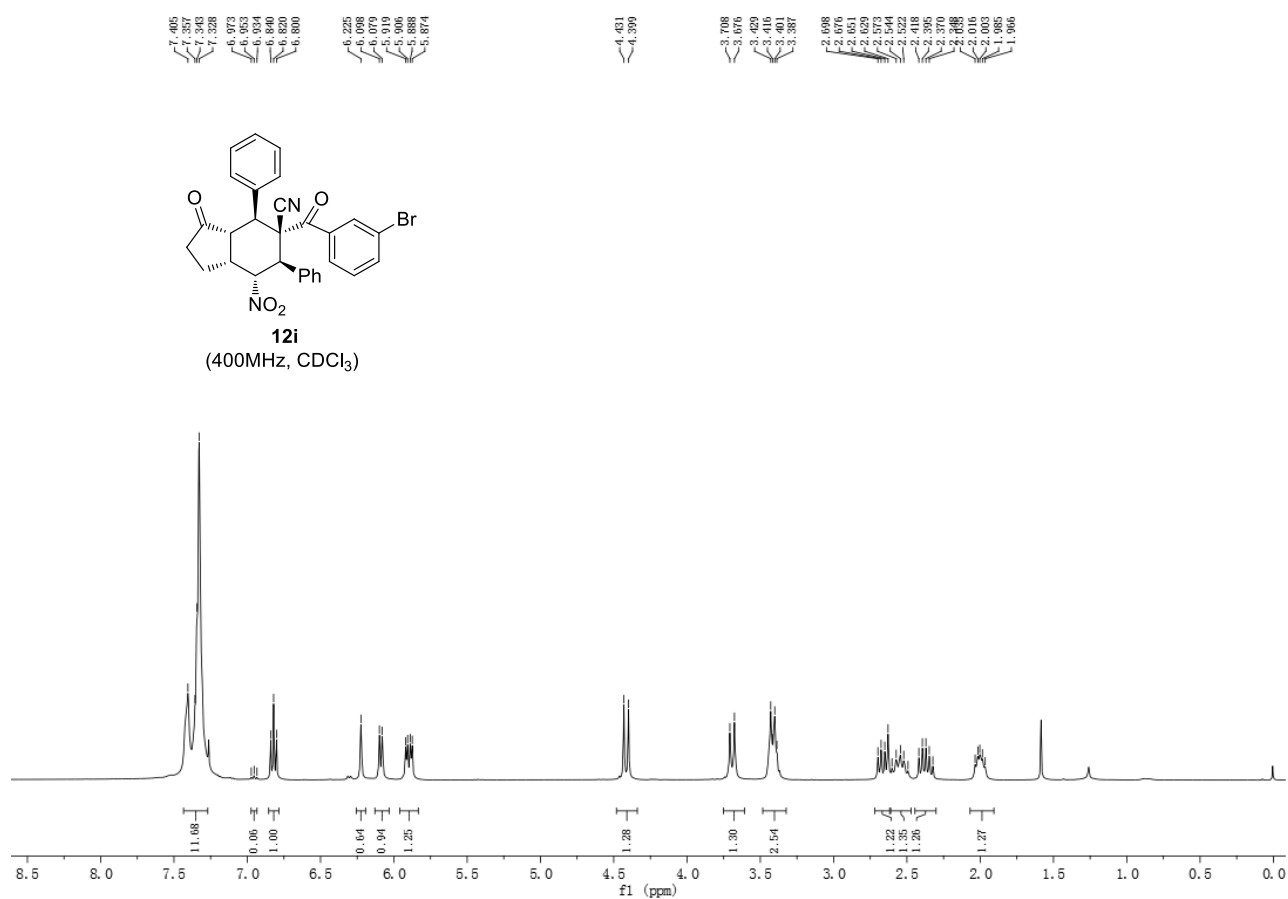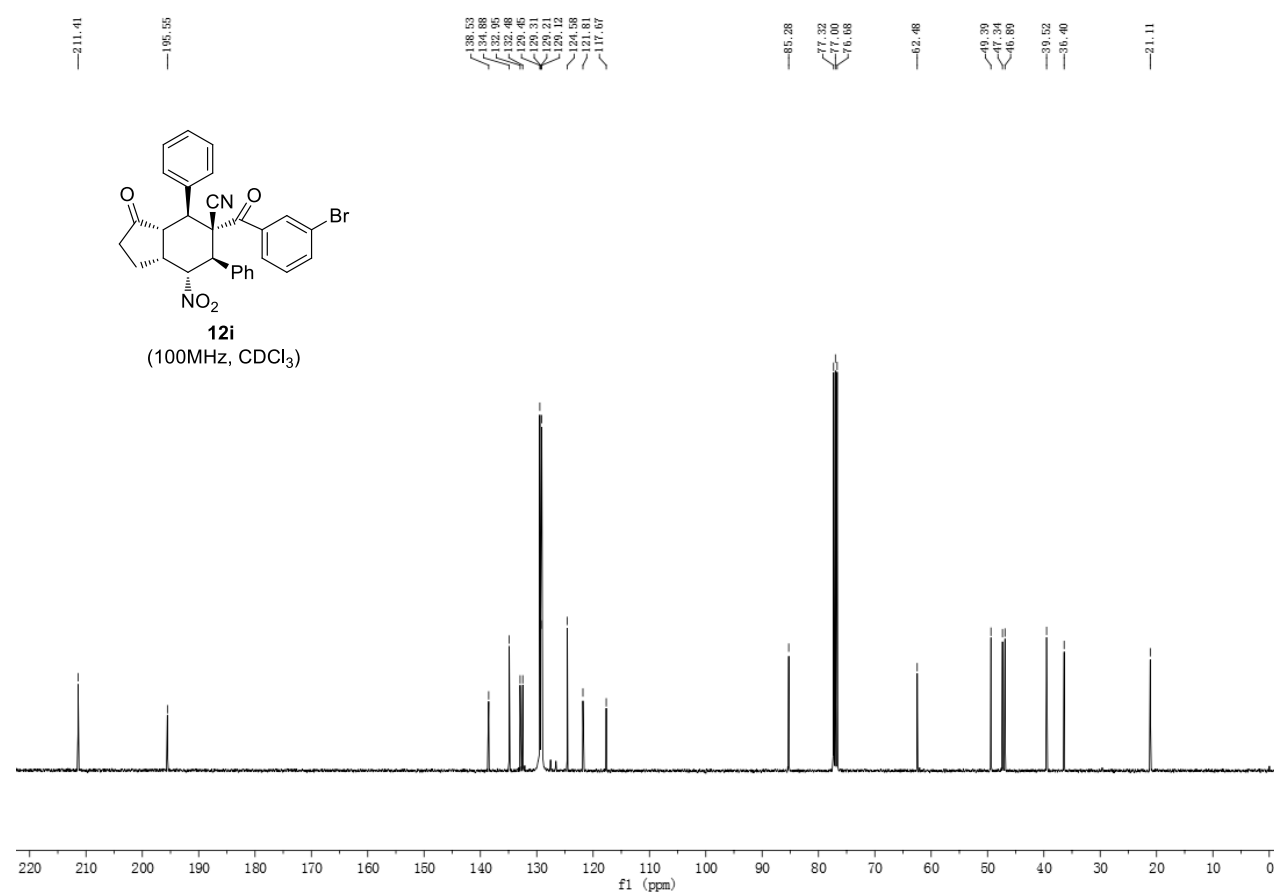

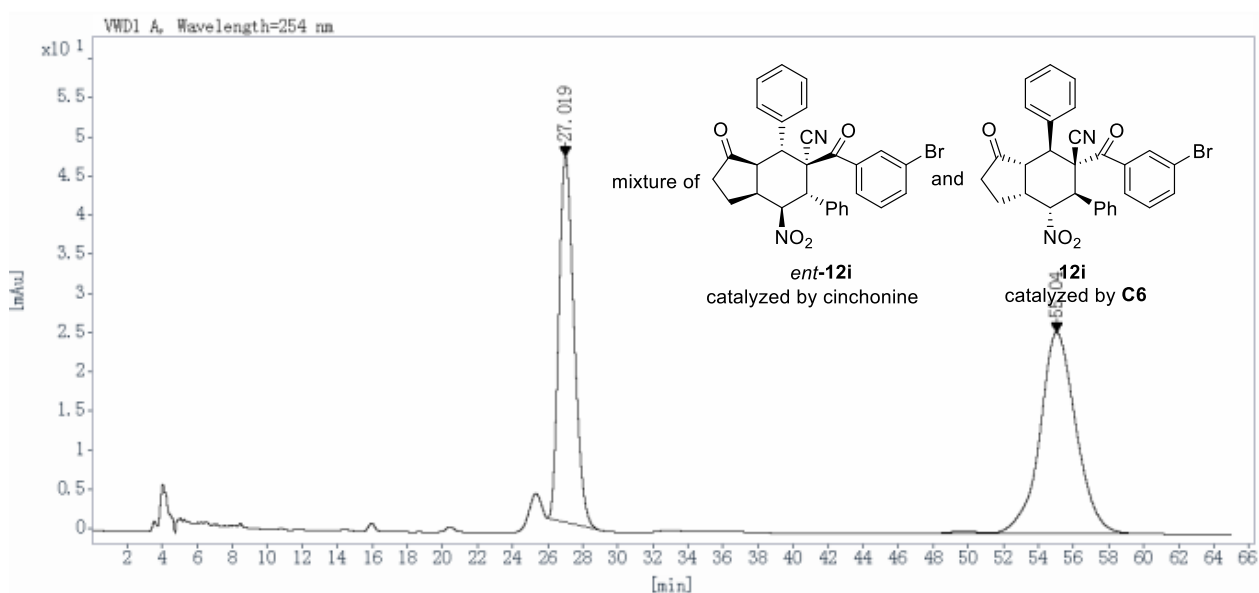

| Ret Time [min] | Peak Type | Width [min] | Height [mAU] | Area [mAU*s] | Area [%] |
|----------------|-----------|-------------|--------------|--------------|----------|
| 27.019         | BB        | 0.93        | 46.6330      | 2809.3738    | 42.8499  |
| 55.040         | VV R      | 2.14        | 25.7241      | 3746.9434    | 57.1501  |
| Totals:        |           |             |              | 6556.3171    | 100.0000 |

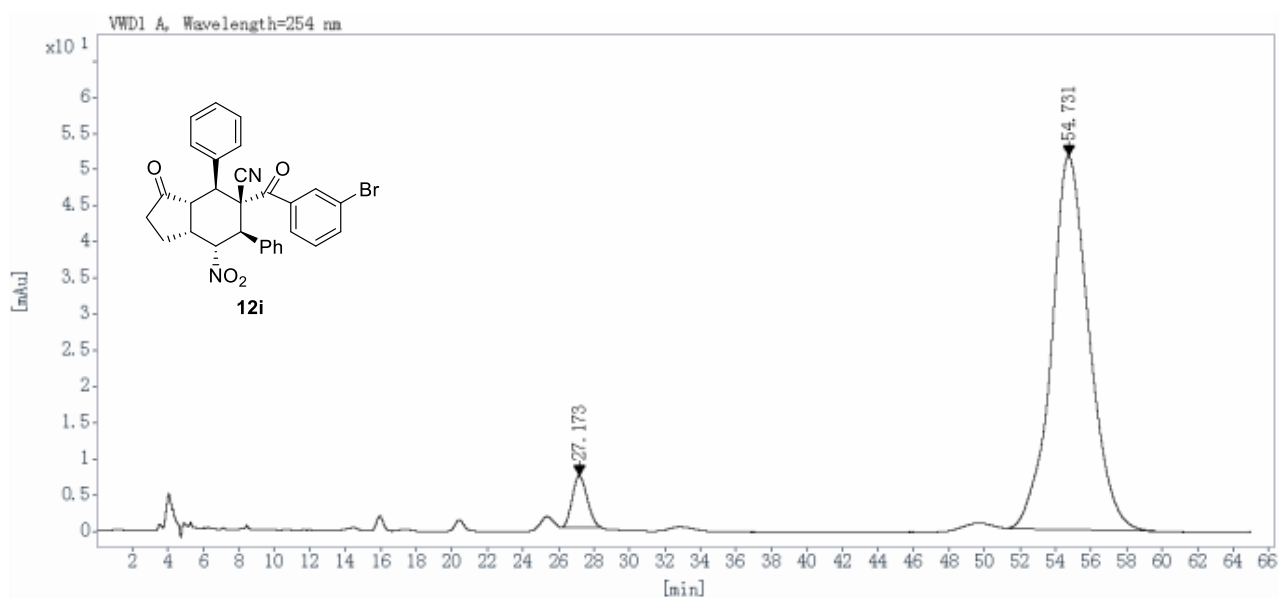

| Ret Time [min] | Peak Type | Width [min] | Height [mAU] | Area [mAU*s] | Area [%] |
|----------------|-----------|-------------|--------------|--------------|----------|
| 27.173         | BBA       | 0.91        | 7.0865       | 413.7141     | 5.1486   |
| 54.731         | BB        | 2.17        | 51.6717      | 7621.7832    | 94.8514  |
| Totals:        |           |             |              | 8035.4973    | 100.0000 |

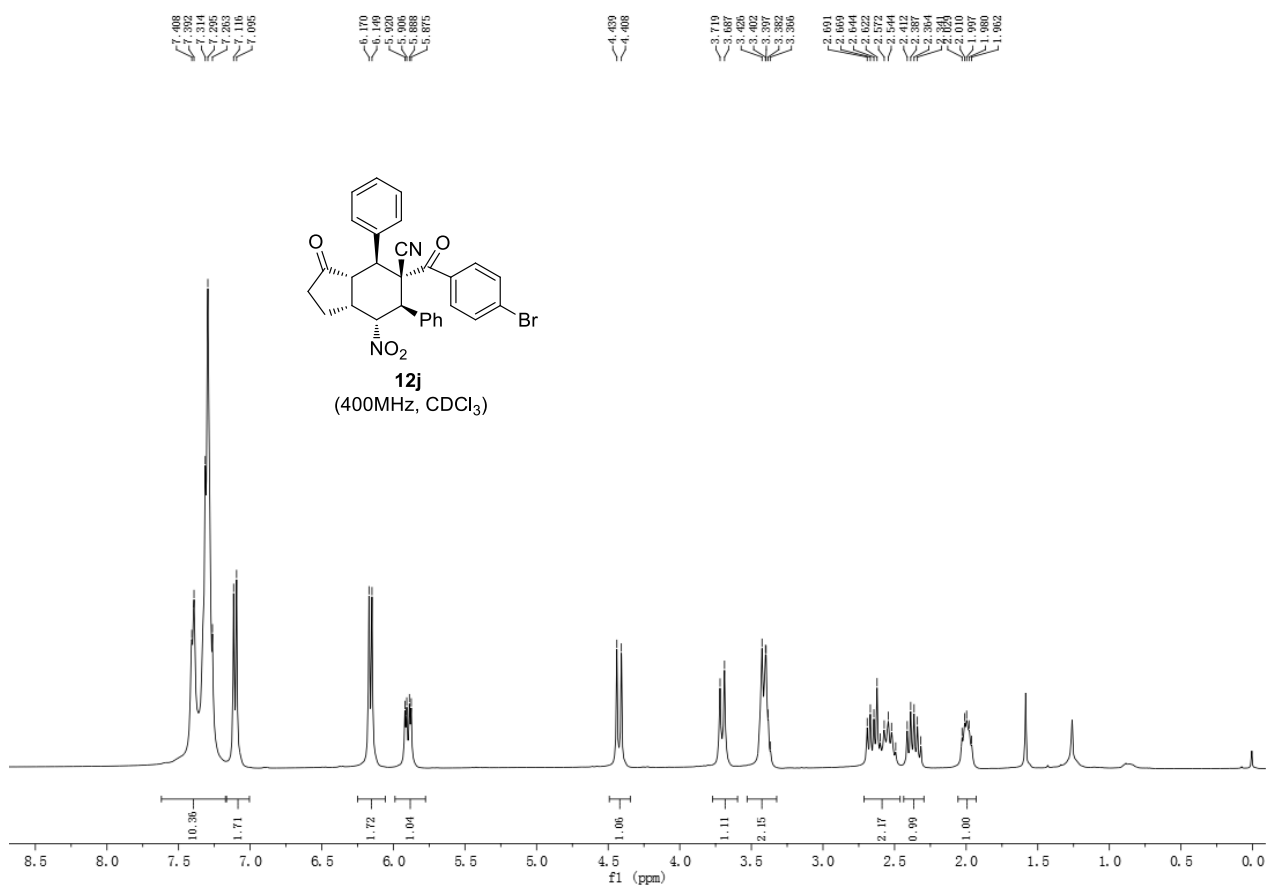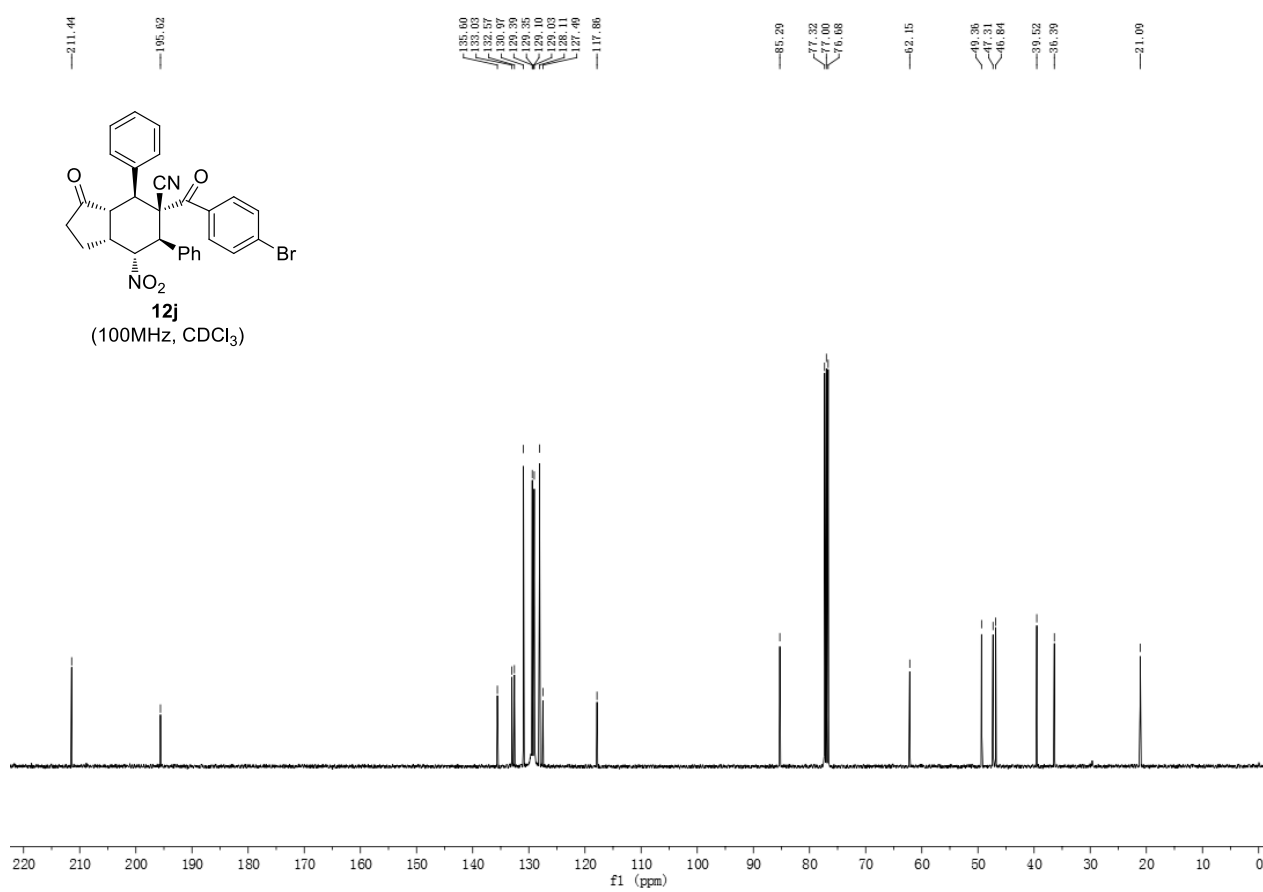

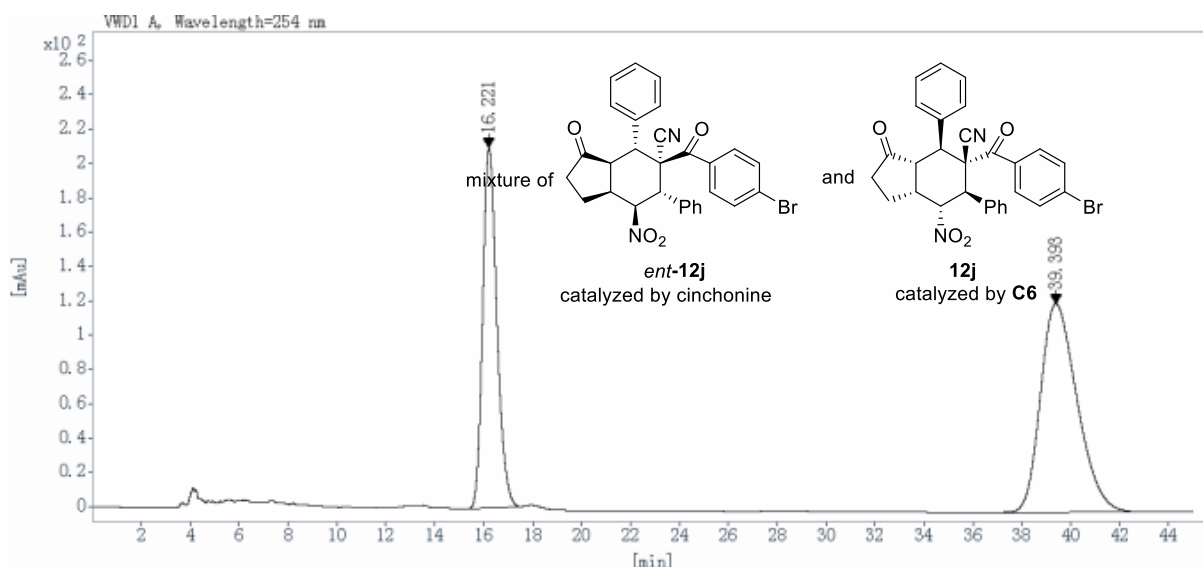

| Ret Time<br>[min] | Peak<br>Type | Width<br>[min] | Height<br>[mAU] | Area<br>[mAU*s] | Area<br>[%] |
|-------------------|--------------|----------------|-----------------|-----------------|-------------|
| 16.221            | BB           | 0.62           | 209.6729        | 8408.2002       | 40.0232     |
| 39.393            | BB           | 1.59           | 121.4745        | 12600.0928      | 59.9768     |
| Totals:           |              |                |                 | 21008.2930      | 100.0000    |

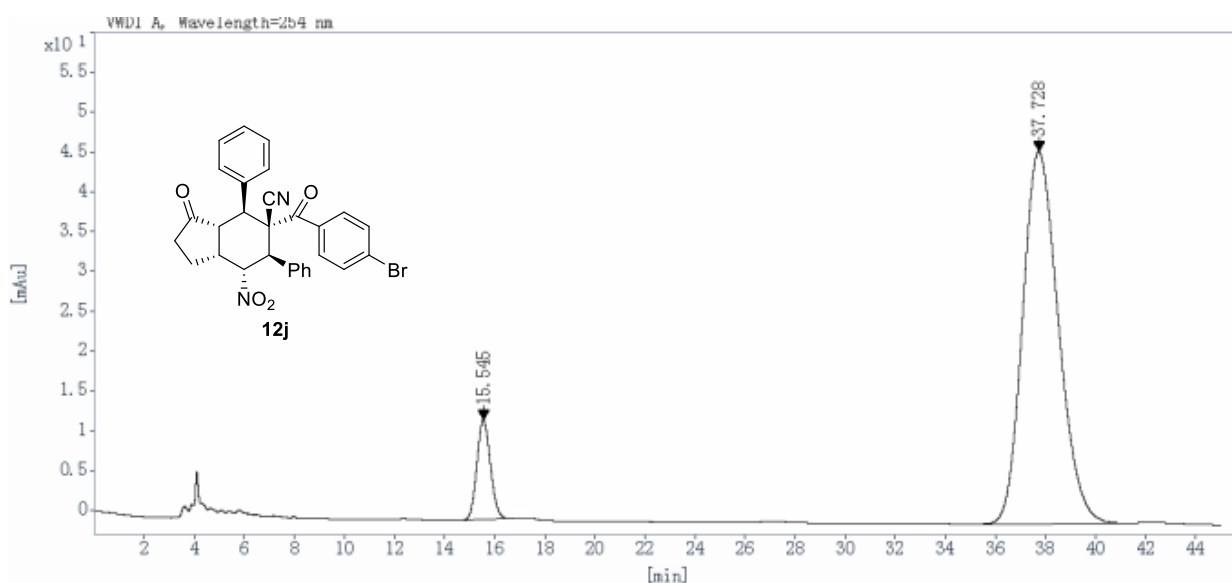

| Ret Time<br>[min] | Peak<br>Type | Width<br>[min] | Height<br>[mAU] | Area<br>[mAU*s] | Area<br>[%] |
|-------------------|--------------|----------------|-----------------|-----------------|-------------|
| 15.545            | BB           | 0.58           | 12.5185         | 468.5338        | 9.1841      |
| 37.728            | BB           | 1.53           | 46.6987         | 4633.0532       | 90.8159     |
| Totals:           |              |                |                 | 5101.5871       | 100.0000    |



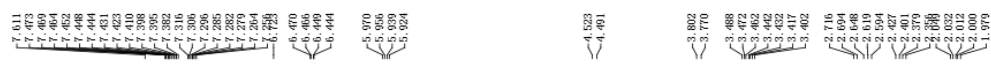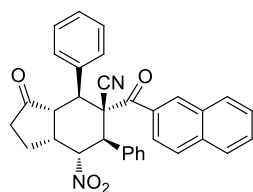

**12k**  
(400MHz, CDCl<sub>3</sub>)

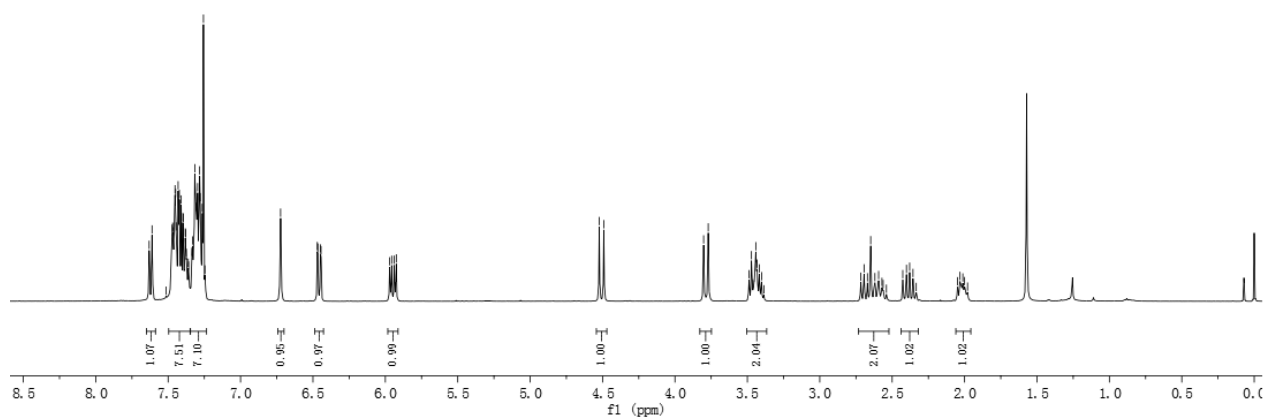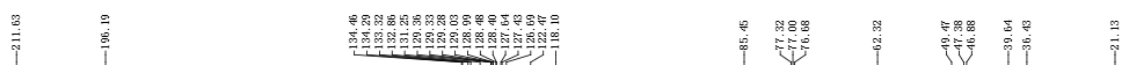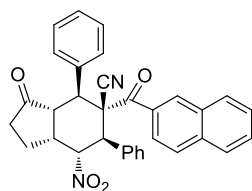

**12k**  
(100MHz, CDCl<sub>3</sub>)

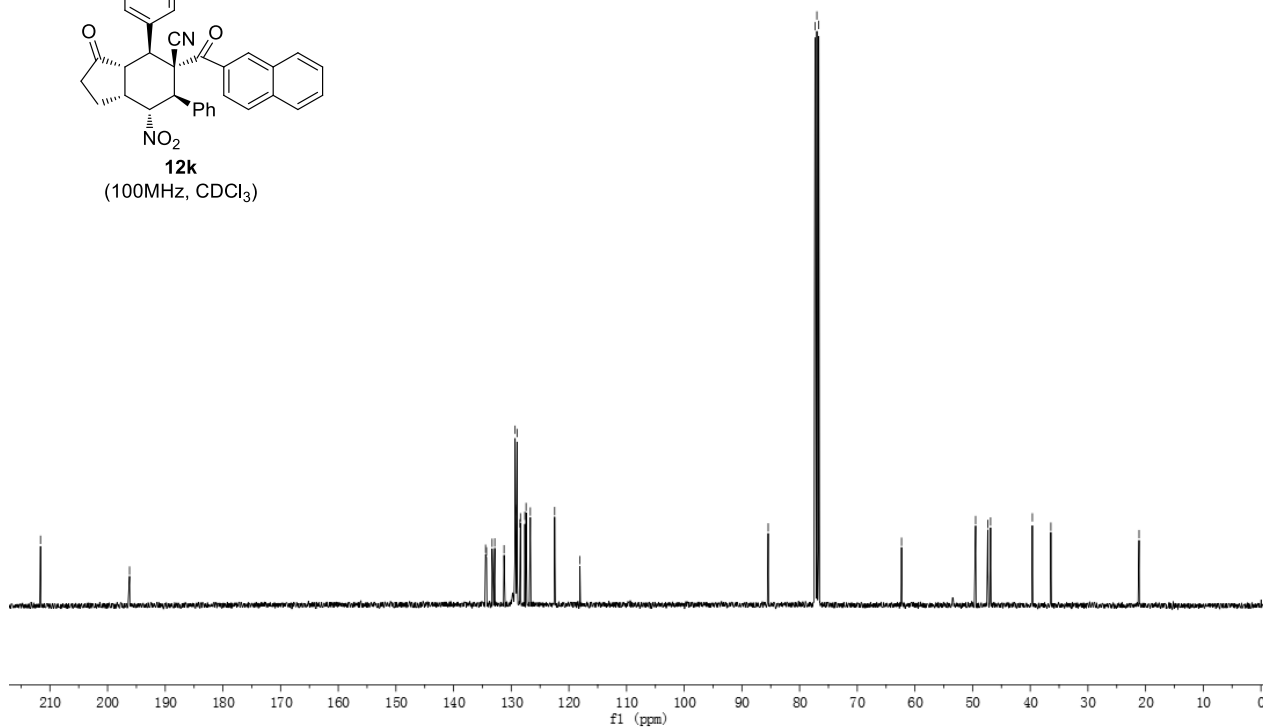

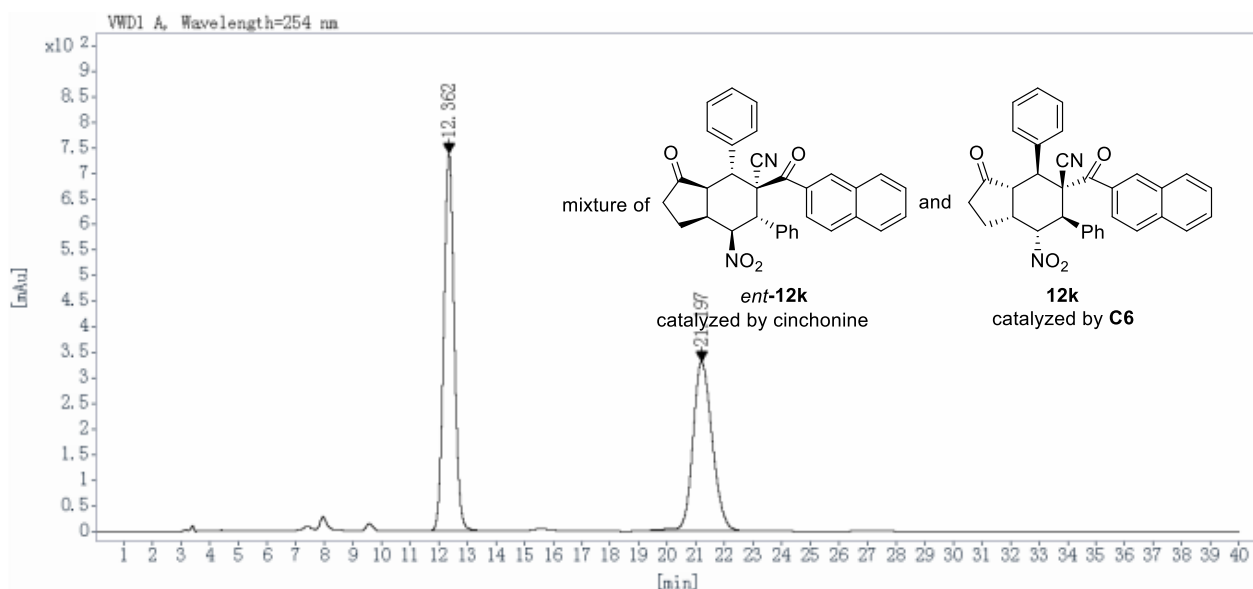

| Ret Time [min] | Peak Type | Width [min] | Height [mAU] | Area [mAU*s] | Area [%] |
|----------------|-----------|-------------|--------------|--------------|----------|
| 12.362         | BB        | 0.40        | 737.8484     | 18788.9141   | 54.6366  |
| 21.197         | BB        | 0.73        | 330.5725     | 15599.9814   | 45.3634  |
| Totals:        |           |             |              | 34388.8955   | 100.0000 |

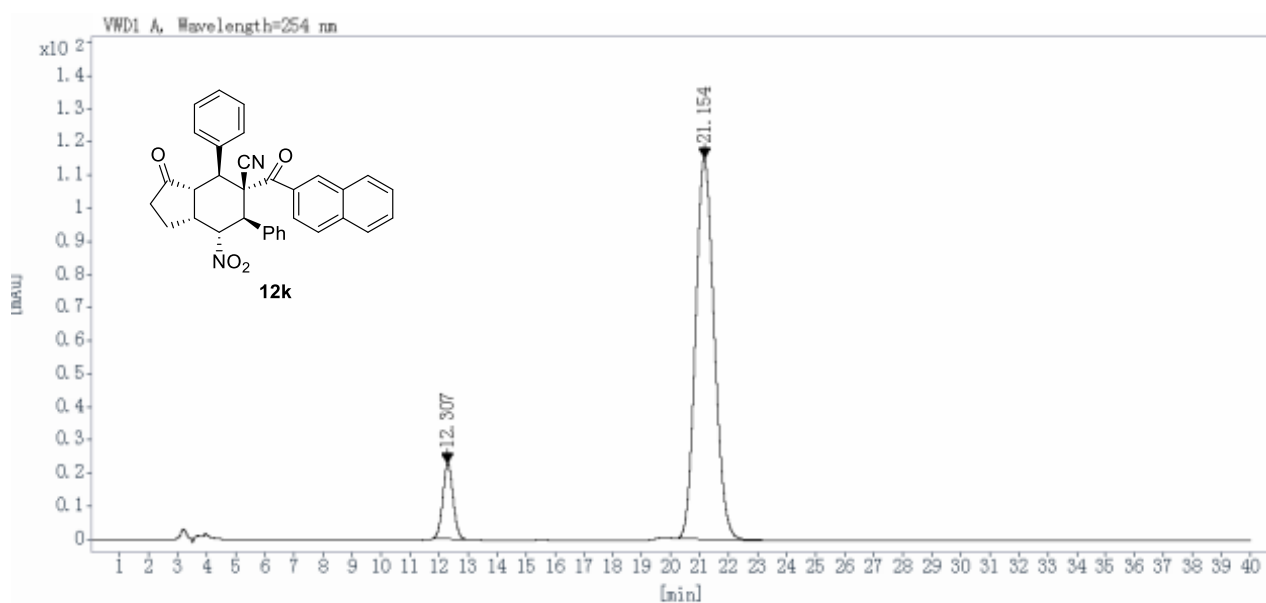

| Ret Time [min] | Peak Type | Width [min] | Height [mAU] | Area [mAU*s] | Area [%] |
|----------------|-----------|-------------|--------------|--------------|----------|
| 12.307         | BBA       | 0.38        | 22.7717      | 565.5047     | 9.8843   |
| 21.154         | BB        | 0.70        | 114.8843     | 5155.7139    | 90.1157  |
| Totals:        |           |             |              | 5721.2186    | 100.0000 |

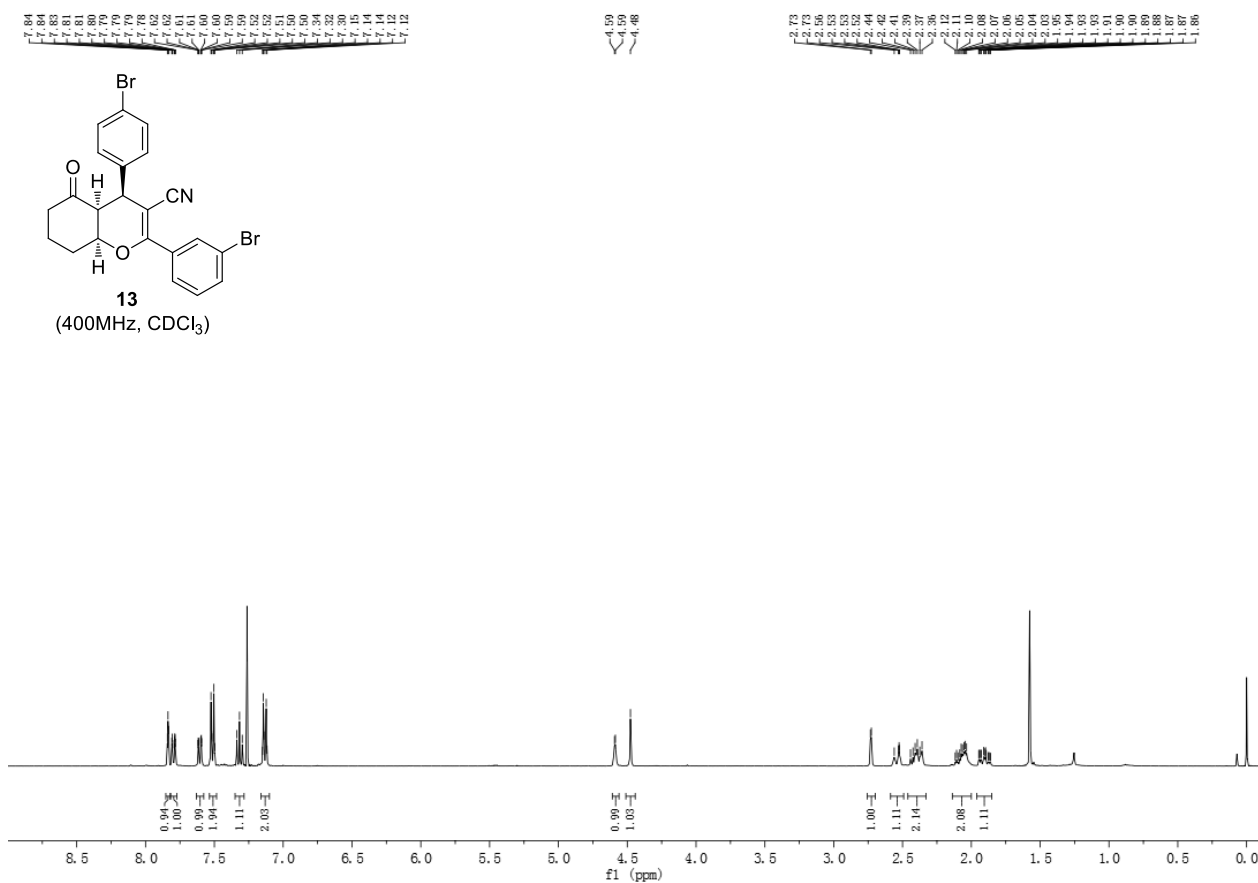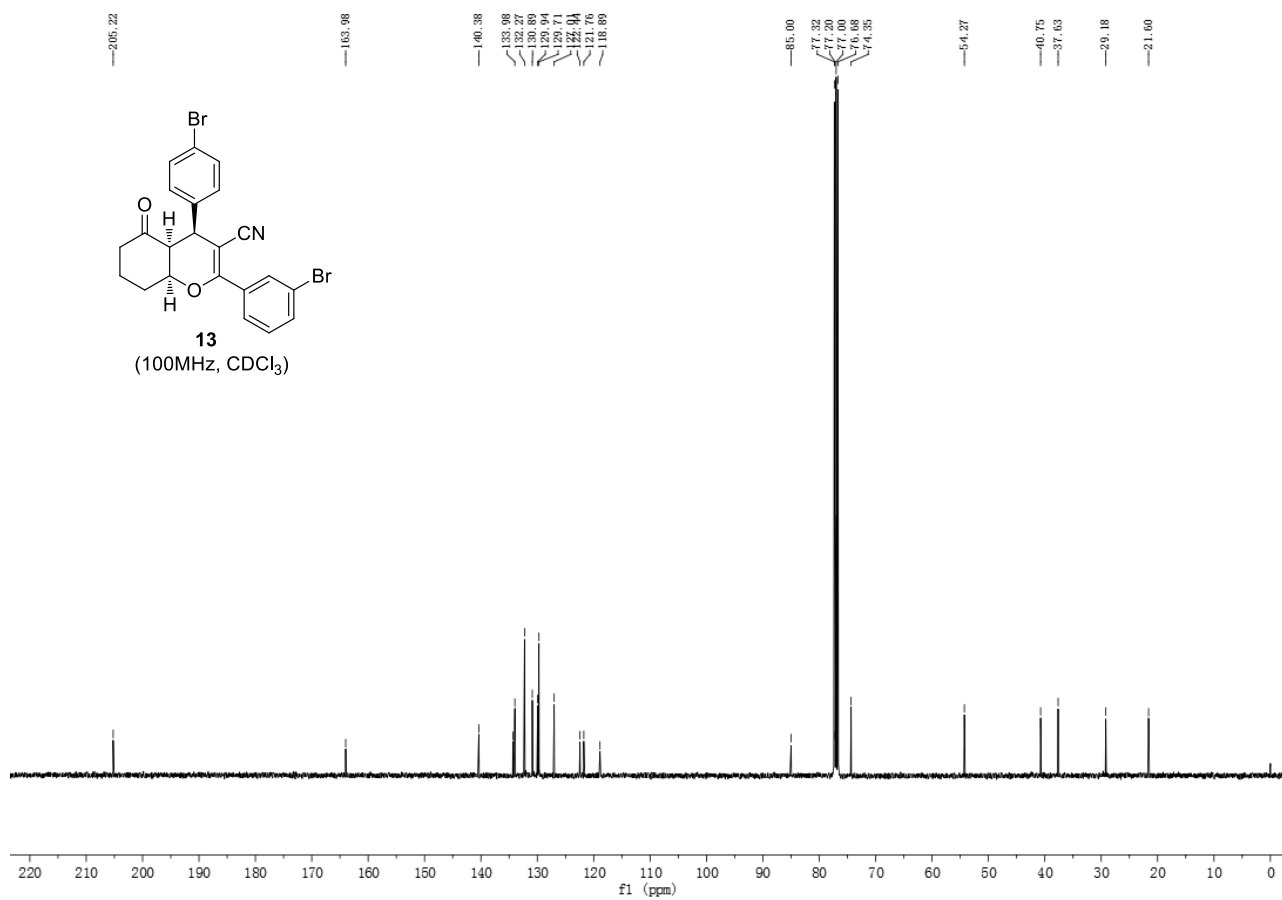

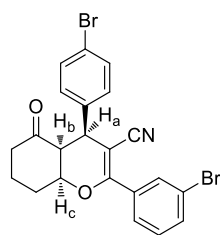

**13**  
 $^1\text{H}$  NMR (400MHz,  $\text{CDCl}_3$ )  
 $^{13}\text{C}$  NMR (100MHz,  $\text{CDCl}_3$ )

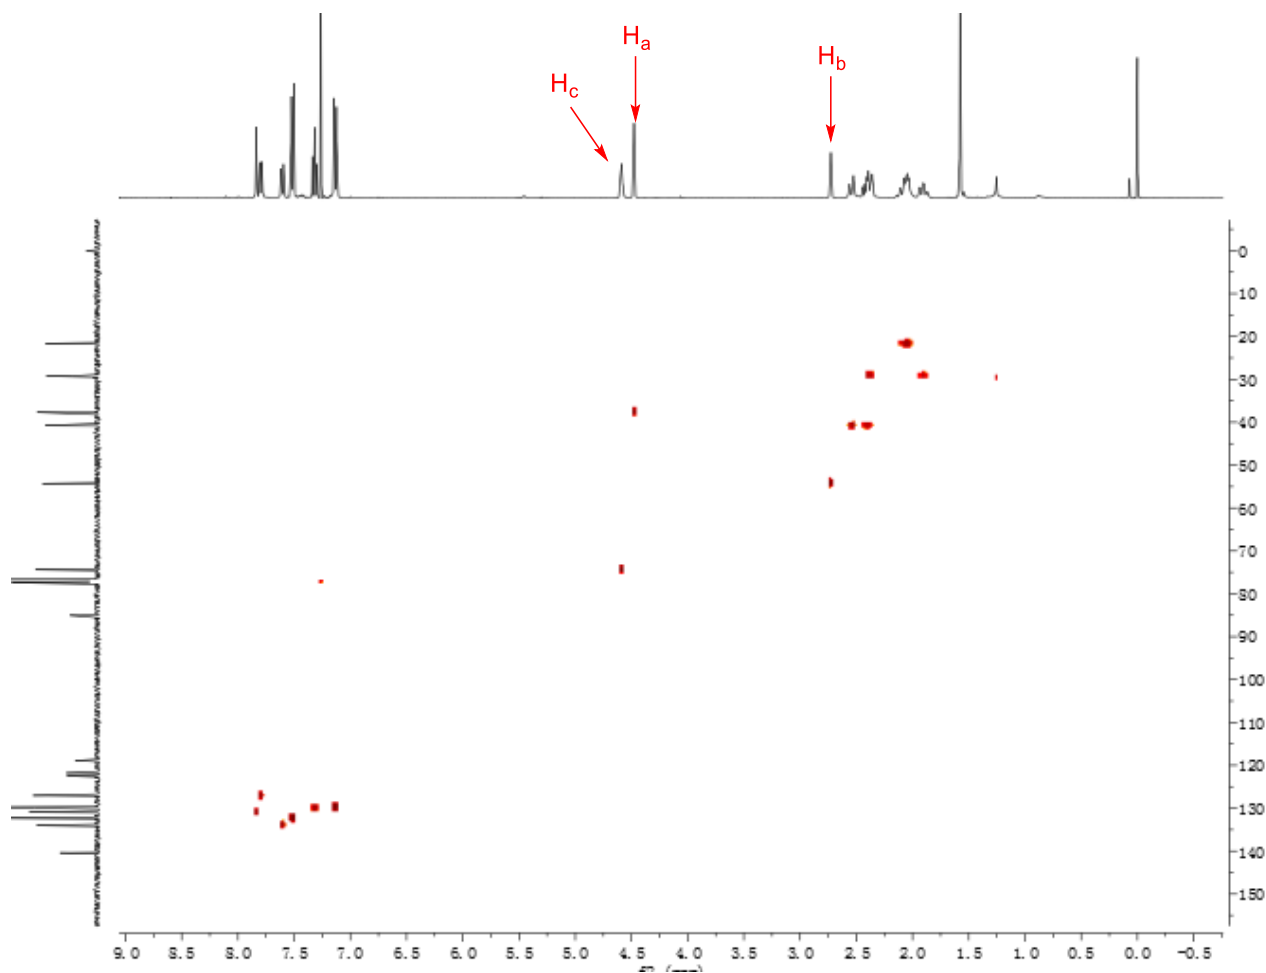

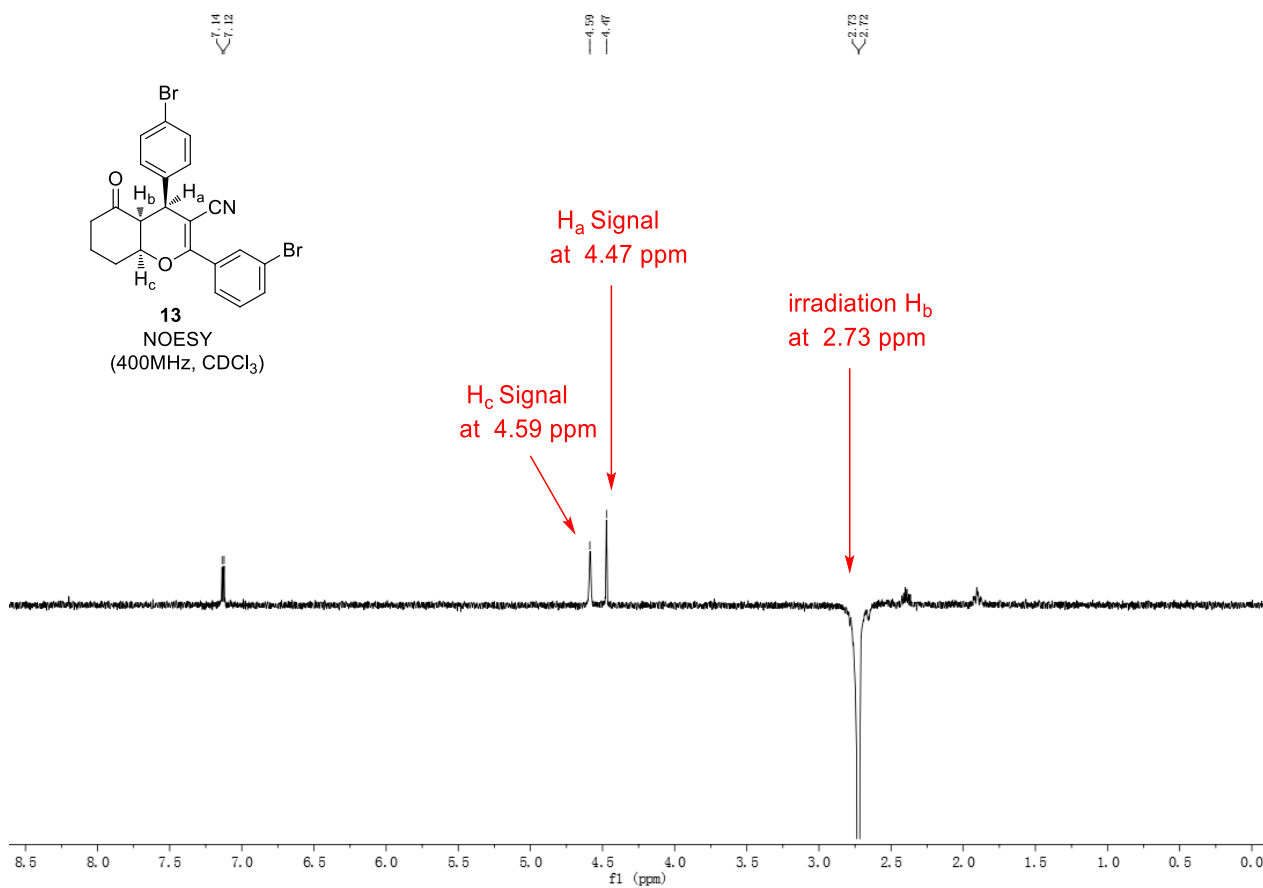

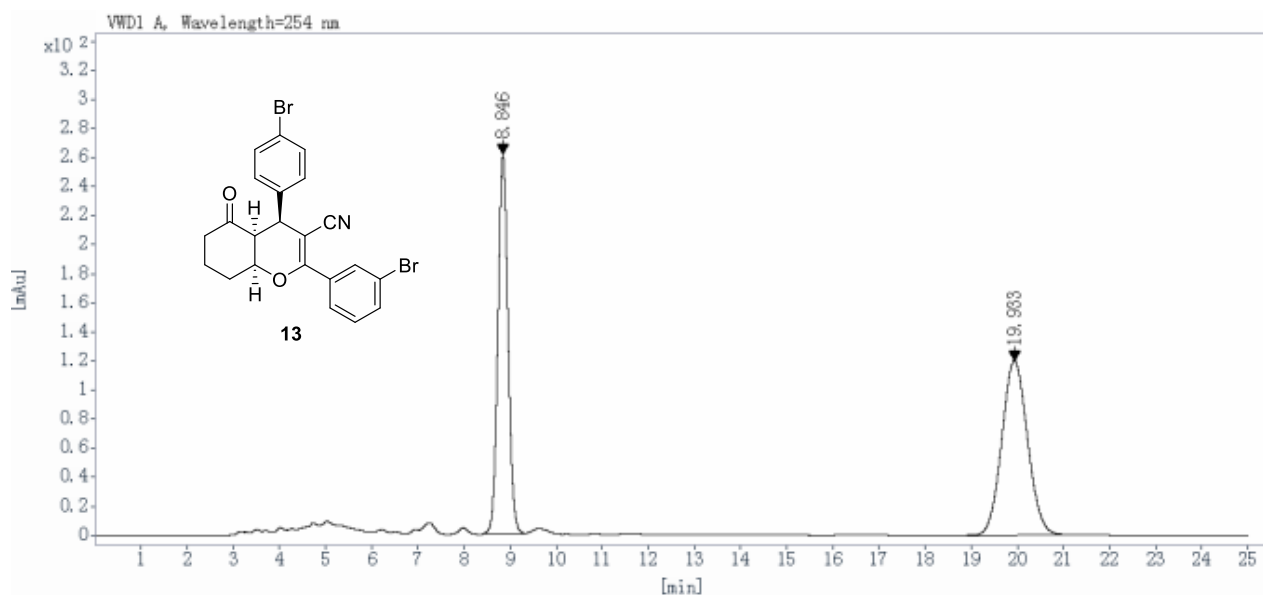

| Ret Time [min] | Peak Type | Width [min] | Height [mAU] | Area [mAU*s] | Area [%] |
|----------------|-----------|-------------|--------------|--------------|----------|
| 8.846          | BB        | 0.24        | 260.5586     | 3960.1890    | 46.0579  |
| 19.983         | BB        | 0.60        | 119.8027     | 4638.1021    | 53.9421  |
| Totals:        |           |             |              | 8598.2910    | 100.0000 |

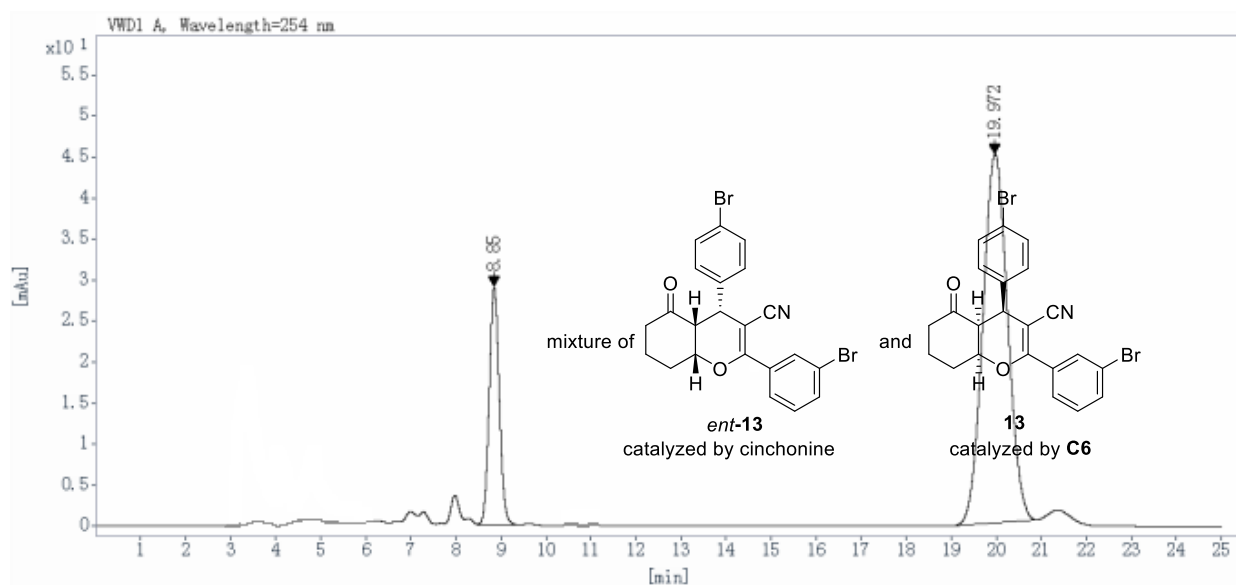

| Ret Time [min] | Peak Type | Width [min] | Height [mAU] | Area [mAU*s] | Area [%] |
|----------------|-----------|-------------|--------------|--------------|----------|
| 8.850          | BB        | 0.24        | 28.9652      | 448.3345     | 20.6686  |
| 19.972         | BB        | 0.60        | 44.9013      | 1720.8241    | 79.3314  |
| Totals:        |           |             |              | 2169.1586    | 100.0000 |

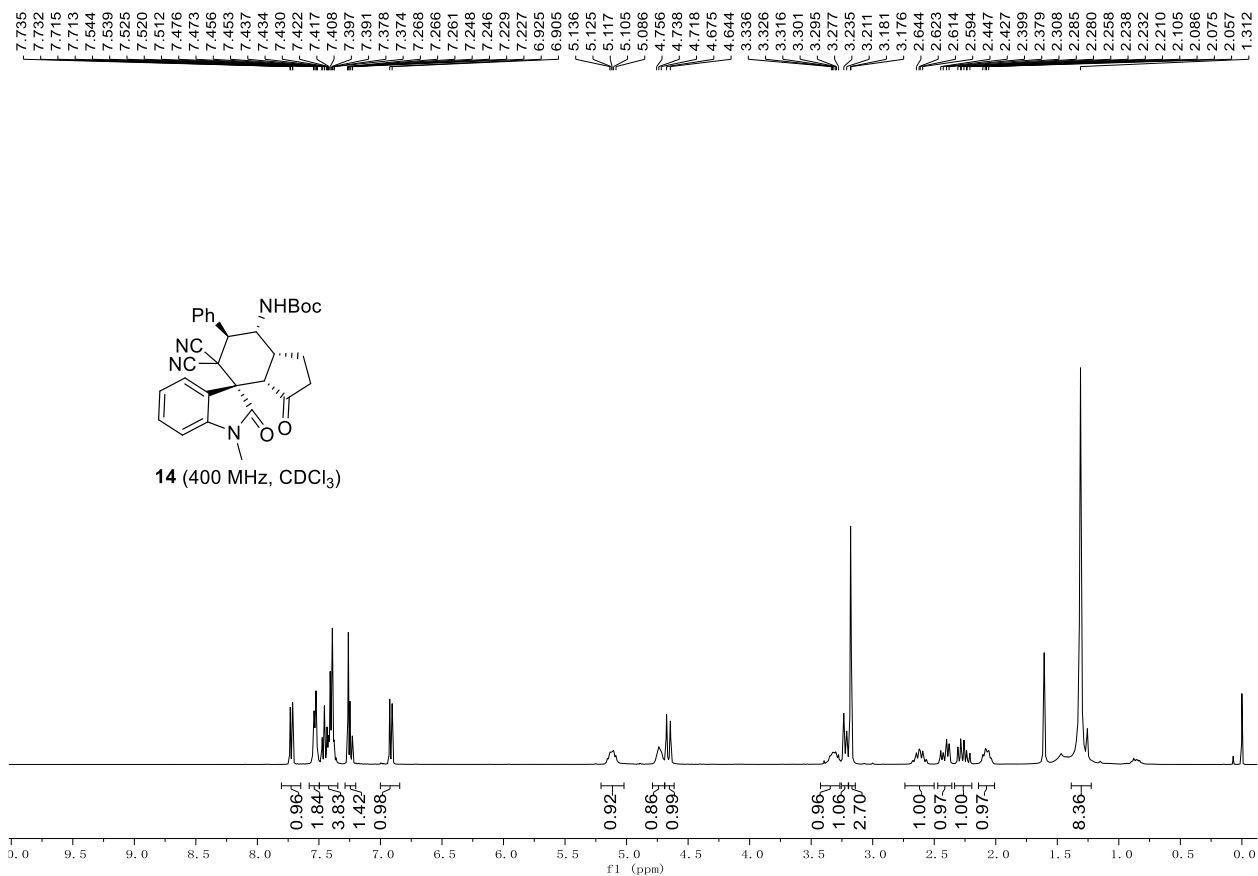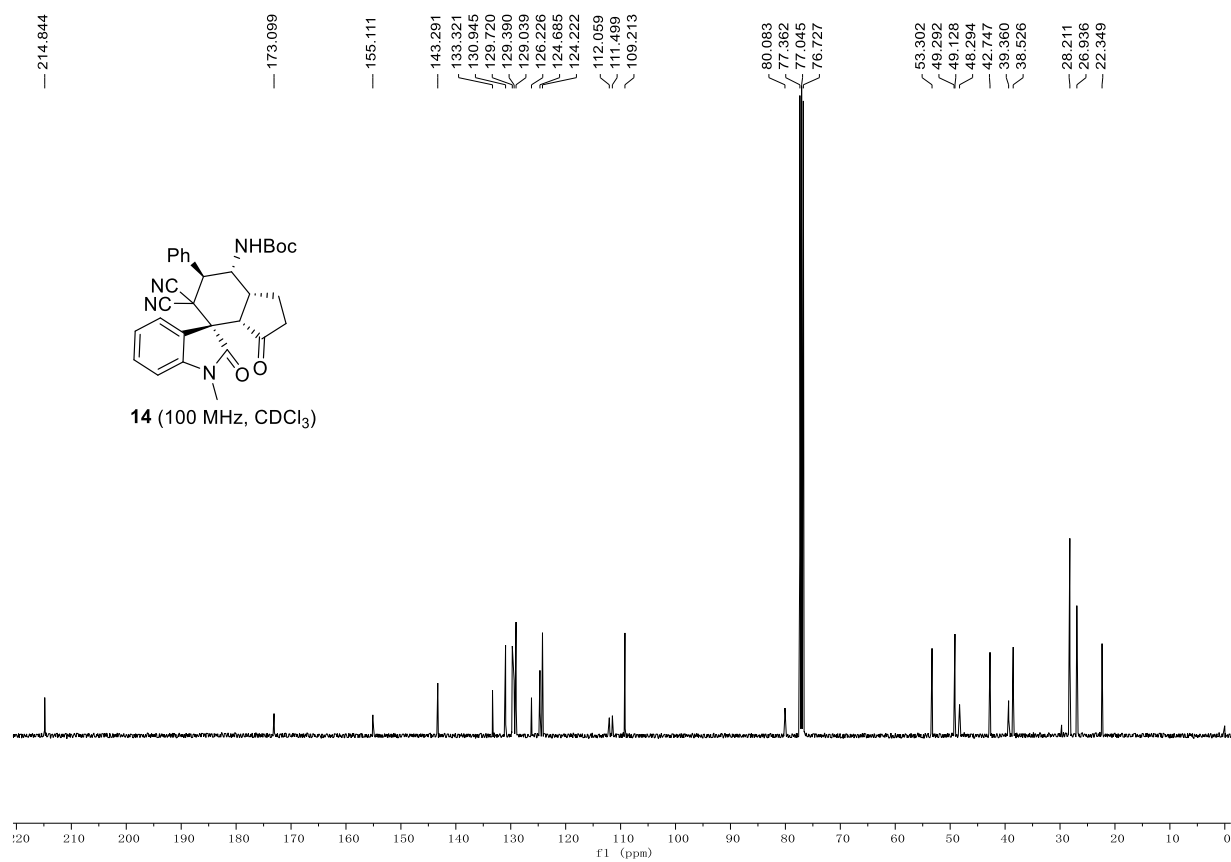

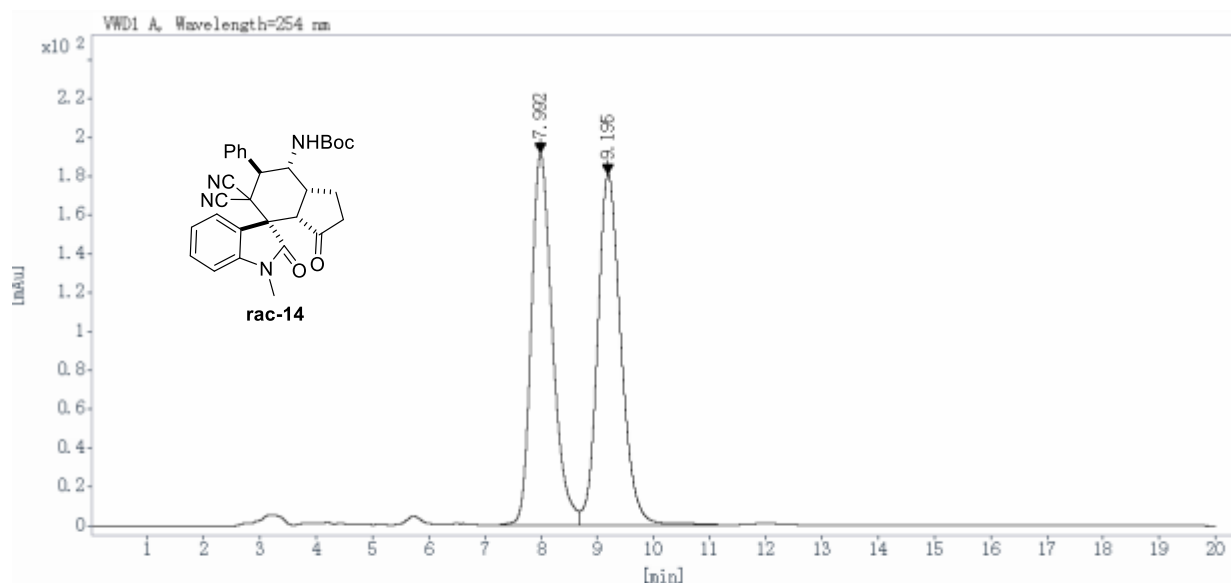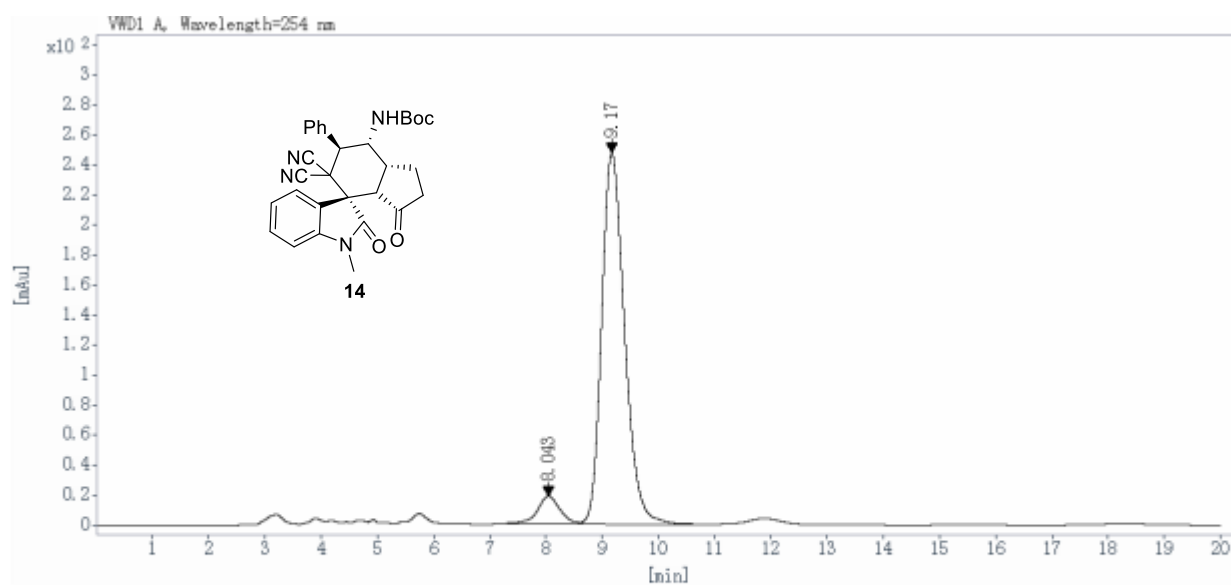



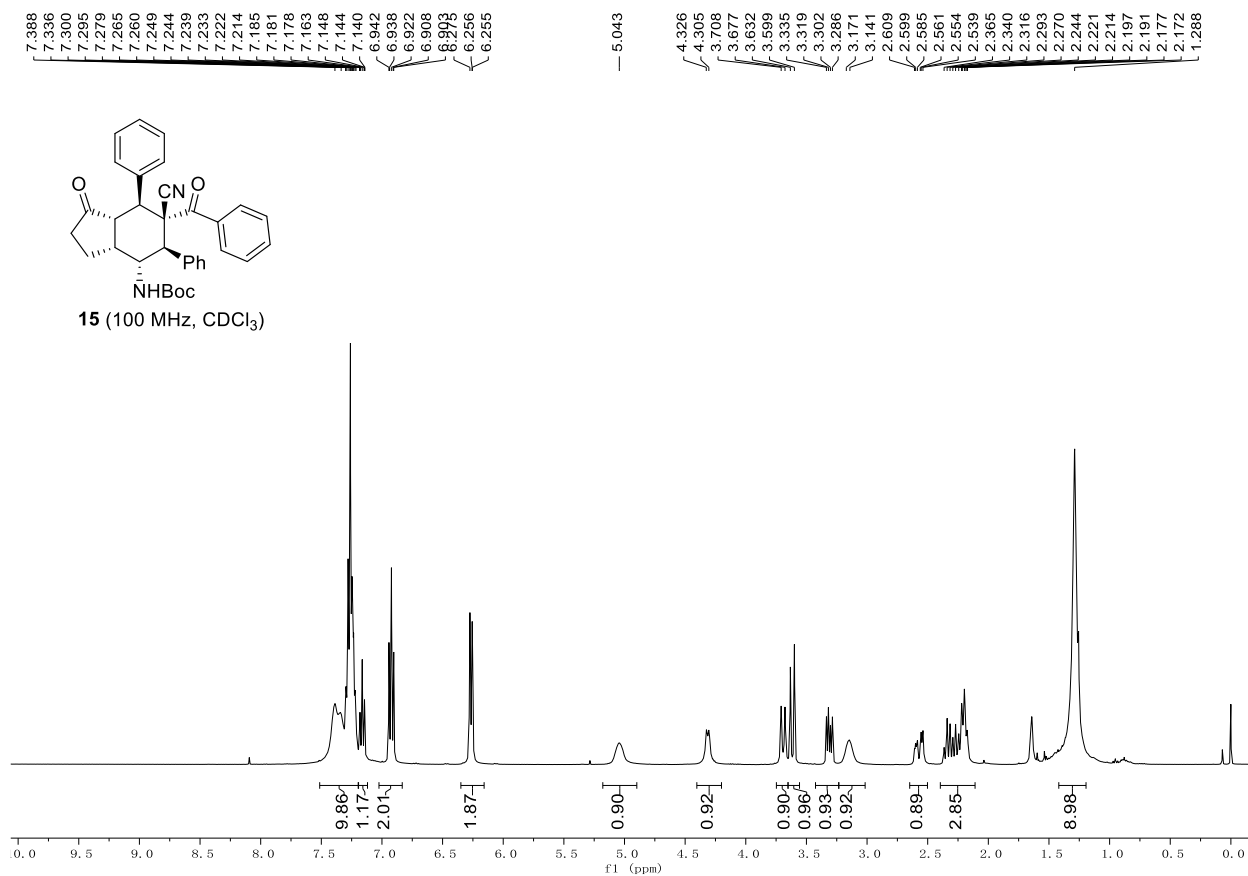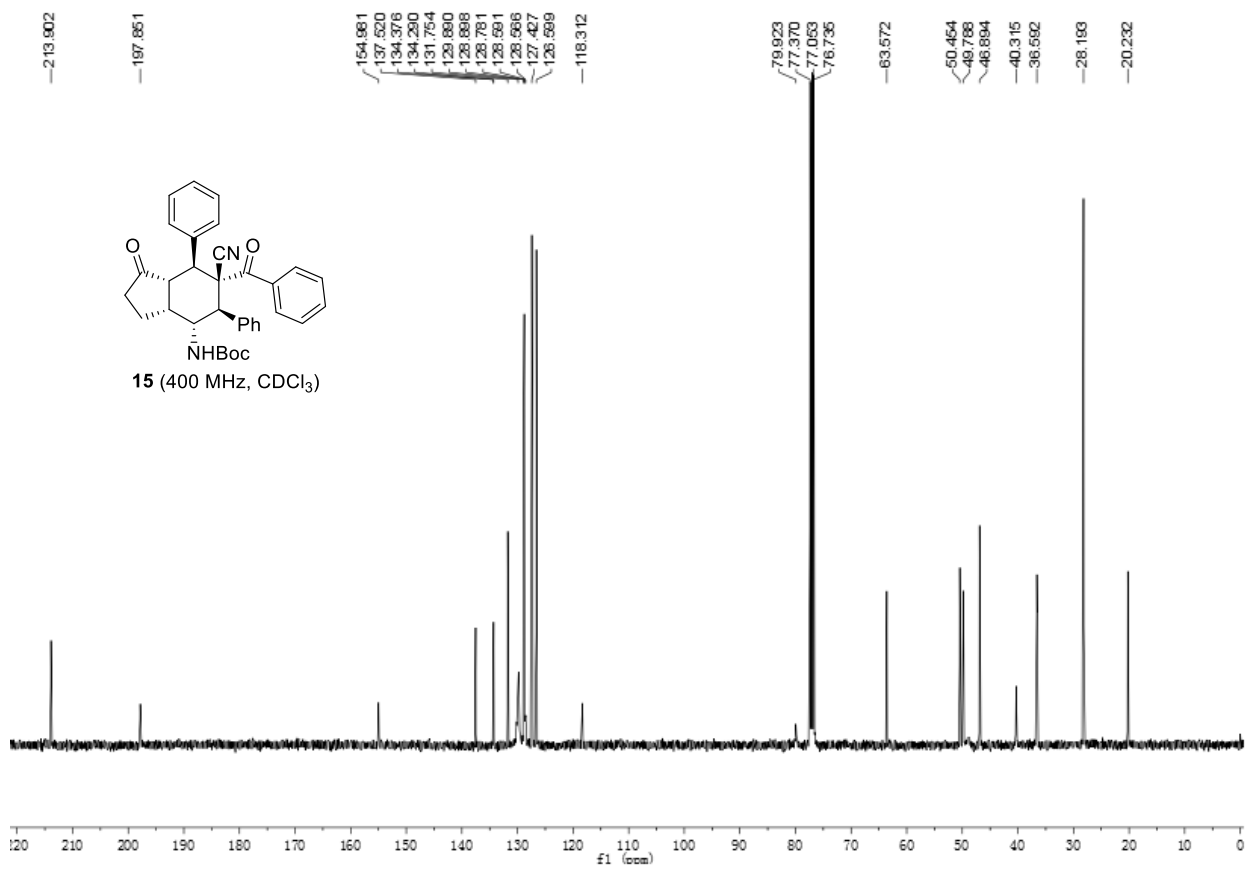

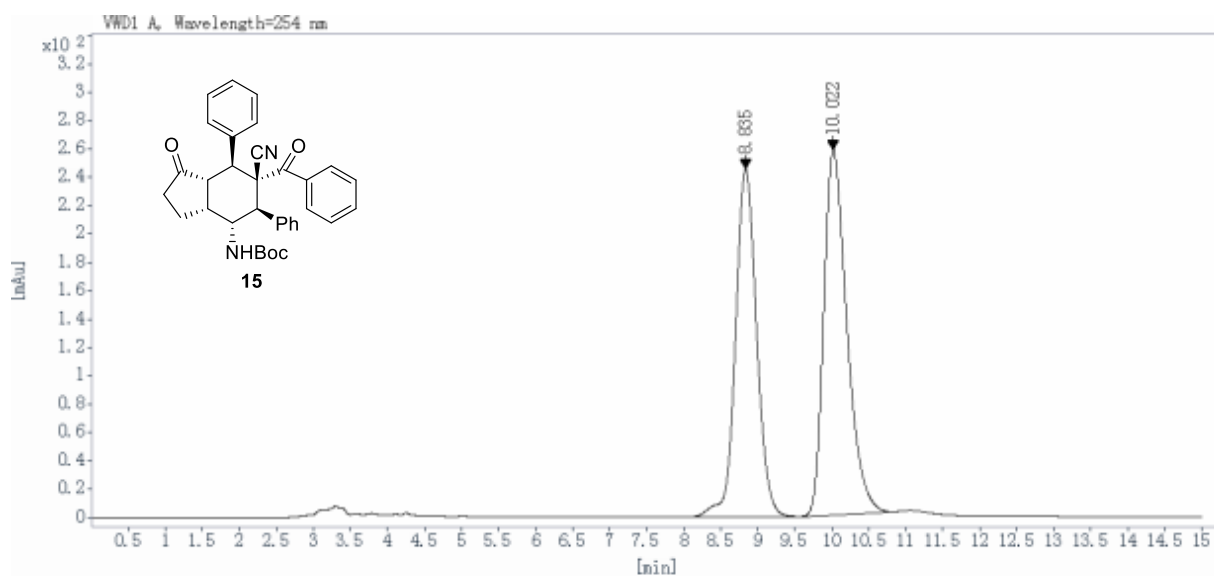

| Ret Time<br>[min] | Peak<br>Type | Width<br>[min] | Height<br>[mAU] | Area<br>[mAU*s] | Area<br>[%] |
|-------------------|--------------|----------------|-----------------|-----------------|-------------|
| 8.835             | BB           | 0.31           | 244.9575        | 4879.1611       | 46.5816     |
| 10.022            | BB           | 0.33           | 257.0048        | 5595.2871       | 53.4184     |
| Totals:           |              |                |                 | 10474.4482      | 100.0000    |

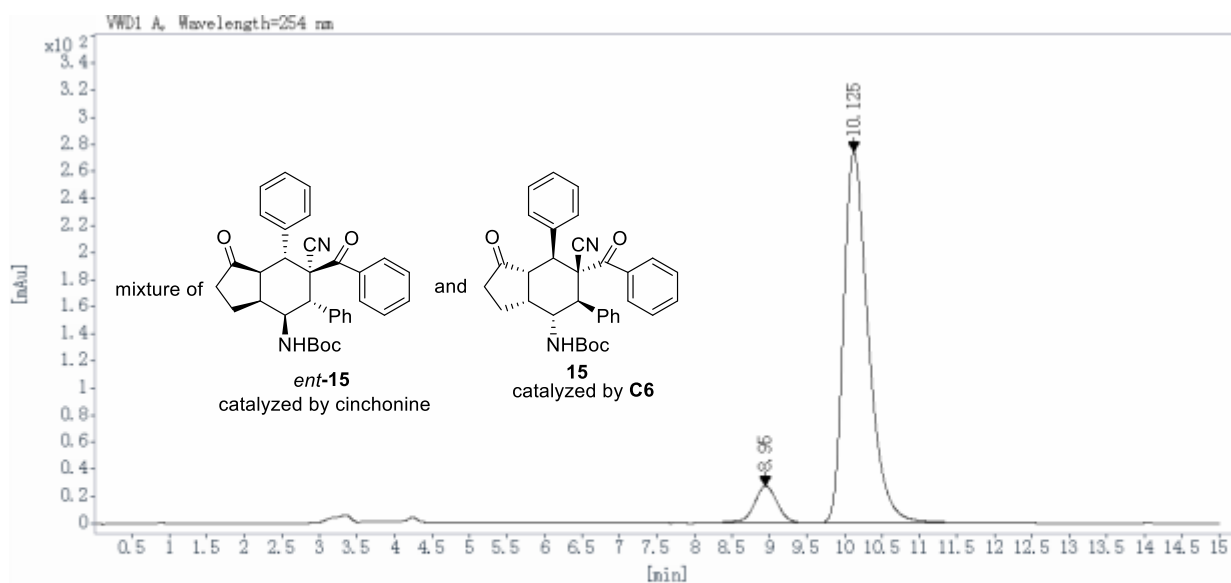

| Ret Time<br>[min] | Peak<br>Type | Width<br>[min] | Height<br>[mAU] | Area<br>[mAU*s] | Area<br>[%] |
|-------------------|--------------|----------------|-----------------|-----------------|-------------|
| 8.950             | BB           | 0.33           | 27.2439         | 587.9487        | 8.5186      |
| 10.125            | BB           | 0.35           | 273.8868        | 6313.9658       | 91.4814     |
| Totals:           |              |                |                 | 6901.9145       | 100.0000    |

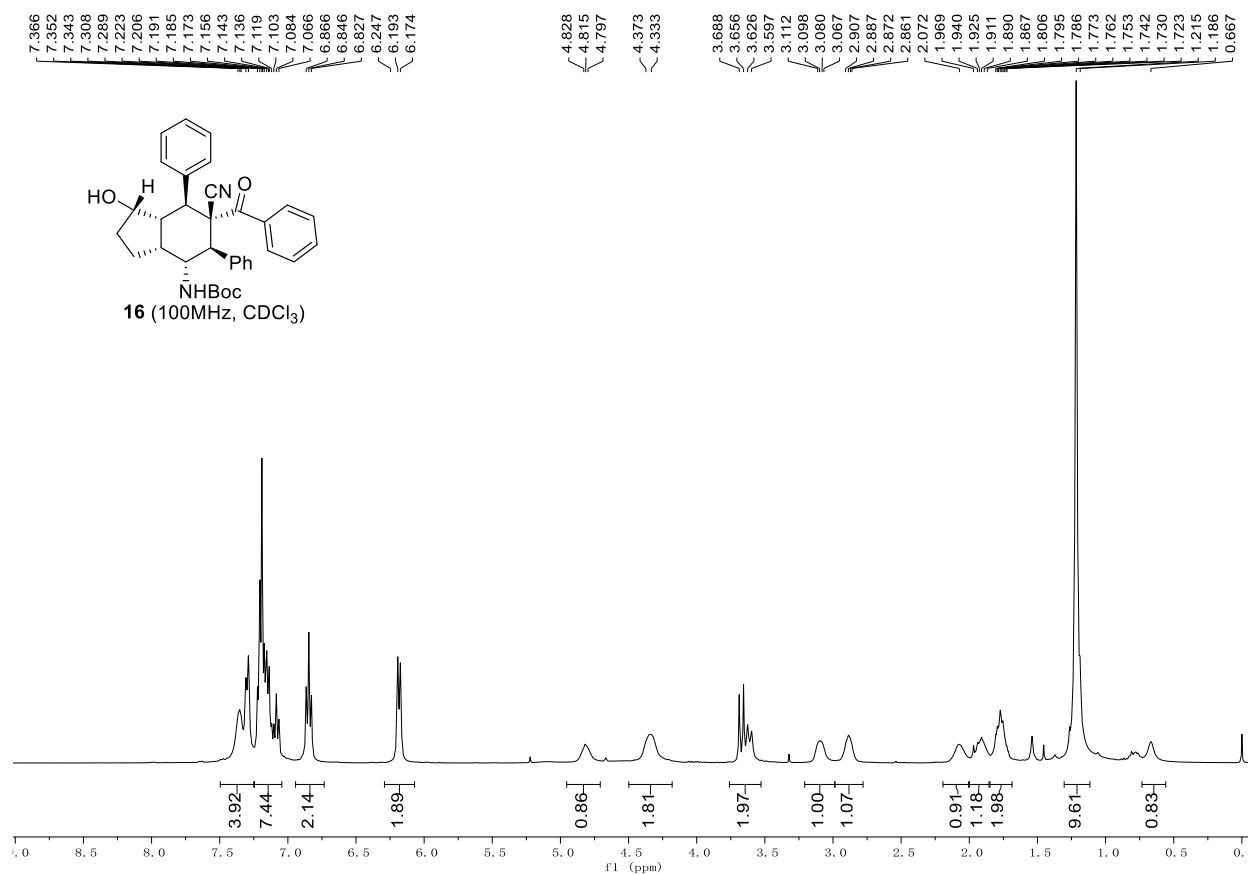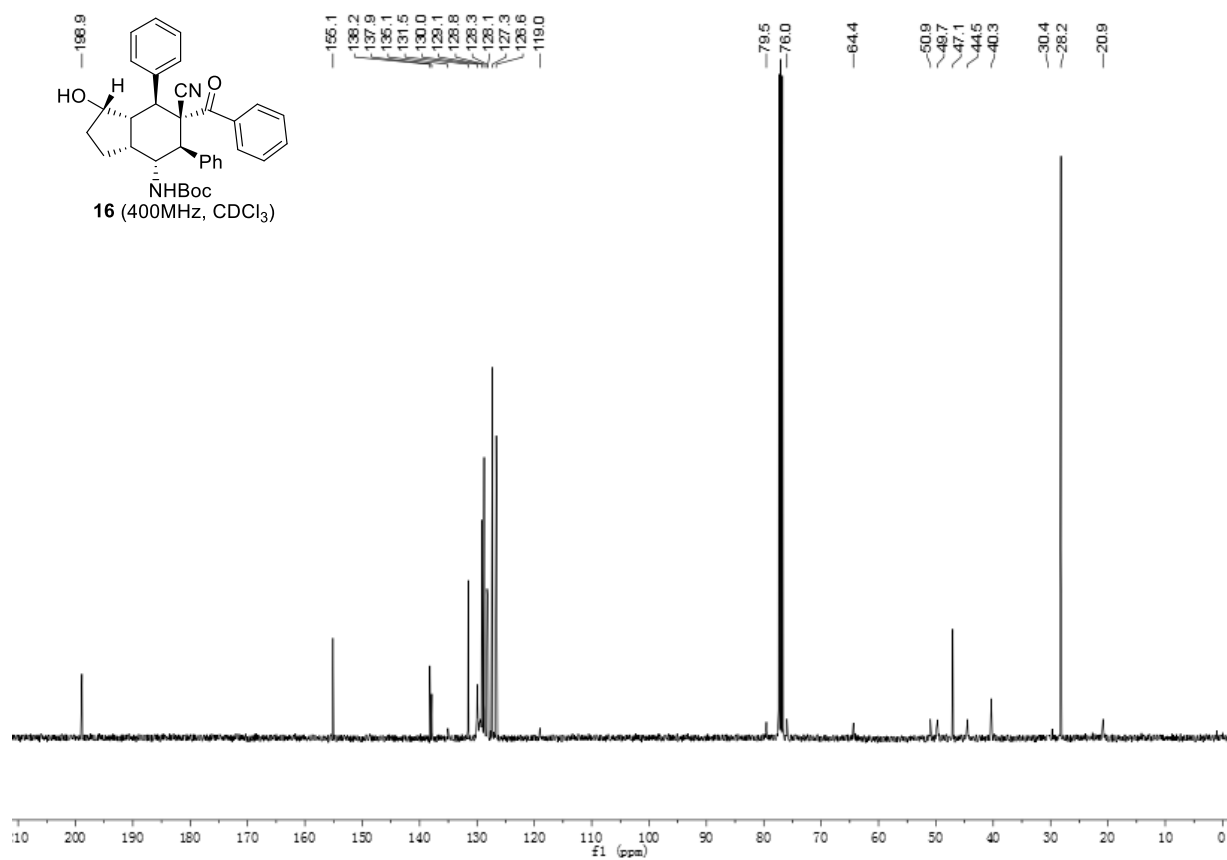

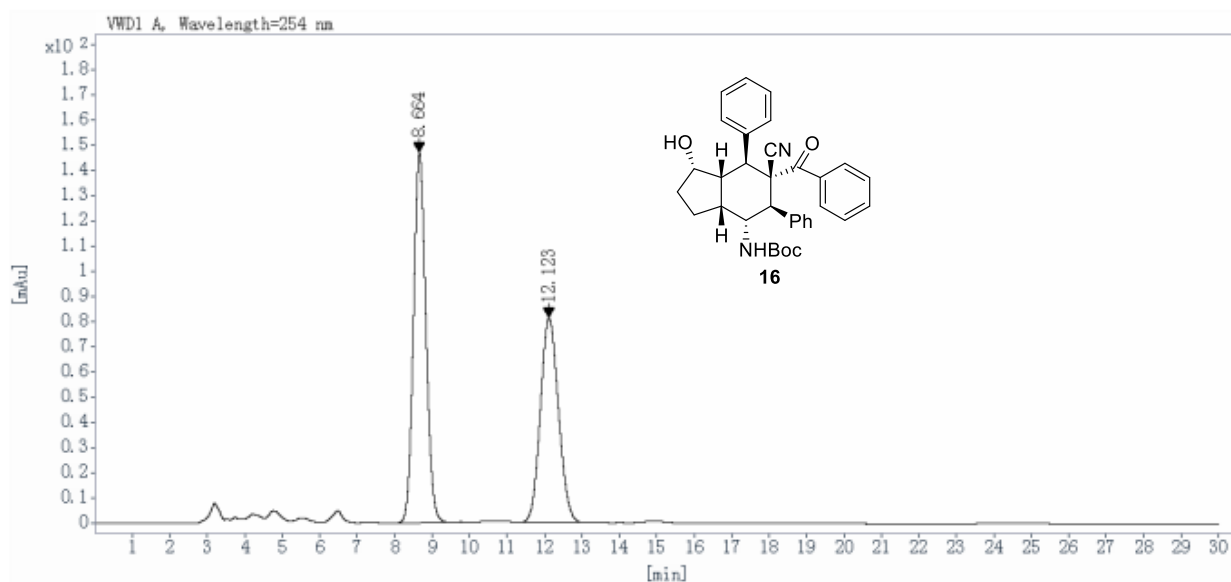

| Ret Time<br>[min] | Peak<br>Type | Width<br>[min] | Height<br>[mAU] | Area<br>[mAU*s] | Area<br>[%] |
|-------------------|--------------|----------------|-----------------|-----------------|-------------|
| 8.664             | BB           | 0.36           | 146.8844        | 3369.2568       | 55.3245     |
| 12.123            | BB           | 0.52           | 81.1911         | 2720.7334       | 44.6755     |
| Totals:           |              |                |                 | 6089.9902       | 100.0000    |

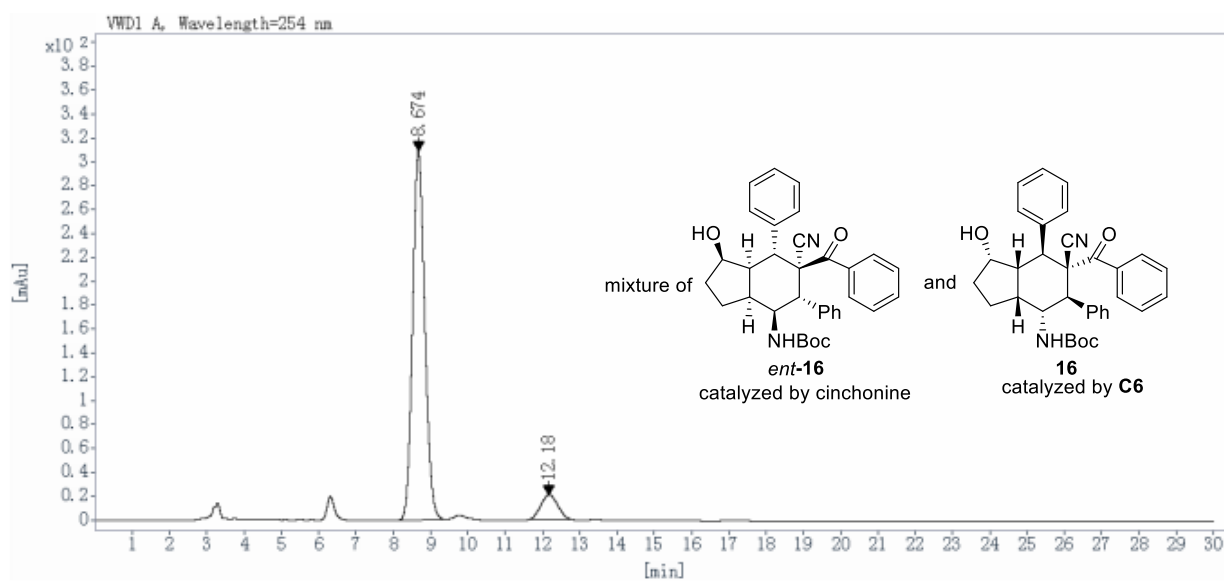

| Ret Time<br>[min] | Peak<br>Type | Width<br>[min] | Height<br>[mAU] | Area<br>[mAU*s] | Area<br>[%] |
|-------------------|--------------|----------------|-----------------|-----------------|-------------|
| 8.674             | BB           | 0.35           | 308.3178        | 7006.1206       | 91.4741     |
| 12.180            | BBA          | 0.50           | 20.6211         | 653.0064        | 8.5259      |
| Totals:           |              |                |                 | 7659.1270       | 100.0000    |

7.356  
7.337  
7.332  
7.315  
7.255  
7.237  
7.226  
7.220  
7.217  
7.205  
7.200  
7.190  
7.185  
7.182  
7.177  
7.173  
7.167  
7.160  
7.151  
7.149  
7.145  
7.123  
7.105  
7.101  
7.089  
7.085  
7.082  
6.878  
6.873  
6.868  
6.842  
6.838  
6.201  
6.197  
6.181  
6.177  
5.742  
5.728  
5.711  
5.686  
4.457  
4.444  
4.435  
4.321  
4.289  
3.801  
3.770  
3.292  
3.278  
3.262  
3.246  
3.232  
3.232  
3.073  
3.067  
3.059  
3.052  
3.038  
2.263  
2.248  
2.169  
2.134  
2.119  
1.850  
1.821  
1.573  
1.561  
1.550  
1.539  
1.527  
0.642  
0.630

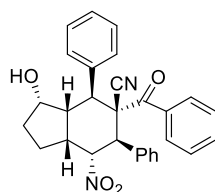

17 (100MHz, CDCl<sub>3</sub>)

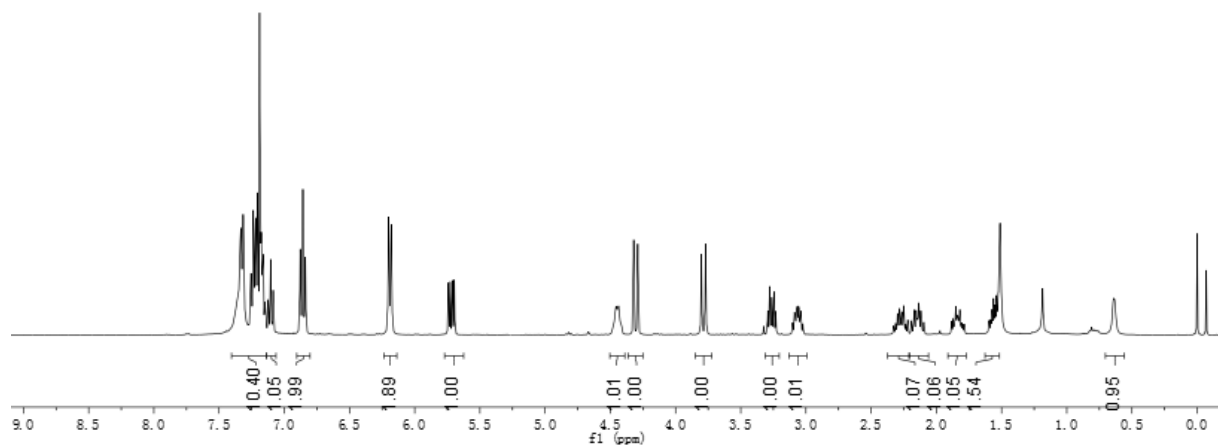

— 197.588

137.719  
137.583  
133.539  
132.247  
129.693  
129.535  
129.320  
128.785  
127.799  
126.985  
118.982

— 86.403

77.583  
77.372  
77.160  
76.143

— 63.416

47.418  
47.360  
44.805  
40.779

— 30.597

— 21.556

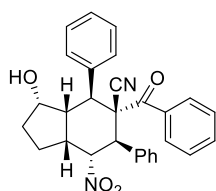

17 (400MHz, CDCl<sub>3</sub>)

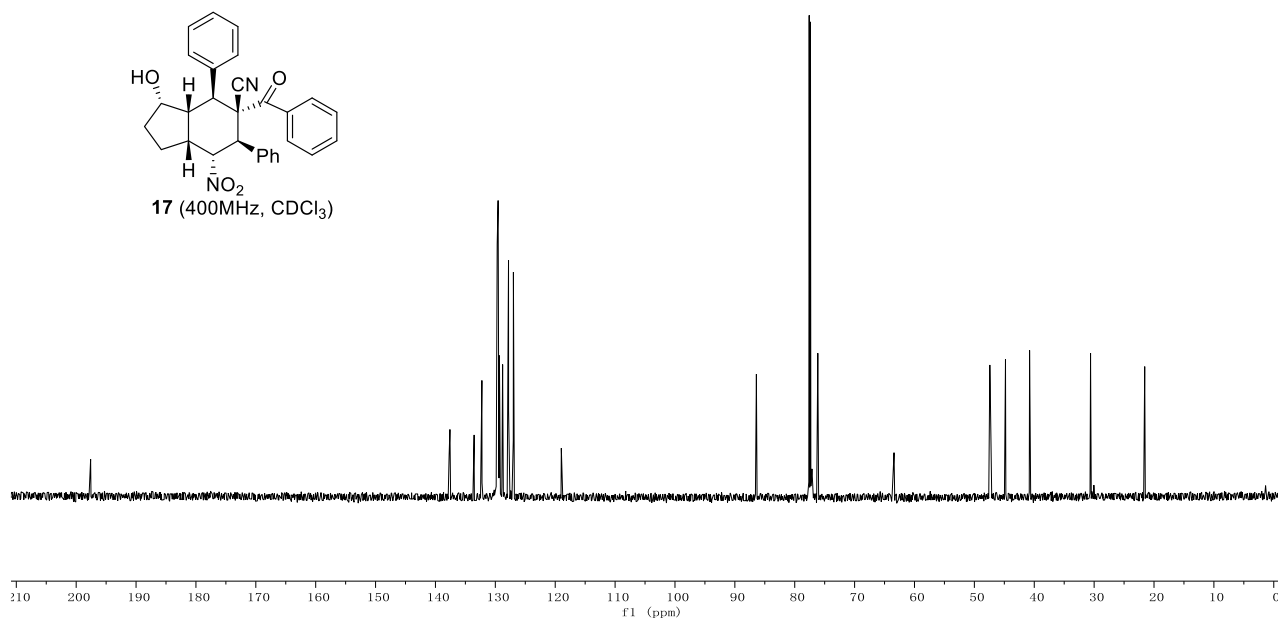

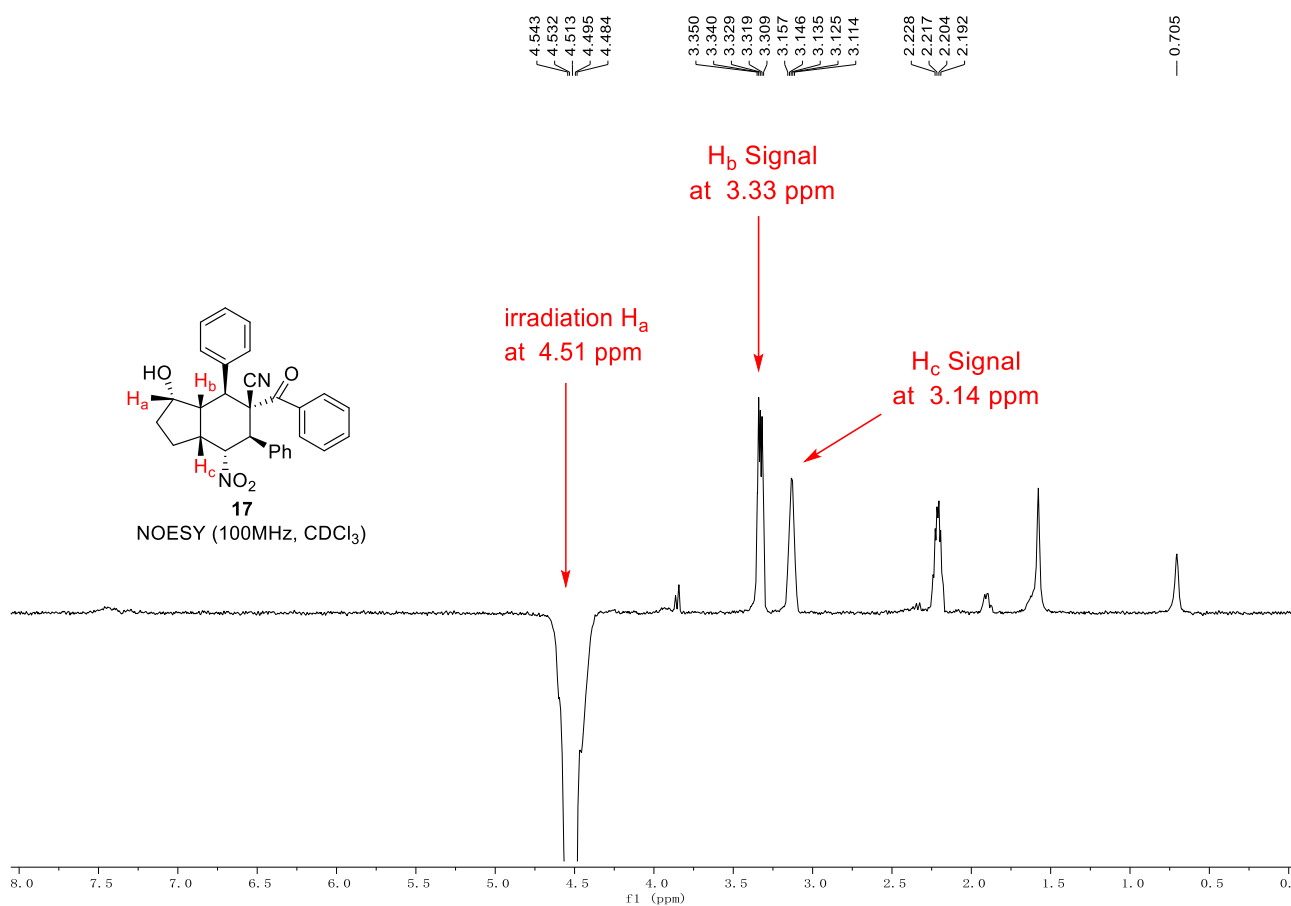

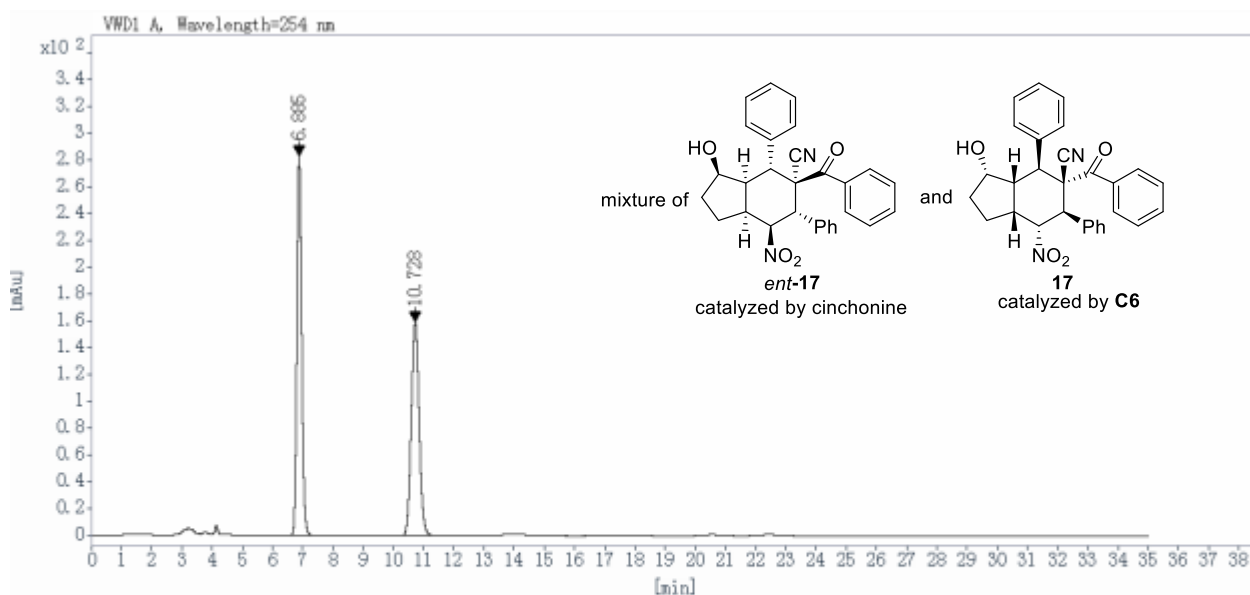

| Ret Time [min] | Peak Type | Width [min] | Height [mAU] | Area [mAU*s] | Area [%] |
|----------------|-----------|-------------|--------------|--------------|----------|
| 6.885          | BB        | 0.17        | 282.8138     | 3109.9202    | 51.8464  |
| 10.728         | VB R      | 0.28        | 159.7134     | 2888.4150    | 48.1536  |
| Totals:        |           |             |              | 5998.3352    | 100.0000 |

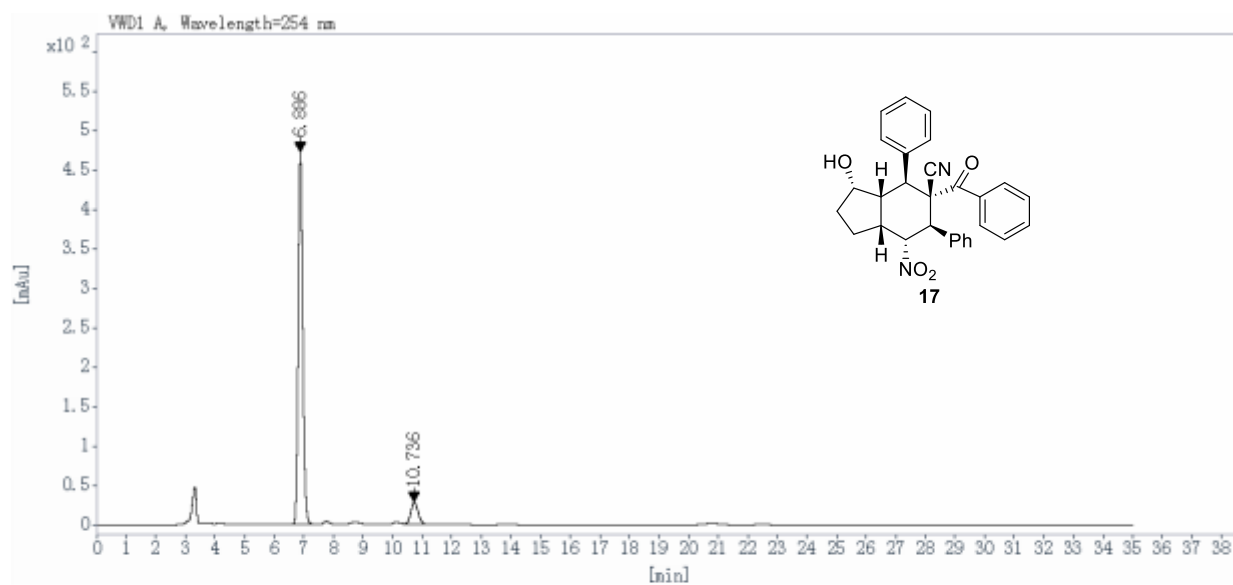

| Ret Time [min] | Peak Type | Width [min] | Height [mAU] | Area [mAU*s] | Area [%] |
|----------------|-----------|-------------|--------------|--------------|----------|
| 6.886          | VB R      | 0.17        | 471.7472     | 5078.5771    | 91.3756  |
| 10.736         | BB        | 0.27        | 27.4894      | 479.3391     | 8.6244   |
| Totals:        |           |             |              | 5557.9163    | 100.0000 |

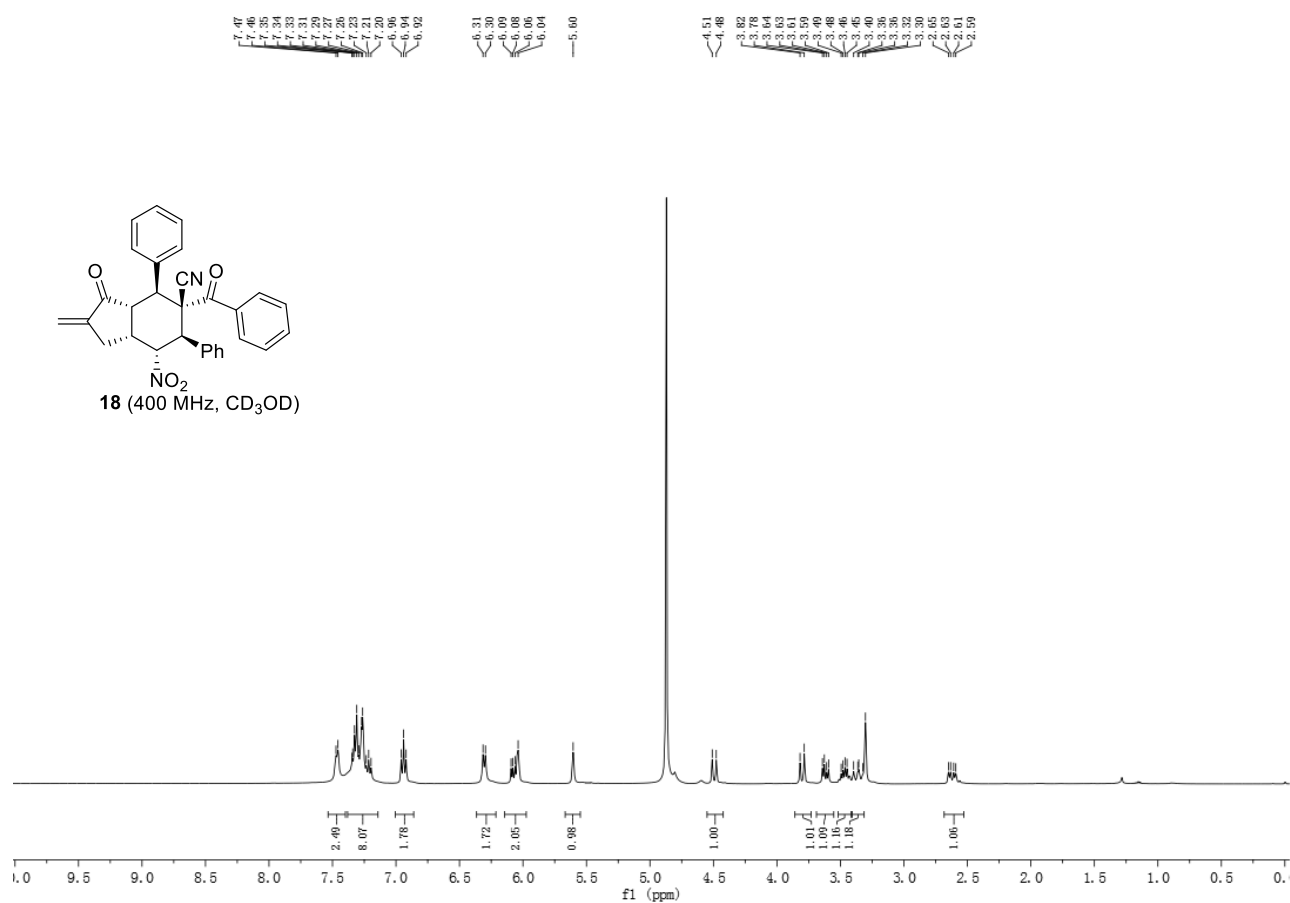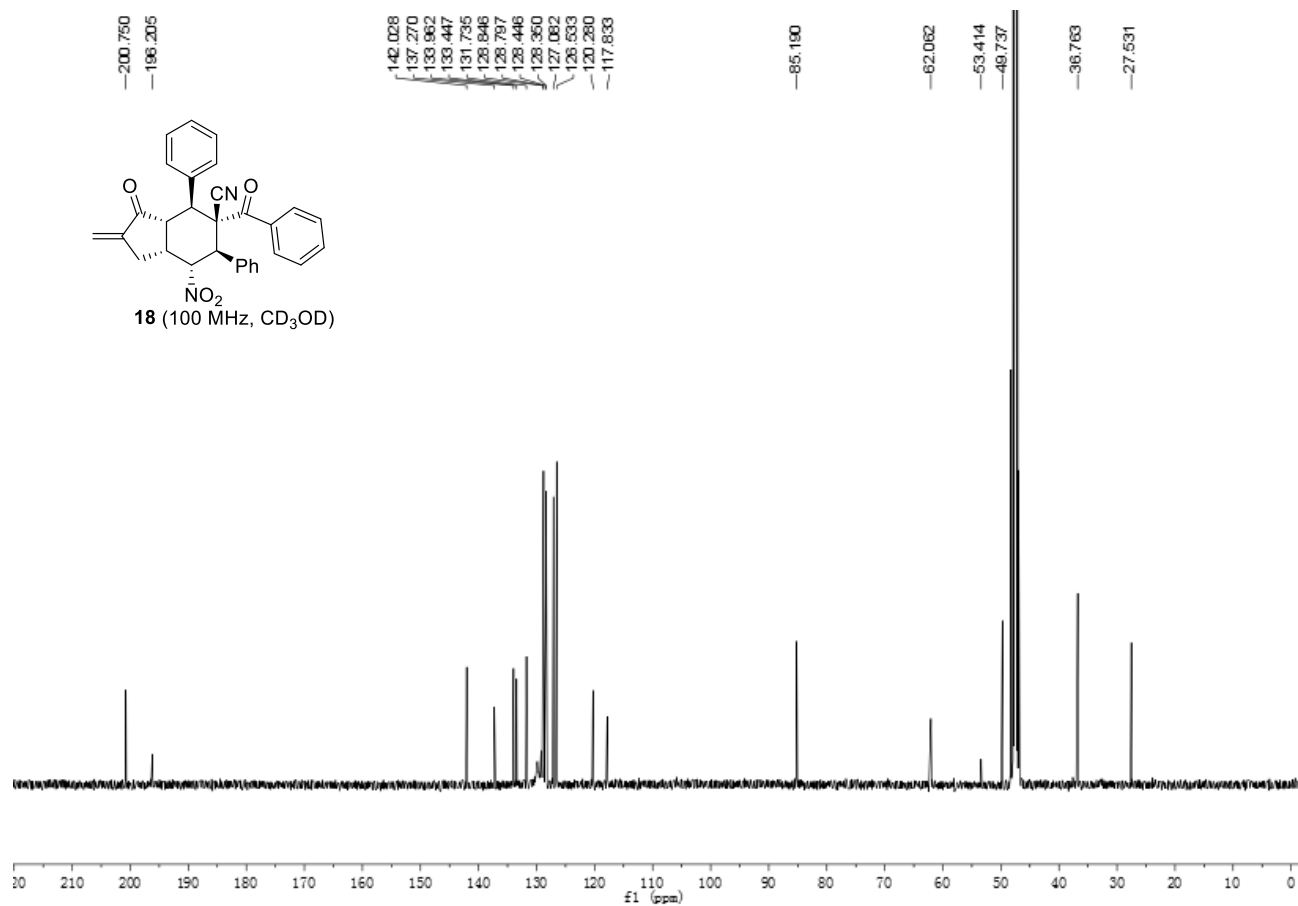



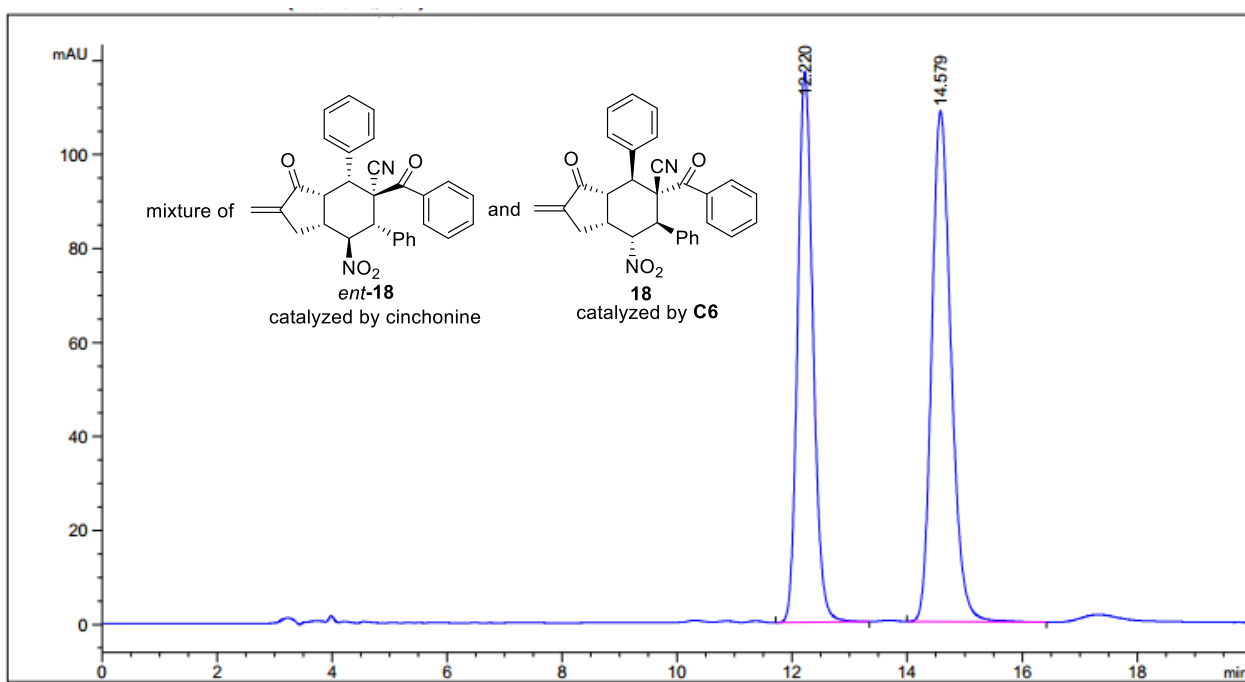

Signal 1: VWD1 A, Wavelength=254 nm

| Peak # | RetTime [min] | Type | Width [min] | Area mAU*s | Height [mAU] | Area %  |
|--------|---------------|------|-------------|------------|--------------|---------|
| 1      | 12.220        | BB   | 0.2875      | 2170.83350 | 117.15895    | 46.0619 |
| 2      | 14.579        | BB   | 0.3617      | 2542.03101 | 108.69978    | 53.9381 |

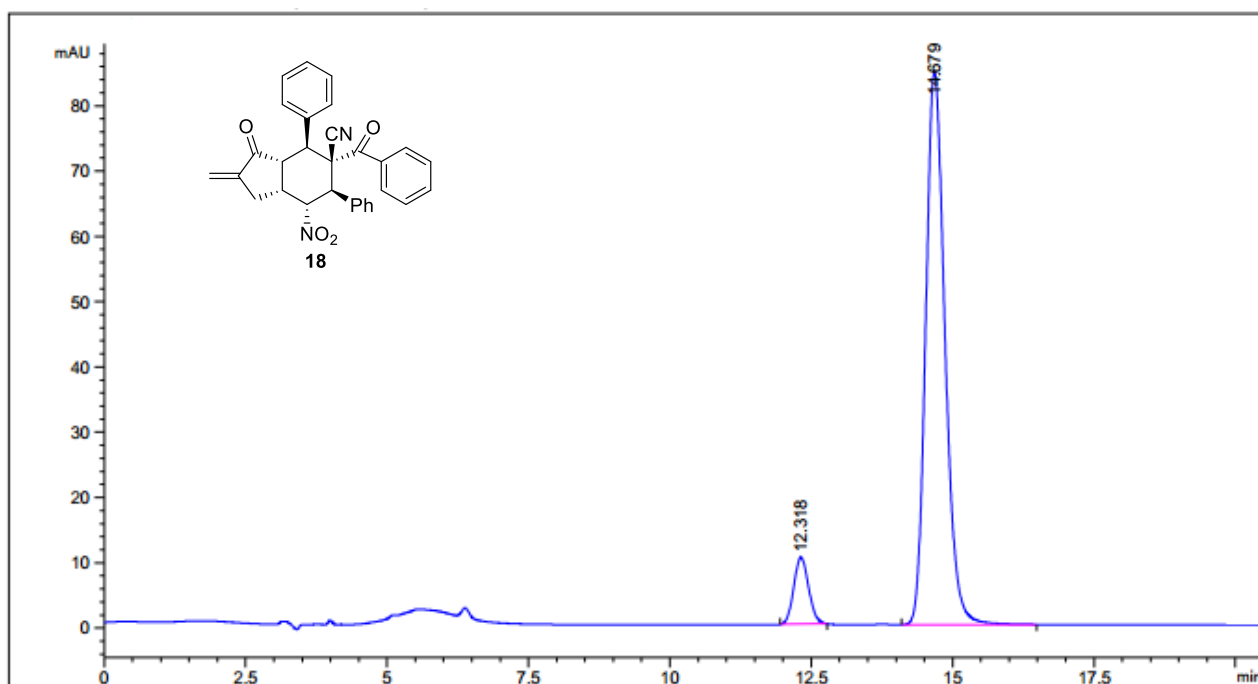

Signal 1: VWD1 A, Wavelength=254 nm

| Peak # | RetTime [min] | Type | Width [min] | Area mAU*s | Height [mAU] | Area %  |
|--------|---------------|------|-------------|------------|--------------|---------|
| 1      | 12.318        | BBA  | 0.2843      | 187.05031  | 10.24533     | 8.5558  |
| 2      | 14.679        | BB   | 0.3625      | 1999.19824 | 84.77782     | 91.4442 |
